# Supplementary material for: Late-life fitness gains and reproductive death in Cardiocondyla obscurior ants
Source: eLife. 2022 Apr 6;11:e74695. doi: 10.7554/eLife.74695 (PMC8986319; doi:10.7554/eLife.74695)
Supplement: Source data 1. — W indicates the treatment (number of workers) and matches the code (A and D for 30, B and E for 20, and C and F for 10 workers). Status indicates 0 = queen alive, 1 = queen dead. [file elife-74695-data1.xlsx]

## Sheet: Sheet1
Source Data 1 - Life-long population survey of 102 queens. W indicates the treatment (number of workers) and matches the Code (A and D for 30, B and E for 20 and C and F for 10 workers). Status indicates 0 = queen alive, 1 = queen's death
Order	Box	Stock_box	Origin_nest	Box_nest	Code	W	Replicate	Setup_date	Week	Date	Shed	Workers	Eggs	Pupae_total	Pupae_W	Pupae_Q	Pupae_M	Pup_MW	Added_W	Queen_alive	Status
81	56	48	2	48_2	C	10	17	43528	1	43535	0	9	5	0	0	0	0	0	1	1	0
82	56	48	2	48_2	C	10	17	43528	2	43542	1	10	6	1	1	0	0	0	0	1	0
83	56	48	2	48_2	C	10	17	43528	3	43549	1	11	4	0	0	0	0	0	0	1	0
84	56	48	2	48_2	C	10	17	43528	4	43556	1	10	6	0	0	0	0	0	0	1	0
85	56	48	2	48_2	C	10	17	43528	5	43563	1	10	7	0	0	0	0	0	0	1	0
86	56	48	2	48_2	C	10	17	43528	6	43570	1	10	8	0	0	0	0	0	0	1	0
87	56	48	2	48_2	C	10	17	43528	7	43577	1	10	8	6	6	0	0	0	0	1	0
88	56	48	2	48_2	C	10	17	43528	8	43584	1	11	8	5	5	0	0	0	0	1	0
89	56	48	2	48_2	C	10	17	43528	9	43591	1	10	8	8	8	0	0	0	0	1	0
90	56	48	2	48_2	C	10	17	43528	10	43598	1	12	1	7	7	0	0	0	0	1	0
91	56	48	2	48_2	C	10	17	43528	11	43605	1	13	0	11	11	0	0	0	0	0	1
92	56	48	2	48_2	C	10	17	43528	12	43612	1	16	0	12	12	0	0	0	0	0
93	56	48	2	48_2	C	10	17	43528	13	43619	1	19	0	9	9	0	0	0	0	0
241	56	48	3	48_3	C	10	2	43479	1	43486	0	10	0	0	0	0	0	0	0	1	0
242	56	48	3	48_3	C	10	2	43479	2	43493	0	10	0	0	0	0	0	0	0	1	0
243	56	48	3	48_3	C	10	2	43479	3	43500	0	13	0	0	0	0	0	0	0	1	0
244	56	48	3	48_3	C	10	2	43479	4	43507	1	12	3	3	3	0	0	0	0	1	0
245	56	48	3	48_3	C	10	2	43479	5	43514	1	10	8	4	4	0	0	0	0	1	0
246	56	48	3	48_3	C	10	2	43479	6	43521	1	14	7	2	2	0	0	0	0	1	0
247	56	48	3	48_3	C	10	2	43479	7	43528	1	10	11	5	5	0	0	0	0	1	0
248	56	48	3	48_3	C	10	2	43479	8	43535	1	11	14	8	8	0	0	0	0	1	0
249	56	48	3	48_3	C	10	2	43479	9	43542	1	16	24	14	14	0	0	0	0	1	0
250	56	48	3	48_3	C	10	2	43479	10	43549	1	15	32	20	20	0	0	0	0	1	0
251	56	48	3	48_3	C	10	2	43479	11	43556	1	21	37	25	24	0	1	0	0	1	0
252	56	48	3	48_3	C	10	2	43479	12	43563	1	23	37	34	27	4	3	0	0	1	0
253	56	48	3	48_3	C	10	2	43479	13	43570	1	27	36	34	33	1	0	0	0	1	0
254	56	48	3	48_3	C	10	2	43479	14	43577	1	22	28	48	44	0	4	0	0	1	0
255	56	48	3	48_3	C	10	2	43479	15	43584	1	31	32	49	42	3	4	0	0	1	0
256	56	48	3	48_3	C	10	2	43479	16	43591	1	35	27	68	62	4	2	0	0	1	0
257	56	48	3	48_3	C	10	2	43479	17	43598	1	34	52	73	71	1	1	0	0	1	0
258	56	48	3	48_3	C	10	2	43479	18	43605	1	50	46	69	66	0	3	0	0	1	0
259	56	48	3	48_3	C	10	2	43479	19	43612	1	48	42	69	66	2	1	0	0	1	0
260	56	48	3	48_3	C	10	2	43479	20	43619	1	50	25	73	70	2	1	0	0	1	0
261	56	48	3	48_3	C	10	2	43479	21	43626	1	46	42	63	60	2	1	0	0	1	0
262	56	48	3	48_3	C	10	2	43479	22	43633	1	62	28	94	82	6	6	0	0	1	0
263	56	48	3	48_3	C	10	2	43479	23	43640	1	42	43	101	91	7	3	0	0	1	0
264	56	48	3	48_3	C	10	2	43479	24	43647	1	48	37	90	82	5	3	0	0	1	0
265	56	48	3	48_3	C	10	2	43479	25	43654	1	59	31	89	83	2	4	0	0	1	0
266	56	48	3	48_3	C	10	2	43479	26	43661	1	59	30	74	68	3	3	0	0	1	0
267	56	48	3	48_3	C	10	2	43479	27	43668	1	49	31	56	51	4	1	0	0	1	0
268	56	48	3	48_3	C	10	2	43479	28	43675	1	38	29	37	32	3	2	0	0	1	0
269	56	48	3	48_3	C	10	2	43479	29	43682	1	36	30	23	19	3	1	0	0	1	0
270	56	48	3	48_3	C	10	2	43479	30	43689	1	16	24	31	26	3	2	0	0	1	0
271	56	48	3	48_3	C	10	2	43479	31	43696	1	22	13	18	16	2	0	0	0	1	0
272	56	48	3	48_3	C	10	2	43479	32	43703	1	18	15	23	23	0	0	0	0	1	0
273	56	48	3	48_3	C	10	2	43479	33	43710	1	18	23	17	15	2	0	0	0	1	0
274	56	48	3	48_3	C	10	2	43479	34	43717	1	18	32	13	12	1	0	0	0	1	0
275	56	48	3	48_3	C	10	2	43479	35	43724	1	11	33	27	24	3	0	0	0	1	0
276	56	48	3	48_3	C	10	2	43479	36	43731	1	16	9	17	17	0	0	0	0	1	0
277	56	48	3	48_3	C	10	2	43479	37	43738	1	22	0	20	20	0	0	0	0	1	0
278	56	48	3	48_3	C	10	2	43479	38	43745	1	19	0	12	12	0	0	0	0	0	1
279	56	48	3	48_3	C	10	2	43479	39	43752	1	22	0	6	6	0	0	0	0	0
280	56	48	3	48_3	C	10	2	43479	40	43759	1	21	0	5	4	1	0	0	0	0
281	56	48	3	48_3	C	10	2	43479	41	43766	1	20	0	3	2	1	0	0	0	0
561	56	48	7	48_7	C	10	7	43480	1	43486	0	10	0	0	0	0	0	0	0	1	0
562	56	48	7	48_7	C	10	7	43480	2	43493	0	10	0	0	0	0	0	0	0	1	0
563	56	48	7	48_7	C	10	7	43480	3	43500	0	15	0	0	0	0	0	0	0	1	0
564	56	48	7	48_7	C	10	7	43480	4	43507	0	15	2	3	3	0	0	0	0	1	0
565	56	48	7	48_7	C	10	7	43480	5	43514	0	12	0	0	0	0	0	0	0	1	0
566	56	48	7	48_7	C	10	7	43480	6	43521	1	13	6	2	2	0	0	0	0	1	0
567	56	48	7	48_7	C	10	7	43480	7	43528	1	11	14	3	3	0	0	0	0	1	0
568	56	48	7	48_7	C	10	7	43480	8	43535	1	13	9	3	3	0	0	0	0	1	0
569	56	48	7	48_7	C	10	7	43480	9	43542	1	11	13	2	2	0	0	0	0	1	0
570	56	48	7	48_7	C	10	7	43480	10	43549	1	12	21	9	9	0	0	0	0	1	0
571	56	48	7	48_7	C	10	7	43480	11	43556	1	13	12	11	11	0	0	0	0	1	0
572	56	48	7	48_7	C	10	7	43480	12	43563	1	15	15	12	12	0	0	0	0	1	0
573	56	48	7	48_7	C	10	7	43480	13	43570	1	11	28	23	23	0	0	0	0	1	0
574	56	48	7	48_7	C	10	7	43480	14	43577	1	22	40	20	20	0	0	0	0	1	0
575	56	48	7	48_7	C	10	7	43480	15	43584	1	20	35	16	14	2	0	0	0	1	0
576	56	48	7	48_7	C	10	7	43480	16	43591	1	18	21	21	16	4	1	0	0	1	0
577	56	48	7	48_7	C	10	7	43480	17	43598	1	14	25	26	23	3	0	0	0	1	0
578	56	48	7	48_7	C	10	7	43480	18	43605	1	18	39	24	21	1	2	0	0	1	0
579	56	48	7	48_7	C	10	7	43480	19	43612	1	20	55	26	25	1	0	0	0	1	0
580	56	48	7	48_7	C	10	7	43480	20	43619	1	20	11	13	13	0	0	0	0	1	0
581	56	48	7	48_7	C	10	7	43480	21	43626	1	20	38	16	15	0	1	0	0	1	0
582	56	48	7	48_7	C	10	7	43480	22	43633	1	14	44	30	27	3	0	0	0	1	0
583	56	48	7	48_7	C	10	7	43480	23	43640	1	23	55	44	40	3	1	0	0	1	0
584	56	48	7	48_7	C	10	7	43480	24	43647	1	24	14	56	54	1	1	0	0	1	0
585	56	48	7	48_7	C	10	7	43480	25	43654	1	43	0	52	48	1	3	0	0	0	1
586	56	48	7	48_7	C	10	7	43480	26	43661	1	59	0	33	33	0	0	0	0	0
587	56	48	7	48_7	C	10	7	43480	27	43668	1	72	0	22	22	0	0	0	0	0
588	56	48	7	48_7	C	10	7	43480	28	43675	1	67	0	6	4	2	0	0	0	0
721	56	34	1	34_1	F	10	9	43480	1	43486	0	10	0	0	0	0	0	0	0	1	0
722	56	34	1	34_1	F	10	9	43480	2	43493	0	10	0	0	0	0	0	0	0	1	0
723	56	34	1	34_1	F	10	9	43480	3	43500	0	17	4	0	0	0	0	0	0	1	0
724	56	34	1	34_1	F	10	9	43480	4	43507	0	14	1	3	3	0	0	0	0	1	0
725	56	34	1	34_1	F	10	9	43480	5	43514	1	11	8	1	1	0	0	0	0	1	0
726	56	34	1	34_1	F	10	9	43480	6	43521	1	10	14	9	9	0	0	0	0	1	0
727	56	34	1	34_1	F	10	9	43480	7	43528	1	12	16	10	10	0	0	0	0	1	0
728	56	34	1	34_1	F	10	9	43480	8	43535	1	18	15	5	5	0	0	0	0	1	0
729	56	34	1	34_1	F	10	9	43480	9	43542	1	9	22	10	10	0	0	0	0	1	0
730	56	34	1	34_1	F	10	9	43480	10	43549	1	14	34	22	22	0	0	0	0	1	0
731	56	34	1	34_1	F	10	9	43480	11	43556	1	22	28	20	20	0	0	0	0	1	0
732	56	34	1	34_1	F	10	9	43480	12	43563	1	21	30	21	17	3	1	0	0	1	0
733	56	34	1	34_1	F	10	9	43480	13	43570	1	22	23	23	21	2	0	0	0	1	0
734	56	34	1	34_1	F	10	9	43480	14	43577	1	17	23	28	24	4	0	0	0	1	0
735	56	34	1	34_1	F	10	9	43480	15	43584	1	18	18	23	19	4	0	0	0	1	0
736	56	34	1	34_1	F	10	9	43480	16	43591	1	20	18	19	15	4	0	0	0	1	0
737	56	34	1	34_1	F	10	9	43480	17	43598	1	18	18	10	9	1	0	0	0	1	0
738	56	34	1	34_1	F	10	9	43480	18	43605	1	20	22	8	8	0	0	0	0	1	0
739	56	34	1	34_1	F	10	9	43480	19	43612	1	14	24	9	9	0	0	0	0	1	0
740	56	34	1	34_1	F	10	9	43480	20	43619	1	15	30	22	22	0	0	0	0	1	0
741	56	34	1	34_1	F	10	9	43480	21	43626	1	19	35	17	17	0	0	0	0	1	0
742	56	34	1	34_1	F	10	9	43480	22	43633	1	20	25	17	17	0	0	0	0	1	0
743	56	34	1	34_1	F	10	9	43480	23	43640	1	19	33	18	18	0	0	0	0	1	0
744	56	34	1	34_1	F	10	9	43480	24	43647	1	17	40	26	23	2	1	0	0	1	0
745	56	34	1	34_1	F	10	9	43480	25	43654	1	19	30	37	30	6	1	0	0	1	0
746	56	34	1	34_1	F	10	9	43480	26	43661	1	24	27	24	21	1	2	0	0	1	0
747	56	34	1	34_1	F	10	9	43480	27	43668	1	26	38	26	25	1	0	0	0	1	0
748	56	34	1	34_1	F	10	9	43480	28	43675	1	17	27	36	31	5	0	0	0	1	0
749	56	34	1	34_1	F	10	9	43480	29	43682	1	29	30	29	26	3	0	0	0	1	0
750	56	34	1	34_1	F	10	9	43480	30	43689	1	23	19	28	28	0	0	0	0	1	0
751	56	34	1	34_1	F	10	9	43480	31	43696	1	25	12	39	33	2	4	0	0	0	1
752	56	34	1	34_1	F	10	9	43480	32	43703	1	35	0	28	27	0	1	0	0	0
753	56	34	1	34_1	F	10	9	43480	33	43710	1	52	0	27	27	0	0	0	0	0
754	56	34	1	34_1	F	10	9	43480	34	43717	1	49	0	21	18	2	1	0	0	0
755	56	34	1	34_1	F	10	9	43480	35	43724	1	60	0	18	13	5	0	0	0	0
756	56	34	1	34_1	F	10	9	43480	36	43731	1	48	0	4	2	2	0	0	0	0
1041	56	34	5	34_5	C	10	8	43480	1	43486	0	10	0	0	0	0	0	0	0	1	0
1042	56	34	5	34_5	C	10	8	43480	2	43493	0	10	0	0	0	0	0	0	0	1	0
1043	56	34	5	34_5	C	10	8	43480	3	43500	1	11	3	4	4	0	0	0	0	1	0
1044	56	34	5	34_5	C	10	8	43480	4	43507	1	10	0	2	2	0	0	0	0	1	0
1045	56	34	5	34_5	C	10	8	43480	5	43514	1	17	9	7	7	0	0	0	0	1	0
1046	56	34	5	34_5	C	10	8	43480	6	43521	1	14	15	9	9	0	0	0	0	1	0
1047	56	34	5	34_5	C	10	8	43480	7	43528	1	10	16	11	11	0	0	0	0	1	0
1048	56	34	5	34_5	C	10	8	43480	8	43535	1	14	17	12	12	0	0	0	0	1	0
1049	56	34	5	34_5	C	10	8	43480	9	43542	1	20	22	14	14	0	0	0	0	1	0
1050	56	34	5	34_5	C	10	8	43480	10	43549	1	15	19	17	17	0	0	0	0	1	0
1051	56	34	5	34_5	C	10	8	43480	11	43556	1	17	16	12	10	2	0	0	0	1	0
1052	56	34	5	34_5	C	10	8	43480	12	43563	1	19	20	16	14	2	0	0	0	1	0
1053	56	34	5	34_5	C	10	8	43480	13	43570	1	17	21	16	16	0	0	0	0	1	0
1054	56	34	5	34_5	C	10	8	43480	14	43577	1	20	28	20	19	1	0	0	0	1	0
1055	56	34	5	34_5	C	10	8	43480	15	43584	1	22	22	15	15	0	0	0	0	1	0
1056	56	34	5	34_5	C	10	8	43480	16	43591	1	17	26	18	18	0	0	0	0	1	0
1057	56	34	5	34_5	C	10	8	43480	17	43598	1	16	26	22	22	0	0	0	0	1	0
1058	56	34	5	34_5	C	10	8	43480	18	43605	1	24	39	15	15	0	0	0	0	1	0
1059	56	34	5	34_5	C	10	8	43480	19	43612	1	19	34	19	17	2	0	0	0	1	0
1060	56	34	5	34_5	C	10	8	43480	20	43619	1	14	12	16	16	0	0	0	0	1	0
1061	56	34	5	34_5	C	10	8	43480	21	43626	1	18	24	21	18	2	1	0	0	1	0
1062	56	34	5	34_5	C	10	8	43480	22	43633	1	18	31	13	10	3	0	0	0	1	0
1063	56	34	5	34_5	C	10	8	43480	23	43640	1	15	40	14	13	1	0	0	0	1	0
1064	56	34	5	34_5	C	10	8	43480	24	43647	1	53	21	23	18	3	2	0	0	1	0
1065	56	34	5	34_5	C	10	8	43480	25	43654	1	19	20	19	19	0	0	0	0	1	0
1066	56	34	5	34_5	C	10	8	43480	26	43661	1	12	25	21	20	1	0	0	0	1	0
1067	56	34	5	34_5	C	10	8	43480	27	43668	1	25	27	12	12	0	0	0	0	1	0
1068	56	34	5	34_5	C	10	8	43480	28	43675	1	25	22	8	7	1	0	0	0	1	0
1069	56	34	5	34_5	C	10	8	43480	29	43682	1	16	6	10	9	1	0	0	0	0	1
1070	56	34	5	34_5	C	10	8	43480	30	43689	1	13	0	13	10	3	0	0	0	0
1071	56	34	5	34_5	C	10	8	43480	31	43696	1	20	0	6	6	0	0	0	0	0
1072	56	34	5	34_5	C	10	8	43480	32	43703	1	13	0	9	8	1	0	0	0	0
1073	56	34	5	34_5	C	10	8	43480	33	43710	1	23	0	5	4	1	0	0	0	0
1074	56	34	5	34_5	C	10	8	43480	34	43717	1	24	0	2	2	0	0	0	0	0
1281	56	41	1	41_1	F	10	3	43521	1	43528	0	10	0	2	2	0	0	0	0	1	0
1282	56	41	1	41_1	F	10	3	43521	2	43535	0	11	0	3	3	0	0	0	0	1	0
1283	56	41	1	41_1	F	10	3	43521	3	43542	0	11	3	5	5	0	0	0	0	1	0
1284	56	41	1	41_1	F	10	3	43521	4	43549	0	12	2	0	0	0	0	0	0	1	0
1285	56	41	1	41_1	F	10	3	43521	5	43556	0	13	6	0	0	0	0	0	0	1	0
1286	56	41	1	41_1	F	10	3	43521	6	43563		11	5	0	0	0	0	0	0	1	0
1287	56	41	1	41_1	F	10	3	43521	7	43570		9	5	0	0	0	0	0	0	1	0
1288	56	41	1	41_1	F	10	3	43521	8	43577		9	8	2	2	0	0	0	0	1	0
1289	56	41	1	41_1	F	10	3	43521	9	43584		10	6	3	3	0	0	0	0	1	0
1290	56	41	1	41_1	F	10	3	43521	10	43591		9	10	3	3	0	0	0	0	1	0
1291	56	41	1	41_1	F	10	3	43521	11	43598		11	13	6	6	0	0	0	0	1	0
1292	56	41	1	41_1	F	10	3	43521	12	43605		12	21	10	10	0	0	0	0	1	0
1293	56	41	1	41_1	F	10	3	43521	13	43612		14	26	8	8	0	0	0	0	1	0
1294	56	41	1	41_1	F	10	3	43521	14	43619		15	21	17	17	0	0	0	0	1	0
1295	56	41	1	41_1	F	10	3	43521	15	43626		17	35	19	16	2	1	0	0	1	0
1296	56	41	1	41_1	F	10	3	43521	16	43633		17	18	23	20	3	0	0	0	1	0
1297	56	41	1	41_1	F	10	3	43521	17	43640		22	27	26	23	3	0	0	0	1	0
1298	56	41	1	41_1	F	10	3	43521	18	43647		22	28	41	36	4	1	0	0	1	0
1299	56	41	1	41_1	F	10	3	43521	19	43654		24	23	38	35	3	0	0	0	1	0
1300	56	41	1	41_1	F	10	3	43521	20	43661	1	28	31	31	29	1	0	1	0	1	0
1301	56	41	1	41_1	F	10	3	43521	21	43668	1	27	27	30	26	3	1	0	0	1	0
1302	56	41	1	41_1	F	10	3	43521	22	43675	1	23	25	25	21	3	1	0	0	1	0
1303	56	41	1	41_1	F	10	3	43521	23	43682	1	20	31	31	29	1	1	0	0	1	0
1304	56	41	1	41_1	F	10	3	43521	24	43689	1	20	37	44	39	5	0	0	0	1	0
1305	56	41	1	41_1	F	10	3	43521	25	43696	1	33	28	41	35	5	1	0	0	1	0
1306	56	41	1	41_1	F	10	3	43521	26	43703	1	24	25	39	35	3	1	0	0	1	0
1307	56	41	1	41_1	F	10	3	43521	27	43710	1	30	38	39	34	5	0	0	0	1	0
1308	56	41	1	41_1	F	10	3	43521	28	43717	1	23	32	36	32	4	0	0	0	1	0
1309	56	41	1	41_1	F	10	3	43521	29	43724	1	32	19	36	32	4	0	0	0	1	0
1310	56	41	1	41_1	F	10	3	43521	30	43731	1	25	20	30	20	10	0	0	0	1	0
1311	56	41	1	41_1	F	10	3	43521	31	43738	1	26	14	37	23	12	2	0	0	1	0
1312	56	41	1	41_1	F	10	3	43521	32	43745	1	21	0	38	27	0	11	0	0	0	1
1313	56	41	1	41_1	F	10	3	43521	33	43752	1	31	0	13	13	0	0	0	0	0
1314	56	41	1	41_1	F	10	3	43521	34	43759	1	39	0	6	2	2	2	0	0	0
1315	56	41	1	41_1	F	10	3	43521	35	43766	1	41	0	3	3	0	0	0	0	0
1361	56	41	2	41_2	F	10	20	43517	1	43521	0	10	0	0	0	0	0	0	0	1	0
1362	56	41	2	41_2	F	10	20	43517	2	43528	1	10	3	0	0	0	0	0	0	1	0
1363	56	41	2	41_2	F	10	20	43517	3	43535	1	11	6	4	4	0	0	0	0	1	0
1364	56	41	2	41_2	F	10	20	43517	4	43542	1	11	5	5	5	0	0	0	0	1	0
1365	56	41	2	41_2	F	10	20	43517	5	43549	1	12	3	3	3	0	0	0	0	1	0
1366	56	41	2	41_2	F	10	20	43517	6	43556	1	11	4	0	0	0	0	0	0	1	0
1367	56	41	2	41_2	F	10	20	43517	7	43563	1	10	3	1	1	0	0	0	0	1	0
1368	56	41	2	41_2	F	10	20	43517	8	43570	1	10	4	4	4	0	0	0	0	1	0
1369	56	41	2	41_2	F	10	20	43517	9	43577	1	11	3	3	3	0	0	0	0	1	0
1370	56	41	2	41_2	F	10	20	43517	10	43584	1	13	2	3	3	0	0	0	0	1	0
1371	56	41	2	41_2	F	10	20	43517	11	43591	1	11	4	4	4	0	0	0	0	1	0
1372	56	41	2	41_2	F	10	20	43517	12	43598	1	12	1	3	3	0	0	0	0	1	0
1373	56	41	2	41_2	F	10	20	43517	13	43605	1	13	2	2	2	0	0	0	0	1	0
1374	56	41	2	41_2	F	10	20	43517	14	43612	1	9	3	2	2	0	0	0	0	1	0
1375	56	41	2	41_2	F	10	20	43517	15	43619	1	10	4	3	3	0	0	0	0	1	0
1376	56	41	2	41_2	F	10	20	43517	16	43626	1	11	0	4	4	0	0	0	0	1	0
1377	56	41	2	41_2	F	10	20	43517	17	43633	1	11	0	2	2	0	0	0	0	1	0
1378	56	41	2	41_2	F	10	20	43517	18	43640	1	11	0	1	1	0	0	0	0	0	1
1379	56	41	2	41_2	F	10	20	43517	19	43647	1	12	0	2	2	0	0	0	0	0
1441	58	41	9	41_9	F	10	15	43481	1	43486	0	10	0	0	0	0	0	0	0	1	0
1442	58	41	9	41_9	F	10	15	43481	2	43493	0	10	0	0	0	0	0	0	-2	1	0
1443	58	41	9	41_9	F	10	15	43481	3	43500	0	10	0	0	0	0	0	0	0	1	0
1444	58	41	9	41_9	F	10	15	43481	4	43507	1	12	3	0	0	0	0	0	2	1	0
1445	58	41	9	41_9	F	10	15	43481	5	43514	1	10	5	1	1	0	0	0	0	1	0
1446	58	41	9	41_9	F	10	15	43481	6	43521	1	8	4	1	1	0	0	0	1	1	0
1447	58	41	9	41_9	F	10	15	43481	7	43528	1	10	4	12	4	4	4	0	0	1	0
1448	58	41	9	41_9	F	10	15	43481	8	43535	1	10	9	0	0	0	0	0	0	1	0
1449	58	41	9	41_9	F	10	15	43481	9	43542	1	10	8	1	1	0	0	0	0	1	0
1450	58	41	9	41_9	F	10	15	43481	10	43549	1	8	10	4	4	0	0	0	2	1	0
1451	58	41	9	41_9	F	10	15	43481	11	43556	1	11	4	5	5	0	0	0	0	1	0
1452	58	41	9	41_9	F	10	15	43481	12	43563	1	13	5	4	4	0	0	0	0	1	0
1453	58	41	9	41_9	F	10	15	43481	13	43570	1	11	8	5	5	0	0	0	0	1	0
1454	58	41	9	41_9	F	10	15	43481	14	43577	1	12	7	5	4	1	0	0	0	1	0
1455	58	41	9	41_9	F	10	15	43481	15	43584	1	11	11	5	5	0	0	0	0	1	0
1456	58	41	9	41_9	F	10	15	43481	16	43591	1	12	9	4	4	0	0	0	0	1	0
1457	58	41	9	41_9	F	10	15	43481	17	43598	1	11	11	5	5	0	0	0	0	1	0
1458	58	41	9	41_9	F	10	15	43481	18	43605	1	11	6	5	5	0	0	0	0	1	0
1459	58	41	9	41_9	F	10	15	43481	19	43612	1	10	10	5	4	0	0	1	0	1	0
1460	58	41	9	41_9	F	10	15	43481	20	43619	1	10	12	8	8	0	0	0	0	1	0
1461	58	41	9	41_9	F	10	15	43481	21	43626	1	13	14	10	9	0	1	0	0	1	0
1462	58	41	9	41_9	F	10	15	43481	22	43633	1	13	13	6	6	0	0	0	0	1	0
1463	58	41	9	41_9	F	10	15	43481	23	43640	1	12	17	8	8	0	0	0	0	1	0
1464	58	41	9	41_9	F	10	15	43481	24	43647	1	14	0	17	14	3	0	0	0	0	1
1465	58	41	9	41_9	F	10	15	43481	25	43654	1	19	0	18	18	0	0	0	0	0
1466	58	41	9	41_9	F	10	15	43481	26	43661	1	26	0	14	13	0	1	0	0	0
1467	58	41	9	41_9	F	10	15	43481	27	43668	1	33	0	6	5	1	0	0	0	0
1468	58	41	9	41_9	F	10	15	43481	28	43675	1	34	0	3	2	1	0	0	0	0
1469	58	41	9	41_9	F	10	15	43481	29	43682	1	32	0	2	1	1	0	0	0	0
1521	58	41	10	41_10	C	10	6	43517	1	43521	0	10	0	0	0	0	0	0	0	1	0
1522	58	41	10	41_10	C	10	6	43517	2	43528	0	12	4	8	8	0	0	0	0	1	0
1523	58	41	10	41_10	C	10	6	43517	3	43535	0	14	8	4	4	0	0	0	0	1	0
1524	58	41	10	41_10	C	10	6	43517	4	43542	1	11	4	2	2	0	0	0	0	1	0
1525	58	41	10	41_10	C	10	6	43517	5	43549	1	12	9	1	1	0	0	0	0	1	0
1526	58	41	10	41_10	C	10	6	43517	6	43556	1	10	15	6	6	0	0	0	0	1	0
1527	58	41	10	41_10	C	10	6	43517	7	43563	1	10	23	12	12	0	0	0	0	1	0
1528	58	41	10	41_10	C	10	6	43517	8	43570	1	13	20	6	6	0	0	0	0	1	0
1529	58	41	10	41_10	C	10	6	43517	9	43577	1	14	17	5	5	0	0	0	0	1	0
1530	58	41	10	41_10	C	10	6	43517	10	43584	1	12	17	11	10	0	1	0	0	1	0
1531	58	41	10	41_10	C	10	6	43517	11	43591	1	13	15	15	13	1	1	0	0	1	0
1532	58	41	10	41_10	C	10	6	43517	12	43598	1	13	20	12	12	0	0	0	0	1	0
1533	58	41	10	41_10	C	10	6	43517	13	43605	1	19	23	9	9	0	0	0	0	1	0
1534	58	41	10	41_10	C	10	6	43517	14	43612	1	13	27	12	12	0	0	0	0	1	0
1535	58	41	10	41_10	C	10	6	43517	15	43619	1	15	32	16	15	0	1	0	0	1	0
1536	58	41	10	41_10	C	10	6	43517	16	43626	1	16	24	24	20	4	0	0	0	1	0
1537	58	41	10	41_10	C	10	6	43517	17	43633	1	22	27	24	21	3	0	0	0	1	0
1538	58	41	10	41_10	C	10	6	43517	18	43640	1	19	28	21	21	0	0	0	0	1	0
1539	58	41	10	41_10	C	10	6	43517	19	43647	1	18	30	39	32	7	0	0	0	1	0
1540	58	41	10	41_10	C	10	6	43517	20	43654	1	21	41	41	38	3	0	0	0	1	0
1541	58	41	10	41_10	C	10	6	43517	21	43661	1	30	30	28	28	0	0	0	0	1	0
1542	58	41	10	41_10	C	10	6	43517	22	43668	1	24	26	25	24	0	1	0	0	1	0
1543	58	41	10	41_10	C	10	6	43517	23	43675	1	18	42	37	37	0	0	0	0	1	0
1544	58	41	10	41_10	C	10	6	43517	24	43682	1	23	28	42	40	2	0	0	0	1	0
1545	58	41	10	41_10	C	10	6	43517	25	43689	1	39	22	37	37	0	0	0	0	1	0
1546	58	41	10	41_10	C	10	6	43517	26	43696	1	32	32	29	27	1	1	0	0	1	0
1547	58	41	10	41_10	C	10	6	43517	27	43703	1	18	2	41	35	6	0	0	0	0	1
1548	58	41	10	41_10	C	10	6	43517	28	43710	1	39	0	35	27	8	0	0	0	0
1549	58	41	10	41_10	C	10	6	43517	29	43717	1	38	0	35	27	8	0	0	0	0
1550	58	41	10	41_10	C	10	6	43517	30	43724	1	56	0	25	25	0	0	0	0	0
1551	58	41	10	41_10	C	10	6	43517	31	43731	1	63	0	12	11	1	0	0	0	0
1552	58	41	10	41_10	C	10	6	43517	32	43738	1	68	0	0	0	0	0	0	0	0
1681	58	18	2	18_2	F	10	5	43482	1	43486	0	10	0	0	0	0	0	0	0	1	0
1682	58	18	2	18_2	F	10	5	43482	2	43493	0	10	0	0	0	0	0	0	0	1	0
1683	58	18	2	18_2	F	10	5	43482	3	43500	1	10	4	0	0	0	0	0	0	1	0
1684	58	18	2	18_2	F	10	5	43482	4	43507	1	14	2	2	2	0	0	0	0	1	0
1685	58	18	2	18_2	F	10	5	43482	5	43514	1	10	3	3	3	0	0	0	0	1	0
1686	58	18	2	18_2	F	10	5	43482	6	43521	1	10	4	0	0	0	0	0	0	1	0
1687	58	18	2	18_2	F	10	5	43482	7	43528	1	10	10	5	5	0	0	0	0	1	0
1688	58	18	2	18_2	F	10	5	43482	8	43535	1	11	10	5	5	0	0	0	0	1	0
1689	58	18	2	18_2	F	10	5	43482	9	43542	1	9	5	4	4	0	0	0	0	1	0
1690	58	18	2	18_2	F	10	5	43482	10	43549	1	15	4	3	3	0	0	0	0	1	0
1691	58	18	2	18_2	F	10	5	43482	11	43556	1	12	9	5	5	0	0	0	0	1	0
1692	58	18	2	18_2	F	10	5	43482	12	43563	1	13	12	4	4	0	0	0	0	1	0
1693	58	18	2	18_2	F	10	5	43482	13	43570	1	12	5	5	5	0	0	0	0	1	0
1694	58	18	2	18_2	F	10	5	43482	14	43577	1	13	8	1	1	0	0	0	0	1	0
1695	58	18	2	18_2	F	10	5	43482	15	43584	1	12	10	1	1	0	0	0	0	1	0
1696	58	18	2	18_2	F	10	5	43482	16	43591	1	19	6	3	3	0	0	0	0	1	0
1697	58	18	2	18_2	F	10	5	43482	17	43598	1	10	6	4	4	0	0	0	0	1	0
1698	58	18	2	18_2	F	10	5	43482	18	43605	1	10	11	3	3	0	0	0	0	1	0
1699	58	18	2	18_2	F	10	5	43482	19	43612	1	10	8	2	2	0	0	0	0	1	0
1700	58	18	2	18_2	F	10	5	43482	20	43619	1	13	3	0	0	0	0	0	0	1	0
1701	58	18	2	18_2	F	10	5	43482	21	43626	1	10	8	0	0	0	0	0	0	1	0
1702	58	18	2	18_2	F	10	5	43482	22	43633	1	8	5	1	1	0	0	0	2	1	0
1703	58	18	2	18_2	F	10	5	43482	23	43640	1	11	6	4	4	0	0	0	0	1	0
1704	58	18	2	18_2	F	10	5	43482	24	43647	1	11	8	6	6	0	0	0	0	1	0
1705	58	18	2	18_2	F	10	5	43482	25	43654	1	11	6	7	7	0	0	0	0	0	1
1706	58	18	2	18_2	F	10	5	43482	26	43661	1	13	1	5	5	0	0	0	0	0
1707	58	18	2	18_2	F	10	5	43482	27	43668	1	14	1	5	5	0	0	0	0	0
1708	58	18	2	18_2	F	10	5	43482	28	43675	1	17	0	7	7	0	0	0	0	0
1709	58	18	2	18_2	F	10	5	43482	29	43682	1	17	0	5	5	0	0	0	0	0
1841	58	18	4	18_4	C	10	18	43482	1	43486	0	10	0	0	0	0	0	0	0	1	0
1842	58	18	4	18_4	C	10	18	43482	2	43493	0	10	0	0	0	0	0	0	0	1	0
1843	58	18	4	18_4	C	10	18	43482	3	43500	1	11	5	3	3	0	0	0	0	1	0
1844	58	18	4	18_4	C	10	18	43482	4	43507	1	12	7	0	0	0	0	0	0	1	0
1845	58	18	4	18_4	C	10	18	43482	5	43514	1	10	8	0	0	0	0	0	0	1	0
1846	58	18	4	18_4	C	10	18	43482	6	43521	1	9	10	3	3	0	0	0	1	1	0
1847	58	18	4	18_4	C	10	18	43482	7	43528	1	10	11	7	7	0	0	0	0	1	0
1848	58	18	4	18_4	C	10	18	43482	8	43535	1	12	19	8	8	0	0	0	0	1	0
1849	58	18	4	18_4	C	10	18	43482	9	43542	1	16	18	9	9	0	0	0	0	1	0
1850	58	18	4	18_4	C	10	18	43482	10	43549	1	11	18	8	8	0	0	0	0	1	0
1851	58	18	4	18_4	C	10	18	43482	11	43556	1	17	16	10	10	0	0	0	0	1	0
1852	58	18	4	18_4	C	10	18	43482	12	43563	1	14	28	18	14	3	1	0	0	1	0
1853	58	18	4	18_4	C	10	18	43482	13	43570	1	16	29	14	12	2	0	0	0	1	0
1854	58	18	4	18_4	C	10	18	43482	14	43577	1	17	38	11	9	2	0	0	0	1	0
1855	58	18	4	18_4	C	10	18	43482	15	43584	1	16	25	11	11	0	0	0	0	1	0
1856	58	18	4	18_4	C	10	18	43482	16	43591	1	11	27	17	13	4	0	0	0	1	0
1857	58	18	4	18_4	C	10	18	43482	17	43598	1	16	34	11	10	1	0	0	0	1	0
1858	58	18	4	18_4	C	10	18	43482	18	43605	1	12	8	3	3	0	0	0	0	1	0
1859	58	18	4	18_4	C	10	18	43482	19	43612	1	12	18	11	10	1	0	0	0	1	0
1860	58	18	4	18_4	C	10	18	43482	20	43619	1	14	26	13	13	0	0	0	0	1	0
1861	58	18	4	18_4	C	10	18	43482	21	43626	1	18	45	17	15	1	1	0	0	1	0
1862	58	18	4	18_4	C	10	18	43482	22	43633	1	15	16	24	23	0	1	0	0	1	0
1863	58	18	4	18_4	C	10	18	43482	23	43640	1	17	0	25	25	0	0	0	0	0	1
1864	58	18	4	18_4	C	10	18	43482	24	43647	1	30	0	21	21	0	0	0	0	0
1865	58	18	4	18_4	C	10	18	43482	25	43654	1	35	0	16	15	1	0	0	0	0
1866	58	18	4	18_4	C	10	18	43482	26	43661	1	41	0	7	7	0	0	0	0	0
1867	58	18	4	18_4	C	10	18	43482	27	43668	1	48	0	3	3	0	0	0	0	0
2321	58	18	10	18_10	F	10	7	43517	1	43521	0	10	0	0	0	0	0	0	0	1	0
2322	58	18	10	18_10	F	10	7	43517	2	43528	0	8	0	0	0	0	0	0	0	1	0
2323	58	18	10	18_10	F	10	7	43517	3	43535	0	10	6	1	1	0	0	0	0	1	0
2324	58	18	10	18_10	F	10	7	43517	4	43542	1	10	6	1	1	0	0	0	0	1	0
2325	58	18	10	18_10	F	10	7	43517	5	43549	1	11	6	0	0	0	0	0	0	1	0
2326	58	18	10	18_10	F	10	7	43517	6	43556	1	10	7	1	1	0	0	0	0	1	0
2327	58	18	10	18_10	F	10	7	43517	7	43563	1	10	17	7	7	0	0	0	0	1	0
2328	58	18	10	18_10	F	10	7	43517	8	43570	1	12	16	10	10	0	0	0	0	1	0
2329	58	18	10	18_10	F	10	7	43517	9	43577	1	14	18	10	10	0	0	0	0	1	0
2330	58	18	10	18_10	F	10	7	43517	10	43584	1	17	24	15	15	0	0	0	0	1	0
2331	58	18	10	18_10	F	10	7	43517	11	43591	1	17	15	21	21	0	0	0	0	1	0
2332	58	18	10	18_10	F	10	7	43517	12	43598	1	30	20	30	24	6	0	0	0	1	0
2333	58	18	10	18_10	F	10	7	43517	13	43605	1	21	24	34	29	4	1	0	0	1	0
2334	58	18	10	18_10	F	10	7	43517	14	43612	1	24	33	35	33	1	1	0	0	1	0
2335	58	18	10	18_10	F	10	7	43517	15	43619	1	29	34	28	28	0	0	0	0	1	0
2336	58	18	10	18_10	F	10	7	43517	16	43626	1	26	36	39	30	8	1	0	0	1	0
2337	58	18	10	18_10	F	10	7	43517	17	43633	1	20	24	46	42	4	0	0	0	1	0
2338	58	18	10	18_10	F	10	7	43517	18	43640	1	28	32	52	43	8	1	0	0	1	0
2339	58	18	10	18_10	F	10	7	43517	19	43647	1	37	37	49	46	2	1	0	0	1	0
2340	58	18	10	18_10	F	10	7	43517	20	43654	1	36	40	35	31	4	0	0	0	1	0
2341	58	18	10	18_10	F	10	7	43517	21	43661	1	24	35	27	27	0	0	0	0	1	0
2342	58	18	10	18_10	F	10	7	43517	22	43668	1	24	24	28	28	0	0	0	0	1	0
2343	58	18	10	18_10	F	10	7	43517	23	43675	1	21	40	29	26	3	0	0	0	1	0
2344	58	18	10	18_10	F	10	7	43517	24	43682	1	23	31	27	25	2	0	0	0	1	0
2345	58	18	10	18_10	F	10	7	43517	25	43689	1	23	21	23	23	0	0	0	0	1	0
2346	58	18	10	18_10	F	10	7	43517	26	43696	1	23	2	23	22	1	0	0	0	0	1
2347	58	18	10	18_10	F	10	7	43517	27	43703	1	24	0	22	21	1	0	0	0	0
2348	58	18	10	18_10	F	10	7	43517	28	43710	1	35	0	15	15	0	0	0	0	0
2349	58	18	10	18_10	F	10	7	43517	29	43717	1	39	0	11	11	0	0	0	0	0
2350	58	18	10	18_10	F	10	7	43517	30	43724	1	44	0	7	5	2	0	0	0	0
2351	58	18	10	18_10	F	10	7	43517	31	43731	1	40	0	2	2	0	0	0	0	0
2721	58	48	12	48_12	C	10	11	43483	1	43486	0	10	0	0	0	0	0	0	0	1	0
2722	58	48	12	48_12	C	10	11	43483	2	43493	0	10	0	0	0	0	0	0	0	1	0
2723	58	48	12	48_12	C	10	11	43483	3	43500	1	9	0	2	2	0	0	0	1	1	0
2724	58	48	12	48_12	C	10	11	43483	4	43507	1	15	5	3	3	0	0	0	0	1	0
2725	58	48	12	48_12	C	10	11	43483	5	43514	1	13	5	0	0	0	0	0	0	1	0
2726	58	48	12	48_12	C	10	11	43483	6	43521	1	11	7	1	1	0	0	0	0	1	0
2727	58	48	12	48_12	C	10	11	43483	7	43528	1	9	8	1	1	0	0	0	0	1	0
2728	58	48	12	48_12	C	10	11	43483	8	43535	1	8	5	4	4	0	0	0	2	1	0
2729	58	48	12	48_12	C	10	11	43483	9	43542	1	10	15	6	6	0	0	0	0	1	0
2730	58	48	12	48_12	C	10	11	43483	10	43549	1	10	8	8	8	0	0	0	0	1	0
2731	58	48	12	48_12	C	10	11	43483	11	43556	1	13	14	4	4	0	0	0	0	1	0
2732	58	48	12	48_12	C	10	11	43483	12	43563	1	16	17	10	10	0	0	0	0	1	0
2733	58	48	12	48_12	C	10	11	43483	13	43570	1	12	16	16	16	0	0	0	0	1	0
2734	58	48	12	48_12	C	10	11	43483	14	43577	1	17	28	11	10	0	1	0	0	1	0
2735	58	48	12	48_12	C	10	11	43483	15	43584	1	18	24	17	17	0	0	0	0	1	0
2736	58	48	12	48_12	C	10	11	43483	16	43591	1	19	26	15	14	1	0	0	0	1	0
2737	58	48	12	48_12	C	10	11	43483	17	43598	1	19	27	22	22	0	0	0	0	1	0
2738	58	48	12	48_12	C	10	11	43483	18	43605	1	15	40	27	26	1	0	0	0	1	0
2739	58	48	12	48_12	C	10	11	43483	19	43612	1	24	45	22	21	0	1	0	0	1	0
2740	58	48	12	48_12	C	10	11	43483	20	43619	1	26	27	23	22	1	0	0	0	1	0
2741	58	48	12	48_12	C	10	11	43483	21	43626	1	16	32	30	24	4	2	0	0	1	0
2742	58	48	12	48_12	C	10	11	43483	22	43633	1	20	4	20	20	0	0	0	0	1	0
2743	58	48	12	48_12	C	10	11	43483	23	43640	1	18	0	41	39	2	0	0	0	1	0
2744	58	48	12	48_12	C	10	11	43483	24	43647	1	33	0	49	48	1	0	0	0	1	0
2745	58	48	12	48_12	C	10	11	43483	25	43654	1	53	0	44	44	0	0	0	0	0	1
2746	58	48	12	48_12	C	10	11	43483	26	43661	1	73	0	20	20	0	0	0	0	0
3361	66	41	5	41_5	F	10	14	43481	1	43486	0	10	0	0	0	0	0	0	0	1	0
3362	66	41	5	41_5	F	10	14	43481	2	43493	0	10	0	0	0	0	0	0	0	1	0
3363	66	41	5	41_5	F	10	14	43481	3	43500	1	13	0	0	0	0	0	0	0	1	0
3364	66	41	5	41_5	F	10	14	43481	4	43507	1	13	8	3	3	0	0	0	0	1	0
3365	66	41	5	41_5	F	10	14	43481	5	43514	1	12	8	2	2	0	0	0	0	1	0
3366	66	41	5	41_5	F	10	14	43481	6	43521	1	11	13	9	9	0	0	0	0	1	0
3367	66	41	5	41_5	F	10	14	43481	7	43528	1	13	17	15	15	0	0	0	0	1	0
3368	66	41	5	41_5	F	10	14	43481	8	43535	1	18	26	14	14	0	0	0	0	1	0
3369	66	41	5	41_5	F	10	14	43481	9	43542	1	19	36	26	26	0	0	0	0	1	0
3370	66	41	5	41_5	F	10	14	43481	10	43549	1	22	35	20	20	0	0	0	0	1	0
3371	66	41	5	41_5	F	10	14	43481	11	43556	1	20	41	12	10	0	0	2	0	1	0
3372	66	41	5	41_5	F	10	14	43481	12	43563	1	17	29	18	15	3	0	0	0	1	0
3373	66	41	5	41_5	F	10	14	43481	13	43570	1	12	30	43	43	0	0	0	0	1	0
3374	66	41	5	41_5	F	10	14	43481	14	43577	1	26	42	61	57	0	4	0	0	1	0
3375	66	41	5	41_5	F	10	14	43481	15	43584	1	40	45	39	39	0	0	0	0	1	0
3376	66	41	5	41_5	F	10	14	43481	16	43591	1	38	37	48	48	0	0	0	0	1	0
3377	66	41	5	41_5	F	10	14	43481	17	43598	1	40	32	61	61	0	0	0	0	1	0
3378	66	41	5	41_5	F	10	14	43481	18	43605	1	40	20	87	73	6	8	0	0	1	0
3379	66	41	5	41_5	F	10	14	43481	19	43612	1	65	10	61	53	5	3	0	0	1	0
3380	66	41	5	41_5	F	10	14	43481	20	43619	1	36	5	49	44	2	3	1	0	1	0
3381	66	41	5	41_5	F	10	14	43481	21	43626	1	36	13	36	32	1	3	0	0	1	0
3382	66	41	5	41_5	F	10	14	43481	22	43633	1	26	4	22	22	0	0	0	0	0	1
3383	66	41	5	41_5	F	10	14	43481	23	43640	1	35	0	12	11	1	0	0	0	0
3384	66	41	5	41_5	F	10	14	43481	24	43647	1	32	0	8	8	0	0	0	0	0
3385	66	41	5	41_5	F	10	14	43481	25	43654	1	47	0	2	1	1	0	0	0	0
3386	66	41	5	41_5	F	10	14	43481	26	43661	1	49	0	3	3	0	0	0	0	0
3441	66	41	6	41_6	C	10	3	43481	1	43486	0	10	0	0	0	0	0	0	0	1	0
3442	66	41	6	41_6	C	10	3	43481	2	43493	0	10	0	0	0	0	0	0	0	1	0
3443	66	41	6	41_6	C	10	3	43481	3	43500	1	9	0	0	0	0	0	0	1	1	0
3444	66	41	6	41_6	C	10	3	43481	4	43507	1	13	8	3	3	0	0	0	0	1	0
3445	66	41	6	41_6	C	10	3	43481	5	43514	1	13	7	0	0	0	0	0	0	1	0
3446	66	41	6	41_6	C	10	3	43481	6	43521	1	10	9	1	1	0	0	0	0	1	0
3447	66	41	6	41_6	C	10	3	43481	7	43528	1	8	13	2	2	0	0	0	2	1	0
3448	66	41	6	41_6	C	10	3	43481	8	43535	1	11	23	7	7	0	0	0	0	1	0
3449	66	41	6	41_6	C	10	3	43481	9	43542	1	13	23	9	9	0	0	0	0	1	0
3450	66	41	6	41_6	C	10	3	43481	10	43549	1	11	20	8	8	0	0	0	0	1	0
3451	66	41	6	41_6	C	10	3	43481	11	43556	1	15	14	10	10	0	0	0	0	1	0
3452	66	41	6	41_6	C	10	3	43481	12	43563	1	15	21	9	8	0	1	0	0	1	0
3453	66	41	6	41_6	C	10	3	43481	13	43570	1	15	19	11	8	3	0	0	0	1	0
3454	66	41	6	41_6	C	10	3	43481	14	43577	1	14	20	12	12	0	0	0	0	1	0
3455	66	41	6	41_6	C	10	3	43481	15	43584	1	14	24	13	13	0	0	0	0	1	0
3456	66	41	6	41_6	C	10	3	43481	16	43591	1	12	16	22	19	3	0	0	0	1	0
3457	66	41	6	41_6	C	10	3	43481	17	43598	1	17	14	20	18	0	2	0	0	1	0
3458	66	41	6	41_6	C	10	3	43481	18	43605	1	23	27	22	21	0	1	0	0	1	0
3459	66	41	6	41_6	C	10	3	43481	19	43612	1	23	12	25	22	3	0	0	0	1	0
3460	66	41	6	41_6	C	10	3	43481	20	43619	1	19	42	22	20	2	0	0	0	1	0
3461	66	41	6	41_6	C	10	3	43481	21	43626	1	21	16	17	15	2	0	0	0	1	0
3462	66	41	6	41_6	C	10	3	43481	22	43633	1	29	5	26	22	3	1	0	0	0	1
3463	66	41	6	41_6	C	10	3	43481	23	43640	1	37	0	33	28	5	0	0	0	0
3464	66	41	6	41_6	C	10	3	43481	24	43647	1	48	0	38	35	3	0	0	0	0
3465	66	41	6	41_6	C	10	3	43481	25	43654	1	57	0	33	32	1	0	0	0	0
3466	66	41	6	41_6	C	10	3	43481	26	43661	1	62	0	9	9	0	0	0	0	0
3681	66	41	13	41_13	C	10	20	43522	1	43528	0	10	0	3	3	0	0	0	0	1	0
3682	66	41	13	41_13	C	10	20	43522	2	43535	0	9	4	6	6	0	0	0	1	1	0
3683	66	41	13	41_13	C	10	20	43522	3	43542	1	11	9	6	6	0	0	0	0	1	0
3684	66	41	13	41_13	C	10	20	43522	4	43549	1	12	6	3	3	0	0	0	0	1	0
3685	66	41	13	41_13	C	10	20	43522	5	43556	1	14	6	0	0	0	0	0	0	1	0
3686	66	41	13	41_13	C	10	20	43522	6	43563	1	9	11	3	3	0	0	0	0	1	0
3687	66	41	13	41_13	C	10	20	43522	7	43570	1	10	12	9	9	0	0	0	0	1	0
3688	66	41	13	41_13	C	10	20	43522	8	43577	1	11	19	11	11	0	0	0	0	1	0
3689	66	41	13	41_13	C	10	20	43522	9	43584	1	6	16	10	10	0	0	0	0	1	0
3690	66	41	13	41_13	C	10	20	43522	10	43591	1	19	20	18	18	0	0	0	0	1	0
3691	66	41	13	41_13	C	10	20	43522	11	43598	1	16	20	29	26	1	2	0	0	1	0
3692	66	41	13	41_13	C	10	20	43522	12	43605	1	23	26	38	36	1	1	0	0	1	0
3693	66	41	13	41_13	C	10	20	43522	13	43612	1	30	20	39	34	5	0	0	0	1	0
3694	66	41	13	41_13	C	10	20	43522	14	43619	1	22	12	33	27	6	0	0	0	1	0
3695	66	41	13	41_13	C	10	20	43522	15	43626	1	28	0	50	45	5	0	0	0	0	1
3696	66	41	13	41_13	C	10	20	43522	16	43633	1	41	0	48	46	2	0	0	0	0
3697	66	41	13	41_13	C	10	20	43522	17	43640	1	66	0	35	31	4	0	0	0	0
3698	66	41	13	41_13	C	10	20	43522	18	43647	1	84	0	16	16	0	0	0	0	0
5441	61	41	3	41_3	F	10	4	43488	1	43495	0	10	0	0	0	0	0	0	0	1	0
5442	61	41	3	41_3	F	10	4	43488	2	43502	1	12	0	0	0	0	0	0	0	1	0
5443	61	41	3	41_3	F	10	4	43488	3	43509	1	11	8	0	0	0	0	0	0	1	0
5444	61	41	3	41_3	F	10	4	43488	4	43516	1	12	5	0	0	0	0	0	0	1	0
5445	61	41	3	41_3	F	10	4	43488	5	43523	1	10	6	2	2	0	0	0	0	1	0
5446	61	41	3	41_3	F	10	4	43488	6	43530	1	10	5	8	8	0	0	0	0	1	0
5447	61	41	3	41_3	F	10	4	43488	7	43537	1	13	1	8	8	0	0	0	0	1	0
5448	61	41	3	41_3	F	10	4	43488	8	43544	1	14	0	8	8	0	0	0	0	1	0
5449	61	41	3	41_3	F	10	4	43488	9	43551	1	17	0	9	9	0	0	0	0	1	0
5450	61	41	3	41_3	F	10	4	43488	10	43558	1	12	8	6	6	0	0	0	0	1	0
5451	61	41	3	41_3	F	10	4	43488	11	43565	1	17	10	2	2	0	0	0	0	1	0
5452	61	41	3	41_3	F	10	4	43488	12	43572	1	10	7	1	1	0	0	0	0	1	0
5453	61	41	3	41_3	F	10	4	43488	13	43579	1	10	8	0	0	0	0	0	0	1	0
5454	61	41	3	41_3	F	10	4	43488	14	43586	1	11	8	3	3	0	0	0	0	1	0
5455	61	41	3	41_3	F	10	4	43488	15	43593	1	8	10	10	10	0	0	0	1	1	0
5456	61	41	3	41_3	F	10	4	43488	16	43600	1	13	9	10	10	0	0	0	0	1	0
5457	61	41	3	41_3	F	10	4	43488	17	43607	1	15	16	9	8	0	1	0	0	1	0
5458	61	41	3	41_3	F	10	4	43488	18	43614	1	15	23	10	10	0	0	0	0	1	0
5459	61	41	3	41_3	F	10	4	43488	19	43621	1	14	15	12	12	0	0	0	0	1	0
5460	61	41	3	41_3	F	10	4	43488	20	43628	1	14	21	12	10	1	1	0	0	1	0
5461	61	41	3	41_3	F	10	4	43488	21	43635	1	17	29	17	12	4	1	0	0	1	0
5462	61	41	3	41_3	F	10	4	43488	22	43642	1	15	27	19	17	2	0	0	0	1	0
5463	61	41	3	41_3	F	10	4	43488	23	43649	1	16	28	23	21	1	1	0	0	1	0
5464	61	41	3	41_3	F	10	4	43488	24	43656	1	21	31	33	28	5	0	0	0	1	0
5465	61	41	3	41_3	F	10	4	43488	25	43663	1	21	22	32	32	0	0	0	0	1	0
5466	61	41	3	41_3	F	10	4	43488	26	43670	1	30	3	30	29	1	0	0	0	0	1
5467	61	41	3	41_3	F	10	4	43488	27	43677	1	39	0	38	31	7	0	0	0	0
5468	61	41	3	41_3	F	10	4	43488	28	43684	1	46	0	35	34	1	0	0	0	0
5469	61	41	3	41_3	F	10	4	43488	29	43691	1	56	0	27	24	3	0	0	0	0
5470	61	41	3	41_3	F	10	4	43488	30	43698	1	70	0	14	14	0	0	0	0	0
6321	60	48	18	48_18	C	10	5	43490	1	43495	0	10	0	0	0	0	0	0	0	1	0
6322	60	48	18	48_18	C	10	5	43490	2	43502	0	11	0	4	4	0	0	0	0	1	0
6323	60	48	18	48_18	C	10	5	43490	3	43509	0	9	1	5	5	0	0	0	0	1	0
6324	60	48	18	48_18	C	10	5	43490	4	43516	1	9	5	2	2	0	0	0	1	1	0
6325	60	48	18	48_18	C	10	5	43490	5	43523	1	10	5	0	0	0	0	0	0	1	0
6326	60	48	18	48_18	C	10	5	43490	6	43530	1	9	6	0	0	0	0	0	0	1	0
6327	60	48	18	48_18	C	10	5	43490	7	43537	1	8	15	4	4	0	0	0	2	1	0
6328	60	48	18	48_18	C	10	5	43490	8	43544	1	10	19	8	8	0	0	0	0	1	0
6329	60	48	18	48_18	C	10	5	43490	9	43551	1	14	16	9	9	0	0	0	0	1	0
6330	60	48	18	48_18	C	10	5	43490	10	43558	1	15	10	13	13	0	0	0	0	1	0
6331	60	48	18	48_18	C	10	5	43490	11	43565	1	15	19	23	23	0	0	0	0	1	0
6332	60	48	18	48_18	C	10	5	43490	12	43572	1	20	9	34	33	0	1	0	0	1	0
6333	60	48	18	48_18	C	10	5	43490	13	43579	1	24	2	36	30	5	1	0	0	1	0
6334	60	48	18	48_18	C	10	5	43490	14	43586	1	28	3	35	32	3	0	0	0	1	0
6335	60	48	18	48_18	C	10	5	43490	15	43593	1	32	3	27	22	5	0	0	0	1	0
6336	60	48	18	48_18	C	10	5	43490	16	43600	1	26	2	18	13	5	0	0	0	1	0
6337	60	48	18	48_18	C	10	5	43490	17	43607	1	21	2	8	6	2	0	0	0	1	0
6338	60	48	18	48_18	C	10	5	43490	18	43614	1	15	1	5	5	0	0	0	0	1	0
6339	60	48	18	48_18	C	10	5	43490	19	43621	1	12	1	4	4	0	0	0	0	1	0
6340	60	48	18	48_18	C	10	5	43490	20	43628	1	14	4	3	3	0	0	0	0	1	0
6341	60	48	18	48_18	C	10	5	43490	21	43635	1	11	11	2	2	0	0	0	0	1	0
6342	60	48	18	48_18	C	10	5	43490	22	43642	1	12	13	2	2	0	0	0	0	1	0
6343	60	48	18	48_18	C	10	5	43490	23	43649	1	11	14	1	1	0	0	0	0	1	0
6344	60	48	18	48_18	C	10	5	43490	24	43656	1	10	15	5	5	0	0	0	0	1	0
6345	60	48	18	48_18	C	10	5	43490	25	43663	1	12	14	13	13	0	0	0	0	1	0
6346	60	48	18	48_18	C	10	5	43490	26	43670	1	14	24	22	22	0	0	0	0	1	0
6347	60	48	18	48_18	C	10	5	43490	27	43677	1	19	19	24	24	0	0	0	0	1	0
6348	60	48	18	48_18	C	10	5	43490	28	43684	1	21	17	27	26	1	0	0	0	1	0
6349	60	48	18	48_18	C	10	5	43490	29	43691	1	24	8	36	30	4	2	0	0	1	0
6350	60	48	18	48_18	C	10	5	43490	30	43698	1	24	0	36	29	6	1	0	0	0	1
6351	60	48	18	48_18	C	10	5	43490	31	43705	1	41	0	30	25	4	1	0	0	0
6352	60	48	18	48_18	C	10	5	43490	32	43712	1	48	0	31	27	4	0	0	0	0
6353	60	48	18	48_18	C	10	5	43490	33	43719	1	54	0	12	11	1	0	0	0	0
6354	60	48	18	48_18	C	10	5	43490	34	43726	1	59	0	5	5	0	0	0	0	0
6641	60	48	12	48_12	F	10	8	43628	1	43635	1	9	0	0	0	0	0	0	0	1	0
6642	60	48	12	48_12	F	10	8	43628	2	43642	1	9	5	3	3	0	0	0	0	1	0
6643	60	48	12	48_12	F	10	8	43628	3	43649	1	9	5	3	3	0	0	0	0	1	0
6644	60	48	12	48_12	F	10	8	43628	4	43656	1	11	4	0	0	0	0	0	0	1	0
6645	60	48	12	48_12	F	10	8	43628	5	43663	1	10	8	1	1	0	0	0	0	1	0
6646	60	48	12	48_12	F	10	8	43628	6	43670	1	9	13	5	5	0	0	0	0	1	0
6647	60	48	12	48_12	F	10	8	43628	7	43677	1	11	15	7	7	0	0	0	0	1	0
6648	60	48	12	48_12	F	10	8	43628	8	43684	1	13	16	10	10	0	0	0	0	1	0
6649	60	48	12	48_12	F	10	8	43628	9	43691	1	12	20	15	15	0	0	0	0	1	0
6650	60	48	12	48_12	F	10	8	43628	10	43698	1	16	25	11	11	0	0	0	0	1	0
6651	60	48	12	48_12	F	10	8	43628	11	43705	1	16	14	17	15	2	0	0	0	1	0
6652	60	48	12	48_12	F	10	8	43628	12	43712	1	11	18	17	16	1	0	0	0	1	0
6653	60	48	12	48_12	F	10	8	43628	13	43719	1	22	6	21	14	7	0	0	0	1	0
6654	60	48	12	48_12	F	10	8	43628	14	43726	1	12	19	19	19	0	0	0	0	1	0
6655	60	48	12	48_12	F	10	8	43628	15	43733	1	24	36	26	25	1	0	0	0	1	0
6656	60	48	12	48_12	F	10	8	43628	16	43740	1	17	34	32	29	1	2	0	0	1	0
6657	60	48	12	48_12	F	10	8	43628	17	43747	1	26	37	27	24	2	1	0	0	1	0
6658	60	48	12	48_12	F	10	8	43628	18	43754	1	17	27	19	16	3	0	0	0	1	0
6659	60	48	12	48_12	F	10	8	43628	19	43761	1	22	27	19	18	1	0	0	0	1	0
6660	60	48	12	48_12	F	10	8	43628	20	43768	1	14	30	22	19	2	1	0	0	1	0
6661	60	48	12	48_12	F	10	8	43628	21	43775	1	19	28	25	24	1	0	0	0	1	0
6662	60	48	12	48_12	F	10	8	43628	22	43782	1	23	20	23	22	0	1	0	0	1	0
6663	60	48	12	48_12	F	10	8	43628	23	43789	1	20	16	42	19	23	0	0	0	0	1
6664	60	48	12	48_12	F	10	8	43628	24	43796	1	29	1	31	27	4	0	0	0	0
6665	60	48	12	48_12	F	10	8	43628	25	43803	1	35	0	26	25	0	1	0	0	0
6666	60	48	12	48_12	F	10	8	43628	26	43810	1	44	0	18	13	5	0	0	0	0
6667	60	48	12	48_12	F	10	8	43628	27	43817	1	47	0	6	6	0	0	0	0	0
6668	60	48	12	48_12	F	10	8	43628	28	43822	1	50	0	7	7	0	0	0	0	0
7121	60	34	13	34_13	C	10	12	43509	1	43516	1	11	3	3	3	0	0	0	0	1	0
7122	60	34	13	34_13	C	10	12	43509	2	43523	1	11	6	0	0	0	0	0	0	1	0
7123	60	34	13	34_13	C	10	12	43509	3	43530	1	11	5	0	0	0	0	0	0	1	0
7124	60	34	13	34_13	C	10	12	43509	4	43537	1	10	7	0	0	0	0	0	0	1	0
7125	60	34	13	34_13	C	10	12	43509	5	43544	1	11	12	0	0	0	0	0	0	1	0
7126	60	34	13	34_13	C	10	12	43509	6	43551	1	10	17	5	5	0	0	0	0	1	0
7127	60	34	13	34_13	C	10	12	43509	7	43558	1	9	16	8	8	0	0	0	0	1	0
7128	60	34	13	34_13	C	10	12	43509	8	43565	1	11	17	12	12	0	0	0	0	1	0
7129	60	34	13	34_13	C	10	12	43509	9	43572	1	12	30	14	14	0	0	0	0	1	0
7130	60	34	13	34_13	C	10	12	43509	10	43579	1	18	27	24	22	1	1	0	0	1	0
7131	60	34	13	34_13	C	10	12	43509	11	43586	1	19	32	28	26	0	2	0	0	1	0
7132	60	34	13	34_13	C	10	12	43509	12	43593	1	22	30	25	23	1	1	0	0	1	0
7133	60	34	13	34_13	C	10	12	43509	13	43600	1	19	21	24	22	2	0	0	0	1	0
7134	60	34	13	34_13	C	10	12	43509	14	43607	1	20	33	38	32	6	0	0	0	1	0
7135	60	34	13	34_13	C	10	12	43509	15	43614	1	28	46	42	40	1	1	0	0	1	0
7136	60	34	13	34_13	C	10	12	43509	16	43621	1	21	25	47	44	3	0	0	0	1	0
7137	60	34	13	34_13	C	10	12	43509	17	43628	1	38	1	38	33	3	2	0	0	1	0
7138	60	34	13	34_13	C	10	12	43509	18	43635	1	24	0	36	34	1	1	0	0	0	1
7139	60	34	13	34_13	C	10	12	43509	19	43642	1	39	0	49	46	3	0	0	0	0
7140	60	34	13	34_13	C	10	12	43509	20	43649	1	42	0	33	32	1	0	0	0	0
7141	60	34	13	34_13	C	10	12	43509	21	43656	1	56	0	13	13	0	0	0	0	0
7201	60	34	8	34_8	C	10	1	43509	1	43516	0	9	0	2	2	0	0	0	1	1	0
7202	60	34	8	34_8	C	10	1	43509	2	43523	1	10	3	1	1	0	0	0	0	1	0
7203	60	34	8	34_8	C	10	1	43509	3	43530	1	10	5	1	1	0	0	0	0	1	0
7204	60	34	8	34_8	C	10	1	43509	4	43537	1	9	10	1	1	0	0	0	1	1	0
7205	60	34	8	34_8	C	10	1	43509	5	43544	1	10	5	2	2	0	0	0	0	1	0
7206	60	34	8	34_8	C	10	1	43509	6	43551	1	10	7	4	4	0	0	0	0	1	0
7207	60	34	8	34_8	C	10	1	43509	7	43558	1	11	8	8	8	0	0	0	0	1	0
7208	60	34	8	34_8	C	10	1	43509	8	43565	1	10	13	12	12	0	0	0	0	1	0
7209	60	34	8	34_8	C	10	1	43509	9	43572	1	16	9	12	12	0	0	0	0	1	0
7210	60	34	8	34_8	C	10	1	43509	10	43579	1	14	9	16	16	0	0	0	0	1	0
7211	60	34	8	34_8	C	10	1	43509	11	43586	1	18	9	19	18	1	0	0	0	1	0
7212	60	34	8	34_8	C	10	1	43509	12	43593	1	20	7	21	15	4	2	0	0	1	0
7213	60	34	8	34_8	C	10	1	43509	13	43600	1	17	3	16	16	0	0	0	0	1	0
7214	60	34	8	34_8	C	10	1	43509	14	43607	1	18	2	16	12	2	2	0	0	1	0
7215	60	34	8	34_8	C	10	1	43509	15	43614	1	20	2	9	7	2	0	0	0	1	0
7216	60	34	8	34_8	C	10	1	43509	16	43621	1	12	4	8	7	1	0	0	0	1	0
7217	60	34	8	34_8	C	10	1	43509	17	43628	1	16	5	6	6	0	0	0	0	1	0
7218	60	34	8	34_8	C	10	1	43509	18	43635	1	13	7	5	5	0	0	0	0	1	0
7219	60	34	8	34_8	C	10	1	43509	19	43642	1	13	10	2	2	0	0	0	0	1	0
7220	60	34	8	34_8	C	10	1	43509	20	43649	1	10	14	4	3	0	1	0	0	1	0
7221	60	34	8	34_8	C	10	1	43509	21	43656	1	11	6	10	10	0	0	0	0	1	0
7222	60	34	8	34_8	C	10	1	43509	22	43663	1	14	14	14	14	0	0	0	0	1	0
7223	60	34	8	34_8	C	10	1	43509	23	43670	1	17	11	16	16	0	0	0	0	1	0
7224	60	34	8	34_8	C	10	1	43509	24	43677	1	19	14	20	17	1	2	0	0	1	0
7225	60	34	8	34_8	C	10	1	43509	25	43684	1	19	12	17	14	3	0	0	0	1	0
7226	60	34	8	34_8	C	10	1	43509	26	43691	1	18	7	22	15	6	1	0	0	1	0
7227	60	34	8	34_8	C	10	1	43509	27	43698	1	17	3	24	14	8	2	0	0	1	0
7228	60	34	8	34_8	C	10	1	43509	28	43705	1	29	3	15	3	11	1	0	0	1	0
7229	60	34	8	34_8	C	10	1	43509	29	43712	1	13	5	10	1	6	3	0	0	1	0
7230	60	34	8	34_8	C	10	1	43509	30	43719	1	11	4	8	0	7	1	0	0	1	0
7231	60	34	8	34_8	C	10	1	43509	31	43726	1	9	1	2	0	2	0	0	0	1	0
7232	60	34	8	34_8	C	10	1	43509	32	43733	1	9	3	3	0	2	1	0	0	1	0
7233	60	34	8	34_8	C	10	1	43509	33	43740	1	10	7	4	0	4	0	0	0	1	0
7234	60	34	8	34_8	C	10	1	43509	34	43747	1	10	3	0	0	0	0	0	0	1	0
7235	60	34	8	34_8	C	10	1	43509	35	43754	1	10	6	2	1	1	0	0	0	1	0
7236	60	34	8	34_8	C	10	1	43509	36	43761	1	9	6	5	5	0	0	0	0	1	0
7237	60	34	8	34_8	C	10	1	43509	37	43768	1	10	4	10	8	1	1	0	0	1	0
7238	60	34	8	34_8	C	10	1	43509	38	43775	1	12	1	5	4	1	0	0	0	1	0
7239	60	34	8	34_8	C	10	1	43509	39	43782	1	10	0	3	3	0	0	0	0	0	1
7240	60	34	8	34_8	C	10	1	43509	40	43789	1	10	0	10	7	2	1	0	0	0
7241	60	34	8	34_8	C	10	1	43509	41	43796	1	12	0	7	6	1	0	0	0	0
7242	60	34	8	34_8	C	10	1	43509	42	43803	1	16	0	5	5	0	0	0	0	0
8161	67	18	5	18_5	F	10	10	43531	1	43537	0	16	0	0	0	0	0	0	0	1	0
8162	67	18	5	18_5	F	10	10	43531	2	43544	1	16	3	1	1	0	0	0	0	1	0
8163	67	18	5	18_5	F	10	10	43531	3	43551	1	14	5	0	0	0	0	0	0	1	0
8164	67	18	5	18_5	F	10	10	43531	4	43558	1	10	3	0	0	0	0	0	0	1	0
8165	67	18	5	18_5	F	10	10	43531	5	43565	1	10	6	0	0	0	0	0	0	1	0
8166	67	18	5	18_5	F	10	10	43531	6	43572	1	10	9	3	3	0	0	0	0	1	0
8167	67	18	5	18_5	F	10	10	43531	7	43579	1	9	7	7	7	0	0	0	0	1	0
8168	67	18	5	18_5	F	10	10	43531	8	43586	1	12	10	6	6	0	0	0	0	1	0
8169	67	18	5	18_5	F	10	10	43531	9	43593	1	14	13	9	9	0	0	0	0	1	0
8170	67	18	5	18_5	F	10	10	43531	10	43600	1	12	12	8	8	0	0	0	0	1	0
8171	67	18	5	18_5	F	10	10	43531	11	43607	1	13	9	5	5	0	0	0	0	1	0
8172	67	18	5	18_5	F	10	10	43531	12	43614	1	11	12	7	6	1	0	0	0	1	0
8173	67	18	5	18_5	F	10	10	43531	13	43621	1	15	11	11	8	3	0	0	0	1	0
8174	67	18	5	18_5	F	10	10	43531	14	43628	1	12	14	18	14	3	1	0	0	1	0
8175	67	18	5	18_5	F	10	10	43531	15	43635	1	15	6	12	10	1	1	0	0	1	0
8176	67	18	5	18_5	F	10	10	43531	16	43642	1	17	7	8	8	0	0	0	0	1	0
8177	67	18	5	18_5	F	10	10	43531	17	43649	1	15	9	18	14	3	1	0	0	1	0
8178	67	18	5	18_5	F	10	10	43531	18	43656	1	16	8	15	13	2	0	0	0	1	0
8179	67	18	5	18_5	F	10	10	43531	19	43663	1	16	9	12	11	0	1	0	0	1	0
8180	67	18	5	18_5	F	10	10	43531	20	43670	1	17	9	8	8	0	0	0	0	1	0
8181	67	18	5	18_5	F	10	10	43531	21	43677	1	15	8	4	4	0	0	0	0	1	0
8182	67	18	5	18_5	F	10	10	43531	22	43684	1	9	6	3	3	0	0	0	0	1	0
8183	67	18	5	18_5	F	10	10	43531	23	43691	1	9	10	4	4	0	0	0	0	1	0
8184	67	18	5	18_5	F	10	10	43531	24	43698	1	11	13	5	3	1	1	0	0	1	0
8185	67	18	5	18_5	F	10	10	43531	25	43705	1	10	16	6	6	0	0	0	0	1	0
8186	67	18	5	18_5	F	10	10	43531	26	43712	1	12	16	10	10	0	0	0	0	1	0
8187	67	18	5	18_5	F	10	10	43531	27	43719	1	17	22	11	10	1	0	0	0	1	0
8188	67	18	5	18_5	F	10	10	43531	28	43726	1	13	16	12	12	0	0	0	0	1	0
8189	67	18	5	18_5	F	10	10	43531	29	43733	1	13	11	12	10	2	0	0	0	1	0
8190	67	18	5	18_5	F	10	10	43531	30	43740	1	17	20	21	17	4	0	0	0	1	0
8191	67	18	5	18_5	F	10	10	43531	31	43747	1	18	16	21	21	0	0	0	0	1	0
8192	67	18	5	18_5	F	10	10	43531	32	43754	1	20	15	17	16	1	0	0	0	1	0
8193	67	18	5	18_5	F	10	10	43531	33	43761	1	23	9	18	12	4	2	0	0	1	0
8194	67	18	5	18_5	F	10	10	43531	34	43768	1	16	8	16	9	6	1	0	0	1	0
8195	67	18	5	18_5	F	10	10	43531	35	43775	1		0			0				0	1
8196	67	18	5	18_5	F	10	10	43531	36	43782	1	17	0	9	4	5	0	0	0	0
8197	67	18	5	18_5	F	10	10	43531	37	43789	1	18	0	4	1	3	0	0		0
8198	67	18	5	18_5	F	10	10	43531	38	43796	1	17	0	2	1	1	0	0	0	0
8199	67	18	5	18_5	F	10	10	43531	39	43803	1	17	0	0	0	0	0	0	0	0
9841	63	48	3	48_3	C	10	19	43650	1	43658	0	10	0	0	0	0	0	0	0	1	0
9842	63	48	3	48_3	C	10	19	43650	2	43665	1	12	2	0	0	0	0	0	0	1	0
9843	63	48	3	48_3	C	10	19	43650	3	43672	1	11	4	3	1	0	0	0	0	1	0
9844	63	48	3	48_3	C	10	19	43650	4	43679	1	10	6	1	1	0	0	0	0	1	0
9845	63	48	3	48_3	C	10	19	43650	5	43686	1	11	6	1	1	0	0	0	0	1	0
9846	63	48	3	48_3	C	10	19	43650	6	43693	1	11	8	1	1	0	0	0	0	1	0
9847	63	48	3	48_3	C	10	19	43650	7	43700	1	10	8	5	5	0	0	0	0	1	0
9848	63	48	3	48_3	C	10	19	43650	8	43707	1	10	13	2	2	0	0	0	0	1	0
9849	63	48	3	48_3	C	10	19	43650	9	43714	1	11	11	3	3	0	0	0	0	1	0
9850	63	48	3	48_3	C	10	19	43650	10	43721	1	13	16	5	4	1	0	0	0	1	0
9851	63	48	3	48_3	C	10	19	43650	11	43728	1	10	20	8	8	0	0	0	0	1	0
9852	63	48	3	48_3	C	10	19	43650	12	43735	1	11	18	13	12	1	0	0	0	1	0
9853	63	48	3	48_3	C	10	19	43650	13	43742	1	17	18	11	10	1	0	0	0	1	0
9854	63	48	3	48_3	C	10	19	43650	14	43749	1	11	23	9	9	0	0	0	0	1	0
9855	63	48	3	48_3	C	10	19	43650	15	43756	1	13	27	16	15	1	0	0	0	1	0
9856	63	48	3	48_3	C	10	19	43650	16	43763	1	15	25	15	14	1	0	0	0	1	0
9857	63	48	3	48_3	C	10	19	43650	17	43770	1	15	16	19	16	3	0	0	0	1	0
9858	63	48	3	48_3	C	10	19	43650	18	43777	1	17	25	19	17	1	1	0	0	1	0
9859	63	48	3	48_3	C	10	19	43650	19	43784	1	17	22	17	15	1	1	0	0	1	0
9860	63	48	3	48_3	C	10	19	43650	20	43791	1	15	23	14	14	0	0	0	0	1	0
9861	63	48	3	48_3	C	10	19	43650	21	43798	1	15	24	25	14	11	0	0	0	1	0
9862	63	48	3	48_3	C	10	19	43650	22	43805	1	19	27	26	24	2	0	0	0	1	0
9863	63	48	3	48_3	C	10	19	43650	23	43812	1	16	22	24	23	1	0	0	0	1	0
9864	63	48	3	48_3	C	10	19	43650	24	43819	1	24	18	22	21	1	0	0	0	1	0
9865	63	48	3	48_3	C	10	19	43650	25	43822	1	15	14	21	21	0	0	0	0	1	0
9867	63	48	3	48_3	C	10	19	43650	27	43840	1	29	10	19	15	4	0	0	0	1	0
9868	63	48	3	48_3	C	10	19	43650	28	43847	1	18	19	18	15	3	0	0	0	1	0
9869	63	48	3	48_3	C	10	19	43650	29	43854	1	23	8	8	8	0	0	0	0	1	0
9870	63	48	3	48_3	C	10	19	43650	30	43861	1	10	0	10	10	0	0	0	0	1	0
9871	63	48	3	48_3	C	10	19	43650	31	43868	1	16	0	9	8	1	0	0	0	0	1
9872	63	48	3	48_3	C	10	19	43650	32	43875	1	18	0	10	8	1	1	0	0	0
9873	63	48	3	48_3	C	10	19	43650	33	43882	1	22	0	6	6	0	0	0	0	0
10241	64	34	9	34_9	C	10	25	43532	1	43539	0	9	0	0	0	0	0	0	2	1	0
10242	64	34	9	34_9	C	10	25	43532	2	43546	0	9	5	3	3	0	0	0	0	1	0
10243	64	34	9	34_9	C	10	25	43532	3	43553	1	11	7	5	5	0	0	0	0	1	0
10244	64	34	9	34_9	C	10	25	43532	4	43560	1	11	6	3	3	0	0	0	0	1	0
10245	64	34	9	34_9	C	10	25	43532	5	43567	1	12	8	0	0	0	0	0	0	1	0
10246	64	34	9	34_9	C	10	25	43532	6	43574	1	10	11	5	5	0	0	0	0	1	0
10247	64	34	9	34_9	C	10	25	43532	7	43581	1	9	8	8	8	0	0	0	0	1	0
10248	64	34	9	34_9	C	10	25	43532	8	43588	1	15	17	8	8	0	0	0	0	1	0
10249	64	34	9	34_9	C	10	25	43532	9	43595	1	15	15	4	4	0	0	0	0	1	0
10250	64	34	9	34_9	C	10	25	43532	10	43602	1	13	13	7	7	0	0	0	0	1	0
10251	64	34	9	34_9	C	10	25	43532	11	43609	1	12	3	11	11	0	0	0	0	1	0
10252	64	34	9	34_9	C	10	25	43532	12	43616	1	14	5	18	17	1	0	0	0	1	0
10253	64	34	9	34_9	C	10	25	43532	13	43623	1	17	5	12	12	0	0	0	0	1	0
10254	64	34	9	34_9	C	10	25	43532	14	43630	1	20	7	5	4	1	0	0	0	1	0
10255	64	34	9	34_9	C	10	25	43532	15	43637	1	12	9	3	2	1	0	0	0	1	0
10256	64	34	9	34_9	C	10	25	43532	16	43644	1	10	9	3	3	0	0	0	0	1	0
10257	64	34	9	34_9	C	10	25	43532	17	43651	1	9	10	3	3	0	0	0	1	1	0
10258	64	34	9	34_9	C	10	25	43532	18	43658	1	10	13	3	3	0	0	0	0	1	0
10259	64	34	9	34_9	C	10	25	43532	19	43665	1	12	15	4	4	0	0	0	0	1	0
10260	64	34	9	34_9	C	10	25	43532	20	43672	1	11	18	9	9	0	0	0	0	1	0
10261	64	34	9	34_9	C	10	25	43532	21	43679	1	11	22	12	12	0	0	0	0	1	0
10262	64	34	9	34_9	C	10	25	43532	22	43686	1	17	14	15	15	0	0	0	0	1	0
10263	64	34	9	34_9	C	10	25	43532	23	43693	1	15	13	17	17	0	0	0	0	1	0
10264	64	34	9	34_9	C	10	25	43532	24	43700	1	16	17	16	14	1	1	0	0	1	0
10265	64	34	9	34_9	C	10	25	43532	25	43707	1	14	14	23	19	4	0	0	0	1	0
10266	64	34	9	34_9	C	10	25	43532	26	43714	1	15	11	15	9	4	2	0	0	1	0
10267	64	34	9	34_9	C	10	25	43532	27	43721	1	18	11	11	6	3	2	0	0	1	0
10268	64	34	9	34_9	C	10	25	43532	28	43728	1	10	17	7	7	0	0	0	0	1	0
10269	64	34	9	34_9	C	10	25	43532	29	43735	1	13	23	19	15	3	1	0	0	1	0
10270	64	34	9	34_9	C	10	25	43532	30	43742	1	15	19	21	19	1	1	0	0	1	0
10271	64	34	9	34_9	C	10	25	43532	31	43749	1	18	15	20	19	1	0	0	0	1	0
10272	64	34	9	34_9	C	10	25	43532	32	43756	1	18	10	14	12	2	0	0	0	1	0
10273	64	34	9	34_9	C	10	25	43532	33	43763	1	27	6	8	4	4	0	0	0	1	0
10274	64	34	9	34_9	C	10	25	43532	34	43770	1	13	8	11	2	8	1	0	0	1	0
10275	64	34	9	34_9	C	10	25	43532	35	43777	1	11	1	4	0	4	0	0	0	0	1
10276	64	34	9	34_9	C	10	25	43532	36	43784	1	10	0	5	1	3	1	0	0	0
10277	64	34	9	34_9	C	10	25	43532	37	43791	1	9	0	1	1	0	0	0	0	0
10278	64	34	9	34_9	C	10	25	43532	38	43798	1	9	0	2	0	2	0	0	0	0
10321	64	34	2	34_2	C	10	22	43532	1	43539	0	8	0	0	0	0	0	0	2	1	0
10322	64	34	2	34_2	C	10	22	43532	2	43546	0	9	3	4	4	0	0	0	0	1	0
10323	64	34	2	34_2	C	10	22	43532	3	43553	0	10	0	1	1	0	0	0	0	1	0
10324	64	34	2	34_2	C	10	22	43532	4	43560	1	11	7	0	0	0	0	0	0	1	0
10325	64	34	2	34_2	C	10	22	43532	5	43567	1	9	10	0	0	0	0	0	1	1	0
10326	64	34	2	34_2	C	10	22	43532	6	43574	1	9	10	2	2	0	0	0	0	1	0
10327	64	34	2	34_2	C	10	22	43532	7	43581	1	8	9	2	2	0	0	0	0	1	0
10328	64	34	2	34_2	C	10	22	43532	8	43588	1	9	16	5	5	0	0	0	1	1	0
10329	64	34	2	34_2	C	10	22	43532	9	43595	1	11	19	7	7	0	0	0	0	1	0
10330	64	34	2	34_2	C	10	22	43532	10	43602	1	15	19	5	5	0	0	0	0	1	0
10331	64	34	2	34_2	C	10	22	43532	11	43609	1	10	19	11	11	0	0	0	0	1	0
10332	64	34	2	34_2	C	10	22	43532	12	43616	1	12	5	14	10	4	0	0	0	1	0
10333	64	34	2	34_2	C	10	22	43532	13	43623	1	17	7	10	10	0	0	0	0	1	0
10334	64	34	2	34_2	C	10	22	43532	14	43630	1	15	6	16	14	1	1	0	0	1	0
10335	64	34	2	34_2	C	10	22	43532	15	43637	1	14	2	15	13	2	0	0	0	1	0
10336	64	34	2	34_2	C	10	22	43532	16	43644	1	15	3	8	7	1	0	0	0	1	0
10337	64	34	2	34_2	C	10	22	43532	17	43651	1	15	2	5	4	1	0	0	0	1	0
10338	64	34	2	34_2	C	10	22	43532	18	43658	1	12	4	5	4	1	0	0	0	1	0
10339	64	34	2	34_2	C	10	22	43532	19	43665	1	13	3	0	0	0	0	0	0	1	0
10340	64	34	2	34_2	C	10	22	43532	20	43672	1	6	6	0	0	0	0	0	4	1	0
10341	64	34	2	34_2	C	10	22	43532	21	43679	1	8	5	0	0	0	0	0	2	1	0
10342	64	34	2	34_2	C	10	22	43532	22	43686	1	10	7	0	0	0	0	0	0	1	0
10343	64	34	2	34_2	C	10	22	43532	23	43693	1	9	7	1	1	0	0	0	1	1	0
10344	64	34	2	34_2	C	10	22	43532	24	43700	1	10	4	0	0	0	0	0	0	1	0
10345	64	34	2	34_2	C	10	22	43532	25	43707	1	10	5	1	1	0	0	0	0	1	0
10346	64	34	2	34_2	C	10	22	43532	26	43714	1	9	5	3	3	0	0	0	0	1	0
10347	64	34	2	34_2	C	10	22	43532	27	43721	1	11	4	3	3	0	0	0	0	1	0
10348	64	34	2	34_2	C	10	22	43532	28	43728	1	10	1	2	2	0	0	0	0	1	0
10349	64	34	2	34_2	C	10	22	43532	29	43735	1	10	3	2	2	0	0	0	0	1	0
10350	64	34	2	34_2	C	10	22	43532	30	43742	1	12	2	3	3	0	0	0	0	1	0
10351	64	34	2	34_2	C	10	22	43532	31	43749	1	13	0	1	0	1	0	0	0	0	1
10352	64	34	2	34_2	C	10	22	43532	32	43756	1	11	0	1	1	0	0	0	0	0
10353	64	34	2	34_2	C	10	22	43532	33	43763	1	9	0	2	2	0	0	0	0	0
10354	64	34	2	34_2	C	10	22	43532	34	43770	1	8	0	6	5	1	0	0	0	0
10561	64	41	4	41_4	C	10	28	43508	1	43518	1	10	3	0	0	0	0	0	0	1	0
10562	64	41	4	41_4	C	10	28	43508	2	43525	1	10	11	2	2	0	0	0	0	1	0
10563	64	41	4	41_4	C	10	28	43508	3	43532	1	10	3	1	1	0	0	0	0	1	0
10564	64	41	4	41_4	C	10	28	43508	4	43539	1	11	5	0	0	0	0	0	0	1	0
10565	64	41	4	41_4	C	10	28	43508	5	43546	1	10	14	4	4	0	0	0	0	1	0
10566	64	41	4	41_4	C	10	28	43508	6	43553	1	8	7	8	8	0	0	0	1	1	0
10567	64	41	4	41_4	C	10	28	43508	7	43560	1	13	12	8	8	0	0	0	0	1	0
10568	64	41	4	41_4	C	10	28	43508	8	43567	1	13	23	10	10	0	0	0	0	1	0
10569	64	41	4	41_4	C	10	28	43508	9	43574	1	15	30	24	23	0	1	0	0	1	0
10570	64	41	4	41_4	C	10	28	43508	10	43581	1	17	30	19	17	2	0	1	0	1	0
10571	64	41	4	41_4	C	10	28	43508	11	43588	1	24	13	18	18	0	0	0	0	1	0
10572	64	41	4	41_4	C	10	28	43508	12	43595	1	20	7	34	30	2	2	0	0	1	0
10573	64	41	4	41_4	C	10	28	43508	13	43602	1	28	5	47	45	2	0	0	0	1	0
10574	64	41	4	41_4	C	10	28	43508	14	43609	1	27	8	46	39	7	0	0	0	1	0
10575	64	41	4	41_4	C	10	28	43508	15	43616	1	40	7	31	28	0	3	0	0	1	0
10576	64	41	4	41_4	C	10	28	43508	16	43623	1	29	9	19	16	3	0	0	0	1	0
10577	64	41	4	41_4	C	10	28	43508	17	43630	1	20	12	19	17	1	1	0	0	1	0
10578	64	41	4	41_4	C	10	28	43508	18	43637	1	26	11	14	14	0	0	0	0	1	0
10579	64	41	4	41_4	C	10	28	43508	19	43644	1	18	12	6	5	1	0	0	0	1	0
10580	64	41	4	41_4	C	10	28	43508	20	43651	1	14	16	7	7	0	0	0	0	1	0
10581	64	41	4	41_4	C	10	28	43508	21	43658	1	18	22	12	12	0	0	0	0	1	0
10582	64	41	4	41_4	C	10	28	43508	22	43665	1	17	29	25	17	8	0	0	0	1	0
10583	64	41	4	41_4	C	10	28	43508	23	43672	1	18	32	21	17	4	0	0	0	1	0
10584	64	41	4	41_4	C	10	28	43508	24	43679	1	11	22	22	21	0	1	0	0	1	0
10585	64	41	4	41_4	C	10	28	43508	25	43686	1	21	26	27	22	4	1	0	0	1	0
10586	64	41	4	41_4	C	10	28	43508	26	43693	1	23	18	19	17	2	0	0	0	1	0
10587	64	41	4	41_4	C	10	28	43508	27	43700	1	22	21	20	18	2	0	0	0	1	0
10588	64	41	4	41_4	C	10	28	43508	28	43707	1	14	17	30	24	5	1	0	0	1	0
10589	64	41	4	41_4	C	10	28	43508	29	43714	1	19	14	35	31	3	1	0	0	1	0
10590	64	41	4	41_4	C	10	28	43508	30	43721	1	29	21	33	27	5	1	0	0	1	0
10591	64	41	4	41_4	C	10	28	43508	31	43728	1	24	32	14	8	6	0	0	0	1	0
10592	64	41	4	41_4	C	10	28	43508	32	43735	1	20	23	14	2	12	0	0	0	1	0
10593	64	41	4	41_4	C	10	28	43508	33	43742	1	11	13	15	1	14	0	0	0	1	0
10594	64	41	4	41_4	C	10	28	43508	34	43749	1	10	5	7	1	6	0	0	0	1	0
10595	64	41	4	41_4	C	10	28	43508	35	43756	1	10	4	5	2	3	0	0	0	1	0
10596	64	41	4	41_4	C	10	28	43508	36	43763	1	11	3	6	1	5	0	0	0	1	0
10597	64	41	4	41_4	C	10	28	43508	37	43770	1	11	4	1	1	0	0	0	0	0	1
10598	64	41	4	41_4	C	10	28	43508	38	43777	1	9	0	4	1	3	0	0	0	0
10599	64	41	4	41_4	C	10	28	43508	39	43784	1	8	0	1	1	0	0	0	0	0
10641	64	48	17	48_17	C	10	15	43510	1	43518	0	10	0	3	3	0	0	0	0	1	0
10642	64	48	17	48_17	C	10	15	43510	2	43525	1	10	6	4	4	0	0	0	0	1	0
10643	64	48	17	48_17	C	10	15	43510	3	43532	1	13	3	1	1	0	0	0	0	1	0
10644	64	48	17	48_17	C	10	15	43510	4	43539	1	10	7	0	0	0	0	0	0	1	0
10645	64	48	17	48_17	C	10	15	43510	5	43546	1	8	8	3	3	0	0	0	2	1	0
10646	64	48	17	48_17	C	10	15	43510	6	43553	1	9	16	6	6	0	0	0	0	1	0
10647	64	48	17	48_17	C	10	15	43510	7	43560	1	14	25	3	3	0	0	0	0	1	0
10648	64	48	17	48_17	C	10	15	43510	8	43567	1	11	27	3	3	0	0	0	0	1	0
10649	64	48	17	48_17	C	10	15	43510	9	43574	1	12	17	11	11	0	0	0	0	1	0
10650	64	48	17	48_17	C	10	15	43510	10	43581	1	10	36	18	17	1	0	0	0	1	0
10651	64	48	17	48_17	C	10	15	43510	11	43588	1	17	29	11	11	0	0	0	0	1	0
10652	64	48	17	48_17	C	10	15	43510	12	43595	1	16	31	15	14	1	0	0	0	1	0
10653	64	48	17	48_17	C	10	15	43510	13	43602	1	13	41	26	21	4	1	0	0	1	0
10654	64	48	17	48_17	C	10	15	43510	14	43609	1	21	44	31	29	2	0	0	0	1	0
10655	64	48	17	48_17	C	10	15	43510	15	43616	1	20	44	25	25	0	0	0	0	1	0
10656	64	48	17	48_17	C	10	15	43510	16	43623	1	24	28	24	18	6	0	0	0	1	0
10657	64	48	17	48_17	C	10	15	43510	17	43630	1	18	33	31	21	10	0	0	0	1	0
10658	64	48	17	48_17	C	10	15	43510	18	43637	1	21	40	32	29	1	2	0	0	1	0
10659	64	48	17	48_17	C	10	15	43510	19	43644	1	24	12	49	40	8	1	0	0	1	0
10660	64	48	17	48_17	C	10	15	43510	20	43651	1	22	0	43	36	7	0	0	0	1	0
10661	64	48	17	48_17	C	10	15	43510	21	43658	1	36	0	32	29	3	0	0	0	0	1
10662	64	48	17	48_17	C	10	15	43510	22	43665	1	49	0	28	28	0	0	0	0	0
10663	64	48	17	48_17	C	10	15	43510	23	43672	1	59	0	27	27	0	0	0	0	0
10664	64	48	17	48_17	C	10	15	43510	24	43679	1	72	0	14	14	0	0	0	0	0
10881	64	48	20	48_20	C	10	4	43580	1	43588	0	10	0	4	3	0	1	0	0	1	0
10882	64	48	20	48_20	C	10	4	43580	2	43595	0	11	0	3	3	0	0	0	0	1	0
10883	64	48	20	48_20	C	10	4	43580	3	43602	1	10	4	3	3	0	0	0	0	1	0
10884	64	48	20	48_20	C	10	4	43580	4	43609	1	7	5	3	3	0	0	0	3	1	0
10885	64	48	20	48_20	C	10	4	43580	5	43616	1	10	7	1	1	0	0	0	0	1	0
10886	64	48	20	48_20	C	10	4	43580	6	43623	1	9	10	0	0	0	0	0	0	1	0
10887	64	48	20	48_20	C	10	4	43580	7	43630	1	11	12	1	1	0	0	0	0	1	0
10888	64	48	20	48_20	C	10	4	43580	8	43637	1	10	13	2	2	0	0	0	0	1	0
10889	64	48	20	48_20	C	10	4	43580	9	43644	1	10	16	2	2	0	0	0	0	1	0
10890	64	48	20	48_20	C	10	4	43580	10	43651	1	12	19	2	2	0	0	0	0	1	0
10891	64	48	20	48_20	C	10	4	43580	11	43658	1	11	11	3	3	0	0	0	0	1	0
10892	64	48	20	48_20	C	10	4	43580	12	43665	1	10	12	1	1	0	0	0	0	1	0
10893	64	48	20	48_20	C	10	4	43580	13	43672	1	7	0	2	2	0	0	0	0	0	1
10894	64	48	20	48_20	C	10	4	43580	14	43679	1	7	0	3	3	0	0	0	0	0
10895	64	48	20	48_20	C	10	4	43580	15	43686	1	8	0	5	5	0	0	0	0	0
10896	64	48	20	48_20	C	10	4	43580	16	43693	1	10	0	6	3	3	0	0	0	0
10897	64	48	20	48_20	C	10	4	43580	17	43700	1	10	0	2	2	0	0	0	0	0
10898	64	48	20	48_20	C	10	4	43580	18	43707	1	6	0	0	0	0	0	0	0	0
11521	65	48	7	48_7	C	10	21	43560	1	43567	0	9	0	2	2	0	0	0	0	1	0
11522	65	48	7	48_7	C	10	21	43560	2	43574	1	9	2	1	1	0	0	0	1	1	0
11523	65	48	7	48_7	C	10	21	43560	3	43581	1	8	2	2	2	0	0	0	2	1	0
11524	65	48	7	48_7	C	10	21	43560	4	43588	1	13	2	0	0	0	0	0	0	1	0
11525	65	48	7	48_7	C	10	21	43560	5	43595	1	11	2	0	0	0	0	0	0	1	0
11526	65	48	7	48_7	C	10	21	43560	6	43602	1	10	2	0	0	0	0	0	0	1	0
11527	65	48	7	48_7	C	10	21	43560	7	43609	1	10	1	0	0	0	0	0	0	1	0
11528	65	48	7	48_7	C	10	21	43560	8	43616	1	10	6	0	0	0	0	0	0	1	0
11529	65	48	7	48_7	C	10	21	43560	9	43623	1	8	8	0	0	0	0	0	0	1	0
11530	65	48	7	48_7	C	10	21	43560	10	43630	1	9	5	0	0	0	0	0	1	1	0
11531	65	48	7	48_7	C	10	21	43560	11	43637	1	11	5	0	0	0	0	0	0	1	0
11532	65	48	7	48_7	C	10	21	43560	12	43644	1	10	12	0	0	0	0	0	0	1	0
11533	65	48	7	48_7	C	10	21	43560	13	43651	1	9	8	0	0	0	0	0	0	1	0
11534	65	48	7	48_7	C	10	21	43560	14	43658	1	9	7	0	0	0	0	0	0	1	0
11535	65	48	7	48_7	C	10	21	43560	15	43665	1	8	3	0	0	0	0	0	2	1	0
11536	65	48	7	48_7	C	10	21	43560	16	43672	1	10	6	0	0	0	0	0	0	1	0
11537	65	48	7	48_7	C	10	21	43560	17	43679	1	8	6	2	0	0	2	0	0	1	0
11538	65	48	7	48_7	C	10	21	43560	18	43686	1	7	0	0	0	0	0	0	0	0	1
11601	65	48	10	48_10	C	10	26	43517	1	43525	0	10	0	3	3	0	0	0	0	1	0
11602	65	48	10	48_10	C	10	26	43517	2	43532		9	1	4	4	0	0	0	0	1	0
11603	65	48	10	48_10	C	10	26	43517	3	43539	1	11	8	4	4	0	0	0	0	1	0
11604	65	48	10	48_10	C	10	26	43517	4	43546	1	10	10	3	3	0	0	0	0	1	0
11605	65	48	10	48_10	C	10	26	43517	5	43553	1	13	10	2	2	0	0	0	0	1	0
11606	65	48	10	48_10	C	10	26	43517	6	43560	1	9	10	5	5	0	0	0	0	1	0
11607	65	48	10	48_10	C	10	26	43517	7	43567	1	10	21	15	15	0	0	0	0	1	0
11608	65	48	10	48_10	C	10	26	43517	8	43574	1	12	19	18	18	0	0	0	0	1	0
11609	65	48	10	48_10	C	10	26	43517	9	43581	1	17	33	19	19	0	0	0	0	1	0
11610	65	48	10	48_10	C	10	26	43517	10	43588	1	18	22	24	24	0	0	0	0	1	0
11611	65	48	10	48_10	C	10	26	43517	11	43595	1	18	33	33	28	4	1	0	0	1	0
11612	65	48	10	48_10	C	10	26	43517	12	43602	1	29	40	47	41	6	0	0	0	1	0
11613	65	48	10	48_10	C	10	26	43517	13	43609	1	26	38	47	43	3	1	0	0	1	0
11614	65	48	10	48_10	C	10	26	43517	14	43616	1	29	9	48	44	4	0	0	0	0	1
	63	48	3	48_3	C	10	19b	43532	1	43539	0	11	0	2	2	0	0	0	0	1	0
	63	48	3	48_3	C	10	19b	43532	2	43546	1	10	7	7	7	0	0	0	0	1	0
	63	48	3	48_3	C	10	19b	43532	3	43553	1	13	5	0	0	0	0	0	0	1	0
	63	48	3	48_3	C	10	19b	43532	4	43560	1	13	7	0	0	0	0	0	0	1	0
	63	48	3	48_3	C	10	19b	43532	5	43567	1	10	10	1	1	0	0	0	0	1	0
	63	48	3	48_3	C	10	19b	43532	6	43574	1	9	13	6	6	0	0	0	0	1	0
	63	48	3	48_3	C	10	19b	43532	7	43581	1	10	10	9	9	0	0	0	0	1	0
	63	48	3	48_3	C	10	19b	43532	8	43588	1	16	16	12	12	0	0	0	0	1	0
	63	48	3	48_3	C	10	19b	43532	9	43595	1	10	20	15	15	0	0	0	0	1	0
	63	48	3	48_3	C	10	19b	43532	10	43602	1	21	25	11	9	0	2	0	0	1	0
	63	48	3	48_3	C	10	19b	43532	11	43609	1	11	9	12	9	3	0	0	0	1	0
	63	48	3	48_3	C	10	19b	43532	12	43616	1	18	5	16	15	1	0	0	0	0	1
	63	48	3	48_3	C	10	19b	43532	13	43623	1	11	0	7	6	1	0	0	0	0
	63	48	3	48_3	C	10	19b	43532	14	43630	1	9	0	0	0	0	0	0	0	0
1761	58	18	3	18_3	B	20	10	43570	1	43577	1	19	0	0	0	0	0	0	0	1	0
1762	58	18	3	18_3	B	20	10	43570	2	43584	1	18	5	0	0	0	0	0	2	1	0
1763	58	18	3	18_3	B	20	10	43570	3	43591	1	19	4	0	0	0	0	0	1	1	0
1764	58	18	3	18_3	B	20	10	43570	4	43598	1	17	4	0	0	0	0	0	3	1	0
1765	58	18	3	18_3	B	20	10	43570	5	43605	1	21	6	0	0	0	0	0	0	1	0
1766	58	18	3	18_3	B	20	10	43570	6	43612	1	22	6	0	0	0	0	0	0	1	0
1767	58	18	3	18_3	B	20	10	43570	7	43619	1	19	7	3	3	0	0	0	0	1	0
1768	58	18	3	18_3	B	20	10	43570	8	43626	1	17	13	7	6	0	1	0	3	1	0
1769	58	18	3	18_3	B	20	10	43570	9	43633	1	23	11	5	4	0	1	0	0	1	0
1770	58	18	3	18_3	B	20	10	43570	10	43640	1	20	10	4	4	0	0	0	0	1	0
1771	58	18	3	18_3	B	20	10	43570	11	43647	1	21	4	5	5	0	0	0	0	1	0
1772	58	18	3	18_3	B	20	10	43570	12	43654	1	19	6	9	8	0	1	0	0	1	0
1773	58	18	3	18_3	B	20	10	43570	13	43661	1	19	7	11	9	2	0	0	0	1	0
1774	58	18	3	18_3	B	20	10	43570	14	43668	1	17	5	7	6	1	0	0	0	1	0
1775	58	18	3	18_3	B	20	10	43570	15	43675	1	20	10	3	3	0	0	0	0	1	0
1776	58	18	3	18_3	B	20	10	43570	16	43682	1	21	9	1	1	0	0	0	0	1	0
1777	58	18	3	18_3	B	20	10	43570	17	43689	1	22	10	1	1	0	0	0	0	1	0
1778	58	18	3	18_3	B	20	10	43570	18	43696	1	18	12	1	1	0	0	0	2	1	0
1779	58	18	3	18_3	B	20	10	43570	19	43703	1	20	8	4	4	0	0	0	0	1	0
1780	58	18	3	18_3	B	20	10	43570	20	43710	1	19	8	6	6	0	0	0	0	1	0
1781	58	18	3	18_3	B	20	10	43570	21	43717	1	17	13	8	8	0	0	0	3	1	0
1782	58	18	3	18_3	B	20	10	43570	22	43724	1	17	15	10	10	0	0	0	0	1	0
1783	58	18	3	18_3	B	20	10	43570	23	43731	1	20	14	6	6	0	0	0	0	1	0
1784	58	18	3	18_3	B	20	10	43570	24	43738	1	23	15	5	5	0	0	0	0	1	0
1785	58	18	3	18_3	B	20	10	43570	25	43745	1	20	14	14	11	3	0	0	0	1	0
1786	58	18	3	18_3	B	20	10	43570	26	43752	1	19	15	11	10	1	0	0	0	1	0
1787	58	18	3	18_3	B	20	10	43570	27	43759	1	28	10	9	4	4	1	0	0	1	0
1788	58	18	3	18_3	B	20	10	43570	28	43766	1	19	11	10	6	4	0	0	0	1	0
1789	58	18	3	18_3	B	20	10	43570	29	43773	1	20	12	7	4	3	0	0	0	1	0
1790	58	18	3	18_3	B	20	10	43570	30	43780	1	19	7	10	1	8	1	0	1	1	0
1791	58	18	3	18_3	B	20	10	43570	31	43787	1	18	4	1	0	1	0	0	0	1	0
1792	58	18	3	18_3	B	20	10	43570	32	43794	1	15	1	1	0	1	0	0	5	1	0
1793	58	18	3	18_3	B	20	10	43570	33	43801	1	16	0	2	0	2	0	0	0	0	1
1794	58	18	3	18_3	B	20	10	43570	34	43808	1	14	0	3	0	2	1	0	0	0
1795	58	18	3	18_3	B	20	10	43570	35	43815	1	12	0	1	0	1	0	0	0	0
1921	58	18	5	18_5	E	20	10	43517	1	43521	0	20	0	0	0	0	0	0	0	1	0
1922	58	18	5	18_5	E	20	10	43517	2	43528	0	20	0	0	0	0	0	0	0	1	0
1923	58	18	5	18_5	E	20	10	43517	3	43535	0	24	8	0	0	0	0	0	0	1	0
1924	58	18	5	18_5	E	20	10	43517	4	43542	1	19	8	4	4	0	0	0	1	1	0
1925	58	18	5	18_5	E	20	10	43517	5	43549	1	18	5	5	5	0	0	0	0	1	0
1926	58	18	5	18_5	E	20	10	43517	6	43556	1	20	10	4	4	0	0	0	0	1	0
1927	58	18	5	18_5	E	20	10	43517	7	43563	1	18	9	6	6	0	0	0	0	1	0
1928	58	18	5	18_5	E	20	10	43517	8	43570	1	21	15	7	7	0	0	0	0	1	0
1929	58	18	5	18_5	E	20	10	43517	9	43577	1	23	10	8	8	0	0	0	0	1	0
1930	58	18	5	18_5	E	20	10	43517	10	43584	1	26	19	8	7	1	0	0	0	1	0
1931	58	18	5	18_5	E	20	10	43517	11	43591	1	22	17	10	9	0	1	0	0	1	0
1932	58	18	5	18_5	E	20	10	43517	12	43598	1	25	9	14	13	1	0	0	0	1	0
1933	58	18	5	18_5	E	20	10	43517	13	43605	1	23	4	21	18	3	0	0	0	1	0
1934	58	18	5	18_5	E	20	10	43517	14	43612	1	29	2	10	9	0	1	0	0	1	0
1935	58	18	5	18_5	E	20	10	43517	15	43619	1	31	6	7	4	2	1	0	0	1	0
1936	58	18	5	18_5	E	20	10	43517	16	43626	1	22	8	4	4	0	0	0	0	1	0
1937	58	18	5	18_5	E	20	10	43517	17	43633	1	21	8	5	3	2	0	0	0	1	0
1938	58	18	5	18_5	E	20	10	43517	18	43640	1	18	4	2	2	0	0	0	0	1	0
1939	58	18	5	18_5	E	20	10	43517	19	43647	1	18	8	4	3	1	0	0	0	1	0
1940	58	18	5	18_5	E	20	10	43517	20	43654	1	19	12	7	7	0	0	0	0	1	0
1941	58	18	5	18_5	E	20	10	43517	21	43661	1	21	13	8	7	1	0	0	0	1	0
1942	58	18	5	18_5	E	20	10	43517	22	43668	1	20	13	5	5	0	0	0	0	1	0
1943	58	18	5	18_5	E	20	10	43517	23	43675	1	23	15	7	6	1	0	0	0	1	0
1944	58	18	5	18_5	E	20	10	43517	24	43682	1	23	12	9	7	1	1	0	0	1	0
1945	58	18	5	18_5	E	20	10	43517	25	43689	1	22	10	1	1	0	0	0	0	1	0
1946	58	18	5	18_5	E	20	10	43517	26	43696	1	26	14	10	5	4	1	0	0	1	0
1947	58	18	5	18_5	E	20	10	43517	27	43703	1	23	9	11	5	6	0	0	0	1	0
1948	58	18	5	18_5	E	20	10	43517	28	43710	1	23	9	8	2	5	1	0	0	1	0
1949	58	18	5	18_5	E	20	10	43517	29	43717	1	17	10	6	5	0	0	1	3	1	0
1950	58	18	5	18_5	E	20	10	43517	30	43724	1	17	9	10	0	10	0	0	4	1	0
1951	58	18	5	18_5	E	20	10	43517	31	43731	1	16	7	11	1	9	1	0	4	1	0
1952	58	18	5	18_5	E	20	10	43517	32	43738	1	21	2	12	2	9	1	0	0	0	1
1953	58	18	5	18_5	E	20	10	43517	33	43745	1	19	0	5	1	4	0	0	0	0
1954	58	18	5	18_5	E	20	10	43517	34	43752	1	20	0	4	0	4	0	0	0	0
1955	58	18	5	18_5	E	20	10	43517	35	43759	1	18	0	2	0	2	0	0	0	0
1956	58	18	5	18_5	E	20	10	43517	36	43766	1	19	0	3	0	3	0	0	0	0
2081	58	18	7	18_7	B	20	11	43482	1	43486	0	20	0	0	0	0	0	0	0	1	0
2082	58	18	7	18_7	B	20	11	43482	2	43493	0	20	0	0	0	0	0	0	0	1	0
2083	58	18	7	18_7	B	20	11	43482	3	43500	0	19	0	0	0	0	0	0	1	1	0
2084	58	18	7	18_7	B	20	11	43482	4	43507	0	17	2	6	6	0	0	0	3	1	0
2085	58	18	7	18_7	B	20	11	43482	5	43514	1	21	8	4	4	0	0	0	0	1	0
2086	58	18	7	18_7	B	20	11	43482	6	43521	1	24	12	3	3	0	0	0	0	1	0
2087	58	18	7	18_7	B	20	11	43482	7	43528	1	21	11	0	0	0	0	0	0	1	0
2088	58	18	7	18_7	B	20	11	43482	8	43535	1	20	11	0	0	0	0	0	0	1	0
2089	58	18	7	18_7	B	20	11	43482	9	43542	1	20	14	3	3	0	0	0	0	1	0
2090	58	18	7	18_7	B	20	11	43482	10	43549	1	19	4	5	5	0	0	0	0	1	0
2091	58	18	7	18_7	B	20	11	43482	11	43556	1	22	13	6	6	0	0	0	0	1	0
2092	58	18	7	18_7	B	20	11	43482	12	43563	1	20	6	10	10	0	0	0	0	1	0
2093	58	18	7	18_7	B	20	11	43482	13	43570	1	28	11	13	12	1	0	0	0	1	0
2094	58	18	7	18_7	B	20	11	43482	14	43577	1	24	13	11	10	1	0	0	0	1	0
2095	58	18	7	18_7	B	20	11	43482	15	43584	1	21	19	7	5	2	0	0	0	1	0
2096	58	18	7	18_7	B	20	11	43482	16	43591	1	26	14	5	5	0	0	0	0	1	0
2097	58	18	7	18_7	B	20	11	43482	17	43598	1	22	16	8	7	1	0	0	0	1	0
2098	58	18	7	18_7	B	20	11	43482	18	43605	1	24	13	13	13	0	0	0	0	1	0
2099	58	18	7	18_7	B	20	11	43482	19	43612	1	22	14	18	17	0	1	0	0	1	0
2100	58	18	7	18_7	B	20	11	43482	20	43619	1	29	11	11	10	0	1	0	0	1	0
2101	58	18	7	18_7	B	20	11	43482	21	43626	1	27	23	11	11	0	0	0	0	1	0
2102	58	18	7	18_7	B	20	11	43482	22	43633	1	21	18	12	11	0	1	0	0	1	0
2103	58	18	7	18_7	B	20	11	43482	23	43640	1	26	24	7	7	0	0	0	0	1	0
2104	58	18	7	18_7	B	20	11	43482	24	43647	1	26	17	12	12	0	0	0	0	1	0
2105	58	18	7	18_7	B	20	11	43482	25	43654	1	22	22	18	16	1	1	0	0	1	0
2106	58	18	7	18_7	B	20	11	43482	26	43661	1	25	16	10	10	0	0	0	0	1	0
2107	58	18	7	18_7	B	20	11	43482	27	43668	1	30	21	10	9	1	0	0	0	1	0
2108	58	18	7	18_7	B	20	11	43482	28	43675	1	23	19	14	12	1	1	0	0	1	0
2109	58	18	7	18_7	B	20	11	43482	29	43682	1	23	18	14	12	2	0	0	0	1	0
2110	58	18	7	18_7	B	20	11	43482	30	43689	1	29	7	16	14	2	0	0	0	1	0
2111	58	18	7	18_7	B	20	11	43482	31	43696	1	34	12	24	18	4	2	0	0	1	0
2112	58	18	7	18_7	B	20	11	43482	32	43703	1	23	9	17	13	4	0	0	0	1	0
2113	58	18	7	18_7	B	20	11	43482	33	43710	1	31	2	15	7	8	0	0	0	1	0
2114	58	18	7	18_7	B	20	11	43482	34	43717	1	19	1	13	4	7	2	0	0	0	1
2115	58	18	7	18_7	B	20	11	43482	35	43724	1	25	0	11	0	10	1	0	0	0
2116	58	18	7	18_7	B	20	11	43482	36	43731	1	22	0	3	0	3	0	0	0	0
2117	58	18	7	18_7	B	20	11	43482	37	43738	1	22	0	4	4	0	0	0	0	0
2401	58	48	8	48_8	B	20	15	43517	1	43521	0	20	0	0	0	0	0	0	0	1	0
2402	58	48	8	48_8	B	20	15	43517	2	43528	0	16	0	2	2	0	0	0	4	1	0
2403	58	48	8	48_8	B	20	15	43517	3	43535	0	22	6	2	2	0	0	0	2	1	0
2404	58	48	8	48_8	B	20	15	43517	4	43542	1	18	6	1	1	0	0	0	2	1	0
2405	58	48	8	48_8	B	20	15	43517	5	43549	1	19	4	1	0	1	0	0	2	1	0
2406	58	48	8	48_8	B	20	15	43517	6	43556	1	19	9	3	3	0	0	0	0	1	0
2407	58	48	8	48_8	B	20	15	43517	7	43563	1	19	6	3	3	0	0	0	0	1	0
2408	58	48	8	48_8	B	20	15	43517	8	43570	1	19	9	5	5	0	0	0	0	1	0
2409	58	48	8	48_8	B	20	15	43517	9	43577	1	20	8	4	4	0	0	0	0	1	0
2410	58	48	8	48_8	B	20	15	43517	10	43584	1	19	7	3	2	0	1	0	0	1	0
2411	58	48	8	48_8	B	20	15	43517	11	43591	1	19	6	2	2	0	0	0	0	1	0
2412	58	48	8	48_8	B	20	15	43517	12	43598	1	21	6	3	3	0	0	0	0	1	0
2413	58	48	8	48_8	B	20	15	43517	13	43605	1	21	9	4	4	0	0	0	0	1	0
2414	58	48	8	48_8	B	20	15	43517	14	43612	1	20	7	4	4	0	0	0	0	1	0
2415	58	48	8	48_8	B	20	15	43517	15	43619	1	22	11	9	9	0	0	0	0	1	0
2416	58	48	8	48_8	B	20	15	43517	16	43626	1	20	9	11	11	0	0	0	0	1	0
2417	58	48	8	48_8	B	20	15	43517	17	43633	1	21	8	11	11	0	0	0	0	1	0
2418	58	48	8	48_8	B	20	15	43517	18	43640	1	24	8	9	9	0	0	0	0	1	0
2419	58	48	8	48_8	B	20	15	43517	19	43647	1	24	8	12	10	1	1	0	0	1	0
2420	58	48	8	48_8	B	20	15	43517	20	43654	1	24	7	15	14	1	0	0	0	1	0
2421	58	48	8	48_8	B	20	15	43517	21	43661	1	23	11	11	10	0	1	0	0	1	0
2422	58	48	8	48_8	B	20	15	43517	22	43668	1	28	7	12	12	0	0	0	0	1	0
2423	58	48	8	48_8	B	20	15	43517	23	43675	1	25	10	7	7	0	0	0	0	1	0
2424	58	48	8	48_8	B	20	15	43517	24	43682	1	27	13	9	7	2	0	0	0	1	0
2425	58	48	8	48_8	B	20	15	43517	25	43689	1	23	10	12	12	0	0	0	0	1	0
2426	58	48	8	48_8	B	20	15	43517	26	43696	1	22	8	13	13	0	0	0	0	1	0
2427	58	48	8	48_8	B	20	15	43517	27	43703	1	25	8	11	10	0	1	0	0	1	0
2428	58	48	8	48_8	B	20	15	43517	28	43710	1	25	12	10	10	0	0	0	0	1	0
2429	58	48	8	48_8	B	20	15	43517	29	43717	1	23	12	9	8	1	0	0	0	1	0
2430	58	48	8	48_8	B	20	15	43517	30	43724	1	28	13	8	8	0	0	0	0	1	0
2431	58	48	8	48_8	B	20	15	43517	31	43731	1	18	6	9	8	1	0	0	0	1	0
2432	58	48	8	48_8	B	20	15	43517	32	43738	1	23	1	7	5	2	0	0	0	0	1
2433	58	48	8	48_8	B	20	15	43517	33	43745	1	24	0	10	6	4	0	0	0	0
2434	58	48	8	48_8	B	20	15	43517	34	43752	1	25	0	10	9	1	0	0	0	0
2435	58	48	8	48_8	B	20	15	43517	35	43759	1	26	0	10	7	3	0	0	0	0
2561	58	48	10	48_10	E	20	4	43483	1	43486	0	20	0	0	0	0	0	0	0	1	0
2562	58	48	10	48_10	E	20	4	43483	2	43493	0	20	0	0	0	0	0	0	0	1	0
2563	58	48	10	48_10	E	20	4	43483	3	43500	0	17	0	4	4	0	0	0	3	1	0
2564	58	48	10	48_10	E	20	4	43483	4	43507	0	27	2	2	2	0	0	0	0	1	0
2565	58	48	10	48_10	E	20	4	43483	5	43514	1	20	8	1	1	0	0	0	0	1	0
2566	58	48	10	48_10	E	20	4	43483	6	43521	1	21	9	3	3	0	0	0	0	1	0
2567	58	48	10	48_10	E	20	4	43483	7	43528	1	20	11	3	3	0	0	0	0	1	0
2568	58	48	10	48_10	E	20	4	43483	8	43535	1	20	15	7	7	0	0	0	0	1	0
2569	58	48	10	48_10	E	20	4	43483	9	43542	1	23	14	8	8	0	0	0	0	1	0
2570	58	48	10	48_10	E	20	4	43483	10	43549	1	25	29	15	15	0	0	0	0	1	0
2571	58	48	10	48_10	E	20	4	43483	11	43556	1	30	30	23	23	0	0	0	0	1	0
2572	58	48	10	48_10	E	20	4	43483	12	43563	1	31	28	28	28	0	0	0	0	1	0
2573	58	48	10	48_10	E	20	4	43483	13	43570	1	33	37	32	26	6	0	0	0	1	0
2574	58	48	10	48_10	E	20	4	43483	14	43577	1	43	38	50	40	9	0	1	0	1	0
2575	58	48	10	48_10	E	20	4	43483	15	43584	1	36	32	58	48	10	0	0	0	1	0
2576	58	48	10	48_10	E	20	4	43483	16	43591	1	52	38	59	49	8	2	0	0	1	0
2577	58	48	10	48_10	E	20	4	43483	17	43598	1	50	33	62	57	5	0	0	0	1	0
2578	58	48	10	48_10	E	20	4	43483	18	43605	1	42	57	58	52	6	0	0	0	1	0
2579	58	48	10	48_10	E	20	4	43483	19	43612	1	56	23	62	53	7	2	0	0	1	0
2580	58	48	10	48_10	E	20	4	43483	20	43619	1	60	28	68	63	4	1	0	0	1	0
2581	58	48	10	48_10	E	20	4	43483	21	43626	1	60	35	71	62	8	1	0	0	1	0
2582	58	48	10	48_10	E	20	4	43483	22	43633	1	54	39	78	65	12	1	0	0	1	0
2583	58	48	10	48_10	E	20	4	43483	23	43640	1	65	43	73	59	13	1	0	0	1	0
2584	58	48	10	48_10	E	20	4	43483	24	43647	1	46	38	60	53	6	1	0	0	1	0
2585	58	48	10	48_10	E	20	4	43483	25	43654	1	45	25	68	51	17	0	0	0	1	0
2586	58	48	10	48_10	E	20	4	43483	26	43661	1	63	27	77	55	19	3	0	0	1	0
2587	58	48	10	48_10	E	20	4	43483	27	43668	1	64	24	68	32	35	1	0	0	1	0
2588	58	48	10	48_10	E	20	4	43483	28	43675	1	36	30	63	33	28	2	0	0	1	0
2589	58	48	10	48_10	E	20	4	43483	29	43682	1	36	25	73	37	34	2	0	0	1	0
2590	58	48	10	48_10	E	20	4	43483	30	43689	1	48	30	43	17	26	0	0	0	1	0
2591	58	48	10	48_10	E	20	4	43483	31	43696	1	24	38	51	19	26	6	0	0	1	0
2592	58	48	10	48_10	E	20	4	43483	32	43703	1	29	24	35	14	21	0	0	0	1	0
2593	58	48	10	48_10	E	20	4	43483	33	43710	1	28	28	37	21	16	0	0	0	1	0
2594	58	48	10	48_10	E	20	4	43483	34	43717	1	24	18	45	45	0	0	0	0	1	0
2595	58	48	10	48_10	E	20	4	43483	35	43724	1	41	8	52	45	7	0	0	0	0	1
2596	58	48	10	48_10	E	20	4	43483	36	43731	1	66	0	40	36	4	0	0	0	0
2597	58	48	10	48_10	E	20	4	43483	37	43738	1	76	0	37	35	1	1	0	0	0
2598	58	48	10	48_10	E	20	4	43483	38	43745	1	75	0	45	27	18	0	0	0	0
2599	58	48	10	48_10	E	20	4	43483	39	43752	1	80	0	16	10	6	0	0	0	0
2801	58	48	13	48_13	B	20	2	43517	1	43521	0	20	0	0	0	0	0	0	0	1	0
2802	58	48	13	48_13	B	20	2	43517	2	43528	0	19	0	1	1	0	0	0	0	1	0
2803	58	48	13	48_13	B	20	2	43517	3	43535	0	16	3	1	1	0	0	0	4	1	0
2804	58	48	13	48_13	B	20	2	43517	4	43542	1	16	5	2	2	0	0	0	4	1	0
2805	58	48	13	48_13	B	20	2	43517	5	43549	1	20	5	0	0	0	0	0	0	1	0
2806	58	48	13	48_13	B	20	2	43517	6	43556	1	16	6	3	3	0	0	0	0	1	0
2807	58	48	13	48_13	B	20	2	43517	7	43563	1	15	9	6	6	0	0	0	4	1	0
2808	58	48	13	48_13	B	20	2	43517	8	43570	1	20	12	12	12	0	0	0	0	1	0
2809	58	48	13	48_13	B	20	2	43517	9	43577	1	24	18	8	8	0	0	0	0	1	0
2810	58	48	13	48_13	B	20	2	43517	10	43584	1	25	19	13	13	0	0	0	0	1	0
2811	58	48	13	48_13	B	20	2	43517	11	43591	1	27	17	16	13	1	2	0	0	1	0
2812	58	48	13	48_13	B	20	2	43517	12	43598	1	25	22	15	15	0	0	0	0	1	0
2813	58	48	13	48_13	B	20	2	43517	13	43605	1	30	22	24	17	6	1	0	0	1	0
2814	58	48	13	48_13	B	20	2	43517	14	43612	1	28	28	20	19	1	0	0	0	1	0
2815	58	48	13	48_13	B	20	2	43517	15	43619	1	32	30	33	26	7	0	0	0	1	0
2816	58	48	13	48_13	B	20	2	43517	16	43626	1	40	38	39	38	0	1	0	0	1	0
2817	58	48	13	48_13	B	20	2	43517	17	43633	1	26	36	53	51	2	0	0	0	1	0
2818	58	48	13	48_13	B	20	2	43517	18	43640	1	45	50	50	42	7	1	0	0	1	0
2819	58	48	13	48_13	B	20	2	43517	19	43647	1	46	30	42	32	9	1	0	0	1	0
2820	58	48	13	48_13	B	20	2	43517	20	43654	1	32	28	60	50	10	0	0	0	1	0
2821	58	48	13	48_13	B	20	2	43517	21	43661	1	41	36	59	52	7	0	0	0	1	0
2822	58	48	13	48_13	B	20	2	43517	22	43668	1	45	32	47	38	9	0	0	0	1	0
2823	58	48	13	48_13	B	20	2	43517	23	43675	1	47	29	56	45	11	0	0	0	1	0
2824	58	48	13	48_13	B	20	2	43517	24	43682	1	38	48	54	54	0	0	0	0	1	0
2825	58	48	13	48_13	B	20	2	43517	25	43689	1	46	43	51	43	8	0	0	0	1	0
2826	58	48	13	48_13	B	20	2	43517	26	43696	1	50	38	48	41	6	1	0	0	1	0
2827	58	48	13	48_13	B	20	2	43517	27	43703	1	39	26	66	50	16	0	0	0	1	0
2828	58	48	13	48_13	B	20	2	43517	28	43710	1	39	20	47	40	7	0	0	0	1	0
2829	58	48	13	48_13	B	20	2	43517	29	43717	1	42	18	53	35	17	1	0	0	1	0
2830	58	48	13	48_13	B	20	2	43517	30	43724	1	50	41	56	33	21	2	0	0	1	0
2831	58	48	13	48_13	B	20	2	43517	31	43731	1	43	36	48	30	13	5	0	0	1	0
2832	58	48	13	48_13	B	20	2	43517	32	43738	1	41	23	41	22	17	2	0	0	1	0
2833	58	48	13	48_13	B	20	2	43517	33	43745	1	22	13	21	9	10	2	0	0	1	0
2834	58	48	13	48_13	B	20	2	43517	34	43752	1	34	4	26	6	18	2	0	0	0	1
2835	58	48	13	48_13	B	20	2	43517	35	43759	1	22	0	22	11	10	1	0	0	0
2836	58	48	13	48_13	B	20	2	43517	36	43766	1	25	0	23	12	10	1	0	0	0
2837	58	48	13	48_13	B	20	2	43517	37	43773	1	32	0	15	12	3	0	0	0	0
2838	58	48	13	48_13	B	20	2	43517	38	43780	1	26	0	13	7	6	0	0	0	0
2881	58	48	14	48_14	B	20	16	43483	1	43486	0	20	0	0	0	0	0	0	0	1	0
2882	58	48	14	48_14	B	20	16	43483	2	43493	0	20	0	0	0	0	0	0	0	1	0
2883	58	48	14	48_14	B	20	16	43483	3	43500	0	20	0	0	0	0	0	0	0	1	0
2884	58	48	14	48_14	B	20	16	43483	4	43507	1	25	4	0	0	0	0	0	0	1	0
2885	58	48	14	48_14	B	20	16	43483	5	43514	1	25	10	0	0	0	0	0	0	1	0
2886	58	48	14	48_14	B	20	16	43483	6	43521	1	20	12	2	2	0	0	0	0	1	0
2887	58	48	14	48_14	B	20	16	43483	7	43528	1	20	15	8	8	0	0	0	0	1	0
2888	58	48	14	48_14	B	20	16	43483	8	43535	1	20	25	9	9	0	0	0	0	1	0
2889	58	48	14	48_14	B	20	16	43483	9	43542	1	25	19	12	12	0	0	0	0	1	0
2890	58	48	14	48_14	B	20	16	43483	10	43549	1	25	19	13	13	0	0	0	0	1	0
2891	58	48	14	48_14	B	20	16	43483	11	43556	1	27	19	13	12	1	0	0	0	1	0
2892	58	48	14	48_14	B	20	16	43483	12	43563	1	21	21	17	2	0	0	0	0	1	0
2893	58	48	14	48_14	B	20	16	43483	13	43570	1	28	30	42	38	4	0	0	0	1	0
2894	58	48	14	48_14	B	20	16	43483	14	43577	1	34	32	36	34	2	0	0	0	1	0
2895	58	48	14	48_14	B	20	16	43483	15	43584	1	40	35	34	28	4	2	0	0	1	0
2896	58	48	14	48_14	B	20	16	43483	16	43591	1	49	33	24	22	2	0	0	0	1	0
2897	58	48	14	48_14	B	20	16	43483	17	43598	1	32	22	31	23	6	2	0	0	1	0
2898	58	48	14	48_14	B	20	16	43483	18	43605	1	30	30	30	27	2	1	0	0	1	0
2899	58	48	14	48_14	B	20	16	43483	19	43612	1	29	47	32	27	5	0	0	0	1	0
2900	58	48	14	48_14	B	20	16	43483	20	43619	1	37	40	33	24	8	1	0	0	1	0
2901	58	48	14	48_14	B	20	16	43483	21	43626	1	38	45	32	25	4	3	0	0	1	0
2902	58	48	14	48_14	B	20	16	43483	22	43633	1	27	32	40	37	3	0	0	0	1	0
2903	58	48	14	48_14	B	20	16	43483	23	43640	1	35	20	55	43	11	1	0	0	1	0
2904	58	48	14	48_14	B	20	16	43483	24	43647	1	48	17	53	45	6	2	0	0	1	0
2905	58	48	14	48_14	B	20	16	43483	25	43654	1	43	3	64	47	10	7	0	0	0	1
2906	58	48	14	48_14	B	20	16	43483	26	43661	1	65	0	71	61	4	6	0	0	0
2907	58	48	14	48_14	B	20	16	43483	27	43668	1	112	0	38	34	4	0	0	0	0
2908	58	48	14	48_14	B	20	16	43483	28	43675	1	90	0	18	15	3	0	0	0	0
4081	66	34	14	34_14	E	20	6	43522	1	43528	0	19	0	1	1	0	0	0	0	1	0
4082	66	34	14	34_14	E	20	6	43522	2	43535	0	20	5	4	4	0	0	0	0	1	0
4083	66	34	14	34_14	E	20	6	43522	3	43542	1	16	4	6	6	0	0	0	4	1	0
4084	66	34	14	34_14	E	20	6	43522	4	43549	1	21	4	3	3	0	0	0	0	1	0
4085	66	34	14	34_14	E	20	6	43522	5	43556	1	24	7	0	0	0	0	0	0	1	0
4086	66	34	14	34_14	E	20	6	43522	6	43563	1	20	10	4	4	0	0	0	0	1	0
4087	66	34	14	34_14	E	20	6	43522	7	43570	1	19	10	6	6	0	0	0	0	1	0
4088	66	34	14	34_14	E	20	6	43522	8	43577	1	19	8	6	6	0	0	0	0	1	0
4089	66	34	14	34_14	E	20	6	43522	9	43584	1	21	5	2	2	0	0	0	0	1	0
4090	66	34	14	34_14	E	20	6	43522	10	43591	1	20	9	2	2	0	0	0	0	1	0
4091	66	34	14	34_14	E	20	6	43522	11	43598	1	20	11	9	6	2	1	0	0	1	0
4092	66	34	14	34_14	E	20	6	43522	12	43605	1	21	5	5	4	1	0	0	0	1	0
4093	66	34	14	34_14	E	20	6	43522	13	43612	1	31	16	10	9	1	0	0	0	1	0
4094	66	34	14	34_14	E	20	6	43522	14	43619	1	27	20	19	19	0	0	0	0	1	0
4095	66	34	14	34_14	E	20	6	43522	15	43626	1	26	18	25	22	2	1	0	0	1	0
4096	66	34	14	34_14	E	20	6	43522	16	43633	1	33	27	22	15	5	2	0	0	1	0
4097	66	34	14	34_14	E	20	6	43522	17	43640	1	28	21	19	14	4	1	0	0	1	0
4098	66	34	14	34_14	E	20	6	43522	18	43647	1	30	42	31	26	5	0	0	0	1	0
4099	66	34	14	34_14	E	20	6	43522	19	43654	1	40	39	38	36	2	0	0	0	1	0
4100	66	34	14	34_14	E	20	6	43522	20	43661	1	43	46	35	32	3	0	0	0	1	0
4101	66	34	14	34_14	E	20	6	43522	21	43668	1	40	24	31	26	4	1	0	0	1	0
4102	66	34	14	34_14	E	20	6	43522	22	43675	1	40	35	27	21	6	0	0	0	1	0
4103	66	34	14	34_14	E	20	6	43522	23	43682	1	25	23	42	37	5	0	0	0	1	0
4104	66	34	14	34_14	E	20	6	43522	24	43689	1	35	19	37	30	6	1	0	0	1	0
4105	66	34	14	34_14	E	20	6	43522	25	43696	1	50	12	27	23	4	0	0	0	1	0
4106	66	34	14	34_14	E	20	6	43522	26	43703	1	33	0	28	21	7	0	0	0	0	1
4107	66	34	14	34_14	E	20	6	43522	27	43710	1	41	0	24	21	3	0	0	0	0
4108	66	34	14	34_14	E	20	6	43522	28	43717	1	50	0	19	11	8	0	0	0	0
4109	66	34	14	34_14	E	20	6	43522	29	43724	1	51	0	8	0	8	0	0	0	0
4241	66	34	13	34_13	E	20	19	43563	1	43570	0	19	0	1	1	0	0	0	0	1	0
4242	66	34	13	34_13	E	20	19	43563	2	43577	1	14	8	3	3	0	0	0	6	1	0
4243	66	34	13	34_13	E	20	19	43563	3	43584	1	21	7	2	2	0	0	0	0	1	0
4244	66	34	13	34_13	E	20	19	43563	4	43591	1	20	6	0	0	0	0	0	0	1	0
4245	66	34	13	34_13	E	20	19	43563	5	43598	1	20	10	1	1	0	0	0	0	1	0
4246	66	34	13	34_13	E	20	19	43563	6	43605	1	17	13	6	6	0	0	0	2	1	0
4247	66	34	13	34_13	E	20	19	43563	7	43612	1	24	16	11	11	0	0	0	0	1	0
4248	66	34	13	34_13	E	20	19	43563	8	43619	1	24	15	12	12	0	0	1	0	1	0
4249	66	34	13	34_13	E	20	19	43563	9	43626	1	22	18	11	11	0	0	0	0	1	0
4250	66	34	13	34_13	E	20	19	43563	10	43633	1	30	24	13	11	2	0	0	0	1	0
4251	66	34	13	34_13	E	20	19	43563	11	43640	1	25	25	16	13	3	0	0	0	1	0
4252	66	34	13	34_13	E	20	19	43563	12	43647	1	23	25	19	15	4	0	0	0	1	0
4253	66	34	13	34_13	E	20	19	43563	13	43654	1	27	19	11	3	0	0	0	0	1	0
4254	66	34	13	34_13	E	20	19	43563	14	43661	1	31	18	22	18	4	0	0	0	1	0
4255	66	34	13	34_13	E	20	19	43563	15	43668	1	28	21	24	18	5	1	0	0	1	0
4256	66	34	13	34_13	E	20	19	43563	16	43675	1	27	23	15	14	1	0	0	0	1	0
4257	66	34	13	34_13	E	20	19	43563	17	43682	1	29	33	24	22	0	2	0	0	1	0
4258	66	34	13	34_13	E	20	19	43563	18	43689	1	25	25	33	28	5	0	0	0	1	0
4259	66	34	13	34_13	E	20	19	43563	19	43696	1	36	11	33	30	3	0	0	0	1	0
4260	66	34	13	34_13	E	20	19	43563	20	43703	1	35	7	33	31	0	2	0	0	1	0
4261	66	34	13	34_13	E	20	19	43563	21	43710	1	40	6	37	28	6	3	0	0	1	0
4262	66	34	13	34_13	E	20	19	43563	22	43717	1	35	2	33	21	12	0	0	0	1	0
4263	66	34	13	34_13	E	20	19	43563	23	43724	1	37	0	40	32	7	1	0	0	1	0
4264	66	34	13	34_13	E	20	19	43563	24	43731	1	44	6	20	18	0	2	0	0	1	0
4265	66	34	13	34_13	E	20	19	43563	25	43738	1	30	5	10	7	3	0	0	0	1	0
4266	66	34	13	34_13	E	20	19	43563	26	43745	1	30	1	4	3	0	1	0	0	1	0
4267	66	34	13	34_13	E	20	19	43563	27	43752	1	22	2	6	4	2	0	0	0	1	0
4268	66	34	13	34_13	E	20	19	43563	28	43759	1	23	0	3	2	1	0	0	0	1	0
4269	66	34	13	34_13	E	20	19	43563	29	43766	1	18	3	3	3	0	0	0	0	1	0
4270	66	34	13	34_13	E	20	19	43563	30	43773	1	20	1	1	1	0	0	0	0	1	0
4271	66	34	13	34_13	E	20	19	43563	31	43780	1	19	6	1	1	0	0	0	0	1	0
4272	66	34	13	34_13	E	20	19	43563	32	43787	1	20	9	1	1	0	0	0	0	1	0
4273	66	34	13	34_13	E	20	19	43563	33	43794	1	20	13	0	0	0	0	0	0	1	0
4274	66	34	13	34_13	E	20	19	43563	34	43801	1	19	10	1	1	0	0	0	0	1	0
4275	66	34	13	34_13	E	20	19	43563	35	43808	1	20	10	3	2	1	0	0	0	1	0
4276	66	34	13	34_13	E	20	19	43563	36	43815	1	22	6	9	8	1	0	0	0	1	0
4277	66	34	13	34_13	E	20	19	43563	37	43822	1	19	16	10	10	0	0	0	0	1	0
4279	66	34	13	34_13	E	20	19	43563	39	43836	1	31	0	21	11	9	1	0	0	0	1
4280	66	34	13	34_13	E	20	19	43563	40	43843	1	27	0	21	11	9	1	0	0	0
4281	66	34	13	34_13	E	20	19	43563	41	43850	1	32	0	16	12	4	0	0	0	0
4282	66	34	13	34_13	E	20	19	43563	42	43857	1	28	0	5	5	0	0	0	0	0
4881	61	34	6	34_6	B	20	9	43593	1	43600	1	19	0	0	0	0	0	0	0	1	0
4882	61	34	6	34_6	B	20	9	43593	2	43607	1	20	5	0	0	0	0	0	0	1	0
4883	61	34	6	34_6	B	20	9	43593	3	43614	1	20	2	0	0	0	0	0	0	1	0
4884	61	34	6	34_6	B	20	9	43593	4	43621	1	20	2	0	0	0	0	0	0	1	0
4885	61	34	6	34_6	B	20	9	43593	5	43628	1	20	3	0	0	0	0	0	0	1	0
4886	61	34	6	34_6	B	20	9	43593	6	43635	1	20	3	2	2	0	0	0	0	1	0
4887	61	34	6	34_6	B	20	9	43593	7	43642	1	19	5	3	3	0	0	0	0	1	0
4888	61	34	6	34_6	B	20	9	43593	8	43649	1	17	5	3	3	0	0	0	3	1	0
4889	61	34	6	34_6	B	20	9	43593	9	43656	1	21	9	6	6	0	0	0	0	1	0
4890	61	34	6	34_6	B	20	9	43593	10	43663	1	20	13	5	5	0	0	0	0	1	0
4891	61	34	6	34_6	B	20	9	43593	11	43670	1	22	11	7	6	0	1	0	0	1	0
4892	61	34	6	34_6	B	20	9	43593	12	43677	1	25	17	10	10	0	0	0	0	1	0
4893	61	34	6	34_6	B	20	9	43593	13	43684	1	21	15	11	8	2	1	0	0	1	0
4894	61	34	6	34_6	B	20	9	43593	14	43691	1	25	8	8	5	3	0	0	0	1	0
4895	61	34	6	34_6	B	20	9	43593	15	43698	1	20	3	16	12	3	1	0	0	1	0
4896	61	34	6	34_6	B	20	9	43593	16	43705	1	23	2	14	10	4	0	0	0	1	0
4897	61	34	6	34_6	B	20	9	43593	17	43712	1	25	5	14	14	0	0	0	0	1	0
4898	61	34	6	34_6	B	20	9	43593	18	43719	1	28	1	11	11	0	0	0	0	1	0
4899	61	34	6	34_6	B	20	9	43593	19	43726	1	26	3	5	3	2	0	0	0	1	0
4900	61	34	6	34_6	B	20	9	43593	20	43733	1	23	3	1	1	0	0	0	0	1	0
4901	61	34	6	34_6	B	20	9	43593	21	43740	1	22	2	3	3	0	0	0	0	1	0
4902	61	34	6	34_6	B	20	9	43593	22	43747	1	19	5	2	2	0	0	0	0	1	0
4903	61	34	6	34_6	B	20	9	43593	23	43754	1	20	6	3	3	0	0	0	0	1	0
4904	61	34	6	34_6	B	20	9	43593	24	43761	1	21	0	3	3	0	0	0	0	1	0
4905	61	34	6	34_6	B	20	9	43593	25	43768	1	23	7	2	2	0	0	0	0	1	0
4906	61	34	6	34_6	B	20	9	43593	26	43775	1	20	7	7	7	0	0	0	0	1	0
4907	61	34	6	34_6	B	20	9	43593	27	43782	1	23	15	8	7	0	1	0	0	1	0
4908	61	34	6	34_6	B	20	9	43593	28	43789	1	23	15	8	7	0	1	0	0	1	0
4909	61	34	6	34_6	B	20	9	43593	29	43796	1	23	10	8	8	0	0	0	0	1	0
4910	61	34	6	34_6	B	20	9	43593	30	43803	1	25	15	9	9	0	0	0	0	1	0
4911	61	34	6	34_6	B	20	9	43593	31	43810	1	24	21	9	7	2	0	0	0	1	0
4912	61	34	6	34_6	B	20	9	43593	32	43817	1	27	14	8	6	2	0	0	0	1	0
4913	61	34	6	34_6	B	20	9	43593	33	43822	1	20	7	11	7	4	0	0	0	1	0
4915	61	34	6	34_6	B	20	9	43593	35	43838	1	27	9	20	13	7	0	0	0	1	0
4916	61	34	6	34_6	B	20	9	43593	36	43845	1	26	5	17	7	7	3	0	0	1	0
4917	61	34	6	34_6	B	20	9	43593	37	43852	1	27	0	10	2	8	0	0	0	0	1
4918	61	34	6	34_6	B	20	9	43593	38	43859	1	29	0	2	0	2	0	0	0	0
4919	61	34	6	34_6	B	20	9	43593	39	43866	1	20	0	6	0	5	1	0	0	0
4920	61	34	6	34_6	B	20	9	43593	40	43873	1	25	0	2	0	2	0	0	0	0
4921	61	34	6	34_6	B	20	9	43593	41	43880	1	25	0	2	0	2	0	0	0	0
5201	61	34	1	34_1	E	20	14	43538	1	43544	0	23	0	3	3	0	0	0	0	1	0
5202	61	34	1	34_1	E	20	14	43538	2	43551	0	20	5	1	1	0	0	0	0	1	0
5203	61	34	1	34_1	E	20	14	43538	3	43558	1	20	7	2	2	0	0	0	0	1	0
5204	61	34	1	34_1	E	20	14	43538	4	43565	1	20	4	1	1	0	0	0	0	1	0
5205	61	34	1	34_1	E	20	14	43538	5	43572	1	17	9	1	1	0	0	0	3	1	0
5206	61	34	1	34_1	E	20	14	43538	6	43579	1	16	15	5	5	0	0	0	4	1	0
5207	61	34	1	34_1	E	20	14	43538	7	43586	1	21	15	10	10	0	0	0	0	1	0
5208	61	34	1	34_1	E	20	14	43538	8	43593	1	24	20	9	9	0	0	0	0	1	0
5209	61	34	1	34_1	E	20	14	43538	9	43600	1	27	19	18	18	0	0	0	0	1	0
5210	61	34	1	34_1	E	20	14	43538	10	43607	1	25	24	27	26	0	1	0	0	1	0
5211	61	34	1	34_1	E	20	14	43538	11	43614	1	36	26	24	18	6	0	0	0	1	0
5212	61	34	1	34_1	E	20	14	43538	12	43621	1	30	33	21	13	7	1	0	0	1	0
5213	61	34	1	34_1	E	20	14	43538	13	43628	1	32	17	31	26	5	0	0	0	1	0
5214	61	34	1	34_1	E	20	14	43538	14	43635	1	29	30	23	17	4	2	0	0	1	0
5215	61	34	1	34_1	E	20	14	43538	15	43642	1	34	31	25	21	4	0	0	0	1	0
5216	61	34	1	34_1	E	20	14	43538	16	43649	1	29	30	36	33	1	2	0	0	1	0
5217	61	34	1	34_1	E	20	14	43538	17	43656	1	31	31	31	25	6	0	0	0	1	0
5218	61	34	1	34_1	E	20	14	43538	18	43663	1	35	13	25	23	1	1	0	0	1	0
5219	61	34	1	34_1	E	20	14	43538	19	43670	1	30	18	30	24	4	2	0	0	1	0
5220	61	34	1	34_1	E	20	14	43538	20	43677	1	38	46	35	32	2	1	0	0	1	0
5221	61	34	1	34_1	E	20	14	43538	21	43684	1	36	34	41	33	8	0	0	0	1	0
5222	61	34	1	34_1	E	20	14	43538	22	43691	1	32	28	28	27	1	0	0	0	1	0
5223	61	34	1	34_1	E	20	14	43538	23	43698	1	34	20	24	20	4	0	0	0	0	1
5224	61	34	1	34_1	E	20	14	43538	24	43705	1	38	2	37	20	14	3	0	0	0
5225	61	34	1	34_1	E	20	14	43538	25	43712	1	35	0	18	12	4	2	0	0	0
5226	61	34	1	34_1	E	20	14	43538	26	43719	1	49	0	9	6	3	0	0	0	0
5227	61	34	1	34_1	E	20	14	43538	27	43726	1	23	0	4	3	1	0	0	0	0
5281	61	41	11	41_11	E	20	3	43488	1	43495	0	20	0	0	0	0	0	0	0	1
5282	61	41	11	41_11	E	20	3	43488	2	43502	0	22	0	0	0	0	0	0	0	1	0
5283	61	41	11	41_11	E	20	3	43488	3	43509	1	19	5	5	5	0	0	0	0	1	0
5284	61	41	11	41_11	E	20	3	43488	4	43516	1	25	10	8	8	0	0	0	0	1	0
5285	61	41	11	41_11	E	20	3	43488	5	43523	1	20	13	4	4	0	0	0	0	1	0
5286	61	41	11	41_11	E	20	3	43488	6	43530	1	26	10	1	1	0	0	0	0	1	0
5287	61	41	11	41_11	E	20	3	43488	7	43537	1	22	17	0	0	0	0	0	0	1	0
5288	61	41	11	41_11	E	20	3	43488	8	43544	1	23	10	4	4	0	0	0	0	1	0
5289	61	41	11	41_11	E	20	3	43488	9	43551	1	20	15	8	8	0	0	0	0	1	0
5290	61	41	11	41_11	E	20	3	43488	10	43558	1	21	17	12	12	0	0	0	0	1	0
5291	61	41	11	41_11	E	20	3	43488	11	43565	1	25	26	17	17	0	0	0	0	1	0
5292	61	41	11	41_11	E	20	3	43488	12	43572	1	26	22	14	14	0	0	0	0	1	0
5293	61	41	11	41_11	E	20	3	43488	13	43579	1	31	24	19	18	0	1	0	0	1	0
5294	61	41	11	41_11	E	20	3	43488	14	43586	1	28	25	26	23	3	0	0	0	1	0
5295	61	41	11	41_11	E	20	3	43488	15	43593	1	35	14	29	25	4	0	0	0	1	0
5296	61	41	11	41_11	E	20	3	43488	16	43600	1	34	28	33	25	8	0	0	0	1	0
5297	61	41	11	41_11	E	20	3	43488	17	43607	1	35	13	22	17	5	0	0	0	1	0
5298	61	41	11	41_11	E	20	3	43488	18	43614	1	32	8	14	14	0	0	0	0	1	0
5299	61	41	11	41_11	E	20	3	43488	19	43621	1	30	11	24	19	4	1	0	0	1	0
5300	61	41	11	41_11	E	20	3	43488	20	43628	1	25	2	14	13	1	0	0	0	1	0
5301	61	41	11	41_11	E	20	3	43488	21	43635	1	25	2	10	9	1	0	0	0	1	0
5302	61	41	11	41_11	E	20	3	43488	22	43642	1	26	3	7	7	0	0	0	0	1	0
5303	61	41	11	41_11	E	20	3	43488	23	43649	1	24	4	3	3	0	0	0	0	1	0
5304	61	41	11	41_11	E	20	3	43488	24	43656	1	23	4	3	3	0	0	0	0	1	0
5305	61	41	11	41_11	E	20	3	43488	25	43663	1	22	8	1	1	0	0	0	0	1	0
5306	61	41	11	41_11	E	20	3	43488	26	43670	1	21	14	2	2	0	0	0	0	1	0
5307	61	41	11	41_11	E	20	3	43488	27	43677	1	21	12	5	3	1	1	0	0	1	0
5308	61	41	11	41_11	E	20	3	43488	28	43684	1	21	17	3	3	0	0	0	0	1	0
5309	61	41	11	41_11	E	20	3	43488	29	43691	1	22	16	9	9	0	0	0	0	1	0
5310	61	41	11	41_11	E	20	3	43488	30	43698	1	22	20	18	17	0	1	0	0	1	0
5311	61	41	11	41_11	E	20	3	43488	31	43705	1	30	23	14	11	3	0	0	0	1	0
5312	61	41	11	41_11	E	20	3	43488	32	43712	1	25	24	21	15	6	0	0	0	1	0
5313	61	41	11	41_11	E	20	3	43488	33	43719	1	27	11	18	6	10	2	0	0	1	0
5314	61	41	11	41_11	E	20	3	43488	34	43726	1	25	3	11	0	10	1	0	0	0	1
5315	61	41	11	41_11	E	20	3	43488	35	43733	1	26	0	15	0	14	1	0	0	0
5316	61	41	11	41_11	E	20	3	43488	36	43740	1	25	0	12	0	12	0	0	0	0
5317	61	41	11	41_11	E	20	3	43488	37	43747	1	24	0	8	2	6	0	0	0	0
5318	61	41	11	41_11	E	20	3	43488	38	43754	1	24	0	5	2	3	0	0	0	0
5319	61	41	11	41_11	E	20	3	43488	39	43761	1	24	0	0	0	0	0	0	0	0
5361	61	41	12	41_12	B	20	17	43488	1	43495	0	20	0	0	0	0	0	0	0	1	0
5362	61	41	12	41_12	B	20	17	43488	2	43502	1	18	0	0	0	0	0	0	2	1	0
5363	61	41	12	41_12	B	20	17	43488	3	43509	1	20	11	10	10	0	0	0	0	1	0
5364	61	41	12	41_12	B	20	17	43488	4	43516	1	24	9	2	2	0	0	0	0	1	0
5365	61	41	12	41_12	B	20	17	43488	5	43523	1	22	5	1	1	0	0	0	0	1	0
5366	61	41	12	41_12	B	20	17	43488	6	43530	1	16	11	3	3	0	0	0	3	1	0
5367	61	41	12	41_12	B	20	17	43488	7	43537	1	22	8	5	5	0	0	0	0	1	0
5368	61	41	12	41_12	B	20	17	43488	8	43544	1	19	15	8	8	0	0	0	0	1	0
5369	61	41	12	41_12	B	20	17	43488	9	43551	1	20	17	11	11	0	0	0	0	1	0
5370	61	41	12	41_12	B	20	17	43488	10	43558	1	25	18	11	11	0	0	0	0	1	0
5371	61	41	12	41_12	B	20	17	43488	11	43565	1	24	18	8	6	2	0	0	0	1	0
5372	61	41	12	41_12	B	20	17	43488	12	43572	1	23	26	18	15	3	0	0	0	1	0
5373	61	41	12	41_12	B	20	17	43488	13	43579	1	24	34	25	18	7	0	0	0	1	0
5374	61	41	12	41_12	B	20	17	43488	14	43586	1	30	30	22	19	3	0	0	0	1	0
5375	61	41	12	41_12	B	20	17	43488	15	43593	1	37	12	34	25	7	2	0	0	1	0
5376	61	41	12	41_12	B	20	17	43488	16	43600	1	30	20	26	24	1	1	0	0	1	0
5377	61	41	12	41_12	B	20	17	43488	17	43607	1	31	28	18	14	4	0	0	0	1	0
5378	61	41	12	41_12	B	20	17	43488	18	43614	1	30	24	14	11	2	1	0	0	1	0
5379	61	41	12	41_12	B	20	17	43488	19	43621	1	21	31	9	9	0	0	0	0	1	0
5380	61	41	12	41_12	B	20	17	43488	20	43628	1	24	37	9	8	1	0	0	0	1	0
5381	61	41	12	41_12	B	20	17	43488	21	43635	1	24	31	22	15	7	0	0	0	1	0
5382	61	41	12	41_12	B	20	17	43488	22	43642	1	24	28	17	16	1	0	0	0	1	0
5383	61	41	12	41_12	B	20	17	43488	23	43649	1	31	22	25	24	1	0	0	0	1	0
5384	61	41	12	41_12	B	20	17	43488	24	43656	1	29	23	22	22	0	0	0	0	1	0
5385	61	41	12	41_12	B	20	17	43488	25	43663	1	39	29	14	14	0	0	0	0	1	0
5386	61	41	12	41_12	B	20	17	43488	26	43670	1	30	24	17	13	2	2	0	0	1	0
5387	61	41	12	41_12	B	20	17	43488	27	43677	1	31	32	25	13	11	1	0	0	1	0
5388	61	41	12	41_12	B	20	17	43488	28	43684	1	22	31	31	24	6	1	0	0	1	0
5389	61	41	12	41_12	B	20	17	43488	29	43691	1	24	33	23	18	5	0	0	0	1	0
5390	61	41	12	41_12	B	20	17	43488	30	43698	1	33	18	29	12	16	1	0	0	1	0
5391	61	41	12	41_12	B	20	17	43488	31	43705	1	33	7	20	0	19	1	0	0	1	0
5392	61	41	12	41_12	B	20	17	43488	32	43712	1	22	0	18	0	17	1	0	0	0	1
5393	61	41	12	41_12	B	20	17	43488	33	43719	1	20	0	13	1	10	2	0	0	0
5394	61	41	12	41_12	B	20	17	43488	34	43726	1	22	0	9	9	0	0	0	0	0
5395	61	41	12	41_12	B	20	17	43488	35	43733	1	22	0	3	0	3	0	0	0	0
5396	61	41	12	41_12	B	20	17	43488	36	43740	1	17	0	0	0	0	0	0	0	0
5601	61	41	14	41_14	E	20	2	43530	1	43537	0	18	0	3	3	0	0	0	2	1	0
5602	61	41	14	41_14	E	20	2	43530	2	43544	1	20	4	9	9	0	0	0	0	1	0
5603	61	41	14	41_14	E	20	2	43530	3	43551	1	21	8	7	7	0	0	0	0	1	0
5604	61	41	14	41_14	E	20	2	43530	4	43558	1	28	8	0	0	0	0	0	0	1	0
5605	61	41	14	41_14	E	20	2	43530	5	43565	1	20	12	1	1	0	0	0	0	1	0
5606	61	41	14	41_14	E	20	2	43530	6	43572	1	20	13	9	9	0	0	0	0	1	0
5607	61	41	14	41_14	E	20	2	43530	7	43579	1	21	15	10	10	0	0	0	0	1	0
5608	61	41	14	41_14	E	20	2	43530	8	43586	1	25	18	15	14	1	0	0	0	1	0
5609	61	41	14	41_14	E	20	2	43530	9	43593	1	27	30	18	18	0	0	0	0	1	0
5610	61	41	14	41_14	E	20	2	43530	10	43600	1	27	29	25	22	2	1	0	0	1	0
5611	61	41	14	41_14	E	20	2	43530	11	43607	1	34	20	27	23	4	0	0	0	1	0
5612	61	41	14	41_14	E	20	2	43530	12	43614	1	31	40	37	32	5	0	0	0	1	0
5613	61	41	14	41_14	E	20	2	43530	13	43621	1	37	39	57	49	8	0	0	0	1	0
5614	61	41	14	41_14	E	20	2	43530	14	43628	1	57	43	61	48	10	3	0	0	1	0
5615	61	41	14	41_14	E	20	2	43530	15	43635	1	46	35	58	48	9	1	0	0	1	0
5616	61	41	14	41_14	E	20	2	43530	16	43642	1	45	38	51	39	12	0	0	0	1	0
5617	61	41	14	41_14	E	20	2	43530	17	43649	1	43	32	44	44	0	0	0	0	1	0
5618	61	41	14	41_14	E	20	2	43530	18	43656	1	50	45	71	65	6	0	0	0	1	0
5619	61	41	14	41_14	E	20	2	43530	19	43663	1	56	26	60	47	10	3	0	0	1	0
5620	61	41	14	41_14	E	20	2	43530	20	43670	1	67	58	52	44	7	1	0	0	1	0
5621	61	41	14	41_14	E	20	2	43530	21	43677	1	50	66	72	64	6	2	0	0	1	0
5622	61	41	14	41_14	E	20	2	43530	22	43684	1	63	37	89	83	5	1	0	0	1	0
5623	61	41	14	41_14	E	20	2	43530	23	43691	1	69	71	99	90	7	2	0	0	1	0
5624	61	41	14	41_14	E	20	2	43530	24	43698	1	78	36	87	74	12	1	0	0	1	0
5625	61	41	14	41_14	E	20	2	43530	25	43705	1	80	10	114	90	20	4	0	0	1	0
5626	61	41	14	41_14	E	20	2	43530	26	43712	1	63	5	104	72	31	1	0	0	0	1
5627	61	41	14	41_14	E	20	2	43530	27	43719	1	77	0	52	17	33	2	0	0	0
5628	61	41	14	41_14	E	20	2	43530	28	43726	1	69	0	56	18	34	4	0	0	0
5629	61	41	14	41_14	E	20	2	43530	29	43733	1	72	0	48	31	17	0	0	0	0
5630	61	41	14	41_14	E	20	2	43530	30	43740	1	71	0	22	20	2	0	0	0	0
5631	61	41	14	41_14	E	20	2	43530	31	43747	1	76	0	2	2	0	0	0	0	0
5841	61	41	4	41_4	E	20	13	43489	1	43495	0	20	0	0	0	0	0	0	0	1	0
5842	61	41	4	41_4	E	20	13	43489	2	43502	0	19	0	0	0	0	0	0	1	1	0
5843	61	41	4	41_4	E	20	13	43489	3	43509	0	20	0	3	3	0	0	0	0	1	0
5844	61	41	4	41_4	E	20	13	43489	4	43516	0	20	4	3	3	0	0	0	0	1	0
5845	61	41	4	41_4	E	20	13	43489	5	43523	1	21	8	4	4	0	0	0	0	1	0
5846	61	41	4	41_4	E	20	13	43489	6	43530	1	19	5	2	2	0	0	0	0	1	0
5847	61	41	4	41_4	E	20	13	43489	7	43537	1	20	12	0	0	0	0	0	0	1	0
5848	61	41	4	41_4	E	20	13	43489	8	43544	1	20	16	5	5	0	0	0	0	1	0
5849	61	41	4	41_4	E	20	13	43489	9	43551	1	21	22	8	8	0	0	0	0	1	0
5850	61	41	4	41_4	E	20	13	43489	10	43558	1	23	16	10	10	0	0	0	0	1	0
5851	61	41	4	41_4	E	20	13	43489	11	43565	1	24	15	13	13	0	0	0	0	1	0
5852	61	41	4	41_4	E	20	13	43489	12	43572	1	25	24	12	8	4	0	0	0	1	0
5853	61	41	4	41_4	E	20	13	43489	13	43579	1	26	20	11	6	5	0	0	0	1	0
5854	61	41	4	41_4	E	20	13	43489	14	43586	1	18	12	16	14	2	0	0	0	1	0
5855	61	41	4	41_4	E	20	13	43489	15	43593	1	20	5	13	11	2	0	0	0	0	1
6401	60	48	10	48_10	B	20	14	43517	1	43523	0	23	0	0	0	0	0	0	0	1	0
6402	60	48	10	48_10	B	20	14	43517	2	43530	1	19	5	0	0	0	0	0	0	1	0
6403	60	48	10	48_10	B	20	14	43517	3	43537	1	20	7	2	2	0	0	0	0	1	0
6404	60	48	10	48_10	B	20	14	43517	4	43544	1	20	6	1	1	0	0	0	0	1	0
6405	60	48	10	48_10	B	20	14	43517	5	43551	1	21	8	0	0	0	0	0	0	1	0
6406	60	48	10	48_10	B	20	14	43517	6	43558	1	21	10	2	2	0	0	0	0	1	0
6407	60	48	10	48_10	B	20	14	43517	7	43565	1	20	8	5	5	0	0	0	0	1	0
6408	60	48	10	48_10	B	20	14	43517	8	43572	1	21	4	6	6	0	0	0	0	1	0
6409	60	48	10	48_10	B	20	14	43517	9	43579	1	21	8	6	6	0	0	0	0	1	0
6410	60	48	10	48_10	B	20	14	43517	10	43586	1	20	7	9	9	0	0	0	0	1	0
6411	60	48	10	48_10	B	20	14	43517	11	43593	1	22	5	5	5	0	0	0	0	1	0
6412	60	48	10	48_10	B	20	14	43517	12	43600	1	24	10	3	2	1	0	0	0	1	0
6413	60	48	10	48_10	B	20	14	43517	13	43607	1	20	12	4	4	0	0	0	0	1	0
6414	60	48	10	48_10	B	20	14	43517	14	43614	1	22	16	5	4	1	0	0	0	1	0
6415	60	48	10	48_10	B	20	14	43517	15	43621	1	21	14	7	7	0	0	0	0	1	0
6416	60	48	10	48_10	B	20	14	43517	16	43628	1	20	15	14	14	0	0	0	0	1	0
6417	60	48	10	48_10	B	20	14	43517	17	43635	1	21	16	15	15	0	0	0	0	1	0
6418	60	48	10	48_10	B	20	14	43517	18	43642	1	31	21	14	14	0	0	0	0	1	0
6419	60	48	10	48_10	B	20	14	43517	19	43649	1	22	14	23	21	2	0	0	0	1	0
6420	60	48	10	48_10	B	20	14	43517	20	43656	1	29	13	24	22	2	0	0	0	1	0
6421	60	48	10	48_10	B	20	14	43517	21	43663	1	31	19	22	20	2	0	0	0	1	0
6422	60	48	10	48_10	B	20	14	43517	22	43670	1	29	22	15	15	0	0	0	0	1	0
6423	60	48	10	48_10	B	20	14	43517	23	43677	1	33	30	18	17	1	0	0	0	1	0
6424	60	48	10	48_10	B	20	14	43517	24	43684	1	26	28	21	19	2	0	0	0	1	0
6425	60	48	10	48_10	B	20	14	43517	25	43691	1	30	29	16	14	2	0	0	0	1	0
6426	60	48	10	48_10	B	20	14	43517	26	43698	1	28	21	15	12	3	0	0	0	1	0
6427	60	48	10	48_10	B	20	14	43517	27	43705	1	22	13	30	26	4	0	0	0	0	1
6428	60	48	10	48_10	B	20	14	43517	28	43712	1	26	0	27	22	4	1	0	0	0
6429	60	48	10	48_10	B	20	14	43517	29	43719	1	45	0	26	18	7	1	0	0	0
6430	60	48	10	48_10	B	20	14	43517	30	43726	1	34	0	14	11	3	0	0	0	0
6431	60	48	10	48_10	B	20	14	43517	31	43733	1	39	0	7	4	3	0	0	0	0
6561	60	48	12	48_12	E	20	1	43565	1	43572	0	17	6	4	4	0	0	0	3	1	0
6562	60	48	12	48_12	E	20	1	43565	2	43579	1	14	7	2	2	0	0	0	5	1	0
6563	60	48	12	48_12	E	20	1	43565	3	43586	1	19	8	0	0	0	0	0	0	1	0
6564	60	48	12	48_12	E	20	1	43565	4	43593	1	16	6	2	2	0	0	0	5	1	0
6565	60	48	12	48_12	E	20	1	43565	5	43600	1	19	12	8	8	0	0	0	0	1	0
6566	60	48	12	48_12	E	20	1	43565	6	43607	1	23	19	8	8	0	0	0	0	1	0
6567	60	48	12	48_12	E	20	1	43565	7	43614	1	23	14	5	5	0	0	0	0	1	0
6568	60	48	12	48_12	E	20	1	43565	8	43621	1	24	7	9	9	0	0	0	0	1	0
6569	60	48	12	48_12	E	20	1	43565	9	43628	1	20	6	13	13	0	0	0	0	1	0
6570	60	48	12	48_12	E	20	1	43565	10	43635	1	29	7	15	12	1	2	0	0	1	0
6571	60	48	12	48_12	E	20	1	43565	11	43642	1	27	10	14	11	3	0	0	0	1	0
6572	60	48	12	48_12	E	20	1	43565	12	43649	1	23	10	11	9	2	0	0	0	1	0
6573	60	48	12	48_12	E	20	1	43565	13	43656	1	26	13	13	8	5	0	0	0	1	0
6574	60	48	12	48_12	E	20	1	43565	14	43663	1	20	21	6	5	1	0	0	0	1	0
6575	60	48	12	48_12	E	20	1	43565	15	43670	1	21	21	10	5	5	0	0	0	1	0
6576	60	48	12	48_12	E	20	1	43565	16	43677	1	22	16	13	12	1	0	0	0	1	0
6577	60	48	12	48_12	E	20	1	43565	17	43684	1	26	22	26	26	0	0	0	0	1	0
6578	60	48	12	48_12	E	20	1	43565	18	43691	1	22	25	28	28	0	0	0	0	1	0
6579	60	48	12	48_12	E	20	1	43565	19	43698	1	31	19	28	27	1	0	0	0	1	0
6580	60	48	12	48_12	E	20	1	43565	20	43705	1	20	16	26	24	2	0	0	0	1	0
6581	60	48	12	48_12	E	20	1	43565	21	43712	1	39	9	31	20	11	0	0	0	1	0
6582	60	48	12	48_12	E	20	1	43565	22	43719	1	42	7	30	22	8	0	0	0	1	0
6583	60	48	12	48_12	E	20	1	43565	23	43726	1	25	10	29	23	5	1	0	0	1	0
6584	60	48	12	48_12	E	20	1	43565	24	43733	1	20	11	22	9	11	2	0	0	1	0
6585	60	48	12	48_12	E	20	1	43565	25	43740	1	29	12	10	1	9	0	0	0	1	0
6586	60	48	12	48_12	E	20	1	43565	26	43747	1	18	18	14	1	13	0	0	0	1	0
6587	60	48	12	48_12	E	20	1	43565	27	43754	1	18	13	11	5	3	3	0	0	1	0
6588	60	48	12	48_12	E	20	1	43565	28	43761	1	16	17	7	2	5	0	0	0	1	0
6589	60	48	12	48_12	E	20	1	43565	29	43768	1	20	18	9	6	2	1	1	0	1	0
6590	60	48	12	48_12	E	20	1	43565	30	43775	1	26	16	18	2	16	0	0	0	1	0
6591	60	48	12	48_12	E	20	1	43565	31	43782	1	18	18	18	10	8	0	0	0	1	0
6592	60	48	12	48_12	E	20	1	43565	32	43789	1	19	15	20	20	0	0	0	0	1	0
6593	60	48	12	48_12	E	20	1	43565	33	43796	1	29	20	19	19	0	0	1	0	1	0
6594	60	48	12	48_12	E	20	1	43565	34	43803	1	27	3	28	24	4	0	0	0	0	1
6595	60	48	12	48_12	E	20	1	43565	35	43810	1	36	0	31	24	6	1	0	0	0
6596	60	48	12	48_12	E	20	1	43565	36	43817	1	46	0	23	18	5	0	0	0	0
6597	60	48	12	48_12	E	20	1	43565	37	43822	1	53	0	17	13	4	0	0	0	0
6599	60	48	12	48_12	E	20	1	43565	39	43838	1	29	0	4	0	3	1	0	0	0
7441	60	48	8	48_8	E	20	8	43558	1	43565	1	20	0	3	3	0	0	0	0	1	0
7442	60	48	8	48_8	E	20	8	43558	2	43572	1	18	9	5	5	0	0	0	0	1	0
7443	60	48	8	48_8	E	20	8	43558	3	43579	1	19	6	2	2	0	0	0	0	1	0
7444	60	48	8	48_8	E	20	8	43558	4	43586	1	20	5	0	0	0	0	0	0	1	0
7445	60	48	8	48_8	E	20	8	43558	5	43593	1	20	4	2	2	0	0	0	0	1	0
7446	60	48	8	48_8	E	20	8	43558	6	43600	1	20	11	4	4	0	0	0	0	1	0
7447	60	48	8	48_8	E	20	8	43558	7	43607	1	19	15	5	5	0	0	0	0	1	0
7448	60	48	8	48_8	E	20	8	43558	8	43614	1	24	14	3	3	0	0	0	0	1	0
7449	60	48	8	48_8	E	20	8	43558	9	43621	1	19	14	5	4	0	1	0	0	1	0
7450	60	48	8	48_8	E	20	8	43558	10	43628	1	18	18	10	7	2	1	0	2	1	0
7451	60	48	8	48_8	E	20	8	43558	11	43635	1	23	15	6	4	2	0	0	0	1	0
7452	60	48	8	48_8	E	20	8	43558	12	43642	1	24	17	9	7	2	0	0	0	1	0
7453	60	48	8	48_8	E	20	8	43558	13	43649	1	20	21	15	14	1	0	0	0	1	0
7454	60	48	8	48_8	E	20	8	43558	14	43656	1	25	9	16	14	2	0	0	0	1	0
7455	60	48	8	48_8	E	20	8	43558	15	43663	1	26	4	12	12	0	0	0	0	1	0
7456	60	48	8	48_8	E	20	8	43558	16	43670	1	28	5	19	19	0	0	0	0	1	0
7457	60	48	8	48_8	E	20	8	43558	17	43677	1	28	8	19	15	4	0	0	0	1	0
7458	60	48	8	48_8	E	20	8	43558	18	43684	1	29	7	29	23	5	1	0	0	1	0
7459	60	48	8	48_8	E	20	8	43558	19	43691	1	33	4	11	10	1	0	0	0	1	0
7460	60	48	8	48_8	E	20	8	43558	20	43698	1	27	9	7	5	2	0	0	0	1	0
7461	60	48	8	48_8	E	20	8	43558	21	43705	1	21	12	10	9	1	0	0	0	1	0
7462	60	48	8	48_8	E	20	8	43558	22	43712	1	25	8	11	9	2	0	0	0	1	0
7463	60	48	8	48_8	E	20	8	43558	23	43719	1	24	10	5	5	0	0	0	0	1	0
7464	60	48	8	48_8	E	20	8	43558	24	43726	1	19	13	4	2	2	0	0	0	1	0
7465	60	48	8	48_8	E	20	8	43558	25	43733	1	20	10	8	3	4	1	0	0	1	0
7466	60	48	8	48_8	E	20	8	43558	26	43740	1	23	8	7	2	4	1	0	0	1	0
7467	60	48	8	48_8	E	20	8	43558	27	43747	1	20	3	4	1	3	0	0	0	1	0
7468	60	48	8	48_8	E	20	8	43558	28	43754	1	22	1	8	0	8	0	0	0	1	0
7469	60	48	8	48_8	E	20	8	43558	29	43761	1	19	5	8	0	8	0	0	0	1	0
7470	60	48	8	48_8	E	20	8	43558	30	43768	1	18	4	2	2	0	0	0	2	1	0
7471	60	48	8	48_8	E	20	8	43558	31	43775	1	17	4	2	0	2	0	0	3	1	0
7472	60	48	8	48_8	E	20	8	43558	32	43782	1	19	3	0	0	0	0	0	0	1	0
7473	60	48	8	48_8	E	20	8	43558	33	43789	1	17	3	2	2	0	0	0	3	1	0
7474	60	48	8	48_8	E	20	8	43558	34	43796	1	22	3	4	1	3	0	0	0	1	0
7475	60	48	8	48_8	E	20	8	43558	35	43803	1	17	5	5	3	1	1	0	3	1	0
7476	60	48	8	48_8	E	20	8	43558	36	43810	1	18	4	4	3	0	1	0	0	0	1
7477	60	48	8	48_8	E	20	8	43558	37	43817	1	18	0	0	0	0	0	0	0	0
7478	60	48	8	48_8	E	20	8	43558	38	43822	1	20	0	1	0	1	0	0	0	0
7480	60	48	8	48_8	E	20	8	43558	40	43838	1	17	0	5	0	5	0	0	0	0
7481	60	48	8	48_8	E	20	8	43558	41	43845	1	17	0	1	0	1	0	0	0	0
7601	60	48	6	48_6	B	20	36	43538	1	43544	0	17	3	3	3	0	0	0	6	1	0
7602	60	48	6	48_6	B	20	36	43538	2	43551	1	18	2	3	3	0	0	0	0	1	0
7603	60	48	6	48_6	B	20	36	43538	3	43558	1	20	6	0	0	0	0	0	0	1	0
7604	60	48	6	48_6	B	20	36	43538	4	43565	1	19	8	0	0	0	0	0	0	1	0
7605	60	48	6	48_6	B	20	36	43538	5	43572	1	17	6	4	4	0	0	0	3	1	0
7606	60	48	6	48_6	B	20	36	43538	6	43579	1	19	10	8	8	0	0	0	0	1	0
7607	60	48	6	48_6	B	20	36	43538	7	43586	1	21	13	7	7	0	0	0	0	1	0
7608	60	48	6	48_6	B	20	36	43538	8	43593	1	26	14	9	9	0	0	0	0	1	0
7609	60	48	6	48_6	B	20	36	43538	9	43600	1	19	13	10	10	0	0	0	0	1	0
7610	60	48	6	48_6	B	20	36	43538	10	43607	1	26	14	12	10	2	0	0	0	1	0
7611	60	48	6	48_6	B	20	36	43538	11	43614	1	25	10	9	8	1	0	0	0	1	0
7612	60	48	6	48_6	B	20	36	43538	12	43621	1	24	11	8	8	0	0	0	0	1	0
7613	60	48	6	48_6	B	20	36	43538	13	43628	1	19	9	9	8	1	0	0	0	1	0
7614	60	48	6	48_6	B	20	36	43538	14	43635	1	22	6	4	4	0	0	0	0	1	0
7615	60	48	6	48_6	B	20	36	43538	15	43642	1	21	9	7	5	1	1	0	0	1	0
7616	60	48	6	48_6	B	20	36	43538	16	43649	1	23	10	8	8	0	0	0	0	1	0
7617	60	48	6	48_6	B	20	36	43538	17	43656	1	23	10	9	9	0	0	0	0	1	0
7618	60	48	6	48_6	B	20	36	43538	18	43663	1	24	16	12	12	0	0	0	0	1	0
7619	60	48	6	48_6	B	20	36	43538	19	43670	1	24	18	19	18	0	1	0	0	1	0
7620	60	48	6	48_6	B	20	36	43538	20	43677	1	29	19	17	17	0	0	0	0	1	0
7621	60	48	6	48_6	B	20	36	43538	21	43684	1	30	13	17	15	2	0	0	0	1	0
7622	60	48	6	48_6	B	20	36	43538	22	43691	1	32	22	23	18	4	1	0	0	1	0
7623	60	48	6	48_6	B	20	36	43538	23	43698	1	29	18	10	10	0	0	0	0	1	0
7624	60	48	6	48_6	B	20	36	43538	24	43705	1	29	26	13	6	6	1	0	0	1	0
7625	67	48	6	48_6	B	20	36	43538	25	43712	1	24	19	10	8	2	0	0	0	1	0
7626	67	48	6	48_6	B	20	36	43538	26	43719	1	21	24	13	9	4	0	0	0	1	0
7627	60	48	6	48_6	B	20	36	43538	27	43726	1	23	13	15	6	8	1	0	0	1	0
7628	60	48	6	48_6	B	20	36	43538	28	43733	1	20	16	12	6	5	1	0	0	1	0
7629	60	48	6	48_6	B	20	36	43538	29	43740	1	25	13	11	0	11	0	0	0	1	0
7630	60	48	6	48_6	B	20	36	43538	30	43747	1	19	7	16	5	9	2	0	0	1	0
7631	60	48	6	48_6	B	20	36	43538	31	43754	1	17	8	8	0	8	0	0	3	1	0
7632	60	48	6	48_6	B	20	36	43538	32	43761	1	18	16	6	0	5	1	0	0	1	0
7633	60	48	6	48_6	B	20	36	43538	33	43768	1	15	13	6	0	5	1	0	0	1	0
7635	60	48	6	48_6	B	20	36	43538	35	43782	1	19	12	5	0	3	2	0	0	1	0
7636	60	48	6	48_6	B	20	36	43538	36	43789	1	15	11	4	1	2	1	0	5	1	0
7637	60	48	6	48_6	B	20	36	43538	37	43796	1	16	6	3	2	1	0	0	0	1	0
7638	60	48	6	48_6	B	20	36	43538	38	43803	1	21	7	3	2	0	1	0	0	1	0
7639	60	48	6	48_6	B	20	36	43538	39	43810	1	21	14	3	3	0	0	0	0	1	0
7640	60	48	6	48_6	B	20	36	43538	40	43817	1	19	11	6	5	1	0	0	0	1	0
7641	60	48	6	48_6	B	20	36	43538	41	43822	1	21	10	7	5	1	1	0	0	1	0
7643	60	48	6	48_6	B	20	36	43538	43	43838	1	18	0	6	6	0	0	0	0	0	1
7644	60	48	6	48_6	B	20	36	43538	44	43845	1	17	0	5	0	2	3	0	0	0
7645	60	48	6	48_6	B	20	36	43538	45	43852	1	21	0	3	3	0	0	0	0	0
7646	60	48	6	48_6	B	20	36	43538	46	43859	1	21	0	2	1	1	0	0	0	0
7647	60	48	6	48_6	B	20	36	43538	47	43866	1	21	0	1	0	1	0	0	0	0
7761	67	48	7	48_7	E	20	29	43594	1	43600	1	22	2	0	0	0	0	0	0	1	0
7762	67	48	7	48_7	E	20	29	43594	2	43607	1	19	1	0	0	0	0	0	0	1	0
7763	67	48	7	48_7	E	20	29	43594	3	43614	1	12	8	0	0	0	0	0	8	1	0
7764	67	48	7	48_7	E	20	29	43594	4	43621	1	26	8	1	0	1	0	0	0	1	0
7765	67	48	7	48_7	E	20	29	43594	5	43628	1	19	7	1	1	0	0	0	0	1	0
7766	67	48	7	48_7	E	20	29	43594	6	43635	1	18	7	4	4	0	0	0	2	1	0
7767	67	48	7	48_7	E	20	29	43594	7	43642	1	21	10	9	9	0	0	0	0	1	0
7768	67	48	7	48_7	E	20	29	43594	8	43649	1	23	16	10	10	0	0	0	0	1	0
7769	67	48	7	48_7	E	20	29	43594	9	43656	1	27	15	9	7	0	2	0	0	1	0
7770	67	48	7	48_7	E	20	29	43594	10	43663	1	20	12	5	5	0	0	0	0	1	0
7771	67	48	7	48_7	E	20	29	43594	11	43670	1	26	20	10	10	0	0	0	0	1	0
7772	67	48	7	48_7	E	20	29	43594	12	43677	1	21	20	12	11	1	0	0	0	1	0
7773	67	48	7	48_7	E	20	29	43594	13	43684	1	29	20	13	13	0	0	0	0	1	0
7774	67	48	7	48_7	E	20	29	43594	14	43691	1	22	18	13	11	2	0	0	0	1	0
7775	67	48	7	48_7	E	20	29	43594	15	43698	1	23	20	6	6	0	0	0	0	1	0
7776	67	48	7	48_7	E	20	29	43594	16	43705	1	27	28	6	6	0	0	0	0	1	0
7777	67	48	7	48_7	E	20	29	43594	17	43712	1	25	34	10	10	0	0	0	0	1	0
7778	67	48	7	48_7	E	20	29	43594	18	43719	1	27	11	14	14	0	0	0	0	1	0
7779	67	48	7	48_7	E	20	29	43594	19	43726	1	22	8	14	13	1	0	0	0	1	0
7780	67	48	7	48_7	E	20	29	43594	20	43733	1	27	8	13	9	4	0	0	0	1	0
7781	67	48	7	48_7	E	20	29	43594	21	43740	1	23	6	16	11	5	0	0	0	1	0
7782	67	48	7	48_7	E	20	29	43594	22	43747	1	21	3	9	8	1	0	0	0	1	0
7783	67	48	7	48_7	E	20	29	43594	23	43754	1	25	7	5	2	3	0	0	0	1	0
7784	67	48	7	48_7	E	20	29	43594	24	43761	1	23	0	0	0	0	0	0	0	0	1
7785	67	48	7	48_7	E	20	29	43594	25	43768	1	21	0	1	0	1	0	0	0	0
7786	67	48	7	48_7	E	20	29	43594	26	43775	1	19	0	1	0	1	0	0	0	0
7921	67	48	10	48_10	E	20	26	43558	1	43565	0	19	0	1	1	0	0	0	1	1	0
7922	67	48	10	48_10	E	20	26	43558	2	43572	1	17	1	4	4	0	0	0	3	1	0
7923	67	48	10	48_10	E	20	26	43558	3	43579	1	20	4	3	3	0	0	0	0	1	0
7924	67	48	10	48_10	E	20	26	43558	4	43586	1	22	6	0	0	0	0	0	0	1	0
7925	67	48	10	48_10	E	20	26	43558	5	43593	1	18	7	0	0	0	0	0	2	1	0
7926	67	48	10	48_10	E	20	26	43558	6	43600	1	21	11	3	3	0	0	0	0	1	0
7927	67	48	10	48_10	E	20	26	43558	7	43607	1	20	11	8	8	0	0	0	0	1	0
7928	67	48	10	48_10	E	20	26	43558	8	43614	1	23	13	6	6	0	0	0	0	1	0
7929	67	48	10	48_10	E	20	26	43558	9	43621	1	24	15	8	8	0	0	0	0	1	0
7930	67	48	10	48_10	E	20	26	43558	10	43628	1	22	5	3	2	0	1	0	0	1	0
7931	67	48	10	48_10	E	20	26	43558	11	43635	1	25	7	13	12	0	1	0	0	1	0
7932	67	48	10	48_10	E	20	26	43558	12	43642	1	21	6	13	12	1	0	0	0	1	0
7933	67	48	10	48_10	E	20	26	43558	13	43649	1	28	7	20	18	2	0	0	0	0	1
7934	67	48	10	48_10	E	20	26	43558	14	43656	1	31	1	17	14	2	1	0	0	0
7935	67	48	10	48_10	E	20	26	43558	15	43663	1	37	0	9	8	1	0	0	0	0
7936	67	48	10	48_10	E	20	26	43558	16	43670	1	40	0	11	11	0	0	0	0	0
7937	67	48	10	48_10	E	20	26	43558	17	43677	1	40	0	13	13	0	0	0	0	0
7938	67	48	10	48_10	E	20	26	43558	18	43684	1	41	0	7	6	1	0	0	0	0
8001	67	18	4	18_4	B	20	7	43489	1	43495	0	20	0	0	0	0	0	0	0	1	0
8002	67	18	4	18_4	B	20	7	43489	2	43502	0	18	0	0	0	0	0	0	2	1	0
8003	67	18	4	18_4	B	20	7	43489	3	43509	1	15	4	4	4	0	0	0	2	1	0
8004	67	18	4	18_4	B	20	7	43489	4	43516	1	20	6	0	0	0	0	0	0	1	0
8005	67	18	4	18_4	B	20	7	43489	5	43523	1	18	8	1	1	0	0	0	2	1	0
8006	67	18	4	18_4	B	20	7	43489	6	43530	1	17	12	4	4	0	0	0	3	1	0
8007	67	18	4	18_4	B	20	7	43489	7	43537	1	17	23	11	11	0	0	0	0	1	0
8008	67	18	4	18_4	B	20	7	43489	8	43544	1	19	20	12	12	0	0	0	0	1	0
8009	67	18	4	18_4	B	20	7	43489	9	43551	1	27	27	15	15	0	0	0	0	1	0
8010	67	18	4	18_4	B	20	7	43489	10	43558	1	23	23	15	12	2	1	0	0	1	0
8011	67	18	4	18_4	B	20	7	43489	11	43565	1	32	25	16	15	0	1	0	0	1	0
8012	67	18	4	18_4	B	20	7	43489	12	43572	1	22	28	29	22	5	2	0	0	1	0
8013	67	18	4	18_4	B	20	7	43489	13	43579	1	25	26	23	20	3	0	0	0	1	0
8014	67	18	4	18_4	B	20	7	43489	14	43586	1	27	35	18	15	3	0	0	0	1	0
8015	67	18	4	18_4	B	20	7	43489	15	43593	1	29	30	27	21	6	0	0	0	1	0
8016	67	18	4	18_4	B	20	7	43489	16	43600	1	28	31	27	24	3	0	0	0	1	0
8017	67	18	4	18_4	B	20	7	43489	17	43607	1	27	35	15	14	1	0	0	0	1	0
8018	67	18	4	18_4	B	20	7	43489	18	43614	1	32	32	15	13	2	0	0	0	1	0
8019	67	18	4	18_4	B	20	7	43489	19	43621	1	30	37	24	19	5	0	0	0	1	0
8020	67	18	4	18_4	B	20	7	43489	20	43628	1	26	50	20	20	0	0	0	0	1	0
8021	67	18	4	18_4	B	20	7	43489	21	43635	1	27	32	17	12	5	0	0	0	1	0
8022	67	18	4	18_4	B	20	7	43489	22	43642	1	25	35	18	17	1	0	0	0	1	0
8023	67	18	4	18_4	B	20	7	43489	23	43649	1	25	28	26	26	0	0	0	0	1	0
8024	67	18	4	18_4	B	20	7	43489	24	43656	1	28	31	32	30	2	0	0	0	1	0
8025	67	18	4	18_4	B	20	7	43489	25	43663	1	31	24	10	10	0	0	0	0	1	0
8026	67	18	4	18_4	B	20	7	43489	26	43670	1	32	27	14	14	0	0	0	0	1	0
8027	67	18	4	18_4	B	20	7	43489	27	43677	1	20	36	37	33	4	0	0	0	1	0
8028	67	18	4	18_4	B	20	7	43489	28	43684	1	30	4	40	35	5	0	0	0	0	1
8029	67	18	4	18_4	B	20	7	43489	29	43691	1	47	0	35	35	0	0	0	0	0
8030	67	18	4	18_4	B	20	7	43489	30	43698	1	67	0	31	25	6	0	0	0	0
8031	67	18	4	18_4	B	20	7	43489	31	43705	1	69	0	26	24	2	0	0	0	0
8032	67	18	4	18_4	B	20	7	43489	32	43712	1	75	0	13	11	2	0	0	0	0
8401	67	18	3	18_3	B	20	1	43490	1	43495	0	20	0	0	0	0	0	0	0	1	0
8402	67	18	3	18_3	B	20	1	43490	2	43502	0	21	0	0	0	0	0	0	0	1	0
8403	67	18	3	18_3	B	20	1	43490	3	43509	0	17	5	0	0	0	0	0	3	1	0
8404	67	18	3	18_3	B	20	1	43490	4	43516	1	19	6	0	0	0	0	0	1	1	0
8405	67	18	3	18_3	B	20	1	43490	5	43523	1	20	7	0	0	0	0	0	0	1	0
8406	67	18	3	18_3	B	20	1	43490	6	43530	1	16	9	5	5	0	0	0	4	1	0
8407	67	18	3	18_3	B	20	1	43490	7	43537	1	21	15	10	10	0	0	0	0	1	0
8408	67	18	3	18_3	B	20	1	43490	8	43544	1	22	24	13	13	0	0	0	0	1	0
8409	67	18	3	18_3	B	20	1	43490	9	43551	1	28	12	12	12	0	0	0	0	1	0
8410	67	18	3	18_3	B	20	1	43490	10	43558	1	27	9	15	15	0	0	0	0	1	0
8411	67	18	3	18_3	B	20	1	43490	11	43565	1	26	7	29	26	1	2	0	0	1	0
8412	67	18	3	18_3	B	20	1	43490	12	43572	1	29	4	25	20	5	0	0	0	1	0
8413	67	18	3	18_3	B	20	1	43490	13	43579	1	40	4	13	11	2	0	0	0	1	0
8414	67	18	3	18_3	B	20	1	43490	14	43586	1	20	5	9	9	0	0	0	0	1	0
8415	67	18	3	18_3	B	20	1	43490	15	43593	1	30	4	6	5	1	0	0	0	1	0
8416	67	18	3	18_3	B	20	1	43490	16	43600	1	23	7	7	6	1	0	0	0	1	0
8417	67	18	3	18_3	B	20	1	43490	17	43607	1	22	7	8	8	0	0	0	0	1	0
8418	67	18	3	18_3	B	20	1	43490	18	43614	1	23	8	6	6	0	0	0	0	1	0
8419	67	18	3	18_3	B	20	1	43490	19	43621	1	23	13	7	7	0	0	0	0	1	0
8420	67	18	3	18_3	B	20	1	43490	20	43628	1	21	13	14	11	1	2	0	0	1	0
8421	67	18	3	18_3	B	20	1	43490	21	43635	1	26	11	11	10	0	1	0	0	1	0
8422	67	18	3	18_3	B	20	1	43490	22	43642	1	24	7	13	13	0	0	0	0	1	0
8423	67	18	3	18_3	B	20	1	43490	23	43649	1	28	11	19	19	0	0	0	0	1	0
8424	67	18	3	18_3	B	20	1	43490	24	43656	1	28	10	24	23	0	1	0	0	1	0
8425	67	18	3	18_3	B	20	1	43490	25	43663	1	28	12	22	21	1	0	0	0	1	0
8426	67	18	3	18_3	B	20	1	43490	26	43670	1	33	12	19	19	0	0	0	0	1	0
8427	67	18	3	18_3	B	20	1	43490	27	43677	1	32	13	15	12	1	2	0	0	1	0
8428	67	18	3	18_3	B	20	1	43490	28	43684	1	27	14	15	11	1	3	0	0	1	0
8429	67	18	3	18_3	B	20	1	43490	29	43691	1	24	9	15	12	3	0	0	0	1	0
8430	67	18	3	18_3	B	20	1	43490	30	43698	1	27	16	25	22	2	1	0	0	1	0
8431	67	18	3	18_3	B	20	1	43490	31	43705	1	28	7	31	29	0	2	0	0	1	0
8432	67	18	3	18_3	B	20	1	43490	32	43712	1	37	2	29	25	3	1	0	0	1	0
8433	67	18	3	18_3	B	20	1	43490	33	43719	1	49	0	33	28	5	0	0	0	1	0
8434	67	18	3	18_3	B	20	1	43490	34	43726	1	29	0	24	20	1	3	0	0	0	1
8435	67	18	3	18_3	B	20	1	43490	35	43733	1	41	0	18	8	9	1	0	0	0
8436	67	18	3	18_3	B	20	1	43490	36	43740	1	40	0	5	3	2	0	0	0	0
8561	67	18	10	18_10	B	20	38	43531	1	43537	0	20	0	2	2	0	0	0	0	1	0
8562	67	18	10	18_10	B	20	38	43531	2	43544	1	17	5	3	3	0	0	0	4	1	0
8563	67	18	10	18_10	B	20	38	43531	3	43551	1	21	6	1	1	0	0	0	0	1	0
8564	67	18	10	18_10	B	20	38	43531	4	43558	1	22	6	0	0	0	0	0	0	1	0
8565	67	18	10	18_10	B	20	38	43531	5	43565	1	19	10	1	1	0	0	0	0	1	0
8566	67	18	10	18_10	B	20	38	43531	6	43572	1	19	7	4	4	0	0	0	0	1	0
8567	67	18	10	18_10	B	20	38	43531	7	43579	1	15	6	7	7	0	0	0	4	1	0
8568	67	18	10	18_10	B	20	38	43531	8	43586	1	20	2	5	5	0	0	0	0	1	0
8569	67	18	10	18_10	B	20	38	43531	9	43593	1	14	11	2	2	0	0	0	6	1	0
8570	67	18	10	18_10	B	20	38	43531	10	43600	1	23	13	6	5	0	1	0	0	1	0
8571	67	18	10	18_10	B	20	38	43531	11	43607	1	20	5	5	3	2	0	0	0	1	0
8572	67	18	10	18_10	B	20	38	43531	12	43614	1	19	5	2	2	0	0	0	0	1	0
8573	67	18	10	18_10	B	20	38	43531	13	43621	1	17	5	3	3	0	0	0	0	1	0
8574	67	18	10	18_10	B	20	38	43531	14	43628	1	22	8	4	4	0	0	0	0	1	0
8575	67	18	10	18_10	B	20	38	43531	15	43635	1	19	5	2	2	0	0	0	0	1	0
8576	67	18	10	18_10	B	20	38	43531	16	43642	1	18	9	3	2	1	0	0	0	1	0
8577	67	18	10	18_10	B	20	38	43531	17	43649	1	20	8	3	3	0	0	0	0	1	0
8578	67	18	10	18_10	B	20	38	43531	18	43656	1	16	4	4	4	0	0	0	4	1	0
8579	67	18	10	18_10	B	20	38	43531	19	43663	1	23	7	4	4	0	0	0	0	1	0
8580	67	18	10	18_10	B	20	38	43531	20	43670	1	19	3	7	7	0	0	0	0	1	0
8581	67	18	10	18_10	B	20	38	43531	21	43677	1	20	0	8	7	1	0	0	0	0	1
8582	67	18	10	18_10	B	20	38	43531	22	43684	1	21	0	5	4	1	0	0	0	0
8583	67	18	10	18_10	B	20	38	43531	23	43691	1	21	0	3	1	2	0	0	0	0
9921	63	48	4	48_4	B	20	23	43504	1	43511	0	20	2	1	1	0	0	0	0	1	0
9922	63	48	4	48_4	B	20	23	43504	2	43518	1	20	3	5	5	0	0	0	0	1	0
9923	63	48	4	48_4	B	20	23	43504	3	43525	1	20	9	0	0	0	0	0	0	1	0
9924	63	48	4	48_4	B	20	23	43504	4	43532	1	17	8	4	4	0	0	0	3	1	0
9925	63	48	4	48_4	B	20	23	43504	5	43539	1	18	11	5	5	0	0	0	2	1	0
9926	63	48	4	48_4	B	20	23	43504	6	43546	1	21	18	12	12	0	0	0	0	1	0
9927	63	48	4	48_4	B	20	23	43504	7	43553	1	22	20	14	14	0	0	0	0	1	0
9928	63	48	4	48_4	B	20	23	43504	8	43560	1	30	24	14	14	0	0	0	0	1	0
9929	63	48	4	48_4	B	20	23	43504	9	43567	1	23	15	27	26	0	1	0	0	1	0
9930	63	48	4	48_4	B	20	23	43504	10	43574	1	32	6	37	33	2	2	0	0	1	0
9931	63	48	4	48_4	B	20	23	43504	11	43581	1	33	10	35	33	0	2	0	0	1	0
9932	63	48	4	48_4	B	20	23	43504	12	43588	1	42	4	34	25	8	1	0	0	1	0
9933	63	48	4	48_4	B	20	23	43504	13	43595	1	36	10	19	19	0	0	0	0	1	0
9934	63	48	4	48_4	B	20	23	43504	14	43602	1	32	16	16	10	5	1	0	0	1	0
9935	63	48	4	48_4	B	20	23	43504	15	43609	1	26	16	10	8	2	0	0	0	1	0
9936	63	48	4	48_4	B	20	23	43504	16	43616	1	24	16	19	16	2	1	0	0	1	0
9937	63	48	4	48_4	B	20	23	43504	17	43623	1	23	14	21	21	0	0	0	0	1	0
9938	63	48	4	48_4	B	20	23	43504	18	43630	1	32	27	33	32	0	1	0	0	1	0
9939	63	48	4	48_4	B	20	23	43504	19	43637	1	35	20	36	31	4	1	0	0	1	0
9940	63	48	4	48_4	B	20	23	43504	20	43644	1	35	18	25	25	0	0	0	0	1	0
9941	63	48	4	48_4	B	20	23	43504	21	43651	1	34	10	51	38	8	5	0	0	1	0
9942	63	48	4	48_4	B	20	23	43504	22	43658	1	37	22	26	26	0	0	0	0	1	0
9943	63	48	4	48_4	B	20	23	43504	23	43665	1	41	8	39	32	7	0	0	0	1	0
9944	63	48	4	48_4	B	20	23	43504	24	43672	1	42	17	21	16	4	1	0	0	1	0
9945	63	48	4	48_4	B	20	23	43504	25	43679	1	31	14	25	16	6	3	0	0	1	0
9946	63	48	4	48_4	B	20	23	43504	26	43686	1	30	6	36	27	7	2	0	0	0	1
9947	63	48	4	48_4	B	20	23	43504	27	43693	1	38	0	31	18	9	4	0	0	0
9948	63	48	4	48_4	B	20	23	43504	28	43700	1	51	0	27	17	8	2	0	0	0
9949	63	48	4	48_4	B	20	23	43504	29	43707	1	57	0	24	20	4	0	0	0	0
9950	63	48	4	48_4	B	20	23	43504	30	43714	1	61	0	19	14	5	0	0	0	0
10401	64	41	15	41_15	B	20	25	43574	1	43581	0	18	0	3	3	0	0	0	0	1	0
10402	64	41	15	41_15	B	20	25	43574	2	43588	1	21	4	0	0	0	0	0	0	1	0
10403	64	41	15	41_15	B	20	25	43574	3	43595	1	19	8	0	0	0	0	0	0	1	0
10404	64	41	15	41_15	B	20	25	43574	4	43602	1	18	3	0	0	0	0	0	2	1	0
10405	64	41	15	41_15	B	20	25	43574	5	43609	1	16	6	0	0	0	0	0	4	1	0
10406	64	41	15	41_15	B	20	25	43574	6	43616	1	19	5	5	5	0	0	0	0	1	0
10407	64	41	15	41_15	B	20	25	43574	7	43623	1	18	1	9	9	0	0	0	0	1	0
10408	64	41	15	41_15	B	20	25	43574	8	43630	1	17	0	9	9	0	0	0	0	0	1
10409	64	41	15	41_15	B	20	25	43574	9	43637	1	24	0	6	6	0	0	0	0	0
10410	64	41	15	41_15	B	20	25	43574	10	43644	1	20	0	6	6	0	0	0	0	0
10481	64	41	16	41_16	B	20	28	43508	1	43518	1	27	9	2	2	0	0	0	0	1	0
10482	64	41	16	41_16	B	20	28	43508	2	43525	1	17	3	0	0	0	0	0	0	1	0
10483	64	41	16	41_16	B	20	28	43508	3	43532	1	21	6	0	0	0	0	0	0	1	0
10484	64	41	16	41_16	B	20	28	43508	4	43539	1	20	11	1	1	0	0	0	0	1	0
10485	64	41	16	41_16	B	20	28	43508	5	43546	1	20	9	4	4	0	0	0	0	1	0
10486	64	41	16	41_16	B	20	28	43508	6	43553	1	21	15	8	8	0	0	0	0	1	0
10487	64	41	16	41_16	B	20	28	43508	7	43560	1	23	15	14	14	0	0	0	0	1	0
10488	64	41	16	41_16	B	20	28	43508	8	43567	1	28	13	19	19	0	0	0	0	1	0
10489	64	41	16	41_16	B	20	28	43508	9	43574	1	28	8	24	24	0	0	0	0	1	0
10490	64	41	16	41_16	B	20	28	43508	10	43581	1	32	10	33	26	6	1	0	0	1	0
10491	64	41	16	41_16	B	20	28	43508	11	43588	1	38	6	30	28	2	0	0	0	1	0
10492	64	41	16	41_16	B	20	28	43508	12	43595	1	34	0	20	15	5	0	0	0	1	0
10493	64	41	16	41_16	B	20	28	43508	13	43602	1	35	4	9	6	3	0	0	0	1	0
10494	64	41	16	41_16	B	20	28	43508	14	43609	1	20	10	7	6	1	0	0	0	1	0
10495	64	41	16	41_16	B	20	28	43508	15	43616	1	22	10	3	3	0	0	0	0	1	0
10496	64	41	16	41_16	B	20	28	43508	16	43623	1	23	12	1	1	0	0	0	0	1	0
10497	64	41	16	41_16	B	20	28	43508	17	43630	1	20	11	0	0	0	0	0	0	1	0
10498	64	41	16	41_16	B	20	28	43508	18	43637	1	20	14	2	2	0	0	0	0	1	0
10499	64	41	16	41_16	B	20	28	43508	19	43644	1	19	22	2	2	0	0	0	0	1	0
10500	64	41	16	41_16	B	20	28	43508	20	43651	1	20	20	3	3	0	0	0	0	1	0
10501	64	41	16	41_16	B	20	28	43508	21	43658	1	21	22	9	9	0	0	0	0	1	0
10502	64	41	16	41_16	B	20	28	43508	22	43665	1	20	22	10	10	0	0	0	0	1	0
10503	64	41	16	41_16	B	20	28	43508	23	43672	1	24	24	17	17	0	0	0	0	1	0
10504	64	41	16	41_16	B	20	28	43508	24	43679	1	24	20	29	23	3	3	0	0	1	0
10505	64	41	16	41_16	B	20	28	43508	25	43686	1	21	3	34	29	2	3	0	0	1	0
10506	64	41	16	41_16	B	20	28	43508	26	43693	1	34	21	32	30	0	2	0	0	1	0
10507	64	41	16	41_16	B	20	28	43508	27	43700	1	38	0	18	11	3	4	0	0	0	1
10508	64	41	16	41_16	B	20	28	43508	28	43707	1	34	0	15	5	10	0	0	0	0
10509	64	41	16	41_16	B	20	28	43508	29	43714	1	39	0	14	0	14	0	0	0	0
10721	64	48	3	48_3	B	20	27	43574	1	43581	0	20	0	2	2	0	0	0	0	1	0
10722	64	48	3	48_3	B	20	27	43574	2	43588	1	19	0	0	0	0	0	0	0	1	0
10723	64	48	3	48_3	B	20	27	43574	3	43595	1	21	5	0	0	0	0	0	0	1	0
10724	64	48	3	48_3	B	20	27	43574	4	43602	1	21	1	0	0	0	0	0	0	1	0
10725	64	48	3	48_3	B	20	27	43574	5	43609	1	19	6	2	2	0	0	0	0	1	0
10726	64	48	3	48_3	B	20	27	43574	6	43616	1	19	14	7	7	0	0	0	0	1	0
10727	64	48	3	48_3	B	20	27	43574	7	43623	1	20	9	14	14	0	0	0	0	1	0
10728	64	48	3	48_3	B	20	27	43574	8	43630	1	25	12	8	7	0	1	0	0	1	0
10729	64	48	3	48_3	B	20	27	43574	9	43637	1	21	2	11	9	2	0	0	0	1	0
10730	64	48	3	48_3	B	20	27	43574	10	43644	1	25	0	11	11	0	0	0	0	0	1
10731	64	48	3	48_3	B	20	27	43574	11	43651	1	30	0	16	16	0	0	0	0	0
10732	64	48	3	48_3	B	20	27	43574	12	43658	1	39	0	7	6	1	0	0	0	0
10733	64	48	3	48_3	B	20	27	43574	13	43665	1	45	0	1	1	0	0	0	0	0
11201	64	18	6	18_6	B	20	20	43510	1	43518	1	20	0	1	1	0	0	0	0	1	0
11202	64	18	6	18_6	B	20	20	43510	2	43525	1	16	0	2	2	0	0	0	2	1	0
11203	64	18	6	18_6	B	20	20	43510	3	43532	1	16	5	0	0	0	0	0	4	1	0
11204	64	18	6	18_6	B	20	20	43510	4	43539	1	18	4	0	0	0	0	0	2	1	0
11205	64	18	6	18_6	B	20	20	43510	5	43546	1	17	4	2	2	0	0	0	3	1	0
11206	64	18	6	18_6	B	20	20	43510	6	43553	1	18	4	6	6	0	0	0	1	1	0
11207	64	18	6	18_6	B	20	20	43510	7	43560	1	19	4	5	5	0	0	0	1	1	0
11208	64	18	6	18_6	B	20	20	43510	8	43567	1	22	5	5	5	0	0	0	0	1	0
11209	64	18	6	18_6	B	20	20	43510	9	43574	1	24	4	3	3	0	0	0	0	1	0
11210	64	18	6	18_6	B	20	20	43510	10	43581	1	19	7	1	1	0	0	0	0	1	0
11211	64	18	6	18_6	B	20	20	43510	11	43588	1	22	6	4	4	0	0	0	0	1	0
11212	64	18	6	18_6	B	20	20	43510	12	43595	1	19	10	3	3	0	0	0	0	1	0
11213	64	18	6	18_6	B	20	20	43510	13	43602	1	19	10	3	2	1	0	0	0	1	0
11214	64	18	6	18_6	B	20	20	43510	14	43609	1	19	11	3	3	0	0	0	0	1	0
11215	64	18	6	18_6	B	20	20	43510	15	43616	1	20	10	6	6	0	0	0	0	1	0
11216	64	18	6	18_6	B	20	20	43510	16	43623	1	23	10	5	5	0	0	0	0	1	0
11217	64	18	6	18_6	B	20	20	43510	17	43630	1	18	10	4	4	0	0	0	1	1	0
11218	64	18	6	18_6	B	20	20	43510	18	43637	1	18	7	8	6	2	0	0	0	1	0
11219	64	18	6	18_6	B	20	20	43510	19	43644	1	19	8	13	13	0	0	0	0	1	0
11220	64	18	6	18_6	B	20	20	43510	20	43651	1	23	13	13	12	1	0	0	0	1	0
11221	64	18	6	18_6	B	20	20	43510	21	43658	1	26	15	11	11	0	0	0	0	1	0
11222	64	18	6	18_6	B	20	20	43510	22	43665	1	27	18	11	10	0	1	0	0	1	0
11223	64	18	6	18_6	B	20	20	43510	23	43672	1	24	19	10	10	0	0	0	0	1	0
11224	64	18	6	18_6	B	20	20	43510	24	43679	1	23	17	10	7	1	2	0	0	1	0
11225	64	18	6	18_6	B	20	20	43510	25	43686	1	24	13	13	12	1	0	0	0	1	0
11226	64	18	6	18_6	B	20	20	43510	26	43693	1	24	12	11	9	1	1	0	0	1	0
11227	64	18	6	18_6	B	20	20	43510	27	43700	1	26	10	6	5	1	0	0	0	1	0
11228	64	18	6	18_6	B	20	20	43510	28	43707	1	23	9	10	6	3	1	0	0	1	0
11229	64	18	6	18_6	B	20	20	43510	29	43714	1	23	11	11	9	2	0	0	0	1	0
11230	64	18	6	18_6	B	20	20	43510	30	43721	1	29	14	6	4	2	0	0	0	1	0
11231	64	18	6	18_6	B	20	20	43510	31	43728	1	21	15	4	4	0	0	0	0	1	0
11232	64	18	6	18_6	B	20	20	43510	32	43735	1	19	3	3	1	2	0	0	0	1	0
11233	64	18	6	18_6	B	20	20	43510	33	43742	1	20	6	2	0	2	0	0	0	1	0
11234	64	18	6	18_6	B	20	20	43510	34	43749	1	19	2	7	0	6	1	0	0	0	1
11235	64	18	6	18_6	B	20	20	43510	35	43756	1	17	0	3	0	3	0	0	0	0
11236	64	18	6	18_6	B	20	20	43510	36	43763	1	13	0	3	0	2	1	0	0	0
11237	64	18	6	18_6	B	20	20	43510	37	43770	1	13	0	1	0	1	0	0	0	0
11238	64	18	6	18_6	B	20	20	43510	38	43777	1	11	0	2	0	2	0	0	0	0
11239	64	18	6	18_6	B	20	20	43510	39	43784	1	9	0	2	0	2	0	0	0	0
12001	65	48	14	48_14	E	20	15	43560	1	43567	1	17	0	1	1	0	0	0	3	1	0
12002	65	48	14	48_14	E	20	15	43560	2	43574	1	20	5	1	1	0	0	0	0	1	0
12003	65	48	14	48_14	E	20	15	43560	3	43581	1	19	9	1	1	0	0	0	0	1	0
12004	65	48	14	48_14	E	20	15	43560	4	43588	1	18	4	0	0	0	0	0	2	1	0
12005	65	48	14	48_14	E	20	15	43560	5	43595	1	17	8	0	0	0	0	0	3	1	0
12006	65	48	14	48_14	E	20	15	43560	6	43602	1	19	12	1	1	0	0	0	0	1	0
12007	65	48	14	48_14	E	20	15	43560	7	43609	1	20	10	3	3	0	0	0	0	1	0
12008	65	48	14	48_14	E	20	15	43560	8	43616	1	20	19	7	7	0	0	0	0	1	0
12009	65	48	14	48_14	E	20	15	43560	9	43623	1	20	20	9	9	0	0	0	0	1	0
12010	65	48	14	48_14	E	20	15	43560	10	43630	1	22	19	17	17	0	0	0	0	1	0
12011	65	48	14	48_14	E	20	15	43560	11	43637	1	27	23	15	12	3	0	0	0	1	0
12012	65	48	14	48_14	E	20	15	43560	12	43644	1	26	32	21	15	6	0	0	0	1	0
12013	65	48	14	48_14	E	20	15	43560	13	43651	1	25	33	34	26	7	1	0	0	1	0
12014	65	48	14	48_14	E	20	15	43560	14	43658	1	33	27	22	19	3	0	0	0	1	0
12015	65	48	14	48_14	E	20	15	43560	15	43665	1	29	38	34	29	5	0	0	0	1	0
12016	65	48	14	48_14	E	20	15	43560	16	43672	1	32	37	46	39	6	1	0	0	1	0
12017	65	48	14	48_14	E	20	15	43560	17	43679	1	28	46	45	39	6	0	0	0	1	0
12018	65	48	14	48_14	E	20	15	43560	18	43686	1	45	25	41	39	0	2	0	0	1	0
12019	65	48	14	48_14	E	20	15	43560	19	43693	1	48	7	38	34	4	0	0	0	1	0
12020	65	48	14	48_14	E	20	15	43560	20	43700	1	38	0	46	39	6	1	0	0	0	1
12021	65	48	14	48_14	E	20	15	43560	21	43707	1	60	0	51	40	10	1	0	0	0
12022	65	48	14	48_14	E	20	15	43560	22	43714	1	68	0	52	46	6	0	0	0	0
12023	65	48	14	48_14	E	20	15	43560	23	43721	1	91	0	9	9	0	0	0	0	0
12641	65	48	15	48_15	E	20	28	43529	1	43539	1	20	1	3	3	0	0	0	0	1	0
12642	65	48	15	48_15	E	20	28	43529	2	43546	1	20	6	3	3	0	0	0	0	1	0
12643	65	48	15	48_15	E	20	28	43529	3	43553	1	19	6	1	1	0	0	0	0	1	0
12644	65	48	15	48_15	E	20	28	43529	4	43560	1	19	9	0	0	0	0	0	0	1	0
12645	65	48	15	48_15	E	20	28	43529	5	43567	1	15	10	4	4	0	0	0	0	1	0
12646	65	48	15	48_15	E	20	28	43529	6	43574	1	16	11	9	9	0	0	0	4	1	0
12647	65	48	15	48_15	E	20	28	43529	7	43581	1	22	14	7	7	0	0	0	0	1	0
12648	65	48	15	48_15	E	20	28	43529	8	43588	1	25	8	10	10	0	0	0	0	1	0
12649	65	48	15	48_15	E	20	28	43529	9	43595	1	25	6	11	11	0	0	0	0	1	0
12650	65	48	15	48_15	E	20	28	43529	10	43602	1	26	4	14	12	1	1	0	0	1	0
12651	65	48	15	48_15	E	20	28	43529	11	43609	1	21	0	12	11	1	0	0	0	1	0
12652	65	48	15	48_15	E	20	28	43529	12	43616	1	28	0	7	7	0	0	0	0	1	0
12653	65	48	15	48_15	E	20	28	43529	13	43623	1	27	0	3	2	1	0	0	0	1	0
12654	65	48	15	48_15	E	20	28	43529	14	43630	1	25	0	2	1	1	0	0	0	0	1
12721	65	48	1	48_1	E	20	30	43595	1	43602	0	21	0	1	1	0	0	0	0	1	0
12722	65	48	1	48_1	E	20	30	43595	2	43609	1	20	4	2	2	0	0	0	0	1	0
12723	65	48	1	48_1	E	20	30	43595	3	43616	1	20	6	3	3	0	0	0	0	1	0
12724	65	48	1	48_1	E	20	30	43595	4	43623	1	19	6	2	2	0	0	0	0	1	0
12725	65	48	1	48_1	E	20	30	43595	5	43630	1	17	7	2	2	0	0	0	3	1	0
12726	65	48	1	48_1	E	20	30	43595	6	43637	1	19	12	8	8	0	0	0	0	1	0
12727	65	48	1	48_1	E	20	30	43595	7	43644	1	21	16	11	11	0	0	0	0	1	0
12728	65	48	1	48_1	E	20	30	43595	8	43651	1	26	21	13	12	0	1	0	0	1	0
12729	65	48	1	48_1	E	20	30	43595	9	43658	1	24	19	13	10	2	1	0	0	1	0
12730	65	48	1	48_1	E	20	30	43595	10	43665	1	24	22	21	16	3	2	0	0	1	0
12731	65	48	1	48_1	E	20	30	43595	11	43672	1	29	19	24	20	4	0	0	0	1	0
12732	65	48	1	48_1	E	20	30	43595	12	43679	1	30	13	25	20	5	0	0	0	1	0
12733	65	48	1	48_1	E	20	30	43595	13	43686	1	32	17	30	25	5	0	0	0	1	0
12734	65	48	1	48_1	E	20	30	43595	14	43693	1	29	11	28	24	4	0	0	0	1	0
12735	65	48	1	48_1	E	20	30	43595	15	43700	1	38	24	29	25	3	1	0	0	1	0
12736	65	48	1	48_1	E	20	30	43595	16	43707	1	23	30	37	32	4	1	0	0	1	0
12737	65	48	1	48_1	E	20	30	43595	17	43714	1	37	23	22	18	4	0	0	0	1	0
12738	65	48	1	48_1	E	20	30	43595	18	43721	1	39	24	22	19	3	0	0	0	1	0
12739	65	48	1	48_1	E	20	30	43595	19	43728	1	31	28	16	16	0	0	0	0	1	0
12740	65	48	1	48_1	E	20	30	43595	20	43735	1	23	29	21	19	2	0	0	0	1	0
12741	65	48	1	48_1	E	20	30	43595	21	43742	1	28	24	27	26	1	0	0	0	1	0
12742	65	48	1	48_1	E	20	30	43595	22	43749	1	25	28	27	23	3	1	0	0	1	0
12743	65	48	1	48_1	E	20	30	43595	23	43756	1	39	24	25	20	5	0	0	0	1	0
12744	65	48	1	48_1	E	20	30	43595	24	43763	1	34	9	46	44	1	1	0	0	0	1
12745	65	48	1	48_1	E	20	30	43595	25	43770	1	40	2	43	40	3	0	0	0	0
12746	65	48	1	48_1	E	20	30	43595	26	43777	1	77	0	40	40	0	0	0	0	0
12747	65	48	1	48_1	E	20	30	43595	27	43784	1	38	0	30	25	3	2	0	0	0
12748	65	48	1	48_1	E	20	30	43595	28	43791	1	51	0	3	1	2	0	0	0	0
12961	65	48	18	48_18	B	20	34	43529	1	43539	1	13	4	4	4	0	0	0	5	1	0
12962	65	48	18	48_18	B	20	34	43529	2	43546	1	13	4	4	4	0	0	0	5	1	0
12963	65	48	18	48_18	B	20	34	43529	3	43553	1	20	5	1	1	0	0	0	0	1	0
12964	65	48	18	48_18	B	20	34	43529	4	43560	1	19	8	0	0	0	0	0	0	1	0
12965	65	48	18	48_18	B	20	34	43529	5	43567	1	18	11	5	5	0	0	0	2	1	0
12966	65	48	18	48_18	B	20	34	43529	6	43574	1	16	11	8	8	0	0	0	3	1	0
12967	65	48	18	48_18	B	20	34	43529	7	43581	1	21	16	9	9	0	0	0	0	1	0
12968	65	48	18	48_18	B	20	34	43529	8	43588	1	20	13	9	9	0	0	0	0	1	0
12969	65	48	18	48_18	B	20	34	43529	9	43595	1	23	17	18	18	0	0	0	0	1	0
12970	65	48	18	48_18	B	20	34	43529	10	43602	1	28	21	27	22	2	3	0	0	1	0
12971	65	48	18	48_18	B	20	34	43529	11	43609	1	32	6	32	27	3	2	0	0	1	0
12972	65	48	18	48_18	B	20	34	43529	12	43616	1	33	3	33	31	2	0	0	0	1	0
12973	65	48	18	48_18	B	20	34	43529	13	43623	1	32	2	34	27	7	0	0	0	1	0
12974	65	48	18	48_18	B	20	34	43529	14	43630	1	38	3	25	18	7	0	0	0	1	0
12975	65	48	18	48_18	B	20	34	43529	15	43637	1	35	3	13	8	5	0	0	0	1	0
12976	65	48	18	48_18	B	20	34	43529	16	43644	1	28	4	3	1	2	0	0	0	1	0
12977	65	48	18	48_18	B	20	34	43529	17	43651	1	27	8	3	1	2	0	0	0	1	0
12978	65	48	18	48_18	B	20	34	43529	18	43658	1	22	5	4	4	0	0	0	0	1	0
12979	65	48	18	48_18	B	20	34	43529	19	43665	1	20	10	5	4	0	1	0	0	1	0
12980	65	48	18	48_18	B	20	34	43529	20	43672	1	24	9	8	7	1	0	0	0	1	0
12981	65	48	18	48_18	B	20	34	43529	21	43679	1	21	12	9	8	1	0	0	0	1	0
12982	65	48	18	48_18	B	20	34	43529	22	43686	1	28	12	12	11	0	1	0	0	1	0
12983	65	48	18	48_18	B	20	34	43529	23	43693	1	20	13	16	14	2	0	0	0	1	0
12984	65	48	18	48_18	B	20	34	43529	24	43700	1	28	16	22	13	7	2	0	0	1	0
12985	65	48	18	48_18	B	20	34	43529	25	43707	1	23	12	16	5	10	1	0	0	1	0
12986	65	48	18	48_18	B	20	34	43529	26	43714	1	20	11	13	0	12	1	0	0	1	0
12987	65	48	18	48_18	B	20	34	43529	27	43721	1	21	8	18	4	14	0	0	0	1	0
12988	65	48	18	48_18	B	20	34	43529	28	43728	1	17	13	13	4	8	1	0	0	1	0
12989	65	48	18	48_18	B	20	34	43529	29	43735	1	21	9	11	0	10	1	0	0	1	0
12990	65	48	18	48_18	B	20	34	43529	30	43742	1	16	4	7	0	6	1	0	4	1	0
12991	65	48	18	48_18	B	20	34	43529	31	43749	1	20	4	8	2	6	0	1	0	0	1
12992	65	48	18	48_18	B	20	34	43529	32	43756	1	18	0	8	2	6	0	0	0	0
12993	65	48	18	48_18	B	20	34	43529	33	43763	1	21	0	5	0	5	0	0	0	0
12994	65	48	18	48_18	B	20	34	43529	34	43770	1	17	0	1	0	1	0	0	0	0
12995	65	48	18	48_18	B	20	34	43529	35	43777	1	14	0	2	0	2	0	0	0	0
	65	48	5	48_5	B	20	32b	43529	1	43539	1	19	2	7	7	0	0	0	1	1	0
	65	48	5	48_5	B	20	32b	43529	2	43546	1	20	8	5	5	0	0	0	0	1	0
	65	48	5	48_5	B	20	32b	43529	3	43553	1	24	7	0	0	0	0	0	0	1	0
	65	48	5	48_5	B	20	32b	43529	4	43560	1	20	6	0	0	0	0	0	0	1	0
	65	48	5	48_5	B	20	32b	43529	5	43567	1	19	9	0	0	0	0	0	1	1	0
	65	48	5	48_5	B	20	32b	43529	6	43574	1	21	9	3	3	0	0	0	0	1	0
	65	48	5	48_5	B	20	32b	43529	7	43581	1	17	9	5	5	0	0	0	3	1	0
	65	48	5	48_5	B	20	32b	43529	8	43588	1	21	9	6	6	0	0	0	0	1	0
	65	48	5	48_5	B	20	32b	43529	9	43595	1	21	2	10	10	0	0	0	0	0	1
321	56	48	4	48_4	A	30	5	43479	1	43486	0	30	0	0	0	0	0	0	0	1	0
322	56	48	4	48_4	A	30	5	43479	2	43493	0	30	0	0	0	0	0	0	0	1	0
323	56	48	4	48_4	A	30	5	43479	3	43500	1	28	3	0	0	0	0	0	2	1	0
324	56	48	4	48_4	A	30	5	43479	4	43507	1	30	8	4	4	0	0	0	0	1	0
325	56	48	4	48_4	A	30	5	43479	5	43514	1	28	7	6	6	0	0	0	2	1	0
326	56	48	4	48_4	A	30	5	43479	6	43521	1	28	9	5	5	0	0	0	0	1	0
327	56	48	4	48_4	A	30	5	43479	7	43528	1	27	12	9	9	0	0	0	0	1	0
328	56	48	4	48_4	A	30	5	43479	8	43535	1	32	24	12	12	0	0	0	0	1	0
329	56	48	4	48_4	A	30	5	43479	9	43542	1	32	13	13	13	0	0	0	0	1	0
330	56	48	4	48_4	A	30	5	43479	10	43549	1	38	22	19	19	0	0	0	0	1	0
331	56	48	4	48_4	A	30	5	43479	11	43556	1	34	23	17	14	3	0	0	0	1	0
332	56	48	4	48_4	A	30	5	43479	12	43563	1	30	17	28	23	4	1	0	0	1	0
333	56	48	4	48_4	A	30	5	43479	13	43570	1	37	6	30	27	3	0	0	0	1	0
334	56	48	4	48_4	A	30	5	43479	14	43577	1	43	5	42	35	7	0	0	0	1	0
335	56	48	4	48_4	A	30	5	43479	15	43584	1	48	4	32	28	4	0	0	0	1	0
336	56	48	4	48_4	A	30	5	43479	16	43591	1	48	8	22	21	1	0	0	0	1	0
337	56	48	4	48_4	A	30	5	43479	17	43598	1	40	6	14	12	2	0	0	0	1	0
338	56	48	4	48_4	A	30	5	43479	18	43605	1	38	6	9	8	1	0	0	0	1	0
339	56	48	4	48_4	A	30	5	43479	19	43612	1	34	8	7	7	0	0	0	0	1	0
340	56	48	4	48_4	A	30	5	43479	20	43619	1	31	2	6	6	0	0	0	0	1	0
341	56	48	4	48_4	A	30	5	43479	21	43626	1	35	4	6	5	0	1	0	0	1	0
342	56	48	4	48_4	A	30	5	43479	22	43633	1	30	6	6	5	1	0	0	0	1	0
343	56	48	4	48_4	A	30	5	43479	23	43640	1	31	6	6	6	0	0	0	0	1	0
344	56	48	4	48_4	A	30	5	43479	24	43647	1	36	3	8	7	0	1	0	0	0	1
345	56	48	4	48_4	A	30	5	43479	25	43654	1	34	0	12	10	1	1	0	0	0
346	56	48	4	48_4	A	30	5	43479	26	43661	1	39	0	9	7	1	1	0	0	0
347	56	48	4	48_4	A	30	5	43479	27	43668	1	45	0	4	2	2	0	0	0	0
348	56	48	4	48_4	A	30	5	43479	28	43675	1	35	0	2	0	2	0	0	0	0
641	56	34	2	34_2	A	30	7	43480	1	43486	0	30	0	0	0	0	0	0	0	1	0
642	56	34	2	34_2	A	30	7	43480	2	43493	0	30	0	0	0	0	0	0	0	1	0
643	56	34	2	34_2	A	30	7	43480	3	43500	1	35	5	0	0	0	0	0	0	1	0
644	56	34	2	34_2	A	30	7	43480	4	43507	1	30	6	6	6	0	0	0	0	1	0
645	56	34	2	34_2	A	30	7	43480	5	43514	1	36	15	3	3	0	0	0	0	1	0
646	56	34	2	34_2	A	30	7	43480	6	43521	1	36	15	6	6	0	0	0	0	1	0
647	56	34	2	34_2	A	30	7	43480	7	43528	1	31	23	11	11	0	0	0	0	1	0
648	56	34	2	34_2	A	30	7	43480	8	43535	1	38	27	17	17	0	0	0	0	1	0
649	56	34	2	34_2	A	30	7	43480	9	43542	1	38	16	18	18	0	0	0	0	1	0
650	56	34	2	34_2	A	30	7	43480	10	43549	1	38	33	28	28	0	0	0	0	1	0
651	56	34	2	34_2	A	30	7	43480	11	43556	1	44	27	34	31	0	3	0	0	1	0
652	56	34	2	34_2	A	30	7	43480	12	43563	1	40	47	53	48	4	1	0	0	1	0
653	56	34	2	34_2	A	30	7	43480	13	43570	1	55	43	58	50	7	0	1	0	1	0
654	56	34	2	34_2	A	30	7	43480	14	43577	1	53	42	69	61	7	1	0	0	1	0
655	56	34	2	34_2	A	30	7	43480	15	43584	1	54	48	76	68	7	1	0	0	1	0
656	56	34	2	34_2	A	30	7	43480	16	43591	1	67	46	83	69	11	3	0	0	1	0
657	56	34	2	34_2	A	30	7	43480	17	43598	1	72	63	83	79	4	0	0	0	1	0
658	56	34	2	34_2	A	30	7	43480	18	43605	1	80	42	85	75	5	5	0	0	1	0
659	56	34	2	34_2	A	30	7	43480	19	43612	1	60	50	97	85	7	5	0	0	1	0
660	56	34	2	34_2	A	30	7	43480	20	43619	1	81	25	81	81	0	0	0	0	1	0
661	56	34	2	34_2	A	30	7	43480	21	43626	1	78	33	103	86	15	2	0	0	1	0
662	56	34	2	34_2	A	30	7	43480	22	43633	1	70	42	97	82	9	6	0	0	1	0
663	56	34	2	34_2	A	30	7	43480	23	43640	1	78	29	85	65	13	7	0	0	1	0
664	56	34	2	34_2	A	30	7	43480	24	43647	1	75	40	92	69	16	7	0	0	1	0
665	56	34	2	34_2	A	30	7	43480	25	43654	1	70	36	79	56	12	11	0	0	1	0
666	56	34	2	34_2	A	30	7	43480	26	43661	1	60	12	65	33	15	17	0	0	1	0
667	56	34	2	34_2	A	30	7	43480	27	43668	1	47	22	47	25	10	12	0	0	1	0
668	56	34	2	34_2	A	30	7	43480	28	43675	1	30	21	48	20	10	18	0	0	1	0
669	56	34	2	34_2	A	30	7	43480	29	43682	1	47	21	22	9	4	9	0	0	1	0
670	56	34	2	34_2	A	30	7	43480	30	43689	1	31	25	31	14	0	17	0	0	1	0
671	56	34	2	34_2	A	30	7	43480	31	43696	1	33	13	22	8	1	13	0	0	1	0
672	56	34	2	34_2	A	30	7	43480	32	43703	1	34	11	25	4	1	20	0	0	1	0
673	56	34	2	34_2	A	30	7	43480	33	43710	1	27	20	14	1	0	13	0	2	1	0
674	56	34	2	34_2	A	30	7	43480	34	43717	1	25	20	4	1	0	3	0	5	1	0
675	56	34	2	34_2	A	30	7	43480	35	43724	1	27	4	11	1	0	9	1	2	1	0
676	56	34	2	34_2	A	30	7	43480	36	43731	1	30	7	21	0	0	17	4	0	1	0
677	56	34	2	34_2	A	30	7	43480	37	43738	1	25	25	13	0	0	7	6	5	1	0
678	56	34	2	34_2	A	30	7	43480	38	43745	1	29	15	0	0	0	0	0	0	0	1
679	56	34	2	34_2	A	30	7	43480	39	43752	1	25	0	0	0	0	0	0	0	0
680	56	34	2	34_2	A	30	7	43480	40	43759	1	26	0	20	0	0	15	5	0	0
681	56	34	2	34_2	A	30	7	43480	41	43766	1	24	0	13	0	0	11	2	0	0
801	56	34	2	34_2	A	30	14	43563	1	43570	0	27	1	1	1	0	0	0	0	1	0
802	56	34	2	34_2	A	30	14	43563	2	43577	1	25	6	3	3	0	0	0	0	1	0
803	56	34	2	34_2	A	30	14	43563	3	43584	1	29	8	2	2	0	0	0	0	1	0
804	56	34	2	34_2	A	30	14	43563	4	43591	1	33	11	0	0	0	0	0	0	1	0
805	56	34	2	34_2	A	30	14	43563	5	43598	1	25	17	1	1	0	0	0	5	1	0
806	56	34	2	34_2	A	30	14	43563	6	43605	1	32	17	7	7	0	0	0	0	1	0
807	56	34	2	34_2	A	30	14	43563	7	43612	1	30	22	6	6	0	0	0	0	1	0
808	56	34	2	34_2	A	30	14	43563	8	43619	1	35	13	4	4	0	0	0	0	1	0
809	56	34	2	34_2	A	30	14	43563	9	43626	1	30	18	7	6	1	0	0	0	1	0
810	56	34	2	34_2	A	30	14	43563	10	43633	1	30	20	10	10	0	0	0	0	1	0
811	56	34	2	34_2	A	30	14	43563	11	43640	1	33	26	20	16	4	0	0	0	1	0
812	56	34	2	34_2	A	30	14	43563	12	43647	1	33	34	22	18	4	0	0	0	1	0
813	56	34	2	34_2	A	30	14	43563	13	43654	1	31	32	32	31	0	1	0	0	1	0
814	56	34	2	34_2	A	30	14	43563	14	43661	1	42	28	36	31	4	1	0	0	1	0
815	56	34	2	34_2	A	30	14	43563	15	43668	1	52	35	37	32	5	0	0	0	1	0
816	56	34	2	34_2	A	30	14	43563	16	43675	1	42	32	37	31	6	0	0	0	1	0
817	56	34	2	34_2	A	30	14	43563	17	43682	1	41	2	38	30	7	1	0	0	1	0
818	56	34	2	34_2	A	30	14	43563	18	43689	1	43	0	34	27	6	1	0	0	0	1
819	56	34	2	34_2	A	30	14	43563	19	43696	1	53	0	18	16	2	0	0	0	0
820	56	34	2	34_2	A	30	14	43563	20	43703	1	55	0	20	14	6	0	0	0	0
821	56	34	2	34_2	A	30	14	43563	21	43710	1	60	0	6	6	0	0	0	0	0
822	56	34	2	34_2	A	30	14	43563	22	43717	1	58	0	1	0	1	0	0	0	0
961	56	34	4	34_4	D	30	7	43528	1	43535	0	31	0	9	9	0	0	0	0	1	0
962	56	34	4	34_4	D	30	7	43528	2	43542	1	30	6	6	6	0	0	0	0	1	0
963	56	34	4	34_4	D	30	7	43528	3	43549	1	34	7	1	1	0	0	0	0	1	0
964	56	34	4	34_4	D	30	7	43528	4	43556	1	30	8	0	0	0	0	0	0	1	0
965	56	34	4	34_4	D	30	7	43528	5	43563	1	29	8	3	3	0	0	0	0	1	0
966	56	34	4	34_4	D	30	7	43528	6	43570	1	27	10	10	10	0	0	0	3	1	0
967	56	34	4	34_4	D	30	7	43528	7	43577	1	30	24	13	13	0	0	0	0	1	0
[truncated: 883 more rows]
