# Supplementary material for: Late-life fitness gains and reproductive death in Cardiocondyla obscurior ants
Source: eLife. 2022 Apr 6;11:e74695. doi: 10.7554/eLife.74695 (PMC8986319; doi:10.7554/eLife.74695)
Supplement: Source data 2. [file elife-74695-data2.xlsx]

## Sheet: Sheet1
Source Data 2 - Weight in grams of 20 individual queens and workers.
Caste	No_ind	Weight_g
Queen	5	0.0003113
Queen	5	0.0003061
Queen	5	0.0003120
Queen	5	0.0002944
Queen	5	0.0002924
Queen	5	0.0003029
Queen	5	0.0003765
Queen	5	0.0003008
Queen	5	0.0003415
Queen	5	0.0003143
Worker	5	0.0001898
Worker	5	0.0001856
Worker	5	0.0002075
Worker	5	0.0001693
Worker	5	0.0002152
Worker	5	0.0001919
Worker	5	0.0001954
Worker	5	0.0002053
Worker	5	0.0002165
Worker	5	0.0002238
