# Supplementary material for: Late-life fitness gains and reproductive death in Cardiocondyla obscurior ants
Source: eLife. 2022 Apr 6;11:e74695. doi: 10.7554/eLife.74695 (PMC8986319; doi:10.7554/eLife.74695)
Supplement: Source data 3. [file elife-74695-data3.xlsx]

## Sheet: Sheet1
Source Data 3 - Worker's head width measurements (f1) and the respective code of the maternal line (f0).
Worker	MatColony	Collection	Replicate	Date Pinning	HW
1	B20_8	2019-07-15	1	2019-12-10	382.18
2	B20_8	2019-07-15	2	2019-12-10	NA
3	B20_8	2019-07-15	3	2019-12-10	375.54
4	B20_8	2019-07-15	4	2019-12-10	371.28
5	B20_8	2019-08-26	1	2019-12-10	371.93
6	B20_8	2019-08-26	2	2019-12-10	370.31
7	B20_8	2019-08-26	3	2019-12-10	366.84
8	B20_8	2019-08-26	4	2019-12-10	379.00
9	B20_8	2019-08-26	5	2019-12-10	350.55
10	B20_8	2019-09-16	1	2019-12-10	378.43
11	B20_8	2019-09-16	2	2019-12-10	386.68
12	B20_8	2019-09-16	3	2019-12-11	370.87
13	B20_8	2019-10-21	1	2019-12-11	387.00
14	B20_8	2019-10-21	2	2019-12-11	395.24
15	B20_8	2019-10-21	3	2019-12-11	392.37
16	E20_7	2019-07-15	1	2019-12-11	375.77
17	E20_7	2019-07-15	2	2019-12-11	377.44
18	E20_7	2019-07-15	3	2019-12-11	377.16
19	E20_7	2019-07-15	4	2019-12-11	NA
20	E20_7	2019-07-15	5	2019-12-11	387.14
21	E20_7	2019-08-26	1	2019-12-11	387.49
22	E20_7	2019-08-26	2	2019-12-11	372.19
23	E20_7	2019-08-26	3	2019-12-11	388.71
24	E20_7	2019-08-26	4	2019-12-11	367.23
25	E20_7	2019-08-26	5	2019-12-11	372.92
26	E20_7	2019-09-16	1	2019-12-11	395.23
27	E20_7	2019-09-16	2	2019-12-11	385.08
28	E20_7	2019-09-16	3	2019-12-11	389.11
29	E20_7	2019-09-16	4	2019-12-11	382.96
30	E20_7	2019-09-16	5	2019-12-11	388.91
31	E20_7	2019-10-21	1	2019-12-11	354.48
32	E20_7	2019-10-21	2	2019-12-11	367.58
33	E20_7	2019-10-21	3	2019-12-11	359.44
34	E20_20	2019-07-15	1	2019-12-11	387.17
35	E20_20	2019-07-15	2	2019-12-11	393.79
36	E20_20	2019-07-15	3	2019-12-11	377.03
37	E20_20	2019-07-15	4	2019-12-11	377.66
38	E20_20	2019-07-15	5	2019-12-11	382.38
39	E20_20	2019-08-19	1	2019-12-11	383.17
40	E20_20	2019-08-19	2	2019-12-11	388.78
41	E20_20	2019-08-19	3	2019-12-11	380.57
42	E20_20	2019-08-19	4	2019-12-11	388.92
43	E20_20	2019-08-19	5	2019-12-11	386.39
44	B20_28	2019-07-15	1	2019-12-11	379.47
45	B20_28	2019-07-15	2	2019-12-11	374.51
46	B20_28	2019-07-15	3	2019-12-11	374.70
47	B20_28	2019-07-15	4	2019-12-11	363.46
48	B20_28	2019-08-23	1	2019-12-11	383.58
49	B20_28	2019-08-23	2	2019-12-11	383.29
50	B20_28	2019-08-23	3	2019-12-11	379.08
51	B20_28	2019-08-23	4	2019-12-11	375.59
52	B20_28	2019-08-23	5	2019-12-11	378.34
53	B20_28	2019-08-23	6	2019-12-11	374.42
54	E20_19	2019-07-15	1	2019-12-11	382.95
55	E20_19	2019-07-15	2	2019-12-11	378.36
56	E20_19	2019-07-15	3	2019-12-11	375.78
57	E20_19	2019-07-15	4	2019-12-11	376.12
58	E20_19	2019-07-15	5	2019-12-11	391.51
59	E20_19	2019-08-19	1	2019-12-12	372.05
60	E20_19	2019-08-19	2	2019-12-12	379.58
61	E20_19	2019-08-19	3	2019-12-12	374.51
62	E20_19	2019-08-19	4	2019-12-12	384.12
63	E20_19	2019-08-19	5	2019-12-12	375.90
64	E20_19	2019-09-16	1	2019-12-12	372.17
65	E20_19	2019-09-16	2	2019-12-12	380.31
66	E20_19	2019-09-16	3	2019-12-12	371.16
67	E20_19	2019-10-21	1	2019-12-12	386.61
68	E20_19	2019-10-21	2	2019-12-12	385.05
69	E20_19	2019-10-21	3	2019-12-12	395.62
70	E20_19	2019-10-21	4	2019-12-12	386.59
71	B20_2	2019-07-15	1	2019-12-12	357.66
72	B20_2	2019-07-15	2	2019-12-12	357.69
73	B20_2	2019-07-15	3	2019-12-12	348.67
74	B20_2	2019-07-15	4	2019-12-12	356.88
75	B20_2	2019-07-15	5	2019-12-12	352.94
76	B20_2	2019-08-19	1	2019-12-12	372.61
77	B20_2	2019-08-19	2	2019-12-12	364.81
78	B20_2	2019-08-19	3	2019-12-12	376.27
79	B20_2	2019-08-19	4	2019-12-12	367.70
80	B20_2	2019-08-19	5	2019-12-12	360.39
81	B20_2	2019-09-16	1	2019-12-12	365.15
82	B20_2	2019-09-16	2	2019-12-12	360.33
83	B20_2	2019-09-16	3	2019-12-12	363.37
84	B20_2	2019-09-16	4	2019-12-12	378.02
85	B20_2	2019-10-14	1	2019-12-12	371.84
86	B20_2	2019-10-14	2	2019-12-12	357.88
87	B20_2	2019-10-14	3	2019-12-12	373.94
88	B20_2	2019-10-14	4	2019-12-12	378.51
89	B20_2	2019-10-14	5	2019-12-12	NA
90	B20_2	2019-11-11	1	2019-12-12	367.67
91	B20_2	2019-11-11	2	2019-12-12	358.08
92	B20_2	2019-11-11	3	2019-12-12	358.66
93	B20_2	2019-11-11	4	2019-12-12	364.70
94	E20_30	2019-08-16	1	2019-12-12	382.71
95	E20_30	2019-08-16	2	2019-12-12	380.73
96	E20_30	2019-08-16	3	2019-12-12	382.49
97	E20_30	2019-08-16	4	2019-12-12	382.06
98	E20_30	2019-08-16	5	2019-12-12	387.93
99	E20_30	2019-09-25	1	2019-12-12	372.79
100	E20_30	2019-09-25	2	2019-12-12	NA
101	E20_30	2019-09-25	3	2019-12-12	374.58
102	E20_30	2019-09-25	4	2019-12-12	368.26
103	E20_30	2019-10-18	1	2019-12-12	355.60
104	E20_30	2019-10-18	2	2019-12-12	373.87
105	E20_30	2019-10-18	3	2019-12-12	NA
106	E20_30	2019-10-18	4	2019-12-12	365.15
107	E20_30	2019-10-18	5	2019-12-12	378.45
108	B20_32	2019-08-16	1	2019-12-12	394.36
109	B20_32	2019-08-16	2	2019-12-12	401.61
110	B20_32	2019-08-16	3	2019-12-12	NA
111	B20_33	2019-08-16	4	2019-12-12	398.55
112	B20_32	2019-08-16	5	2019-12-12	390.80
113	B20_32	2019-09-25	1	2019-12-16	366.81
114	B20_32	2019-09-25	2	2019-12-16	370.89
115	B20_32	2019-09-25	3	2019-12-16	369.92
116	B20_32	2019-09-25	4	2019-12-16	376.82
117	B20_32	2019-09-25	5	2019-12-16	375.77
118	E20_13	2019-10-18	1	2019-12-16	389.79
119	E20_13	2019-10-18	2	2019-12-16	378.40
120	E20_13	2019-10-18	3	2019-12-16	376.42
121	E20_13	2019-10-18	4	2019-12-16	362.09
122	A30_6b	2019-08-29	1	2019-12-16	362.59
123	A30_6b	2019-08-29	2	2019-12-16	359.79
124	A30_6b	2019-08-29	3	2019-12-16	375.41
125	A30_6b	2019-08-29	4	2019-12-16	371.94
126	A30_6b	2019-08-29	5	2019-12-16	352.43
127	A30_6b	2019-08-30	1	2019-12-16	403.50
128	A30_6b	2019-08-30	2	2019-12-16	389.92
129	A30_6b	2019-08-30	3	2019-12-16	NA
130	A30_6b	2019-10-14	1	2019-12-16	393.13
131	A30_6b	2019-10-14	2	2019-12-16	380.40
132	A30_6b	2019-10-14	3	2019-12-16	385.84
133	A30_6b	2019-10-14	4	2019-12-16	374.53
134	A30_6b	2019-10-14	5	2019-12-16	377.39
135	A30_6b	2019-11-15	1	2019-12-16	383.68
136	A30_6b	2019-11-15	2	2019-12-16	379.72
137	A30_6b	2019-11-15	3	2019-12-16	385.17
138	A30_6b	2019-11-15	4	2019-12-17	383.22
139	A30_6b	2019-11-15	5	2019-12-17	372.93
140	A30_16	2019-07-17	1	2019-12-17	364.49
141	A30_16	2019-07-17	2	2019-12-17	369.91
142	A30_16	2019-07-17	3	2019-12-17	371.66
143	A30_16	2019-07-17	4	2019-12-17	376.88
144	A30_16	2019-07-17	5	2019-12-17	363.76
145	A30_16	2019-08-21	1	2019-12-17	376.48
146	A30_16	2019-08-21	2	2019-12-17	367.33
147	A30_16	2019-08-21	3	2019-12-17	380.03
148	A30_16	2019-08-21	4	2019-12-17	385.18
149	A30_16	2019-08-21	5	2019-12-17	362.50
150	A30_27	2019-08-23	1	2019-12-17	388.84
151	A30_27	2019-08-23	2	2019-12-17	392.64
152	A30_27	2019-08-23	3	2019-12-17	391.34
153	A30_27	2019-08-23	4	2019-12-17	391.79
154	A30_27	2019-08-23	5	2019-12-17	386.44
155	A30_27	2019-09-25	1	2019-12-17	407.12
156	A30_27	2019-09-25	2	2019-12-17	390.19
157	A30_27	2019-09-25	3	2019-12-17	407.12
158	A30_27	2019-09-25	4	2019-12-17	401.52
159	A30_27	2019-10-25	1	2019-12-17	393.80
160	A30_27	2019-10-25	2	2019-12-17	376.55
161	A30_27	2019-10-25	3	2019-12-17	378.45
162	A30_27	2019-10-25	4	2019-12-17	NA
163	A30_27	2019-11-22	1	2019-12-17	400.83
164	A30_27	2019-11-22	2	2019-12-17	386.76
165	A30_27	2019-11-22	3	2019-12-17	396.04
166	A30_27	2019-11-22	4	2019-12-17	382.02
167	A30_27	2019-11-22	5	2019-12-17	382.21
168	A30_12	2019-07-15	1	2019-12-17	375.53
169	A30_12	2019-07-15	2	2019-12-17	393.36
170	A30_12	2019-07-15	3	2019-12-17	389.18
171	A30_12	2019-07-15	4	2019-12-17	378.92
172	A30_12	2019-08-26	1	2019-12-17	393.87
173	A30_12	2019-08-26	2	2019-12-17	375.11
174	A30_12	2019-08-26	3	2019-12-17	379.55
175	A30_12	2019-08-26	4	2019-12-17	382.12
176	A30_12	2019-08-26	5	2019-12-17	355.44
177	A30_12	2019-10-14	1	2019-12-17	371.66
178	A30_12	2019-10-14	2	2019-12-17	393.95
179	A30_12	2019-10-14	3	2019-12-17	359.79
180	A30_12	2019-10-14	4	2019-12-17	390.84
181	A30_12	2019-10-14	5	2019-12-17	382.71
182	A30_12	2019-10-14	1	2019-12-17	389.04
183	A30_12	2019-10-14	2	2019-12-17	383.51
184	A30_12	2019-10-14	3	2019-12-17	383.62
185	A30_12	2019-10-14	4	2019-12-17	381.35
186	A30_12	2019-10-14	5	2019-12-17	394.97
187	D30_17	2019-08-26	1	2019-12-17	385.85
188	D30_17	2019-08-26	2	2019-12-17	365.29
189	D30_17	2019-08-26	3	2019-12-17	391.42
190	D30_17	2019-08-26	4	2019-12-17	403.07
191	D30_17	2019-08-26	5	2019-12-17	381.60
192	D30_17	2019-09-16	1	2019-12-18	398.55
193	D30_17	2019-09-16	2	2019-12-18	385.05
194	D30_17	2019-09-16	3	2019-12-18	390.25
195	D30_17	2019-09-16	4	2019-12-18	NA
196	D30_17	2019-09-16	5	2019-12-18	385.37
197	A30_24	2019-07-12	1	2019-12-18	377.07
198	A30_24	2019-07-12	2	2019-12-18	368.94
199	A30_24	2019-07-12	3	2019-12-18	374.85
200	A30_24	2019-07-12	4	2019-12-18	368.11
201	A30_24	2019-07-12	5	2019-12-18	386.28
202	A30_24	2019-08-16	1	2019-12-18	369.93
203	A30_24	2019-08-16	2	2019-12-18	386.16
204	A30_24	2019-08-16	3	2019-12-18	394.20
205	A30_24	2019-08-16	4	2019-12-18	388.91
206	A30_24	2019-08-16	5	2019-12-18	384.21
207	D30_15	2019-08-22	1	2019-12-18	385.32
208	D30_15	2019-08-22	2	2019-12-18	388.10
209	D30_15	2019-08-22	3	2019-12-18	NA
210	D30_15	2019-08-22	4	2019-12-18	390.95
211	D30_15	2019-09-25	1	2019-12-18	377.47
212	D30_15	2019-09-25	2	2019-12-18	373.94
213	D30_15	2019-09-25	3	2019-12-18	374.99
214	D30_15	2019-09-25	4	2019-12-18	370.73
215	D30_15	2019-09-25	5	2019-12-18	376.53
216	D30_15	2019-10-25	1	2019-12-18	382.30
217	D30_15	2019-10-25	2	2019-12-18	382.57
218	D30_15	2019-10-25	3	2019-12-18	370.89
219	D30_15	2019-10-25	4	2019-12-18	352.79
220	D30_15	2019-10-25	5	2019-12-18	380.35
221	A30_25	2019-07-12	1	2019-12-18	366.65
222	A30_25	2019-07-12	2	2019-12-18	379.36
223	A30_25	2019-07-12	3	2019-12-18	384.15
224	A30_25	2019-07-12	4	2019-12-18	377.78
225	A30_25	2019-07-12	5	2019-12-18	379.37
226	A30_25	2019-08-30	1	2019-12-18	392.92
227	A30_25	2019-08-30	2	2019-12-18	389.20
228	A30_25	2019-08-30	3	2019-12-18	400.86
229	A30_25	2019-08-30	4	2019-12-18	398.79
230	A30_25	2019-08-30	5	2019-12-18	380.27
232	A30_25	2019-09-25	2	2019-12-18	397.34
233	A30_25	2019-09-25	3	2019-12-18	392.20
234	A30_25	2019-09-25	4	2019-12-18	401.34
235	A30_25	2019-09-25	5	2019-12-18	387.38
236	A30_25	2019-09-25	1	2019-12-18	391.08
237	A30_11	2019-08-21	1	2019-12-19	371.32
238	A30_11	2019-08-21	2	2019-12-19	370.58
239	A30_11	2019-08-21	3	2019-12-19	387.72
240	A30_11	2019-08-21	4	2019-12-19	368.85
241	A30_11	2019-08-21	5	2019-12-19	365.55
242	A30_11	2019-09-25	1	2019-12-19	373.41
243	A30_11	2019-09-25	2	2019-12-19	377.18
244	A30_11	2019-09-25	3	2019-12-19	392.14
245	A30_11	2019-10-23	1	2019-12-19	383.97
246	A30_11	2019-10-23	2	2019-12-19	350.08
247	A30_11	2019-10-23	3	2019-12-19	371.47
248	A30_11	2019-12-11	1	2019-12-19	377.36
249	A30_11	2019-12-11	2	2019-12-19	375.38
250	A30_11	2019-12-11	3	2019-12-19	374.59
251	C10_17b	2019-08-19	1	2019-12-19	385.77
252	C10_17b	2019-08-19	2	2019-12-19	373.80
253	C10_17b	2019-08-19	3	2019-12-19	381.23
254	C10_17b	2019-08-19	4	2019-12-19	373.94
255	C10_17b	2019-08-19	5	2019-12-19	376.15
256	C10_17b	2019-09-16	1	2019-12-19	362.06
257	C10_17b	2019-09-16	2	2019-12-19	377.36
258	C10_17b	2019-09-16	3	2019-12-19	373.05
259	C10_17b	2019-09-16	4	2019-12-19	368.74
260	C10_17b	2019-10-14	1	2019-12-19	367.03
261	C10_17b	2019-10-14	2	2019-12-19	370.17
262	C10_17b	2019-10-14	3	2019-12-19	368.93
263	C10_17b	2019-10-14	4	2019-12-19	377.07
264	C10_17b	2019-11-18	1	2019-12-19	370.59
265	C10_17b	2019-11-18	2	2019-12-19	373.34
266	C10_17b	2019-11-18	3	2019-12-19	364.90
267	C10_17b	2019-11-18	4	2019-12-19	370.78
268	C10_17b	2019-11-18	5	2019-12-19	372.93
269	C10_17b	2019-12-16	1	2019-12-19	343.58
270	C10_17b	2019-12-16	2	2019-12-19	338.47
271	C10_17b	2019-12-16	3	2019-12-19	349.81
272	C10_17b	2019-12-16	4	2019-12-19	347.12
273	C10_17b	2019-12-16	5	2019-12-19	360.55
274	C10_24	2019-08-23	1	2019-12-19	385.53
275	C10_24	2019-08-23	2	2019-12-19	386.20
276	C10_24	2019-08-23	3	2019-12-19	390.06
277	C10_24	2019-08-23	4	2019-12-19	392.46
278	C10_24	2019-08-23	5	2019-12-19	397.01
279	C10_24	2019-09-25	1	2019-12-19	399.55
280	C10_24	2019-09-25	2	2019-12-19	377.44
281	C10_24	2019-09-25	3	2019-12-19	395.06
282	C10_24	2019-09-25	4	2019-12-19	372.16
283	C10_24	2019-09-25	5	2019-12-19	393.02
284	C10_24	2019-10-25	1	2019-12-19	370.40
285	C10_24	2019-10-25	2	2019-12-19	377.71
286	C10_24	2019-10-25	3	2019-12-19	372.12
287	C10_24	2019-11-22	1	2019-12-20	357.33
288	C10_24	2019-11-22	2	2019-12-20	345.03
289	C10_24	2019-11-22	3	2019-12-20	354.07
290	C10_24	2019-11-22	4	2019-12-20	336.51
291	C10_24	2019-11-22	5	2019-12-20	360.88
292	C10_9	2019-07-19	1	2020-01-14	348.00
293	C10_9	2019-07-19	2	2020-01-14	371.27
294	C10_9	2019-07-19	3	2020-01-14	346.00
295	C10_9	2019-07-19	4	2020-01-14	326.41
296	C10_9	2019-08-23	1	2020-01-14	379.35
297	C10_9	2019-08-23	2	2020-01-14	374.59
298	C10_9	2019-08-23	3	2020-01-14	371.15
299	C10_9	2019-09-25	1	2020-01-14	368.12
300	C10_9	2019-09-25	2	2020-01-14	366.50
301	C10_9	2019-09-25	3	2020-01-14	375.98
302	C10_9	2019-09-25	4	2020-01-14	369.43
303	C10_19	2019-10-11	1	2020-01-14	381.17
304	C10_19	2019-10-11	2	2020-01-14	383.33
305	C10_19	2019-10-11	3	2020-01-14	381.33
306	C10_19	2019-10-11	4	2020-01-14	375.92
307	C10_19	2019-10-11	5	2020-01-14	374.43
308	C10_19	2019-11-29	1	2020-01-14	357.44
309	C10_19	2019-11-29	2	2020-01-14	346.22
310	C10_19	2019-11-29	3	2020-01-14	344.74
311	C10_19	2019-11-29	4	2020-01-14	342.14
312	F10_8	2019-08-21	1	2020-01-14	356.62
313	F10_8	2019-08-21	2	2020-01-14	385.41
314	F10_8	2019-08-21	3	2020-01-14	381.28
315	F10_8	2019-08-21	4	2020-01-14	387.35
316	F10_8	2019-08-21	5	2020-01-14	381.37
317	F10_8	2019-10-02	1	2020-01-14	355.54
318	F10_8	2019-10-02	2	2020-01-14	355.55
319	F10_8	2019-10-02	3	2020-01-14	353.69
320	F10_8	2019-10-02	4	2020-01-14	345.01
321	F10_8	2019-10-02	5	2020-01-14	357.09
322	F10_8	2019-10-23	1	2020-01-14	378.49
323	F10_8	2019-10-23	2	2020-01-14	374.73
324	F10_8	2019-10-23	3	2020-01-14	373.90
325	F10_8	2019-10-23	4	2020-01-14	364.00
326	F10_8	2019-10-23	5	2020-01-14	376.02
327	F10_8	2019-11-27	1	2020-01-14	348.89
328	F10_8	2019-11-27	2	2020-01-14	342.35
329	F10_8	2019-11-27	3	2020-01-14	348.62
330	F10_8	2019-11-27	4	2020-01-14	360.65
331	F10_8	2019-11-27	5	2020-01-14	348.29
332	F10_8	2019-11-27	6	2020-01-14	333.71
333	C10_28	2019-07-12	1	2020-01-14	367.76
334	C10_28	2019-07-12	2	2020-01-14	382.95
335	C10_28	2019-08-23	1	2020-01-14	374.95
336	C10_28	2019-08-23	2	2020-01-14	379.39
337	C10_28	2019-08-23	3	2020-01-14	361.36
338	C10_28	2019-08-23	4	2020-01-14	363.39
339	C10_28	2019-08-23	5	2020-01-14	384.25
340	C10_28	2019-09-25	1	2020-01-14	374.58
341	C10_28	2019-09-25	2	2020-01-14	NA
342	C10_28	2019-09-25	3	2020-01-14	377.75
343	C10_28	2019-09-25	4	2020-01-14	368.79
344	C10_28	2019-09-25	5	2020-01-14	369.69
345	C10_28	2019-10-25	1	2020-01-14	342.86
346	F10_1	2019-07-17	1	2020-01-14	367.94
347	F10_1	2019-07-17	2	2020-01-14	365.06
348	F10_1	2019-07-17	3	2020-01-14	356.48
349	F10_1	2019-07-17	4	2020-01-14	365.33
350	F10_1	2019-07-17	5	2020-01-14	353.66
351	F10_1	2019-08-21	1	2020-01-14	368.74
352	F10_1	2019-08-21	2	2020-01-14	373.64
353	F10_1	2019-08-21	3	2020-01-14	370.58
354	F10_1	2019-08-21	4	2020-01-14	373.75
355	F10_1	2019-08-21	5	2020-01-14	366.00
356	C10_16	2019-07-15	1	2020-01-14	381.92
357	C10_16	2019-07-15	2	2020-01-14	365.96
358	C10_16	2019-07-15	3	2020-01-14	397.68
359	C10_16	2019-07-15	4	2020-01-14	366.13
360	C10_16	2019-07-15	5	2020-01-14	386.85
361	C10_16	2019-08-19	1	2020-01-14	394.60
362	C10_16	2019-08-19	2	2020-01-14	378.71
363	C10_16	2019-08-19	3	2020-01-14	400.25
364	C10_16	2019-08-19	4	2020-01-14	391.79
365	C10_16	2019-09-16	1	2020-01-14	399.24
366	C10_16	2019-09-16	2	2020-01-14	379.03
367	C10_16	2019-09-16	3	2020-01-14	397.01
368	C10_16	2019-09-16	4	2020-01-14	393.66
369	C10_16	2019-09-16	5	2020-01-14	410.10
370	C10_16	2019-10-14	1	2020-01-14	403.31
371	C10_16	2019-10-14	2	2020-01-14	386.32
372	C10_16	2019-10-14	3	2020-01-14	391.34
373	C10_16	2019-10-14	4	2020-01-14	373.05
374	C10_16	2019-10-14	5	2020-01-14	297.38
375	C10_16	2019-11-18	1	2020-01-14	388.02
376	C10_16	2019-11-18	2	2020-01-14	356.71
377	C10_16	2019-11-18	3	2020-01-14	363.52
378	C10_16	2019-11-18	4	2020-01-14	388.19
379	C10_16	2019-11-18	5	2020-01-14	396.58
380	C10_27	2019-07-12	1	2020-01-14	375.58
381	C10_27	2019-07-12	2	2020-01-14	366.66
382	C10_27	2019-07-12	3	2020-01-14	375.88
383	C10_27	2019-07-12	4	2020-01-14	375.27
384	C10_27	2019-08-23	1	2020-01-14	380.57
385	C10_27	2019-08-23	2	2020-01-14	377.59
386	C10_27	2019-08-23	3	2020-01-14	376.90
387	C10_27	2019-08-23	4	2020-01-14	385.34
388	C10_27	2019-08-23	5	2020-01-14	368.07
389	C10_30	2019-07-12	1	2020-01-14	340.70
390	C10_30	2019-07-12	2	2020-01-14	359.61
391	C10_30	2019-07-12	3	2020-01-14	342.21
392	C10_30	2019-07-12	4	2020-01-14	354.79
393	C10_30	2019-07-12	5	2020-01-14	364.34
394	C10_30	2019-07-12	6	2020-01-14	367.95
395	C10_30	2019-07-12	7	2020-01-14	356.26
396	C10_30	2019-08-30	1	2020-01-15	401.30
397	C10_30	2019-08-30	2	2020-01-15	379.33
398	C10_30	2019-08-30	3	2020-01-15	379.92
399	C10_30	2019-08-30	4	2020-01-15	363.47
400	C10_30	2019-08-30	5	2020-01-15	390.03
401	C10_30	2019-09-25	1	2020-01-15	365.93
402	C10_30	2019-09-25	2	2020-01-15	382.83
403	C10_30	2019-09-25	3	2020-01-15	374.39	375.8	381.25	389.11	388.49	386.25	383.06	385.26	386.12	386.35
404	C10_30	2019-09-25	4	2020-01-15	392.92
405	C10_30	2019-09-25	5	2020-01-15	377.54
406	C10_30	2019-10-18	1	2020-01-15	378.47
407	C10_30	2019-10-18	2	2020-01-15	369.81
408	C10_30	2019-10-18	3	2020-01-15	369.17
409	C10_30	2019-10-18	4	2020-01-15	366.01
410	C10_30	2019-10-18	5	2020-01-15	381.49
