# Supplementary material for: Late-life fitness gains and reproductive death in Cardiocondyla obscurior ants
Source: eLife. 2022 Apr 6;11:e74695. doi: 10.7554/eLife.74695 (PMC8986319; doi:10.7554/eLife.74695)
Supplement: Source data 4. [file elife-74695-data4.xlsx]

## Sheet: Sheet1
Source Data 4 - Field colonies size from Brazil collected in 2013 (BR13), in 2018 (BR18) and Japan in 2011 (JP11) by Lukas Schrader et al.
queens	worker	origin
1	9	BR13
1	22	BR13
1	22	BR13
2	20	BR13
2	10	BR13
2	15	BR13
3	7	BR13
3	24	BR13
3	34	BR13
4	23	BR13
4	51	BR13
4	36	BR13
5	23	BR13
5	65	BR13
5	61	BR13
6	27	BR13
7	39	BR13
7	43	BR13
8	28	BR13
8	32	BR13
8	19	BR13
8	21	BR13
8	64	BR13
9	52	BR13
9	82	BR13
11	83	BR13
12	79	BR13
0	3	BR18
0	6	BR18
0	40	BR18
0	18	BR18
0	2	BR18
0	15	BR18
1	24	BR18
1	19	BR18
1	8	BR18
1	24	BR18
1	9	BR18
1	20	BR18
1	34	BR18
1	75	BR18
1	20	BR18
1	7	BR18
1	50	BR18
1	10	BR18
1	4	BR18
1	31	BR18
1	136	BR18
1	45	BR18
1	14	BR18
1	25	BR18
2	43	BR18
2	40	BR18
2	17	BR18
2	50	BR18
2	9	BR18
2	14	BR18
2	108	BR18
2	80	BR18
2	85	BR18
3	21	BR18
3	109	BR18
3	129	BR18
3	50	BR18
3	51	BR18
3	101	BR18
4	67	BR18
4	15	BR18
4	73	BR18
4	93	BR18
4	93	BR18
5	1	BR18
6	49	BR18
6	74	BR18
7	51	BR18
8	160	BR18
8	113	BR18
8	125	BR18
8	22	BR18
9	193	BR18
10	145	BR18
11	179	BR18
12	244	BR18
12	112	BR18
30	208	BR18
1	30	JP11
1	47	JP11
1	14	JP11
1	3	JP11
2	4	JP11
2	6	JP11
2	46	JP11
2	1	JP11
3	22	JP11
3	15	JP11
3	16	JP11
3	3	JP11
3	8	JP11
4	25	JP11
4	14	JP11
4	20	JP11
4	7	JP11
4	16	JP11
5	18	JP11
5	10	JP11
5	22	JP11
5	8	JP11
6	12	JP11
6	24	JP11
7	48	JP11
7	24	JP11
8	21	JP11
8	32	JP11
8	7	JP11
9	28	JP11
9	19	JP11
10	57	JP11
11	44	JP11
11	38	JP11
11	27	JP11
14	78	JP11
15	29	JP11
17	35	JP11
17	47	JP11
17	18	JP11
17	18	JP11
17	79	JP11
17	40	JP11
18	49	JP11
19	25	JP11
19	43	JP11
19	29	JP11
19	30	JP11
20	37	JP11
21	47	JP11
21	37	JP11
23	93	JP11
27	48	JP11
28	50	JP11
30	48	JP11
30	46	JP11
32	140	JP11
34	15	JP11
36	86	JP11
45	37	JP11
54	145	JP11
60	140	JP11
