# Supplementary material for: Late-life fitness gains and reproductive death in Cardiocondyla obscurior ants
Source: eLife. 2022 Apr 6;11:e74695. doi: 10.7554/eLife.74695 (PMC8986319; doi:10.7554/eLife.74695)
Supplement: Source data 5. [file elife-74695-data5.xlsx]

## Sheet: Sheet1
Source Data 5 - Samples for RNA sequencing and experimental design information.
Complete_name_sequencing	Number_sequencing_sample	Number_Workers	Caste	Tissue	Age_range	queen.id	number for RNA extraction	Age_weeks	RNA_Bioanalyzer_concentration_(pg/ul)	Duplications	RNA_Bioanalyzer_quality	Lane	Eggs_week	Perc_mapped	GC	Eggs_death	QueenP_week
A006850126_145753_S1_L003_R1_001_fastqc.html	1	30	Queen	Head-Thorax	Old	A_17	65	49	810	57.9	good	L3	14.18	89.55	40	14	7.06
A006850126_145756_S2_L003_R1_001_fastqc.html	2	30	Queen	Gaster	Old	A_17	66	49	5207	74	good	L3	14.18	49.47	38	14	7.06
A006850126_145758_S3_L003_R1_001_fastqc.html	3	20	Queen	Head-Thorax	Old	B_39	67	24	2890	63.7	good	L3	12.33	79.61	40	16	0.79
A006850126_145760_S4_L003_R1_001_fastqc.html	4	20	Queen	Gaster	Old	B_39	68	24	8657	90.3	okay	L3	12.33	11.15	35	16	0.79
A006850126_145762_S5_L003_R1_001_fastqc.html	5	30	Queen	Head-Thorax	Old	A_13	69	37	566	57.6	okay	L3	14.11	85.66	40	9	3.35
A006850126_145764_S6_L003_R1_001_fastqc.html	6	30	Queen	Gaster	Old	A_13	70	37	3853	86.2	good	L3	14.11	19.87	36	9	3.35
A006850126_145766_S7_L003_R1_001_fastqc.html	7	20	Queen	Head-Thorax	Old	B_32	71	33	1425	60.5	good	L3	11.85	87.68	40.5	12	1.45
A006850126_145768_S8_L003_R1_001_fastqc.html	8	20	Queen	Gaster	Old	B_32	72	33	6955	87.4	good	L3	11.85	15.39	34	12	1.45
A006850126_145812_S30_L003_R1_001_fastqc.html	30	20	Queen	Gaster	Old	E_9	52	39	4736	92.6	good	L3	8.18	6.75	35	1	0.79
A006850126_145814_S31_L003_R1_001_fastqc.html	31	30	Queen	Head-Thorax	Old	D_15	53	32	1491	61.1	good	L3	14.06	77.209999999999994	40	3	5.42
A006850126_145816_S32_L003_R1_001_fastqc.html	32	30	Queen	Gaster	Old	D_15	54	32	31344	93.4	bad	L3	14.06	5.49	33	3	5.42
A006850126_145568_S33_L004_R1_001_fastqc.html	33	20	Queen	Head-Thorax	Middle	B_29	1	21	1077	53.76	good	L4	7.05	89.34	41	4	0.81
A006850126_145571_S34_L004_R1_001_fastqc.html	34	20	Queen	Gaster	Middle	B_29	2	21	3499	74.44	good	L4	7.05	39.020000000000003	37	4	0.81
A006850126_145573_S35_L004_R1_001_fastqc.html	35	30	Queen	Head-Thorax	Middle	A_26	3	21	1313	58.38	good	L4	4.05	72.8	41	9	0.71
A006850126_145575_S36_L004_R1_001_fastqc.html	36	30	Queen	Gaster	Middle	A_26	4	21	5508	89.57	good	L4	4.05	9.6	34	9	0.71
A006850126_145577_S37_L004_R1_001_fastqc.html	37	10	Queen	Head-Thorax	Middle	F_17	5	21	2543	63.2	good	L4	22.81	84.33	41	18	1.05
A006850126_145579_S38_L004_R1_001_fastqc.html	38	10	Queen	Gaster	Middle	F_17	6	21	12329	67.3	good	L4	22.81	61.21	40	18	1.05
A006850126_145581_S39_L004_R1_001_fastqc.html	39	10	Queen	Head-Thorax	Middle	F_16	7	19	503	55.2	good	L4	5.1100000000000003	89.37	41	6	0
A006850126_145583_S40_L004_R1_001_fastqc.html	40	10	Queen	Gaster	Middle	F_16	8	19	1854	75.2	good	L4	5.1100000000000003	36.96	40	6	0
A006850126_145585_S41_L004_R1_001_fastqc.html	41	30	Queen	Head-Thorax	Middle	D_10	9	21	1029	61.5	good	L4	14.43	89.54	41	22	1.29
A006850126_145587_S42_L004_R1_001_fastqc.html	42	30	Queen	Gaster	Middle	D_10	10	21	7151	78.8	good	L4	14.43	34.78	37	22	1.29
A006850126_145589_S43_L004_R1_001_fastqc.html	43	20	Queen	Head-Thorax	Middle	B_33	11	21	277	67.1	good	L4	7.19	62.29	39	6	0.71
A006850126_145591_S44_L004_R1_001_fastqc.html	44	20	Queen	Gaster	Middle	B_33	12	21	4075	91.4	good	L4	7.19	7.82	35	6	0.71
A006850126_145593_S45_L004_R1_001_fastqc.html	45	20	Queen	Head-Thorax	Middle	B_35	13	21	2086	63.1	good	L4	7.86	77.900000000000006	41	18	0.28999999999999998
A006850126_145595_S46_L004_R1_001_fastqc.html	46	20	Queen	Gaster	Middle	B_35	14	21	11594	88	good	L4	7.86	14.72	34	18	0.28999999999999998
A006850126_145597_S47_L004_R1_001_fastqc.html	47	10	Queen	Head-Thorax	Middle	C_14	15	21	429	66	good	L4	18.71	69.64	39	24	1.19
A006850126_145599_S48_L004_R1_001_fastqc.html	48	10	Queen	Gaster	Middle	C_14	16	21	9827	69.2	good	L4	18.71	62.83	40	24	1.19
A006850126_145601_S49_L004_R1_001_fastqc.html	49	20	Queen	Head-Thorax	Middle	B_13	17	22	2155	68.4	good	L4	23.41	73.989999999999995	41	43	1.45
A006850126_145603_S50_L004_R1_001_fastqc.html	50	20	Queen	Gaster	Middle	B_13	18	22	10836	69.1	good	L4	23.41	56.4	40	43	1.45
A006850126_145605_S51_L004_R1_001_fastqc.html	51	10	Queen	Head-Thorax	Middle	C_29	19	21	1239	58.1	good	L4	8.0500000000000007	89.5	41	17	0.48
A006850126_145607_S52_L004_R1_001_fastqc.html	52	10	Queen	Gaster	Middle	C_29	20	21	7001	80.1	good	L4	8.0500000000000007	31.74	36	17	0.48
A006850126_145609_S53_L004_R1_001_fastqc.html	53	30	Queen	Head-Thorax	Middle	A_20	21	21	1147	58.4	good	L4	9.9	89.71	41	18	1.71
A006850126_145611_S54_L004_R1_001_fastqc.html	54	30	Queen	Gaster	Middle	A_20	22	21	8068	86.3	good	L4	9.9	17.100000000000001	35	18	1.71
A006850126_145613_S55_L004_R1_001_fastqc.html	55	30	Queen	Head-Thorax	Middle	A_8	23	22	1831	60	good	L4	25.59	82.65	40	50	1.86
A006850126_145615_S56_L004_R1_001_fastqc.html	56	30	Queen	Gaster	Middle	A_8	24	22	14144	63.5	good	L4	25.59	63.54	39	50	1.86
A006850126_145617_S57_L004_R1_001_fastqc.html	57	20	Queen	Head-Thorax	Middle	E_23	25	20	1010	56.2	good	L4	8.4499999999999993	84.37	41	21	0.45
A006850126_145619_S58_L004_R1_001_fastqc.html	58	20	Queen	Gaster	Middle	E_23	26	20	5171	79	good	L4	8.4499999999999993	32.92	36	21	0.45
A006850126_145621_S59_L004_R1_001_fastqc.html	59	20	Queen	Head-Thorax	Middle	B_4	27	21	1274	53.4	good	L4	10.43	86.24	41	8	1.62
A006850126_145623_S60_L004_R1_001_fastqc.html	60	20	Queen	Gaster	Middle	B_4	28	21	8141	89.9	good	L4	10.43	9.3800000000000008	35	8	1.62
A006850126_145625_S61_L004_R1_001_fastqc.html	61	30	Queen	Head-Thorax	Middle	D_20	29	21	753	55.5	good	L4	8.0500000000000007	84.93	41	9	0.24
A006850126_145627_S62_L004_R1_001_fastqc.html	62	30	Queen	Gaster	Middle	D_20	30	21	5349	79.7	good	L4	8.0500000000000007	28.16	36	9	0.24
A006850126_145629_S63_L004_R1_001_fastqc.html	63	10	Queen	Head-Thorax	Middle	C_27	31	21	2424	63	good	L4	12.76	71.650000000000006	41	23	0.48
A006850126_145631_S64_L004_R1_001_fastqc.html	64	10	Queen	Gaster	Middle	C_27	32	21	8346	75.1	good	L4	12.76	40.82	37.5	23	0.48
A006850126_145662_S65_L004_R1_001_fastqc.html	65	30	Queen	Head-Thorax	Middle	D_13	33	21	3538	65.1	good	L4	11.1	69.989999999999995	41	11	1.52
A006850126_145664_S66_L004_R1_001_fastqc.html	66	30	Queen	Gaster	Middle	D_13	34	21	10431	89.1	good	L4	11.1	11.68	35	11	1.52
A006850126_145666_S67_L004_R1_001_fastqc.html	67	10	Queen	Head-Thorax	Middle	F_1	35	21	2402	65.3	good	L4	17.760000000000002	68.19	41	18	0.56999999999999995
A006850126_145668_S68_L004_R1_001_fastqc.html	68	10	Queen	Gaster	Middle	F_1	36	21	7108	73.7	good	L4	17.760000000000002	49.22	40	18	0.56999999999999995
A006850126_145670_S69_L004_R1_001_fastqc.html	69	30	Queen	Head-Thorax	Old	A_10	37	36	1581	63.6	good	L4	11.56	66.790000000000006	39	2	4.17
A006850126_145672_S70_L004_R1_001_fastqc.html	70	30	Queen	Gaster	Old	A_10	38	36	28958	94.9	bad	L4	11.56	2.04	32	2	4.17
A006850126_145674_S71_L004_R1_001_fastqc.html	71	10	Queen	Head-Thorax	Old	F_6	39	43	880	59.4	good	L4	18.88	88.35	40	4	3.28
A006850126_145676_S72_L004_R1_001_fastqc.html	72	10	Queen	Gaster	Old	F_6	40	43	3936	79.1	good	L4	18.88	32.06	36	4	3.28
A006850126_145678_S73_L004_R1_001_fastqc.html	73	10	Queen	Head-Thorax	Old	C_30	41	40	643	63.7	good	L4	18	87.74	42	2	5.0999999999999996
A006850126_145680_S74_L004_R1_001_fastqc.html	74	10	Queen	Gaster	Old	C_30	42	40	13809	95.5	good	L4	18	1.42	33	2	5.0999999999999996
A006850126_145682_S75_L004_R1_001_fastqc.html	75	30	Queen	Head-Thorax	Old	D_12	43	44	640	76.5	good	L4	7.57	69.819999999999993	45	4	0.86
A006850126_145684_S76_L004_R1_001_fastqc.html	76	30	Queen	Gaster	Old	D_12	44	44	25694	95.2	bad	L4	7.57	1.86	32	4	0.86
A006850126_145686_S77_L004_R1_001_fastqc.html	77	20	Queen	Head-Thorax	Old	B_8	45	33	1053	66.1	good	L4	8.5500000000000007	76.94	42	3	0.73
A006850126_145688_S78_L004_R1_001_fastqc.html	78	20	Queen	Gaster	Old	B_8	46	33	23755	94.2	bad	L4	8.5500000000000007	3.22	31	3	0.73
A006850126_145690_S79_L004_R1_001_fastqc.html	79	10	Queen	Head-Thorax	Old	C_13	47	41	1210	68.7	good	L4	16.98	86.85	42	14	4.12
A006850126_145692_S80_L004_R1_001_fastqc.html	80	10	Queen	Gaster	Old	C_13	48	41	25760	91.2	bad	L4	16.98	8.4600000000000009	34	14	4.12
A006850126_145694_S81_L004_R1_001_fastqc.html	81	20	Queen	Head-Thorax	Old	B_19	49	45	1171	63.9	good	L4	16.690000000000001	86.2	42	6	5.4
A006850126_145696_S82_L004_R1_001_fastqc.html	82	20	Queen	Gaster	Old	B_19	50	45	3639	79.8	good	L4	16.690000000000001	38.770000000000003	38	6	5.4
A006850126_145698_S83_L004_R1_001_fastqc.html	83	20	Queen	Head-Thorax	Old	E_9	51	39	869	62.2	good	L4	8.18	87.2	42	1	0.79
A006850126_145700_S84_L004_R1_001_fastqc.html	84	10	Queen	Head-Thorax	Old	C_24	55	28	1541	69.5	good	L4	11.57	68.05	42	2	0.93
A006850126_145702_S85_L004_R1_001_fastqc.html	85	10	Queen	Gaster	Old	C_24	56	28	12386	92.7	bad	L4	11.57	5.64	34	2	0.93
A006850126_145704_S86_L004_R1_001_fastqc.html	86	10	Queen	Head-Thorax	Old	C_9	57	36	685	64.6	okay	L4	9.86	88.63	42	6	0.61
A006850126_145706_S87_L004_R1_001_fastqc.html	87	10	Queen	Gaster	Old	C_9	58	36	12412	93	bad	L4	9.86	5.23	34	6	0.61
A006850126_145708_S88_L004_R1_001_fastqc.html	88	20	Queen	Head-Thorax	Old	E_13b	59	32	888	66.4	good	L4	11.66	88.32	43	3	2.97
A006850126_145710_S89_L004_R1_001_fastqc.html	89	30	Queen	Head-Thorax	Old	A_12	63	33	1554	66.3	good	L4	6.58	80.62	42	7	1.42
A006850126_145712_S90_L004_R1_001_fastqc.html	90	30	Queen	Gaster	Old	A_12	64	33	18670	93.4	bad	L4	6.58	4.87	33	7	1.42
A006850126_145818_S91_L004_R1_001_fastqc.html	91	20	Queen	Gaster	Old	E_13b	60	32	2504	82.2	good	L4	11.66	28.45	38	3	2.97
A006850126_145821_S92_L004_R1_001_fastqc.html	92	10	Queen	Head-Thorax	Old	C_16	61	34	766	85.8	good	L4	11.12	20.87	38	8	2
A006850126_145823_S93_L004_R1_001_fastqc.html	93	10	Queen	Gaster	Old	C_16	62	34	9643	92.7	good	L4	11.12	6.46	34	8	2
