# Supplementary material for: Late-life fitness gains and reproductive death in Cardiocondyla obscurior ants
Source: eLife. 2022 Apr 6;11:e74695. doi: 10.7554/eLife.74695 (PMC8986319; doi:10.7554/eLife.74695)
Supplement: Source data 6. — W indicates the treatment (number of workers) and matches the code (A and D for 30, B and E for 20, and C and F for 10 workers). Status indicates 0 = queen alive, 1 = queen's sacrifice. [file elife-74695-data6.xlsx]

## Sheet: Sheet1
Source Data 6 - Population survey of 36 queens. W indicates the treatment (number of workers) and matches the Code (A and D for 30, B and E for 20 and C and F for 10 workers). Status indicates 0 = queen alive, 1 = queen's sacrifice
queen.id	Order	Box	Stock_box	Origin_nest	Box_nest	Code	W	Replicate	Setup_date	Week	Date	Shed	Workers	Eggs	Pupae_total	Pupae_W	Pupae_Q	Pupae_M	Pup_MW	Added_W	Added_Male	Queen_alive	Status	F1_alive2	F1_alive	Counted_by	AgeGroup
A_10	6081	60	48	16	48_16	A	30	10	43538	1	43544	0	26	0	2	2	0	0	0	6	1	1	0	0	0	Jan	Old
A_10	6082	60	48	16	48_16	A	30	10	43538	2	43551	0	29	0	3	3	0	0	0	1		1	0	0	0	Jan	Old
A_10	6084	60	48	16	48_16	A	30	10	43538	4	43565	1	28	9	2	2	0	0	0	2		1	0	0	0	Luisa	Old
A_10	6085	60	48	16	48_16	A	30	10	43538	5	43572	1	29	4	1	1	0	0	0	0		1	0	0	0	Luisa	Old
A_10	6086	60	48	16	48_16	A	30	10	43538	6	43579	1	30	10	0	0	0	0	0	0		1	0	0	0	Luisa	Old
A_10	6088	60	48	16	48_16	A	30	10	43538	8	43593	1	31	14	11	11	0	0	0	0		1	0	0	0	Luisa	Old
A_10	6089	60	48	16	48_16	A	30	10	43538	9	43600	1	36	7	11	11	0	0	0	0		1	0	0	0	Luisa	Old
A_10	6090	60	48	16	48_16	A	30	10	43538	10	43607	1	37	13	14	12	1	1	0	0		1	0	0	0	Luisa	Old
A_10	6087	60	48	16	48_16	A	30	10	43538	7	43586	1	30	12	7	7	0	0	0	0		1	0	0	0	Luisa	Old
A_10	6092	60	48	16	48_16	A	30	10	43538	12	43621	1	40	6	17	14	2	1	0	0		1	0	0	0	Julia	Old
A_10	6093	60	48	16	48_16	A	30	10	43538	13	43628	1	33	7	11	6	4	1	0	0		1	0	0	0	Luisa	Old
A_10	6094	60	48	16	48_16	A	30	10	43538	14	43635	1	31	8	9	7	2	0	0	0		1	0	0	0	Luisa	Old
A_10	6095	60	48	16	48_16	A	30	10	43538	15	43642	1	35	4	15	14	1	0	0	0		1	0	0	0	Luisa	Old
A_10	6083	60	48	16	48_16	A	30	10	43538	3	43558	1	29	6	2	2	0	0	0	0		1	0	0	0	Luisa	Old
A_10	6097	60	48	16	48_16	A	30	10	43538	17	43656	1	38	14	15	13	1	1	0	0		1	0	0	0	Luisa	Old
A_10	6098	60	48	16	48_16	A	30	10	43538	18	43663	1	34	15	11	9	2	0	0	0		1	0	0	0	Luisa	Old
A_10	6099	60	48	16	48_16	A	30	10	43538	19	43670	1	34	21	9	7	2	0	0	0		1	0	0	0	Luisa	Old
A_10	6100	60	48	16	48_16	A	30	10	43538	20	43677	1	33	17	17	16	0	1	0	0		1	0	0	0	Luisa	Old
A_10	6101	60	48	16	48_16	A	30	10	43538	21	43684	1	37	23	19	19	0	0	0	0		1	0	0	0	Luisa	Old
A_10	6102	60	48	16	48_16	A	30	10	43538	22	43691	1	44	15	26	26	0	0	0	0		1	0	0	0	Luisa	Old
A_10	6103	60	48	16	48_16	A	30	10	43538	23	43698	1	38	21	32	31	0	1	0	0		1	0	0	0	Luisa	Old
A_10	6104	60	48	16	48_16	A	30	10	43538	24	43705	1	48	21	29	29	0	0	0	0		1	0	0	0	Luisa	Old
A_10	6105	60	48	16	48_16	A	30	10	43538	25	43712	1	45	31	39	36	3	0	0	0		1	0	0	0	Luisa	Old
A_10	6106	60	48	16	48_16	A	30	10	43538	26	43719	1	44	20	43	31	10	2	0	0		1	0	0	0	Mathi	Old
A_10	6107	60	48	16	48_16	A	30	10	43538	27	43726	1	48	7	30	20	9	1	0	0		1	0	0	0	Luisa	Old
A_10	6108	60	48	16	48_16	A	30	10	43538	28	43733	1	42	19	26	3	22	1	0	0		1	0	0	0	Luisa	Old
A_10	6109	60	48	16	48_16	A	30	10	43538	29	43740	1	36	17	20	1	17	2	0	0		1	0	0	0	Luisa	Old
A_10	6110	60	48	16	48_16	A	30	10	43538	30	43747	1	30	13	18	0	17	1	0	0		1	0	0	0	Luisa	Old
A_10	6111	60	48	16	48_16	A	30	10	43538	31	43754	1	26	12	8	0	8	0	0	4		1	0	0	0	Luisa	Old
A_10	6112	60	48	16	48_16	A	30	10	43538	32	43761	1	29	6	21	1	16	4	0	0		1	0	0	0	Luisa	Old
A_10	6113	60	48	16	48_16	A	30	10	43538	33	43768	1	29	6	12	0	10	2	0	0		1	0	0	0	Luisa	Old
A_10	6114	60	48	16	48_16	A	30	10	43538	34	43775	1	25	8	9	0	7	2	0	5		1	0	0	0	Jan	Old
A_10	6115	60	48	16	48_16	A	30	10	43538	35	43782	1	29	4	7	0	7	0	0	0		1	0	0	0	Luisa	Old
A_10	6116	60	48	16	48_16	A	30	10	43538	36	43789	1	24	2	7	0	7	0	0	0		1	0	0	0	Luisa	Old
A_10	6117	60	48	16	48_16	A	30	10	43538	37	43796	1	23	1	8	0	6	2	0	0				0	0	Luisa	Old
A_10	6118	60	48	16	48_16	A	30	10	43538	38	43803	1	23	0	1	0	1	0	0	0				0	0	Luisa	Old
A_10	6119	60	48	16	48_16	A	30	10	43538	39	43810	1	23	0	0	0	0	0	0	0				0	0	Luisa	Old
A_10	6120	60	48	16	48_16	A	30	10	43538	40	43817	1	23	0	3	0	3	0	0	0				0	0	Luisa	Old
A_10	6091	60	48	16	48_16	A	30	10	43538	11	43614	1	35	15	16	15	1	0	0	0		1	0	0	0	Luisa	Old
A_10	6096	60	48	16	48_16	A	30	10	43538	16	43649	1	35	9	15	14	1	0	0	0		1	0	0	0	Luisa	Old
A_12	402	56	48	8	48_8	A	30	12	43584	2	43598		27	4	1	0	0	1	0	3		1	0	0	0	Luisa	Old
A_12	404	56	48	8	48_8	A	30	12	43584	4	43612		30	5	1	0	0	1	0	0		1	0	0	0	Jan	Old
A_12	401	56	48	8	48_8	A	30	12	43584	1	43591	0	28	0	3	0	0	3	0	0		1	0	0	0	Luisa	Old
A_12	406	56	48	8	48_8	A	30	12	43584	6	43626		25	10	7	7	0	0	0	5		1	0	0	0	Luisa	Old
A_12	407	56	48	8	48_8	A	30	12	43584	7	43633		32	11	8	8	0	0	0	0		1	0	0	0	Luisa	Old
A_12	408	56	48	8	48_8	A	30	12	43584	8	43640		37	8	8	8	0	0	0	0		1	0	0	0	Luisa	Old
A_12	405	56	48	8	48_8	A	30	12	43584	5	43619		24	7	2	2	0	0	0	0		1	0	0	0	Luisa	Old
A_12	410	56	48	8	48_8	A	30	12	43584	10	43654		35	4	16	14	2	0	0	0		1	0	0	0	Luisa	Old
A_12	411	56	48	8	48_8	A	30	12	43584	11	43661	1	36	6	17	14	3	0	0	0		1	0	0	0	Luisa	Old
A_12	412	56	48	8	48_8	A	30	12	43584	12	43668	1	36	6	18	14	3	1	0	0		1	0	0	0	Luisa	Old
A_12	413	56	48	8	48_8	A	30	12	43584	13	43675	1	35	3	5	2	2	1	0	0		1	0	0	0	Luisa	Old
A_12	414	56	48	8	48_8	A	30	12	43584	14	43682	1	34	5	5	3	0	2	0	0		1	0	0	0	Luisa	Old
A_12	415	56	48	8	48_8	A	30	12	43584	15	43689	1	31	6	6	5	1	0	0	0		1	0	0	0	Luisa	Old
A_12	403	56	48	8	48_8	A	30	12	43584	3	43605		27	0	3	3	0	0	0	3		1	0	0	0	Luisa	Old
A_12	417	56	48	8	48_8	A	30	12	43584	17	43703	1	36	8	6	6	0	0	0	0		1	0	0	0	Luisa	Old
A_12	418	56	48	8	48_8	A	30	12	43584	18	43710	1	29	9	7	5	2	0	0	0		1	0	0	0	Luisa	Old
A_12	419	56	48	8	48_8	A	30	12	43584	19	43717	1	30	11	7	7	0	0	0	0		1	0	0	0	Luisa	Old
A_12	420	56	48	8	48_8	A	30	12	43584	20	43724	1	34	11	10	10	0	0	0	0		1	0	0	0	Luisa	Old
A_12	421	56	48	8	48_8	A	30	12	43584	21	43731	1	33	13	15	15	0	0	0	0		1	0	0	0	Luisa	Old
A_12	409	56	48	8	48_8	A	30	12	43584	9	43647		32	3	12	11	1	0	0	0		1	0	0	0	Luisa	Old
A_12	423	56	48	8	48_8	A	30	12	43584	23	43745	1	36	12	21	17	2	2	0	0		1	0	0	0	Luisa	Old
A_12	424	56	48	8	48_8	A	30	12	43584	24	43752	1	38	9	18	14	3	1	0	0		1	0	0	0	Luisa	Old
A_12	425	56	48	8	48_8	A	30	12	43584	25	43759	1	33	5	4	2	1	1	0	0		1	0	0	0	Luisa	Old
A_12	426	56	48	8	48_8	A	30	12	43584	26	43766	1	38	4	16	7	9	0	0	0		1	0	0	0	Luisa	Old
A_12	427	56	48	8	48_8	A	30	12	43584	27	43773	1	33	1	7	3	3	1	0	0		1	0	0	0	Jan	Old
A_12	428	56	48	8	48_8	A	30	12	43584	28	43780	1	33	4	8	2	6	0	0	0		1	0	0	0	Luisa	Old
A_12	416	56	48	8	48_8	A	30	12	43584	16	43696	1	30	7	5	5	0	0	0	0		1	0	0	0	Luisa	Old
A_12	430	56	48	8	48_8	A	30	12	43584	30	43794	1	28	10	3	0	2	1	0	0		1	0	0	0	Luisa	Old
A_12	431	56	48	8	48_8	A	30	12	43584	31	43801	1	25	8	0	0	0	0	0	5		1	0	0	0	Luisa	Old
A_12	432	56	48	8	48_8	A	30	12	43584	32	43808	1	30	7	1	0	1	0	0	0		1	0	0	0	Luisa	Old
A_12	433	56	48	8	48_8	A	30	12	43584	33	43815	1	32	7	5	1	2	2	0	0		1	0	0	0	Luisa	Old
A_12	434	56	48	8	48_8	A	30	12	43584	34	43822	1	29	4	3	1	2	0	0	0				0	0	Luisa	Old
A_12	422	56	48	8	48_8	A	30	12	43584	22	43738	1	42	9	16	16	0	0	0	0		1	0	0	0	Luisa	Old
A_12	436	56	48	8	48_8	A	30	12	43584	36	43836	1	28	0	1	0	1	0	0	0				0	0	Luisa	Old
A_12	437	56	48	8	48_8	A	30	12	43584	37	43843	1	29	0	1	0	1	0	0	0				0	0	Luisa	Old
A_12	438	56	48	8	48_8	A	30	12	43584	38	43850	1	26	0	4	0	4	0	0	0				0	0	Luisa	Old
A_12	429	56	48	8	48_8	A	30	12	43584	29	43787	1	29	4	5	0	4	1	0	0		1	0	0	0	Luisa	Old
A_12	435	56	48	8	48_8	A	30	12	43584	35	43829	1								0				0	0	Luisa	Old
A_13	8722	63	34	1	34_1	A	30	13	43567	2	43581	1	28	4	4	4	0	0	0	2		1	0	0	0	Luisa	Old
A_13	8723	63	34	1	34_1	A	30	13	43567	3	43588	1	33	8	3	3	0	0	0	0		1	0	0	0	Luisa	Old
A_13	8725	63	34	1	34_1	A	30	13	43567	5	43602	1	30	5	3	3	0	0	0	0		1	0	0	0	Luisa	Old
A_13	8726	63	34	1	34_1	A	30	13	43567	6	43609	1	29	9	7	7	0	0	0	0		1	0	0	0	Luisa	Old
A_13	8727	63	34	1	34_1	A	30	13	43567	7	43616	1	31	12	10	10	0	0	0	0		1	0	0	0	Luisa	Old
A_13	8724	63	34	1	34_1	A	30	13	43567	4	43595	1	28	7	2	2	0	0	0	0		1	0	0	0	Luisa	Old
A_13	8729	63	34	1	34_1	A	30	13	43567	9	43630	1	32	23	20	16	4	0	0	0		1	0	0	0	Luisa	Old
A_13	8730	63	34	1	34_1	A	30	13	43567	10	43637	1	36	23	20	20	0	0	0	0		1	0	0	0	Luisa	Old
A_13	8731	63	34	1	34_1	A	30	13	43567	11	43644	1	33	26	20	20	0	0	0	0		1	0	0	0	Luisa	Old
A_13	8732	63	34	1	34_1	A	30	13	43567	12	43651	1	47	35	19	16	3	0	0	0		1	0	0	0	Luisa	Old
A_13	8733	63	34	1	34_1	A	30	13	43567	13	43658	1	37	17	21	21	0	0	0	0		1	0	0	0	Luisa	Old
A_13	8721	63	34	1	34_1	A	30	13	43567	1	43574	0	30	0	4	4	0	0	0	0		1	0	0	0	Luisa	Old
A_13	8735	63	34	1	34_1	A	30	13	43567	15	43672	1	50	28	25	25	0	0	0	0		1	0	0	0	Luisa	Old
A_13	8736	63	34	1	34_1	A	30	13	43567	16	43679	1	38	30	20	14	6	0	0	0		1	0	0	0	Luisa	Old
A_13	8737	63	34	1	34_1	A	30	13	43567	17	43686	1	42	21	25	22	2	1	0	0		1	0	0	0	Luisa	Old
A_13	8738	63	34	1	34_1	A	30	13	43567	18	43693	1	35	7	28	26	2	0	0	0		1	0	0	0	Luisa	Old
A_13	8739	63	34	1	34_1	A	30	13	43567	19	43700	1	50	17	34	30	2	2	0	0		1	0	0	0	Luisa	Old
A_13	8740	63	34	1	34_1	A	30	13	43567	20	43707	1	37	5	39	32	7	0	0	0		1	0	0	0	Luisa	Old
A_13	8728	63	34	1	34_1	A	30	13	43567	8	43623	1	37	15	9	9	0	0	0	0		1	0	0	0	Julia	Old
A_13	8742	63	34	1	34_1	A	30	13	43567	22	43721	1	44	10	4	3	1	0	0	0		1	0	0	0	Luisa	Old
A_13	8743	63	34	1	34_1	A	30	13	43567	23	43728	1	37	9	11	8	3	0	0	0		1	0	0	0	Jan	Old
A_13	8744	63	34	1	34_1	A	30	13	43567	24	43735	1	25	17	14	14	0	0	0	5		1	0	0	0	Luisa	Old
A_13	8745	63	34	1	34_1	A	30	13	43567	25	43742	1	44	10	11	10	0	1	0	0		1	0	0	0	Luisa	Old
A_13	8746	63	34	1	34_1	A	30	13	43567	26	43749	1	31	12	12	11	1	0	0	0		1	0	0	0	Luisa	Old
A_13	8734	63	34	1	34_1	A	30	13	43567	14	43665	1	30	32	29	29	0	0	0	0		1	0	0	0	Luisa	Old
A_13	8748	63	34	1	34_1	A	30	13	43567	28	43763	1	36	12	20	13	6	1	0	0		1	0	0	0	Luisa	Old
A_13	8749	63	34	1	34_1	A	30	13	43567	29	43770	1	35	17	17	8	8	1	0	0		1	0	0	0	Luisa	Old
A_13	8750	63	34	1	34_1	A	30	13	43567	30	43777	1	31	15	15	0	13	2	0	0		1	0	0	0	Jan	Old
A_13	8751	63	34	1	34_1	A	30	13	43567	31	43784	1	29	10	18	0	16	2	0	0		1	0	0	0	Luisa	Old
A_13	8752	63	34	1	34_1	A	30	13	43567	32	43791	1	30	12	11	0	8	3	0	0		1	0	0	0	Luisa	Old
A_13	8753	63	34	1	34_1	A	30	13	43567	33	43798	1	30	12	13	2	10	1	0	0		1	0	0	0	Luisa	Old
A_13	8741	63	34	1	34_1	A	30	13	43567	21	43714	1	45	9	31	26	3	2	0	0		1	0	0	0	Luisa	Old
A_13	8755	63	34	1	34_1	A	30	13	43567	35	43812	1	25	10	11	0	10	1	0	0		1	0	0	0	Luisa	Old
A_13	8756	63	34	1	34_1	A	30	13	43567	36	43819	1	27	11	8	0	7	1	0	0		1	0	0	0	Luisa	Old
A_13	8757	63	34	1	34_1	A	30	13	43567	37	43822	1	25	9	5	5	0	0	0	5		1	0	0	0	Luisa	Old
A_13	8758	63	34	1	34_1	A	30	13	43567	38	43833	1								0				0	0	Luisa	Old
A_13	8759	63	34	1	34_1	A	30	13	43567	39	43840	1	23	0	20	2	16	2	0	0				0	0	Luisa	Old
A_13	8760	63	34	1	34_1	A	30	13	43567	40	43847	1	20	0	11	0	10	1	0	0				0	0	Luisa	Old
A_13	8761	63	34	1	34_1	A	30	13	43567	41	43854	1	8	0	1	0	1	0	0	0				0	0	Luisa	Old
A_13	8747	63	34	1	34_1	A	30	13	43567	27	43756	1	34	12	11	11	0	0	0	0		1	0	0	0	Luisa	Old
A_13	8754	63	34	1	34_1	A	30	13	43567	34	43805	1	29	11	13	0	12	1	0	0		1	0	0	0	Jan	Old
A_17	1	56	48	1	48_1	A	30	17	43479	1	43486	0	30	0	0	0	0	0	0	0		1	0	0	0	Luisa	Old
A_17	2	56	48	1	48_1	A	30	17	43479	2	43493	0	30	0	0	0	0	0	0	0		1	0	0	0	Luisa	Old
A_17	3	56	48	1	48_1	A	30	17	43479	3	43500	1	24	9	4	4	0	0	0	6		1	0	0	0	Luisa	Old
A_17	4	56	48	1	48_1	A	30	17	43479	4	43507	1	30	8	2	2	0	0	0	0		1	0	0	0	Luisa	Old
A_17	5	56	48	1	48_1	A	30	17	43479	5	43514	1	30	8	2	2	0	0	0	0		1	0	0	0	Luisa	Old
A_17	6	56	48	1	48_1	A	30	17	43479	6	43521	1	29	10	9	9	0	0	0	0		1	0	0	0	Luisa	Old
A_17	7	56	48	1	48_1	A	30	17	43479	7	43528	1	26	8	10	10	0	0	0	0		1	0	0	0	Luisa	Old
A_17	8	56	48	1	48_1	A	30	17	43479	8	43535	1	32	12	11	11	0	0	0	0		1	0	0	0	Jan	Old
A_17	9	56	48	1	48_1	A	30	17	43479	9	43542	1	29	9	9	9	0	0	0	0		1	0	0	0	Jan	Old
A_17	10	56	48	1	48_1	A	30	17	43479	10	43549	1	34	17	17	17	0	0	0	0		1	0	0	0	Jan	Old
A_17	11	56	48	1	48_1	A	30	17	43479	11	43556	1	34	13	17	16	1	0	0	0		1	0	0	0	Luisa	Old
A_17	12	56	48	1	48_1	A	30	17	43479	12	43563	1	37	15	16	14	2	0	0	0		1	0	0	0	Luisa	Old
A_17	13	56	48	1	48_1	A	30	17	43479	13	43570	1	40	12	22	17	4	1	0	0		1	0	0	0	Luisa	Old
A_17	14	56	48	1	48_1	A	30	17	43479	14	43577	1	38	10	24	19	5	0	0	0		1	0	0	0	Luisa	Old
A_17	15	56	48	1	48_1	A	30	17	43479	15	43584	1	37	16	26	25	1	0	0	0		1	0	0	0	Luisa	Old
A_17	16	56	48	1	48_1	A	30	17	43479	16	43591	1	39	19	28	21	6	1	0	0		1	0	0	0	Luisa	Old
A_17	17	56	48	1	48_1	A	30	17	43479	17	43598	1	47	21	20	11	6	3	0	0		1	0	0	0	Luisa	Old
A_17	18	56	48	1	48_1	A	30	17	43479	18	43605	1	36	21	13	10	2	1	0	0		1	0	0	0	Luisa	Old
A_17	19	56	48	1	48_1	A	30	17	43479	19	43612	1	32	20	25	23	1	1	0	0		1	0	0	0	Julia	Old
A_17	20	56	48	1	48_1	A	30	17	43479	20	43619	1	40	21	24	24	0	0	0	0		1	0	0	0	Julia	Old
A_17	21	56	48	1	48_1	A	30	17	43479	21	43626	1	38	22	28	20	8	0	0	0		1	0	0	0	Luisa	Old
A_17	22	56	48	1	48_1	A	30	17	43479	22	43633	1	40	17	37	32	3	2	0	0		1	0	0	0	Luisa	Old
A_17	23	56	48	1	48_1	A	30	17	43479	23	43640	1	48	30	38	29	7	2	0	0		1	0	0	0	Luisa	Old
A_17	24	56	48	1	48_1	A	30	17	43479	24	43647	1	45	20	29	15	12	2	0	0		1	0	0	0	Luisa	Old
A_17	25	56	48	1	48_1	A	30	17	43479	25	43654	1	41	19	43	24	15	3	1	0		1	0	0	0	Luisa	Old
A_17	26	56	48	1	48_1	A	30	17	43479	26	43661	1	37	10	34	19	10	5	0	0		1	0	0	0	Luisa	Old
A_17	27	56	48	1	48_1	A	30	17	43479	27	43668	1	43	13	27	7	20	0	0	0		1	0	0	0	Luisa	Old
A_17	28	56	48	1	48_1	A	30	17	43479	28	43675	1	30	17	30	1	28	1	0	0		1	0	0	0	Luisa	Old
A_17	29	56	48	1	48_1	A	30	17	43479	29	43682	1	31	15	21	1	20	0	0	0		1	0	0	0	Luisa	Old
A_17	30	56	48	1	48_1	A	30	17	43479	30	43689	1	28	12	22	0	20	2	0	0		1	0	0	0	Luisa	Old
A_17	31	56	48	1	48_1	A	30	17	43479	31	43696	1	26	14	4	4	0	0	0	0		1	0	0	0	Luisa	Old
A_17	32	56	48	1	48_1	A	30	17	43479	32	43703	1	23	11	18	3	13	2	0	5		1	0	0	0	Luisa	Old
A_17	33	56	48	1	48_1	A	30	17	43479	33	43710	1	18	14	12	1	11	0	0	12		1	0	0	0	Luisa	Old
A_17	34	56	48	1	48_1	A	30	17	43479	34	43717	1	27	12	11	0	10	1	0	3		1	0	0	0	Luisa	Old
A_17	35	56	48	1	48_1	A	30	17	43479	35	43724	1	27	18	16	1	14	0	1	3		1	0	0	0	Luisa	Old
A_17	36	56	48	1	48_1	A	30	17	43479	36	43731	1	22	16	10	0	9	1	0	8		1	0	0	0	Luisa	Old
A_17	37	56	48	1	48_1	A	30	17	43479	37	43738	1	27	15	11	1	9	1	0	3		1	0	0	0	Luisa	Old
A_17	38	56	48	1	48_1	A	30	17	43479	38	43745	1	20	16	19	3	15	1	0	8		1	0	0	0	Luisa	Old
A_17	39	56	48	1	48_1	A	30	17	43479	39	43752	1	25	16	10	2	8	0	0	3		1	0	0	0	Luisa	Old
A_17	40	56	48	1	48_1	A	30	17	43479	40	43759	1	27	14	13	0	11	2	0	3		1	0	0	0	Luisa	Old
A_17	41	56	48	1	48_1	A	30	17	43479	41	43766	1	25	18	14	0	14	0	0	5		1	0	0	0	Luisa	Old
A_17	42	56	48	1	48_1	A	30	17	43479	42	43773	1	25	13	12	1	10	1	0	5		1	0	0	0	Jan	Old
A_17	43	56	48	1	48_1	A	30	17	43479	43	43780	1	21	10	13	2	10	1	0	9		1	0	0	0	Luisa	Old
A_17	44	56	48	1	48_1	A	30	17	43479	44	43787	1	29	13	14	5	9	0	0	0		1	0	0	0	Luisa	Old
A_17	45	56	48	1	48_1	A	30	17	43479	45	43794	1	28	18	10	1	8	1	0	0		1	0	0	0	Luisa	Old
A_17	46	56	48	1	48_1	A	30	17	43479	46	43801	1	26	14	10	0	8	2	0	4		1	0	0	0	Luisa	Old
A_17	47	56	48	1	48_1	A	30	17	43479	47	43808	1	25	13	6	0	5	1	0	5		1	0	0	0	Luisa	Old
A_17	48	56	48	1	48_1	A	30	17	43479	48	43815	1	26	12	7	1	4	2	0	4		1	0	0	0	Luisa	Old
A_17	49	56	48	1	48_1	A	30	17	43479	49	43822	1	27	14	9	1	7	1	0	3		1	0	0	0	Luisa	Old
A_17	50	56	48	1	48_1	A	30	17	43479	50	43829	1								0				0	0	Luisa	Old
A_17	51	56	48	1	48_1	A	30	17	43479	51	43836	1	25	0	17	1	15	1	0	0				0	0	Luisa	Old
A_17	52	56	48	1	48_1	A	30	17	43479	52	43843	1	48	0	21	21	0	0	0	0				0	0	Luisa	Old
A_17	53	56	48	1	48_1	A	30	17	43479	53	43850	1	26	0	1	0	1	0	0	0				0	0	Luisa	Old
A_17	11892	56	48	1	48_1	A	30	17	43479	53	7	1	24	0	8	1	6	1	0	0		0		0	0	Luisa	Old
A_17	9091	56	48	1	48_1	A	30	17	43479	52	43889	1	27	0	7	1	6	0	0	0		0		0	0	Luisa	Old
A_20	4721	61	34	11	34_11	A	30	20	43530	1	43537	0	29	0	4	4	0	0	0	0		1	0	0	0	Jan	Middle
A_20	4723	61	34	11	34_11	A	30	20	43530	3	43551	1	32	8	2	2	0	0	0	0		1	0	0	0	Julia	Middle
A_20	4725	61	34	11	34_11	A	30	20	43530	5	43565	1	25	16	2	2	0	0	0	3		1	0	0	0	Luisa	Middle
A_20	4726	61	34	11	34_11	A	30	20	43530	6	43572	1	27	14	10	9	0	1	0	3		1	0	0	0	Luisa	Middle
A_20	4727	61	34	11	34_11	A	30	20	43530	7	43579	1	31	23	11	9	2	0	0	0		1	0	0	0	Luisa	Middle
A_20	4724	61	34	11	34_11	A	30	20	43530	4	43558	1	32	9	0	0	0	0	0	0		1	0	0	0	Luisa	Middle
A_20	4729	61	34	11	34_11	A	30	20	43530	9	43593	1	29	10	18	18	0	0	0	0		1	0	0	0	Luisa	Middle
A_20	4730	61	34	11	34_11	A	30	20	43530	10	43600	1	32	8	23	19	3	1	0	0		1	0	0	0	Luisa	Middle
A_20	4731	61	34	11	34_11	A	30	20	43530	11	43607	1	45	6	24	16	6	2	0	0		1	0	0	0	Luisa	Middle
A_20	4732	61	34	11	34_11	A	30	20	43530	12	43614	1	37	5	10	10	0	0	0	0		1	0	0	0	Luisa	Middle
A_20	4733	61	34	11	34_11	A	30	20	43530	13	43621	1	38	4	12	12	0	0	0	0		1	0	0	0	Julia	Middle
A_20	4734	61	34	11	34_11	A	30	20	43530	14	43628	1	38	4	9	6	3	0	0	0		1	0	0	0	Luisa	Middle
A_20	4722	61	34	11	34_11	A	30	20	43530	2	43544	1	25	6	6	6	0	0	0	5		1	0	0	0	Jan	Middle
A_20	4736	61	34	11	34_11	A	30	20	43530	16	43642	1	34	11	4	4	0	0	0	0		1	0	0	0	Luisa	Middle
A_20	4737	61	34	11	34_11	A	30	20	43530	17	43649	1	32	13	3	3	0	0	0	0		1	0	0	0	Luisa	Middle
A_20	4738	61	34	11	34_11	A	30	20	43530	18	43656	1	30	4	4	4	0	0	0	0		1	0	0	0	Luisa	Middle
A_20	4739	61	34	11	34_11	A	30	20	43530	19	43663	1	30	12	11	10	1	0	0	0		1	0	0	0	Luisa	Middle
A_20	4740	61	34	11	34_11	A	30	20	43530	20	43670	1	34	14	15	15	0	0	0	0		1	0	0	0	Luisa	Middle
A_20	4728	61	34	11	34_11	A	30	20	43530	8	43586	1	35	14	11	11	0	0	0	0		1	0	0	0	Luisa	Middle
A_20	4742	61	34	11	34_11	A	30	20	43530	22	43684	1	42	6	19	18	0	1	0	0				0	0		Middle
A_20	4743	61	34	11	34_11	A	30	20	43530	23	43691	1	45	0	14	12	2	0	0	0				0	0	Luisa	Middle
A_20	4744	61	34	11	34_11	A	30	20	43530	24	43698	1	47	0	15	6	8	1	0	0				0	0	Luisa	Middle
A_20	4745	61	34	11	34_11	A	30	20	43530	25	43705	1	51	0	11	11	0	0	0	0				0	0	Luisa	Middle
A_20	4746	61	34	11	34_11	A	30	20	43530	26	43712	1	43	0	2	0	2	0	0	0				0	0	Luisa	Middle
A_20	4735	61	34	11	34_11	A	30	20	43530	15	43635	1	30	9	7	4	3	0	0	0		1	0	0	0	Luisa	Middle
A_20	4741	61	34	11	34_11	A	30	20	43530	21	43677	1	34	18	36	18	18	0	0	0		1	0	0	0	Luisa	Middle
A_26	11762	65	48	8	48_8	A	30	26	43532	2	43546	0	22	0	3	3	0	0	0	8		1	0	0	0	Jan	Middle
A_26	11763	65	48	8	48_8	A	30	26	43532	3	43553	0	26	0	1	1	0	0	0	3		1	0	0	0	Jan	Middle
A_26	11764	65	48	8	48_8	A	30	26	43532	4	43560	0	27	4	0	0	0	0	0	3		1	0	0	0	Luisa	Middle
A_26	11761	65	48	8	48_8	A	30	26	43532	1	43539	0	30	0	0	0	0	0	0	0		1	0	0	0	Jan	Middle
A_26	11766	65	48	8	48_8	A	30	26	43532	6	43574	1	27	4	0	0	0	0	0	3		1	0	0	0	Luisa	Middle
A_26	11767	65	48	8	48_8	A	30	26	43532	7	43581	1	26	6	1	1	0	0	0	4		1	0	0	0	Luisa	Middle
A_26	11768	65	48	8	48_8	A	30	26	43532	8	43588	1	33	4	5	5	0	0	0	0		1	0	0	0	Luisa	Middle
A_26	11765	65	48	8	48_8	A	30	26	43532	5	43567	1	35	9	2	2	0	0	0	4		1	0	0	0	Luisa	Middle
A_26	11770	65	48	8	48_8	A	30	26	43532	10	43602	1	30	4	9	9	0	0	0	0		1	0	0	0	Luisa	Middle
A_26	11771	65	48	8	48_8	A	30	26	43532	11	43609	1	34	5	8	6	1	1	0	0		1	0	0	0	Luisa	Middle
A_26	11772	65	48	8	48_8	A	30	26	43532	12	43616	1	30	4	2	0	2	0	0	0		1	0	0	0	Luisa	Middle
A_26	11769	65	48	8	48_8	A	30	26	43532	9	43595	1	32	4	6	6	0	0	0	0		1	0	0	0	Luisa	Middle
A_26	11774	65	48	8	48_8	A	30	26	43532	14	43630	1	26	4	4	3	1	0	0	3		1	0	0	0	Luisa	Middle
A_26	11775	65	48	8	48_8	A	30	26	43532	15	43637	1	31	3	2	1	0	1	0	0		1	0	0	0	Luisa	Middle
A_26	11776	65	48	8	48_8	A	30	26	43532	16	43644	1	29	5	3	1	2	0	0	0		1	0	0	0	Luisa	Middle
A_26	11777	65	48	8	48_8	A	30	26	43532	17	43651	1	30	3	1	0	1	0	0	0		1	0	0	0	Luisa	Middle
A_26	11778	65	48	8	48_8	A	30	26	43532	18	43658	1	32	2	3	0	2	1	0	0		1	0	0	0	Luisa	Middle
A_26	11779	65	48	8	48_8	A	30	26	43532	19	43665	1	29	5	3	1	2	0	0	0		1	0	0	0	Luisa	Middle
A_26	11780	65	48	8	48_8	A	30	26	43532	20	43672	1	28	7	4	2	2	0	0	0		1	0	0	0	Luisa	Middle
A_26	11781	65	48	8	48_8	A	30	26	43532	21	43679	1	28	9	4	2	1	1	0	0		1	0	0	0	Luisa	Middle
A_26	11782	65	48	8	48_8	A	30	26	43532	22	43686	1	26	0	2	0	1	1	0	0				0	0	Luisa	Middle
A_26	11783	65	48	8	48_8	A	30	26	43532	23	43693	1	24	0	3	2	1	0	0	0				0	0	Luisa	Middle
A_26	11784	65	48	8	48_8	A	30	26	43532	24	43700	1	22	0	7	6	1	0	0	0				0	0	Luisa	Middle
A_26	11785	65	48	8	48_8	A	30	26	43532	25	43707	1	24	0	10	7	3	0	0	0				0	0	Luisa	Middle
A_26	11773	65	48	8	48_8	A	30	26	43532	13	43623	1	32	3	4	3	1	0	0	0		1	0	0	0	Julia	Middle
A_8	3922	66	41	15	41_15	A	30	8	43522	2	43535	0	29	5	8	8	0	0	0	0		1	0	0	0	Julia	Middle
A_8	3923	66	41	15	41_15	A	30	8	43522	3	43542	1	35	10	6	6	0	0	0	0		1	0	0	0	Jan	Middle
A_8	3925	66	41	15	41_15	A	30	8	43522	5	43556	1	31	8	3	3	0	0	0	0		1	0	0	0	Luisa	Middle
A_8	3926	66	41	15	41_15	A	30	8	43522	6	43563	1	29	5	8	8	0	0	0	0		1	0	0	0	Luisa	Middle
A_8	3927	66	41	15	41_15	A	30	8	43522	7	43570	1	30	11	8	8	0	0	0	0		1	0	0	0	Luisa	Middle
A_8	3924	66	41	15	41_15	A	30	8	43522	4	43549	1	31	8	3	3	0	0	0	0		1	0	0	0	Jan	Middle
A_8	3929	66	41	15	41_15	A	30	8	43522	9	43584	1	33	14	11	11	0	0	0	0		1	0	0	0	Luisa	Middle
A_8	3930	66	41	15	41_15	A	30	8	43522	10	43591	1	36	29	14	14	0	0	0	0		1	0	0	0	Luisa	Middle
A_8	3931	66	41	15	41_15	A	30	8	43522	11	43598	1	38	30	15	14	1	0	0	0		1	0	0	0	Luisa	Middle
A_8	3932	66	41	15	41_15	A	30	8	43522	12	43605	1	37	29	24	18	5	1	0	0		1	0	0	0	Luisa	Middle
A_8	3933	66	41	15	41_15	A	30	8	43522	13	43612	1	38	30	29	25	4	0	1	0		1	0	0	0	Jan	Middle
A_8	3934	66	41	15	41_15	A	30	8	43522	14	43619	1	39	33	29	23	6	0	0	0		1	0	0	0	Julia	Middle
A_8	3935	66	41	15	41_15	A	30	8	43522	15	43626	1	43	40	38	33	3	2	1	0		1	0	0	0	Luisa	Middle
A_8	3936	66	41	15	41_15	A	30	8	43522	16	43633	1	47	23	38	31	7	0	0	0		1	0	0	0	Luisa	Middle
A_8	3937	66	41	15	41_15	A	30	8	43522	17	43640	1	43	43	41	36	5	0	0	0		1	0	0	0	Luisa	Middle
A_8	3938	66	41	15	41_15	A	30	8	43522	18	43647	1	43	52	52	52	0	0	0	0		1	0	0	0	Luisa	Middle
A_8	3939	66	41	15	41_15	A	30	8	43522	19	43654	1	55	30	44	42	0	2	0	0		1	0	0	0	Luisa	Middle
A_8	3940	66	41	15	41_15	A	30	8	43522	20	43661	1	60	56	59	56	3	0	0	0		1	0	0	0	Luisa	Middle
A_8	3928	66	41	15	41_15	A	30	8	43522	8	43577	1	34	12	10	10	0	0	0	0		1	0	0	0	Luisa	Middle
A_8	3942	66	41	15	41_15	A	30	8	43522	22	43675	1	56	50	46	43	3	0	0	0		1	0	0	0	Luisa	Middle
A_8	3943	66	41	15	41_15	A	30	8	43522	23	43682	1	45	10	55	47	5	3	0	0				0	0	Luisa	Middle
A_8	3944	66	41	15	41_15	A	30	8	43522	24	43689	1	62	0	32	31	1	0	0	0				0	0	Luisa	Middle
A_8	3945	66	41	15	41_15	A	30	8	43522	25	43696	1	86	0	46	41	5	0	0	0				0	0	Luisa	Middle
A_8	3946	66	41	15	41_15	A	30	8	43522	26	43703	1	95	0	52	45	6	1	0	0				0	0	Luisa	Middle
A_8	3947	66	41	15	41_15	A	30	8	43522	27	43710	1	117	0	23	16	7	0	0	0				0	0	Luisa	Middle
A_8	3921	66	41	15	41_15	A	30	8	43522	1	43528	0	27	0	5	5	0	0	0	3		1	0	0	0	Luisa	Middle
A_8	3941	66	41	15	41_15	A	30	8	43522	21	43668	1	55	45	58	51	4	3	0	0		1	0	0	0	Luisa	Middle
B_13	162	56	48	3	48_3	B	20	13	43521	2	43535	0	22	5	2	2	0	0	0	0		1	0	0	0	Jan	Middle
B_13	163	56	48	3	48_3	B	20	13	43521	3	43542	1	20	7	10	10	0	0	0	0		1	0	0	0	Jan	Middle
B_13	161	56	48	3	48_3	B	20	13	43521	1	43528	0	18	0	0	0	0	0	0	2		1	0	0	0	Luisa	Middle
B_13	166	56	48	3	48_3	B	20	13	43521	6	43563	1	19	13	12	12	0	0	0	0		1	0	0	0	Luisa	Middle
B_13	167	56	48	3	48_3	B	20	13	43521	7	43570	1	22	7	11	11	0	0	0	0		1	0	0	0	Luisa	Middle
B_13	168	56	48	3	48_3	B	20	13	43521	8	43577	1	26	18	15	12	3	0	0	0		1	0	0	0	Luisa	Middle
B_13	165	56	48	3	48_3	B	20	13	43521	5	43556	1	23	13	4	4	0	0	0	0		1	0	0	0	Luisa	Middle
B_13	170	56	48	3	48_3	B	20	13	43521	10	43591	1	25	25	17	14	2	1	0	0		1	0	0	0	Luisa	Middle
B_13	171	56	48	3	48_3	B	20	13	43521	11	43598	1	25	34	21	20	0	1	0	0		1	0	0	0	Luisa	Middle
B_13	172	56	48	3	48_3	B	20	13	43521	12	43605	1	28	39	21	20	1	0	0	0		1	0	0	0	Luisa	Middle
B_13	173	56	48	3	48_3	B	20	13	43521	13	43612	1	28	25	12	10	2	0	0	0		1	0	0	0	Jan	Middle
B_13	174	56	48	3	48_3	B	20	13	43521	14	43619	1	21	17	22	15	6	1	0	0		1	0	0	0	Jan	Middle
B_13	175	56	48	3	48_3	B	20	13	43521	15	43626	1	24	38	19	19	0	0	0	0		1	0	0	0	Luisa	Middle
B_13	176	56	48	3	48_3	B	20	13	43521	16	43633	1	22	27	14	13	1	0	0	0		1	0	0	0	Luisa	Middle
B_13	164	56	48	3	48_3	B	20	13	43521	4	43549	1	21	8	5	5	0	0	0	0		1	0	0	0	Jan	Middle
B_13	178	56	48	3	48_3	B	20	13	43521	18	43647	1	29	37	20	18	2	0	0	0		1	0	0	0	Luisa	Middle
B_13	179	56	48	3	48_3	B	20	13	43521	19	43654	1	24	43	23	19	4	0	0	0		1	0	0	0	Luisa	Middle
B_13	180	56	48	3	48_3	B	20	13	43521	20	43661	1	31	41	18	17	1	0	0	0		1	0	0	0	Luisa	Middle
B_13	181	56	48	3	48_3	B	20	13	43521	21	43668	1	26	31	25	24	1	0	0	0		1	0	0	0	Luisa	Middle
B_13	169	56	48	3	48_3	B	20	13	43521	9	43584	1	23	18	17	16	1	0	0	0		1	0	0	0	Luisa	Middle
B_13	183	56	48	3	48_3	B	20	13	43521	23	43682	1	30	18	30	25	4	1	0	0				0	0	Luisa	Middle
B_13	184	56	48	3	48_3	B	20	13	43521	24	43689	1	41	0	20	19	1	0	0	0				0	0	Luisa	Middle
B_13	185	56	48	3	48_3	B	20	13	43521	25	43696	1	53	0	24	18	4	2	0	0				0	0	Luisa	Middle
B_13	186	56	48	3	48_3	B	20	13	43521	26	43703	1	48	0	32	18	13	1	0	0				0	0	Luisa	Middle
B_13	187	56	48	3	48_3	B	20	13	43521	27	43710	1	57	0	20	10	10	0	0	0				0	0	Luisa	Middle
B_13	188	56	48	3	48_3	B	20	13	43521	28	43717	1	63	0	2	2	0	0	0	0				0	0	Luisa	Middle
B_13	182	56	48	3	48_3	B	20	13	43521	22	43675	1	31	43	33	26	7	0	0	0		1	0	0	0	Luisa	Middle
B_13	177	56	48	3	48_3	B	20	13	43521	17	43640	1	30	26	14	12	1	1	0	0		1	0	0	0	Luisa	Middle
B_19	2642	58	48	11	48_11	B	20	19	43483	2	43493	0	20	0	0	0	0	0	0	0		1	0	0	0	Luisa	Old
B_19	2644	58	48	11	48_11	B	20	19	43483	4	43507	1	23	0	5	5	0	0	0	0		1	0	0	0	Luisa	Old
B_19	2645	58	48	11	48_11	B	20	19	43483	5	43514	1	21	6	0	0	0	0	0	0		1	0	0	0	Luisa	Old
B_19	2646	58	48	11	48_11	B	20	19	43483	6	43521	1	20	8	2	2	0	0	0	0		1	0	0	0	Luisa	Old
B_19	2643	58	48	11	48_11	B	20	19	43483	3	43500	1	20	0	0	0	0	0	0	0		1	0	0	0	Luisa	Old
B_19	2648	58	48	11	48_11	B	20	19	43483	8	43535	1	21	12	7	7	0	0	0	0		1	0	0	0	Julia	Old
B_19	2649	58	48	11	48_11	B	20	19	43483	9	43542	1	21	15	13	13	0	0	0	0		1	0	0	0	Jan	Old
B_19	2650	58	48	11	48_11	B	20	19	43483	10	43549	1	23	18	13	13	0	0	0	0		1	0	0	0	Jan	Old
B_19	2651	58	48	11	48_11	B	20	19	43483	11	43556	1	25	22	7	7	0	0	0	0		1	0	0	0	Luisa	Old
B_19	2652	58	48	11	48_11	B	20	19	43483	12	43563	1	23	25	12	11	1	0	0	0		1	0	0	0	Luisa	Old
B_19	2653	58	48	11	48_11	B	20	19	43483	13	43570	1	28	27	19	18	1	0	0	0		1	0	0	0	Luisa	Old
B_19	2641	58	48	11	48_11	B	20	19	43483	1	43486	0	20	0	0	0	0	0	0	0		1	0	0	0	Luisa	Old
B_19	2655	58	48	11	48_11	B	20	19	43483	15	43584	1	34	15	19	16	3	0	0	0		1	0	0	1	Luisa	Old
B_19	2656	58	48	11	48_11	B	20	19	43483	16	43591	1	25	10	15	10	5	0	0	0		1	0	0	0	Luisa	Old
B_19	2657	58	48	11	48_11	B	20	19	43483	17	43598	1	33	16	14	14	0	0	0	0		1	0	0	0	Luisa	Old
B_19	2658	58	48	11	48_11	B	20	19	43483	18	43605	1	22	8	11	11	0	0	0	0		1	0	0	0	Luisa	Old
B_19	2659	58	48	11	48_11	B	20	19	43483	19	43612	1	28	17	8	5	2	1	0	0		1	0	0	0	Jan	Old
B_19	2647	58	48	11	48_11	B	20	19	43483	7	43528	1	19	8	4	4	0	0	0	0		1	0	0	0	Luisa	Old
B_19	2661	58	48	11	48_11	B	20	19	43483	21	43626	1	23	20	19	17	1	1	0	0		1	0	0	0	Luisa	Old
B_19	2662	58	48	11	48_11	B	20	19	43483	22	43633	1	25	18	26	20	6	0	0	0		1	0	0	0	Luisa	Old
B_19	2663	58	48	11	48_11	B	20	19	43483	23	43640	1	31	24	25	24	0	1	0	0		1	0	0	0	Luisa	Old
B_19	2664	58	48	11	48_11	B	20	19	43483	24	43647	1	29	24	42	37	3	2	0	0		1	0	0	0	Luisa	Old
B_19	2665	58	48	11	48_11	B	20	19	43483	25	43654	1	30	15	39	39	0	0	0	0		1	0	0	0	Luisa	Old
B_19	2666	58	48	11	48_11	B	20	19	43483	26	43661	1	52	39	42	34	6	2	0	0		1	0	0	0	Luisa	Old
B_19	2654	58	48	11	48_11	B	20	19	43483	14	43577	1	25	9	19	16	3	0	0	0		1	0	0	1	Luisa	Old
B_19	2668	58	48	11	48_11	B	20	19	43483	28	43675	1	41	31	33	27	4	2	0	0		1	0	0	0	Luisa	Old
B_19	2669	58	48	11	48_11	B	20	19	43483	29	43682	1	25	24	50	42	8	0	0	0		1	0	0	0	Luisa	Old
B_19	2670	58	48	11	48_11	B	20	19	43483	30	43689	1	39	23	43	38	5	0	0	0		1	0	0	0	Luisa	Old
B_19	2671	58	48	11	48_11	B	20	19	43483	31	43696	1	42	12	42	37	4	1	0	0		1	0	0	0	Luisa	Old
B_19	2672	58	48	11	48_11	B	20	19	43483	32	43703	1	38	32	25	19	2	4	0	0		1	0	0	0	Luisa	Old
B_19	2660	58	48	11	48_11	B	20	19	43483	20	43619	1	23	19	9	7	2	0	0	0		1	0	0	0	Julia	Old
B_19	2674	58	48	11	48_11	B	20	19	43483	34	43717	1	28	24	18	0	17	1	0	0		1	0	0	0	Luisa	Old
B_19	2675	58	48	11	48_11	B	20	19	43483	35	43724	1	17	8	29	0	26	3	0	4		1	0	0	0	Luisa	Old
B_19	2676	58	48	11	48_11	B	20	19	43483	36	43731	1	22	18	25	0	22	3	0	0		1	0	0	0	Luisa	Old
B_19	2677	58	48	11	48_11	B	20	19	43483	37	43738	1	15	18	28	15	13	0	0	5		1	0	0	0	Luisa	Old
B_19	2678	58	48	11	48_11	B	20	19	43483	38	43745	1	20	22	35	35	0	0	0	0		1	0	0	0	Luisa	Old
B_19	2679	58	48	11	48_11	B	20	19	43483	39	43752	1	28	18	32	32	0	0	0	0		1	0	0	0	Luisa	Old
B_19	2680	58	48	11	48_11	B	20	19	43483	40	43759	1	37	14	26	25	0	1	0	0		1	0	0	0	Luisa	Old
B_19	2681	58	48	11	48_11	B	20	19	43483	41	43766	1	34	21	37	12	21	4	0	0		1	0	0	0	Luisa	Old
B_19	2682	58	48	11	48_11	B	20	19	43483	42	43773	1	35	19	23	0	23	0	0	0		1	0	0	0	Jan	Old
B_19	2683	58	48	11	48_11	B	20	19	43483	43	43780	1	18	19	16	0	16	0	0	0		1	0	0	0	Luisa	Old
B_19	2684	58	48	11	48_11	B	20	19	43483	44	43787	1	15	14	16	0	14	2	0	5		1	0	0	0	Luisa	Old
B_19	2685	58	48	11	48_11	B	20	19	43483	45	43794	1	20	2	13	0	13	0	0	0		1	0	0	0	Luisa	Old
B_19	2686	58	48	11	48_11	B	20	19	43483	46	43801	1	19	0	17	1	16	0	0	0				0	0	Luisa	Old
B_19	2687	58	48	11	48_11	B	20	19	43483	47	43808	1	18	0	6	2	4	0	0	0				0	0	Luisa	Old
B_19	2688	58	48	11	48_11	B	20	19	43483	48	43815	1	20	0	4	4	0	0	0	0				0	0	Luisa	Old
B_19	2689	58	48	11	48_11	B	20	19	43483	49	43822	1	19	0	5	5	0	0	0	0				0	0	Luisa	Old
B_19	2667	58	48	11	48_11	B	20	19	43483	27	43668	1	41	28	28	20	5	3	0	0		1	0	0	0	Luisa	Old
B_19	2673	58	48	11	48_11	B	20	19	43483	33	43710	1	45	29	24	7	17	0	0	0		1	0	0	0	Luisa	Old
B_29	10081	64	34	10	34_10	B	20	29	43532	1	43539	0	15	0	1	1	0	0	0	5		1	0	0	0	Jan	Middle
B_29	10083	64	34	10	34_10	B	20	29	43532	3	43553	1	15	6	3	3	0	0	0	5		1	0	0	0	Jan	Middle
B_29	10084	64	34	10	34_10	B	20	29	43532	4	43560	1	20	9	4	4	0	0	0	0		1	0	0	0	Luisa	Middle
B_29	10085	64	34	10	34_10	B	20	29	43532	5	43567	1	20	7	2	2	0	0	0	0		1	0	0	0	Luisa	Middle
B_29	10086	64	34	10	34_10	B	20	29	43532	6	43574	1	20	14	7	7	0	0	0	0		1	0	0	0	Luisa	Middle
B_29	10087	64	34	10	34_10	B	20	29	43532	7	43581	1	21	11	11	10	0	1	0	0		1	0	0	0	Luisa	Middle
B_29	10088	64	34	10	34_10	B	20	29	43532	8	43588	1	25	15	11	11	0	0	0	0		1	0	0	0	Luisa	Middle
B_29	10089	64	34	10	34_10	B	20	29	43532	9	43595	1	26	15	11	11	0	0	0	0		1	0	0	0	Luisa	Middle
B_29	10090	64	34	10	34_10	B	20	29	43532	10	43602	1	26	28	17	17	0	0	0	0		1	0	0	0	Luisa	Middle
B_29	10091	64	34	10	34_10	B	20	29	43532	11	43609	1	30	5	16	14	2	0	0	0		1	0	0	0	Luisa	Middle
B_29	10092	64	34	10	34_10	B	20	29	43532	12	43616	1	25	2	17	13	3	1	0	0		1	0	0	0	Luisa	Middle
B_29	10093	64	34	10	34_10	B	20	29	43532	13	43623	1	28	2	22	17	5	0	0	0		1	0	0	0	Julia	Middle
B_29	10094	64	34	10	34_10	B	20	29	43532	14	43630	1	29	5	21	21	0	0	0	0		1	0	0	0	Luisa	Middle
B_29	10082	64	34	10	34_10	B	20	29	43532	2	43546	1	21	5	1	1	0	0	0	0		1	0	0	0	Jan	Middle
B_29	10096	64	34	10	34_10	B	20	29	43532	16	43644	1	31	4	5	3	2	0	0	0		1	0	0	0	Luisa	Middle
B_29	10097	64	34	10	34_10	B	20	29	43532	17	43651	1	20	3	4	1	2	1	0	0		1	0	0	0	Luisa	Middle
B_29	10098	64	34	10	34_10	B	20	29	43532	18	43658	1	23	1	1	1	0	0	0	0		1	0	0	0	Luisa	Middle
B_29	10099	64	34	10	34_10	B	20	29	43532	19	43665	1	19	2	2	2	0	0	0	0		1	0	0	0	Luisa	Middle
B_29	10100	64	34	10	34_10	B	20	29	43532	20	43672	1	20	6	3	2	0	1	0	0		1	0	0	0	Luisa	Middle
B_29	10101	64	34	10	34_10	B	20	29	43532	21	43679	1	20	4	1	1	0	0	0	0		1	0	0	0	Luisa	Middle
B_29	10102	64	34	10	34_10	B	20	29	43532	22	43686	1	20	0	0	0	0	0	0	0				0	0	Luisa	Middle
B_29	10103	64	34	10	34_10	B	20	29	43532	23	43693	1	19	0	1	1	0	0	0	0				0	0	Luisa	Middle
B_29	10104	64	34	10	34_10	B	20	29	43532	24	43700	1	18	0	2	2	0	0	0	0				0	0	Luisa	Middle
B_29	10095	64	34	10	34_10	B	20	29	43532	15	43637	1	29	4	15	12	3	0	0	0		1	0	0	0	Luisa	Middle
B_32	12801	65	48	5	48_5	B	20	32	43595	1	43602	0	22	0	7	7	0	0	0	0		1	0	0	0	Luisa	Old
B_32	12802	65	48	5	48_5	B	20	32	43595	2	43609	1	17	5	11	11	0	0	0	0		1	0	0	0	Luisa	Old
B_32	12803	65	48	5	48_5	B	20	32	43595	3	43616	1	21	9	6	6	0	0	0	0		1	0	0	0	Luisa	Old
B_32	12804	65	48	5	48_5	B	20	32	43595	4	43623	1	18	6	1	1	0	0	0	2		1	0	0	0	Jan	Old
B_32	12805	65	48	5	48_5	B	20	32	43595	5	43630	1	22	6	0	0	0	0	0	0		1	0	0	0	Luisa	Old
B_32	12806	65	48	5	48_5	B	20	32	43595	6	43637	1	19	7	2	2	0	0	0	0		1	0	0	0	Luisa	Old
B_32	12807	65	48	5	48_5	B	20	32	43595	7	43644	1	18	8	5	5	0	0	0	0		1	0	0	0	Luisa	Old
B_32	12808	65	48	5	48_5	B	20	32	43595	8	43651	1	20	8	9	9	0	0	0	0		1	0	0	0	Luisa	Old
B_32	12809	65	48	5	48_5	B	20	32	43595	9	43658	1	19	9	8	0	0	0	0	0		1	0	0	0	Luisa	Old
B_32	12810	65	48	5	48_5	B	20	32	43595	10	43665	1	23	7	15	13	0	2	0	0		1	0	0	0	Luisa	Old
B_32	12811	65	48	5	48_5	B	20	32	43595	11	43672	1	22	17	12	10	1	1	0	0		1	0	0	0	Luisa	Old
B_32	12812	65	48	5	48_5	B	20	32	43595	12	43679	1	28	20	16	15	1	0	0	0		1	0	0	0	Luisa	Old
B_32	12813	65	48	5	48_5	B	20	32	43595	13	43686	1	24	24	21	19	2	0	0	0		1	0	0	0	Luisa	Old
B_32	12814	65	48	5	48_5	B	20	32	43595	14	43693	1	28	29	31	25	6	0	0	0		1	0	0	0	Luisa	Old
B_32	12815	65	48	5	48_5	B	20	32	43595	15	43700	1	33	35	38	36	2	0	0	0		1	0	0	0	Luisa	Old
B_32	12816	65	48	5	48_5	B	20	32	43595	16	43707	1	31	26	46	45	1	0	0	0		1	0	0	0	Luisa	Old
B_32	12817	65	48	5	48_5	B	20	32	43595	17	43714	1	39	16	31	25	5	1	0	0		1	0	0	0	Luisa	Old
B_32	12818	65	48	5	48_5	B	20	32	43595	18	43721	1	39	8	30	24	6	0	0	0		1	0	0	0	Luisa	Old
B_32	12819	65	48	5	48_5	B	20	32	43595	19	43728	1	26	5	26	22	4	0	0	0		1	0	0	0	Jan	Old
B_32	12820	65	48	5	48_5	B	20	32	43595	20	43735	1	36	7	33	28	5	0	0	0		1	0	0	0	Luisa	Old
B_32	12821	65	48	5	48_5	B	20	32	43595	21	43742	1	31	6	24	21	3	0	0	0		1	0	0	0	Luisa	Old
B_32	12822	65	48	5	48_5	B	20	32	43595	22	43749	1	35	6	8	5	3	0	0	0		1	0	0	0	Luisa	Old
B_32	12823	65	48	5	48_5	B	20	32	43595	23	43756	1	25	9	2	1	1	0	0	0		1	0	0	0	Luisa	Old
B_32	12824	65	48	5	48_5	B	20	32	43595	24	43763	1	14	7	1	1	0	0	0	6		1	0	0	0	Luisa	Old
B_32	12825	65	48	5	48_5	B	20	32	43595	25	43770	1	20	8	2	2	0	0	0	0		1	0	0	0	Luisa	Old
B_32	12826	65	48	5	48_5	B	20	32	43595	26	43777	1	20	5	0	0	0	0	0	0		1	0	0	0	Jan	Old
B_32	12827	65	48	5	48_5	B	20	32	43595	27	43784	1	21	19	1	1	0	0	0	0		1	0	0	0	Luisa	Old
B_32	12828	65	48	5	48_5	B	20	32	43595	28	43791	1	18	16	6	6	0	0	0	0		1	0	0	0	Luisa	Old
B_32	12829	65	48	5	48_5	B	20	32	43595	29	43798	1	20	18	7	7	0	0	0	0		1	0	0	0	Luisa	Old
B_32	12830	65	48	5	48_5	B	20	32	43595	30	43805	1	22	13	16	16	0	0	0	0		1	0	0	0	Luisa	Old
B_32	12831	65	48	5	48_5	B	20	32	43595	31	43812	1	21	8	24	16	8	0	0	0		1	0	0	0	Luisa	Old
B_32	12832	65	48	5	48_5	B	20	32	43595	32	43819	1	23	12	11	11	0	0	0	0		1	0	0	0	Luisa	Old
B_32	12833	65	48	5	48_5	B	20	32	43595	33	43822	1	26	12	15	15	0	0	0	0		1	0	0	0	Luisa	Old
B_32	12834	65	48	5	48_5	B	20	32	43595	34	43833	1								0				0	0	Luisa	Old
B_32	12835	65	48	5	48_5	B	20	32	43595	35	43840	1	33	0	13	7	4	2	0	0				0	0	Luisa	Old
B_32	12836	65	48	5	48_5	B	20	32	43595	36	43847	1	23	0	11	8	2	1	0	0				0	0	Luisa	Old
B_32	12837	65	48	5	48_5	B	20	32	43595	37	43854	1	28	0	14	13	1	0	0	0				0	0	Luisa	Old
B_33	12881	65	48	7	48_7	B	20	33	43529	1	43539	1	21	3	5	5	0	0	0	0		1	0	0	0	Jan	Middle
B_33	12882	65	48	7	48_7	B	20	33	43529	2	43546	1	18	7	5	5	0	0	0	0		1	0	0	0	Jan	Middle
B_33	12883	65	48	7	48_7	B	20	33	43529	3	43553	1	23	6	0	0	0	0	0	0		1	0	0	0	Jan	Middle
B_33	12884	65	48	7	48_7	B	20	33	43529	4	43560	1	19	9	0	0	0	0	0	0		1	0	0	0	Luisa	Middle
B_33	12885	65	48	7	48_7	B	20	33	43529	5	43567	1	18	11	6	6	0	0	0	2		1	0	0	0	Luisa	Middle
B_33	12886	65	48	7	48_7	B	20	33	43529	6	43574	1	18	17	11	11	0	0	0	2		1	0	0	0	Luisa	Middle
B_33	12887	65	48	7	48_7	B	20	33	43529	7	43581	1	22	14	8	8	0	0	0	0		1	0	0	0	Luisa	Middle
B_33	12888	65	48	7	48_7	B	20	33	43529	8	43588	1	22	11	11	11	0	0	0	0		1	0	0	0	Luisa	Middle
B_33	12889	65	48	7	48_7	B	20	33	43529	9	43595	1	25	19	13	12	0	1	0	0		1	0	0	0	Luisa	Middle
B_33	12890	65	48	7	48_7	B	20	33	43529	10	43602	1	26	19	11	10	1	0	0	0		1	0	0	0	Luisa	Middle
B_33	12891	65	48	7	48_7	B	20	33	43529	11	43609	1	24	8	10	10	0	0	0	0		1	0	0	0	Luisa	Middle
B_33	12892	65	48	7	48_7	B	20	33	43529	12	43616	1	25	4	20	14	6	0	0	0		1	0	0	0	Luisa	Middle
B_33	12893	65	48	7	48_7	B	20	33	43529	13	43623	1	20	3	23	22	1	0	0	0		1	0	0	0	Julia	Middle
B_33	12894	65	48	7	48_7	B	20	33	43529	14	43630	1	25	2	16	15	1	0	0	0		1	0	0	0	Luisa	Middle
B_33	12895	65	48	7	48_7	B	20	33	43529	15	43637	1	37	2	8	5	2	1	0	0		1	0	0	0	Luisa	Middle
B_33	12896	65	48	7	48_7	B	20	33	43529	16	43644	1	20	3	6	3	2	1	0	0		1	0	0	0	Luisa	Middle
B_33	12897	65	48	7	48_7	B	20	33	43529	17	43651	1	24	2	3	1	2	0	0	0		1	0	0	0	Luisa	Middle
B_33	12898	65	48	7	48_7	B	20	33	43529	18	43658	1	20	2	4	4	0	0	0	0		1	0	0	0	Luisa	Middle
B_33	12899	65	48	7	48_7	B	20	33	43529	19	43665	1	22	0	3	3	0	0	0	0		1	0	0	0	Luisa	Middle
B_33	12900	65	48	7	48_7	B	20	33	43529	20	43672	1	18	3	2	2	0	0	0	2		1	0	0	0	Luisa	Middle
B_33	12901	65	48	7	48_7	B	20	33	43529	21	43679	1	19	6	2	2	0	0	0	0		1	0	0	0	Luisa	Middle
B_33	12902	65	48	7	48_7	B	20	33	43529	22	43686	1	21	0	1	1	0	0	0	0				0	0	Luisa	Middle
B_33	12903	65	48	7	48_7	B	20	33	43529	23	43693	1	19	0	0	0	0	0	0	0				0	0	Luisa	Middle
B_33	12904	65	48	7	48_7	B	20	33	43529	24	43700	1	18	0	1	1	0	0	0	0				0	0	Luisa	Middle
B_33	12905	65	48	7	48_7	B	20	33	43529	25	43707	1	16	0	5	5	0	0	0	0				0	0	Luisa	Middle
B_35	13041	65	48	12	48_12	B	20	35	43529	1	43539	1	21	2	1	1	0	0	0	0		1	0	0	0	Jan	Middle
B_35	13042	65	48	12	48_12	B	20	35	43529	2	43546	1	21	2	1	1	0	0	0	0		1	0	0	0	Jan	Middle
B_35	13043	65	48	12	48_12	B	20	35	43529	3	43553	1	18	5	3	3	0	0	0	0		1	0	0	0	Jan	Middle
B_35	13044	65	48	12	48_12	B	20	35	43529	4	43560	1	19	6	1	1	0	0	0	0		1	0	0	0	Luisa	Middle
B_35	13045	65	48	12	48_12	B	20	35	43529	5	43567	1	20	7	3	3	0	0	0	0		1	0	0	0	Luisa	Middle
B_35	13046	65	48	12	48_12	B	20	35	43529	6	43574	1	18	6	5	5	0	0	0	0		1	0	0	0	Luisa	Middle
B_35	13047	65	48	12	48_12	B	20	35	43529	7	43581	1	20	5	4	4	0	0	0	0		1	0	0	0	Luisa	Middle
B_35	13048	65	48	12	48_12	B	20	35	43529	8	43588	1	20	9	5	3	2	0	0	0		1	0	0	0	Luisa	Middle
B_35	13049	65	48	12	48_12	B	20	35	43529	9	43595	1	21	8	8	8	0	0	0	0		1	0	0	0	Luisa	Middle
B_35	13050	65	48	12	48_12	B	20	35	43529	10	43602	1	22	7	12	12	0	0	0	0		1	0	0	0	Luisa	Middle
B_35	13051	65	48	12	48_12	B	20	35	43529	11	43609	1	26	5	17	17	0	0	0	0		1	0	0	0	Luisa	Middle
B_35	13052	65	48	12	48_12	B	20	35	43529	12	43616	1	25	4	14	14	0	0	0	0		1	0	0	0	Luisa	Middle
B_35	13053	65	48	12	48_12	B	20	35	43529	13	43623	1	29	3	10	10	0	0	0	0		1	0	0	0	Jan	Middle
B_35	13054	65	48	12	48_12	B	20	35	43529	14	43630	1	24	4	7	6	0	1	0	0		1	0	0	0	Luisa	Middle
B_35	13055	65	48	12	48_12	B	20	35	43529	15	43637	1	24	9	4	2	2	0	0	0		1	0	0	0	Luisa	Middle
B_35	13056	65	48	12	48_12	B	20	35	43529	16	43644	1	21	9	3	2	1	0	0	0		1	0	0	0	Luisa	Middle
B_35	13057	65	48	12	48_12	B	20	35	43529	17	43651	1	20	8	4	3	1	0	0	0		1	0	0	0	Luisa	Middle
B_35	13058	65	48	12	48_12	B	20	35	43529	18	43658	1	19	12	9	9	0	0	0	0		1	0	0	0	Luisa	Middle
B_35	13059	65	48	12	48_12	B	20	35	43529	19	43665	1	22	16	13	13	0	0	0	0		1	0	0	0	Luisa	Middle
B_35	13060	65	48	12	48_12	B	20	35	43529	20	43672	1	31	20	14	14	0	0	0	0		1	0	0	0	Luisa	Middle
B_35	13061	65	48	12	48_12	B	20	35	43529	21	43679	1	23	18	19	19	0	0	0	0		1	0	0	0	Luisa	Middle
B_35	13062	65	48	12	48_12	B	20	35	43529	22	43686	1	29	0	21	19	0	2	0	0				0	0	Luisa	Middle
B_35	13063	65	48	12	48_12	B	20	35	43529	23	43693	1	38	0	17	16	1	0	0	0				0	0	Luisa	Middle
B_35	13064	65	48	12	48_12	B	20	35	43529	24	43700	1	37	0	18	13	4	1	0	0				0	0	Luisa	Middle
B_35	13065	65	48	12	48_12	B	20	35	43529	25	43707	1	37	0	15	12	3	0	0	0				0	0	Luisa	Middle
B_35	13066	65	48	12	48_12	B	20	35	43529	26	43714	1	46	0	6	5	1	0	0	0				0	0	Luisa	Middle
B_39	8641	67	18	3	18_3	B	20	39	43656	1	43663	0	20	4	1	1	0	0	0	0		1	0	0	0	Luisa	Old
B_39	8642	67	18	3	18_3	B	20	39	43656	2	43670	1	15	6	0	0	0	0	0	4		1	0	0	0	Luisa	Old
B_39	8645	67	18	3	18_3	B	20	39	43656	5	43691	1	19	10	1	1	0	0	0	0		1	0	0	0	Luisa	Old
B_39	8646	67	18	3	18_3	B	20	39	43656	6	43698	1	19	9	2	2	0	0	0	0		1	0	0	0	Luisa	Old
B_39	8647	67	18	3	18_3	B	20	39	43656	7	43705	1	18	12	7	7	0	0	0	0		1	0	0	0	Luisa	Old
B_39	8644	67	18	3	18_3	B	20	39	43656	4	43684	1	18	7	1	1	0	0	0	0		1	0	0	0	Luisa	Old
B_39	8649	67	18	3	18_3	B	20	39	43656	9	43719	1	22	22	5	3	2	0	0	0		1	0	0	0	Lina	Old
B_39	8650	67	18	3	18_3	B	20	39	43656	10	43726	1	20	19	10	9	1	0	0	0		1	0	0	0	Luisa	Old
B_39	8651	67	18	3	18_3	B	20	39	43656	11	43733	1	18	22	13	13	0	0	0	0		1	0	0	0	Luisa	Old
B_39	8652	67	18	3	18_3	B	20	39	43656	12	43740	1	21	15	14	12	2	0	0	0		1	0	0	0	Luisa	Old
B_39	8653	67	18	3	18_3	B	20	39	43656	13	43747	1	22	16	13	12	1	0	0	0		1	0	0	0	Luisa	Old
B_39	8654	67	18	3	18_3	B	20	39	43656	14	43754	1	27	6	14	11	3	0	0	0		1	0	0	0	Luisa	Old
B_39	8655	67	18	3	18_3	B	20	39	43656	15	43761	1	24	7	7	6	1	0	0	0		1	0	0	0	Luisa	Old
B_39	8643	67	18	3	18_3	B	20	39	43656	3	43677	1	18	6	1	1	0	0	0	0		1	0	0	0	Luisa	Old
B_39	8657	67	18	3	18_3	B	20	39	43656	17	43775	1										1	0	0	0	Jan	Old
B_39	8658	67	18	3	18_3	B	20	39	43656	18	43782	1	24	19	2	2	0	0	0	0		1	0	0	0	Luisa	Old
B_39	8659	67	18	3	18_3	B	20	39	43656	19	43789	1	21	12	0	0	0	0	0	0		1	0	0	0	Luisa	Old
B_39	8660	67	18	3	18_3	B	20	39	43656	20	43796	1	19	19	5	2	3	0	0	0		1	0	0	0	Luisa	Old
B_39	8648	67	18	3	18_3	B	20	39	43656	8	43712	1	19	11	6	6	0	0	0	0		1	0	0	0	Luisa	Old
B_39	8662	67	18	3	18_3	B	20	39	43656	22	43810	1	20	16	9	8	1	0	0	0		1	0	0	0	Luisa	Old
B_39	8663	67	18	3	18_3	B	20	39	43656	23	43817	1	24	14	3	2	1	0	0	0		1	0	0	0	Luisa	Old
B_39	8664	67	18	3	18_3	B	20	39	43656	24	43822	1	22	16	8	7	1	0	0	0		1	0	0	0	Luisa	Old
B_39	8665	67	18	3	18_3	B	20	39	43656	25	43831	1								0				0	0	Luisa	Old
B_39	8666	67	18	3	18_3	B	20	39	43656	26	43838	1	20	0	14	6	7	1	0	0				0	0	Luisa	Old
B_39	8667	67	18	3	18_3	B	20	39	43656	27	43845	1	23	0	6	2	4	0	0	0				0	0	Luisa	Old
B_39	8668	67	18	3	18_3	B	20	39	43656	28	43852	1	22	0	3	2	1	0	0	0				0	0	Luisa	Old
B_39	8669	67	18	3	18_3	B	20	39	43656	29	43859	1	20	0	4	1	3	0	0	0				0	0	Luisa	Old
B_39	8656	67	18	3	18_3	B	20	39	43656	16	43768	1	21	12	7	7	0	0	0	0		1	0	0	0	Luisa	Old
B_39	8661	67	18	3	18_3	B	20	39	43656	21	43803	1	20	16	6	6	0	0	0	0		1	0	0	0	Luisa	Old
B_4	4482	61	34	8	34_8	B	20	4	43530	2	43544	0	21	0	3	3	0	0	0	0		1	0	0	0	Jan	Middle
B_4	4484	61	34	8	34_8	B	20	4	43530	4	43558	1	20	10	0	0	0	0	0	0		1	0	0	0	Luisa	Middle
B_4	4485	61	34	8	34_8	B	20	4	43530	5	43565	1	17	8	1	1	0	0	0	3		1	0	0	0	Luisa	Middle
B_4	4486	61	34	8	34_8	B	20	4	43530	6	43572	1	19	12	5	5	0	0	0	0		1	0	0	0	Luisa	Middle
B_4	4483	61	34	8	34_8	B	20	4	43530	3	43551	1	25	6	1	1	0	0	0	0		1	0	0	0	Jan	Middle
B_4	4488	61	34	8	34_8	B	20	4	43530	8	43586	1	20	20	13	13	0	0	0	0		1	0	0	0	Luisa	Middle
B_4	4489	61	34	8	34_8	B	20	4	43530	9	43593	1	25	16	20	20	0	0	0	0		1	0	0	0	Luisa	Middle
B_4	4490	61	34	8	34_8	B	20	4	43530	10	43600	1	35	37	24	23	0	1	0	0		1	0	0	0	Luisa	Middle
B_4	4491	61	34	8	34_8	B	20	4	43530	11	43607	1	33	20	35	30	4	1	0	0		1	0	0	0	Luisa	Middle
B_4	4492	61	34	8	34_8	B	20	4	43530	12	43614	1	27	12	43	37	6	0	0	0		1	0	0	0	Luisa	Middle
B_4	4493	61	34	8	34_8	B	20	4	43530	13	43621	1	37	11	48	40	7	1	0	0		1	0	0	0	Jan	Middle
B_4	4481	61	34	8	34_8	B	20	4	43530	1	43537	0	20	0	4	4	0	0	0	0		1	0	0	0	Jan	Middle
B_4	4495	61	34	8	34_8	B	20	4	43530	15	43635	1	46	8	21	21	0	0	0	0		1	0	0	0	Luisa	Middle
B_4	4496	61	34	8	34_8	B	20	4	43530	16	43642	1	33	7	14	10	3	1	0	0		1	0	0	0	Luisa	Middle
B_4	4497	61	34	8	34_8	B	20	4	43530	17	43649	1	27	5	12	10	2	0	0	0		1	0	0	0	Luisa	Middle
B_4	4498	61	34	8	34_8	B	20	4	43530	18	43656	1	22	5	12	11	1	0	0	0		1	0	0	0	Luisa	Middle
B_4	4499	61	34	8	34_8	B	20	4	43530	19	43663	1	27	6	7	7	0	0	0	0		1	0	0	0	Luisa	Middle
B_4	4500	61	34	8	34_8	B	20	4	43530	20	43670	1	25	5	6	6	0	0	0	0		1	0	0	0	Luisa	Middle
B_4	4501	61	34	8	34_8	B	20	4	43530	21	43677	1	24	8	3	3	0	0	0	0		1	0	0	0	Luisa	Middle
B_4	4502	61	34	8	34_8	B	20	4	43530	22	43684	1	20	3	4	3	1	0	0	0				0	0	Luisa	Middle
B_4	4503	61	34	8	34_8	B	20	4	43530	23	43691	1	20	0	7	7	0	0	0	0				0	0	Luisa	Middle
B_4	4504	61	34	8	34_8	B	20	4	43530	24	43698	1	24	0	9	8	1	0	0	0				0	0	Luisa	Middle
B_4	4505	61	34	8	34_8	B	20	4	43530	25	43705	1	30	0	9	8	1	0	0	0				0	0	Luisa	Middle
B_4	4506	61	34	8	34_8	B	20	4	43530	26	43712	1	30	0	7	5	2	0	0	0				0	0	Luisa	Middle
B_4	4494	61	34	8	34_8	B	20	4	43530	14	43628	1	36	9	49	38	11	0	0	0		1	0	0	0	Luisa	Middle
B_4	4487	61	34	8	34_8	B	20	4	43530	7	43579	1	18	14	8	8	0	0	0	0		1	0	0	0	Luisa	Middle
B_8	2162	58	18	8	18_8	B	20	8	43556	2	43570	1	16	5	0	0	0	0	0	4		1	0	0	0	Luisa	Old
B_8	2164	58	18	8	18_8	B	20	8	43556	4	43584	1	19	5	0	0	0	0	0	0		1	0	0	0	Luisa	Old
B_8	2161	58	18	8	18_8	B	20	8	43556	1	43563	1	18	0	0	0	0	0	0	0		1	0	0	0	Luisa	Old
B_8	2166	58	18	8	18_8	B	20	8	43556	6	43598	1	18	10	0	0	0	0	0	2		1	0	0	0	Luisa	Old
B_8	2163	58	18	8	18_8	B	20	8	43556	3	43577	1	20	10	0	0	0	0	0	0		1	0	0	0	Luisa	Old
B_8	2168	58	18	8	18_8	B	20	8	43556	8	43612	1	20	8	0	0	0	0	0	0		1	0	0	0	Julia	Old
B_8	2169	58	18	8	18_8	B	20	8	43556	9	43619	1	21	11	2	2	0	0	0	0		1	0	0	0	Julia	Old
B_8	2170	58	18	8	18_8	B	20	8	43556	10	43626	1	16	10	4	4	0	0	0	3		1	0	0	0	Luisa	Old
B_8	2167	58	18	8	18_8	B	20	8	43556	7	43605	1	18	9	0	0	0	0	0	2		1	0	0	0	Luisa	Old
B_8	2172	58	18	8	18_8	B	20	8	43556	12	43640	1	21	8	6	6	0	0	0	0		1	0	0	0	Luisa	Old
B_8	2173	58	18	8	18_8	B	20	8	43556	13	43647	1	21	10	10	9	0	1	0	0		1	0	0	0	Luisa	Old
B_8	2174	58	18	8	18_8	B	20	8	43556	14	43654	1	23	8	10	10	0	0	0	0		1	0	0	0	Luisa	Old
B_8	2175	58	18	8	18_8	B	20	8	43556	15	43661	1	24	9	7	7	0	0	0	0		1	0	0	0	Luisa	Old
B_8	2176	58	18	8	18_8	B	20	8	43556	16	43668	1	21	8	5	5	0	0	0	0		1	0	0	0	Luisa	Old
B_8	2177	58	18	8	18_8	B	20	8	43556	17	43675	1	21	10	7	7	0	0	0	0		1	0	0	0	Luisa	Old
B_8	2165	58	18	8	18_8	B	20	8	43556	5	43591	1	19	8	0	0	0	0	0	0		1	0	0	0	Luisa	Old
B_8	2179	58	18	8	18_8	B	20	8	43556	19	43689	1	22	14	7	6	0	1	0	0		1	0	0	0	Luisa	Old
B_8	2180	58	18	8	18_8	B	20	8	43556	20	43696	1	21	12	6	6	0	0	0	0		1	0	0	0	Luisa	Old
B_8	2181	58	18	8	18_8	B	20	8	43556	21	43703	1	26	18	6	6	0	0	0	0		1	0	0	0	Luisa	Old
B_8	2182	58	18	8	18_8	B	20	8	43556	22	43710	1	19	7	7	7	0	0	0	0		1	0	0	0	Luisa	Old
B_8	2183	58	18	8	18_8	B	20	8	43556	23	43717	1	20	8	7	7	0	0	0	0		1	0	0	0	Luisa	Old
B_8	2171	58	18	8	18_8	B	20	8	43556	11	43633	1	19	4	4	3	1	0	0	0		1	0	0	0	Luisa	Old
B_8	2185	58	18	8	18_8	B	20	8	43556	25	43731	1	21	11	7	7	0	0	0	0		1	0	0	0	Luisa	Old
B_8	2186	58	18	8	18_8	B	20	8	43556	26	43738	1	25	7	8	6	1	1	0	0		1	0	0	0	Luisa	Old
B_8	2187	58	18	8	18_8	B	20	8	43556	27	43745	1	23	6	6	6	0	0	0	0		1	0	0	0	Luisa	Old
B_8	2188	58	18	8	18_8	B	20	8	43556	28	43752	1	21	13	8	6	2	0	0	0		1	0	0	0	Luisa	Old
B_8	2189	58	18	8	18_8	B	20	8	43556	29	43759	1	24	10	11	7	4	0	0	0		1	0	0	0	Luisa	Old
B_8	2190	58	18	8	18_8	B	20	8	43556	30	43766	1	17	9	8	7	1	0	0	0		1	0	0	0	Luisa	Old
B_8	2178	58	18	8	18_8	B	20	8	43556	18	43682	1	22	9	7	6	1	0	0	0		1	0	0	0	Luisa	Old
B_8	2192	58	18	8	18_8	B	20	8	43556	32	43780	1	20	5	11	2	9	0	0	0		1	0	0	0	Luisa	Old
B_8	2193	58	18	8	18_8	B	20	8	43556	33	43787	1	23	3	3	1	2	0	0	0		1	0	0	0	Luisa	Old
B_8	2194	58	18	8	18_8	B	20	8	43556	34	43794	1	19	0	7	0	6	1	0	0				0	0	Luisa	Old
B_8	2195	58	18	8	18_8	B	20	8	43556	35	43801	1	17	0	5	0	5	0	0	0				0	0	Luisa	Old
B_8	2196	58	18	8	18_8	B	20	8	43556	36	43808	1	15	0	1	0	1	0	0	0				0	0	Luisa	Old
B_8	2184	58	18	8	18_8	B	20	8	43556	24	43724	1	23	8	12	12	0	0	0	0		1	0	0	0	Luisa	Old
B_8	2197	58	18	8	18_8	B	20	8	43556	37	43815	1	13	0	2	0	2	0	0	0				0	0	Luisa	Old
B_8	2191	58	18	8	18_8	B	20	8	43556	31	43773	1	25	9	6	3	3	0	0	0		1	0	0	0	Jan	Old
C_13	9201	63	41	4	41_4	C	10	13	43503	1	43511	0	9	1	3	3	0	0	0	1		1	0	0	0	Luisa	Old
C_13	9202	63	41	4	41_4	C	10	13	43503	2	43518	0	10	3	6	6	0	0	0	0		1	0	0	0	Luisa	Old
C_13	9204	63	41	4	41_4	C	10	13	43503	4	43532	0	13	4	2	2	0	0	0	0		1	0	0	0	Jan	Old
C_13	9205	63	41	4	41_4	C	10	13	43503	5	43539	0	12	5	2	2	0	0	0	0		1	0	0	0	Jan	Old
C_13	9206	63	41	4	41_4	C	10	13	43503	6	43546	0	11	6	6	6	0	0	0	0		1	0	0	0	Jan	Old
C_13	9203	63	41	4	41_4	C	10	13	43503	3	43525	0	11	4	4	4	0	0	0	0		1	0	0	0	Jan	Old
C_13	9208	63	41	4	41_4	C	10	13	43503	8	43560	0	15	6	8	8	0	0	0	0		1	0	0	0	Luisa	Old
C_13	9209	63	41	4	41_4	C	10	13	43503	9	43567		14	11	8	8	0	0	0	0		1	0	0	0	Luisa	Old
C_13	9210	63	41	4	41_4	C	10	13	43503	10	43574	1	15	11	10	10	0	0	0	0		1	0	0	0	Luisa	Old
C_13	9211	63	41	4	41_4	C	10	13	43503	11	43581	1	15	14	11	11	0	0	0	0		1	0	0	0	Luisa	Old
C_13	9212	63	41	4	41_4	C	10	13	43503	12	43588	1	17	13	8	8	0	0	0	0		1	0	0	0	Luisa	Old
C_13	9213	63	41	4	41_4	C	10	13	43503	13	43595	1	14	10	11	11	0	0	0	0		1	0	0	0	Luisa	Old
C_13	9214	63	41	4	41_4	C	10	13	43503	14	43602	1	14	19	20	19	0	1	0	0		1	0	0	0	Luisa	Old
C_13	9215	63	41	4	41_4	C	10	13	43503	15	43609	1	19	14	26	25	0	1	0	0		1	0	0	0	Luisa	Old
C_13	9216	63	41	4	41_4	C	10	13	43503	16	43616	1	27	19	23	19	3	1	0	0		1	0	0	0	Luisa	Old
C_13	9217	63	41	4	41_4	C	10	13	43503	17	43623	1	17	14	30	27	3	0	0	0		1	0	0	0	Jan	Old
C_13	9218	63	41	4	41_4	C	10	13	43503	18	43630	1	24	21	37	27	8	2	0	0		1	0	0	0	Luisa	Old
C_13	9219	63	41	4	41_4	C	10	13	43503	19	43637	1	20	23	32	28	4	0	0	0		1	0	0	0	Luisa	Old
C_13	9220	63	41	4	41_4	C	10	13	43503	20	43644	1	22	24	30	30	0	0	0	0		1	0	0	0	Luisa	Old
C_13	9221	63	41	4	41_4	C	10	13	43503	21	43651	1	23	32	32	27	5	0	0	0		1	0	0	0	Luisa	Old
C_13	9222	63	41	4	41_4	C	10	13	43503	22	43658	1	26	17	34	22	12	0	0	0		1	0	0	0	Luisa	Old
C_13	9223	63	41	4	41_4	C	10	13	43503	23	43665	1	22	29	31	25	6	0	0	0		1	0	0	0	Luisa	Old
C_13	9224	63	41	4	41_4	C	10	13	43503	24	43672	1	25	24	41	34	5	2	0	0		1	0	0	0	Luisa	Old
C_13	9225	63	41	4	41_4	C	10	13	43503	25	43679	1	19	19	49	44	5	0	0	0		1	0	0	0	Luisa	Old
C_13	9226	63	41	4	41_4	C	10	13	43503	26	43686	1	41	29	47	42	4	1	0	0		1	0	0	0	Luisa	Old
C_13	9227	63	41	4	41_4	C	10	13	43503	27	43693	1	30	29	52	47	5	0	0	0		1	0	0	0	Luisa	Old
C_13	9228	63	41	4	41_4	C	10	13	43503	28	43700	1	32	25	46	37	7	2	0	0		1	0	0	0	Luisa	Old
C_13	9229	63	41	4	41_4	C	10	13	43503	29	43707	1	38	16	51	44	7	0	0	0		1	0	0	0	Luisa	Old
C_13	9230	63	41	4	41_4	C	10	13	43503	30	43714	1	31	20	59	47	10	2	0	0		1	0	0	0	Luisa	Old
C_13	9231	63	41	4	41_4	C	10	13	43503	31	43721	1	40	24	47	39	7	1	0	0		1	0	0	0	Luisa	Old
C_13	9232	63	41	4	41_4	C	10	13	43503	32	43728	1	24	19	59	51	8	0	0	0		1	0	0	0	Jan	Old
C_13	9233	63	41	4	41_4	C	10	13	43503	33	43735	1	35	15	17	0	15	2	0	0		1	0	0	0	Luisa	Old
C_13	9234	63	41	4	41_4	C	10	13	43503	34	43742	1	34	20	31	7	23	1	0	0		1	0	0	0	Luisa	Old
C_13	9235	63	41	4	41_4	C	10	13	43503	35	43749	1	13	24	33	23	9	1	0	0		1	0	0	0	Luisa	Old
C_13	9236	63	41	4	41_4	C	10	13	43503	36	43756	1	24	17	35	29	6	0	0	0		1	0	0	0	Luisa	Old
C_13	9237	63	41	4	41_4	C	10	13	43503	37	43763	1	25	28	41	34	4	3	0	0		1	0	0	0	Luisa	Old
C_13	9238	63	41	4	41_4	C	10	13	43503	38	43770	1	23	26	31	28	3	0	0	0		1	0	0	0	Luisa	Old
C_13	9239	63	41	4	41_4	C	10	13	43503	39	43777	1	37	16	30	26	4	0	0	0		1	0	0	0	Jan	Old
C_13	9240	63	41	4	41_4	C	10	13	43503	40	43784	1	20	27	38	37	0	1	0	0		1	0	0	0	Luisa	Old
C_13	9241	63	41	4	41_4	C	10	13	43503	41	43791	1	30	14	35	27	6	2	0	0		1	0	0	0	Luisa	Old
C_13	9242	63	41	4	41_4	C	10	13	43503	42	43798	1	30	14	35	27	6	2	0	0				0	0	Luisa	Old
C_13	9243	63	41	4	41_4	C	10	13	43503	43	43805	1	38	0	39	32	3	4	0	0				0	0	Luisa	Old
C_13	9244	63	41	4	41_4	C	10	13	43503	44	43812	1	46	0	35	29	6	0	0	0				0	0	Luisa	Old
C_13	9245	63	41	4	41_4	C	10	13	43503	45	43819	1	49	0	20	18	2	0	0	0				0	0	Luisa	Old
C_13	9246	63	41	4	41_4	C	10	13	43503	46	43822	1	61	0	24	24	0	0	0	0				0	0	Luisa	Old
C_13	9207	63	41	4	41_4	C	10	13	43503	7	43553	0	13	4	8	8	0	0	0	0		1	0	0	0	Jan	Old
C_13	9248	63	41	4	41_4	C	10	13	43503	48	43840	1	34	0	1	0	1	0	0	0				0	0	Luisa	Old
C_13	9247	63	41	4	41_4	C	10	13	43503	47	43833	1								0				0	0	Luisa	Old
C_14	7282	60	34	11	34_11	C	10	14	43530	2	43544	1	10	6	6	6	0	0	0	0		1	0	0	0	Jan	Middle
C_14	7283	60	34	11	34_11	C	10	14	43530	3	43551	1	14	8	2	2	0	0	0	0		1	0	0	0	Jan	Middle
C_14	7284	60	34	11	34_11	C	10	14	43530	4	43558	1	12	9	0	0	0	0	0	0		1	0	0	0	Luisa	Middle
C_14	7286	60	34	11	34_11	C	10	14	43530	6	43572	1	10	11	2	2	0	0	0	0		1	0	0	0	Luisa	Middle
C_14	7287	60	34	11	34_11	C	10	14	43530	7	43579	1	10	10	3	3	0	0	0	0		1	0	0	0	Luisa	Middle
C_14	7288	60	34	11	34_11	C	10	14	43530	8	43586	1	10	7	5	5	0	0	0	0		1	0	0	0	Luisa	Middle
C_14	7289	60	34	11	34_11	C	10	14	43530	9	43593	1	9	13	9	9	0	0	0	0		1	0	0	0	Luisa	Middle
C_14	7290	60	34	11	34_11	C	10	14	43530	10	43600	1	13	11	12	12	0	0	0	0		1	0	0	0	Luisa	Middle
C_14	7291	60	34	11	34_11	C	10	14	43530	11	43607	1	11	28	14	14	0	0	0	0		1	0	0	0	Luisa	Middle
C_14	7292	60	34	11	34_11	C	10	14	43530	12	43614	1	20	18	7	5	2	0	0	0		1	0	0	0	Luisa	Middle
C_14	7293	60	34	11	34_11	C	10	14	43530	13	43621	1	15	11	10	8	2	0	0	0		1	0	0	0	Jan	Middle
C_14	7281	60	34	11	34_11	C	10	14	43530	1	43537	0	7	0	4	4	0	0	0	3		1	0	0	0	Jan	Middle
C_14	7295	60	34	11	34_11	C	10	14	43530	15	43635	1	17	28	29	25	0	4	0	0		1	0	0	0	Luisa	Middle
C_14	7296	60	34	11	34_11	C	10	14	43530	16	43642	1	30	32	21	21	0	0	0	0		1	0	0	0	Luisa	Middle
C_14	7297	60	34	11	34_11	C	10	14	43530	17	43649	1	19	36	30	26	4	0	0	0		1	0	0	0	Luisa	Middle
C_14	7298	60	34	11	34_11	C	10	14	43530	18	43656	1	21	41	38	36	1	1	0	0		1	0	0	0	Luisa	Middle
C_14	7299	60	34	11	34_11	C	10	14	43530	19	43663	1	22	40	34	34	0	0	0	0		1	0	0	0	Luisa	Middle
C_14	7300	60	34	11	34_11	C	10	14	43530	20	43670	1	27	30	32	29	3	0	0	0		1	0	0	0	Luisa	Middle
C_14	7301	60	34	11	34_11	C	10	14	43530	21	43677	1	24	24	33	26	7	0	0	0		1	0	0	0	Luisa	Middle
C_14	7302	60	34	11	34_11	C	10	14	43530	22	43684	1	19	7	30	27	3	0	0	0				0	0	Luisa	Middle
C_14	7303	60	34	11	34_11	C	10	14	43530	23	43691	1	28	0	31	30	1	0	0	0				0	0	Luisa	Middle
C_14	7304	60	34	11	34_11	C	10	14	43530	24	43698	1	40	0	33	31	1	1	0	0				0	0	Luisa	Middle
C_14	7305	60	34	11	34_11	C	10	14	43530	25	43705	1	58	0	38	33	5	0	0	0				0	0	Luisa	Middle
C_14	7306	60	34	11	34_11	C	10	14	43530	26	43712	1	59	0	22	22	0	0	0	0				0	0	Luisa	Middle
C_14	7294	60	34	11	34_11	C	10	14	43530	14	43628	1	13	24	31	25	6	0	0	0		1	0	0	0	Luisa	Middle
C_14	7285	60	34	11	34_11	C	10	14	43530	5	43565	1	9	6	0	0	0	0	0	0		1	0	0	0	Luisa	Middle
C_16	3761	66	41	8	41_8	C	10	16	43574	1	43584	1	11	5	2	2	0	0	0	0		1	0	0	0	Luisa	Old
C_16	3762	66	41	8	41_8	C	10	16	43574	2	43591	1	10	7	5	5	0	0	0	0		1	0	0	0	Luisa	Old
C_16	3765	66	41	8	41_8	C	10	16	43574	5	43612	1	10	14	4	4	0	0	0	0		1	0	0	0	Jan	Old
C_16	3766	66	41	8	41_8	C	10	16	43574	6	43619	1	9	11	10	10	0	0	0	0		1	0	0	0	Jan	Old
C_16	3763	66	41	8	41_8	C	10	16	43574	3	43598	1	13	6	2	2	0	0	0	0		1	0	0	0	Luisa	Old
C_16	3764	66	41	8	41_8	C	10	16	43574	4	43605	1	12	8	0	0	0	0	0	0		1	0	0	0	Luisa	Old
C_16	3769	66	41	8	41_8	C	10	16	43574	9	43640	1	18	12	20	15	4	1	0	0		1	0	0	0	Luisa	Old
C_16	3770	66	41	8	41_8	C	10	16	43574	10	43647	1	16	6	20	19	1	0	0	0		1	0	0	0	Luisa	Old
C_16	3771	66	41	8	41_8	C	10	16	43574	11	43654	1	18	3	30	26	3	1	0	0		1	0	0	0	Luisa	Old
C_16	3768	66	41	8	41_8	C	10	16	43574	8	43633	1	13	20	13	12	0	1	0	0		1	0	0	0	Luisa	Old
C_16	3773	66	41	8	41_8	C	10	16	43574	13	43668	1	29	5	13	13	0	0	0	0		1	0	0	0	Luisa	Old
C_16	3774	66	41	8	41_8	C	10	16	43574	14	43675	1	17	5	9	7	2	0	0	0		1	0	0	0	Luisa	Old
C_16	3775	66	41	8	41_8	C	10	16	43574	15	43682	1	15	7	8	5	2	1	0	0		1	0	0	0	Luisa	Old
C_16	3776	66	41	8	41_8	C	10	16	43574	16	43689	1	13	8	5	5	0	0	0	0		1	0	0	0	Luisa	Old
C_16	3777	66	41	8	41_8	C	10	16	43574	17	43696	1	14	18	7	6	0	1	0	0		1	0	0	0	Luisa	Old
C_16	3778	66	41	8	41_8	C	10	16	43574	18	43703	1	13	14	10	8	0	2	0	0		1	0	0	0	Luisa	Old
C_16	3779	66	41	8	41_8	C	10	16	43574	19	43710	1	13	11	10	9	1	0	0	0		1	0	0	0	Luisa	Old
C_16	3767	66	41	8	41_8	C	10	16	43574	7	43626	1	15	19	9	0	0	0	0	0		1	0	0	0	Luisa	Old
C_16	3781	66	41	8	41_8	C	10	16	43574	21	43724	1	16	10	26	26	0	0	0	0		1	0	0	0	Luisa	Old
C_16	3782	66	41	8	41_8	C	10	16	43574	22	43731	1	23	12	22	20	1	1	0	0		1	0	0	0	Luisa	Old
C_16	3783	66	41	8	41_8	C	10	16	43574	23	43738	1	24	10	16	13	1	2	0	0		1	0	0	0	Luisa	Old
C_16	3784	66	41	8	41_8	C	10	16	43574	24	43745	1	20	13	13	10	3	0	0	0		1	0	0	0	Luisa	Old
C_16	3772	66	41	8	41_8	C	10	16	43574	12	43661	1	21	2	30	27	3	0	0	0		1	0	0	0	Luisa	Old
C_16	3786	66	41	8	41_8	C	10	16	43574	26	43759	1	14	9	16	14	2	0	0	0		1	0	0	0	Luisa	Old
C_16	3787	66	41	8	41_8	C	10	16	43574	27	43766	1	18	16	17	14	1	2	0	0		1	0	0	0	Luisa	Old
C_16	3788	66	41	8	41_8	C	10	16	43574	28	43773	1	21	16	14	13	1	0	0	0		1	0	0	0	Jan	Old
C_16	3789	66	41	8	41_8	C	10	16	43574	29	43780	1	15	11	17	14	2	1	0	0		1	0	0	0	Luisa	Old
C_16	3790	66	41	8	41_8	C	10	16	43574	30	43787	1	17	20	18	15	2	1	0	0		1	0	0	0	Luisa	Old
C_16	3791	66	41	8	41_8	C	10	16	43574	31	43794	1	19	14	26	19	7	0	0	0		1	0	0	0	Luisa	Old
C_16	3792	66	41	8	41_8	C	10	16	43574	32	43801	1	17	17	17	13	3	1	0	0		1	0	0	0	Luisa	Old
C_16	3780	66	41	8	41_8	C	10	16	43574	20	43717	1	14	11	19	19	0	0	0	0		1	0	0	0	Luisa	Old
C_16	3794	66	41	8	41_8	C	10	16	43574	34	43815	1	23	8	0	0	17	1	0	0		1	0	0	0	Luisa	Old
C_16	3795	66	41	8	41_8	C	10	16	43574	35	43822	1	12	2	10	1	9	0	0	0				0	0	Luisa	Old
C_16	3796	66	41	8	41_8	C	10	16	43574	36	43829	1								0				0	0	Luisa	Old
C_16	3797	66	41	8	41_8	C	10	16	43574	37	43836	1	14	0	22	7	13	2	0	0				0	0	Luisa	Old
C_16	3785	66	41	8	41_8	C	10	16	43574	25	43752	1	17	16	17	12	4	1	0	0		1	0	0	0	Luisa	Old
C_16	3799	66	41	8	41_8	C	10	16	43574	39	43850	1	16	0	2	1	1	0	0	0				0	0	Luisa	Old
C_16	3798	66	41	8	41_8	C	10	16	43574	38	43843	1	17	0	7	2	4	1	0	0				0	0	Luisa	Old
C_16	3793	66	41	8	41_8	C	10	16	43574	33	43808	1	18	14	13	5	8	0	0	0		1	0	0	0	Luisa	Old
C_24	11361	64	48	1	48_1	C	10	24	43615	1	43623	0	14	0	1	1	0	0	0	0		1	0	0	0	Jan	Old
C_24	11362	64	48	1	48_1	C	10	24	43615	2	43630	0	14	3	2	2	0	0	0	0		1	0	0	0	Luisa	Old
C_24	11364	64	48	1	48_1	C	10	24	43615	4	43644		13	8	0	0	0	0	0	0		1	0	0	0	Luisa	Old
C_24	11365	64	48	1	48_1	C	10	24	43615	5	43651		9	6	1	1	0	0	0	1		1	0	0	0	Luisa	Old
C_24	11366	64	48	1	48_1	C	10	24	43615	6	43658		10	7	6	6	0	0	0	0		1	0	0	0	Luisa	Old
C_24	11367	64	48	1	48_1	C	10	24	43615	7	43665		10	13	10	10	0	0	0	0		1	0	0	0	Luisa	Old
C_24	11368	64	48	1	48_1	C	10	24	43615	8	43672		15	17	11	11	0	0	0	0		1	0	0	0	Luisa	Old
C_24	11369	64	48	1	48_1	C	10	24	43615	9	43679		14	14	15	15	0	0	0	0		1	0	0	0	Luisa	Old
C_24	11370	64	48	1	48_1	C	10	24	43615	10	43686		18	27	24	24	0	0	0	0		1	0	0	0	Luisa	Old
C_24	11371	64	48	1	48_1	C	10	24	43615	11	43693		17	8	21	17	2	2	0	0		1	0	0	0	Luisa	Old
C_24	11372	64	48	1	48_1	C	10	24	43615	12	43700		25	7	30	25	4	1	0	0		1	0	0	0	Luisa	Old
C_24	11373	64	48	1	48_1	C	10	24	43615	13	43707		18	6	38	30	8	0	0	0		1	0	0	0	Luisa	Old
C_24	11374	64	48	1	48_1	C	10	24	43615	14	43714		26	4	35	29	5	1	0	0		1	0	0	0	Luisa	Old
C_24	11375	64	48	1	48_1	C	10	24	43615	15	43721		46	5	18	13	3	2	0	0		1	0	0	0	Luisa	Old
C_24	11363	64	48	1	48_1	C	10	24	43615	3	43637		13	8	0	0	0	0	0	0		1	0	0	0	Luisa	Old
C_24	11377	64	48	1	48_1	C	10	24	43615	17	43735		15	10	11	10	0	1	0	0		1	0	0	0	Luisa	Old
C_24	11378	64	48	1	48_1	C	10	24	43615	18	43742		15	11	8	8	0	0	0	0		1	0	0	0	Luisa	Old
C_24	11379	64	48	1	48_1	C	10	24	43615	19	43749		16	21	6	6	0	0	0	0		1	0	0	0	Luisa	Old
C_24	11380	64	48	1	48_1	C	10	24	43615	20	43756		12	21	10	9	1	0	0	0		1	0	0	0	Luisa	Old
C_24	11381	64	48	1	48_1	C	10	24	43615	21	43763		13	18	14	14	0	0	0	0		1	0	0	0	Luisa	Old
C_24	11382	64	48	1	48_1	C	10	24	43615	22	43770		15	13	15	15	0	0	0	0		1	0	0	0	Luisa	Old
C_24	11383	64	48	1	48_1	C	10	24	43615	23	43777		19	19	14	14	0	0	0	0		1	0	0	0	Jan	Old
C_24	11384	64	48	1	48_1	C	10	24	43615	24	43784		14	22	10	10	0	0	0	0		1	0	0	0	Luisa	Old
C_24	11385	64	48	1	48_1	C	10	24	43615	25	43791		17	19	7	7	0	0	0	0		1	0	0	0	Luisa	Old
C_24	11386	64	48	1	48_1	C	10	24	43615	26	43798		11	14	7	3	0	0	0	0		1	0	0	0	Luisa	Old
C_24	11387	64	48	1	48_1	C	10	24	43615	27	43805		15	13	2	1	0	1	0	0		1	0	0	0	Luisa	Old
C_24	11388	64	48	1	48_1	C	10	24	43615	28	43812		10	2	0	0	0	0	0	0		1	0	0	0	Luisa	Old
C_24	11389	64	48	1	48_1	C	10	24	43615	29	43819		9	0	0	0	0	0	0	0				0	0	Luisa	Old
C_24	11390	64	48	1	48_1	C	10	24	43615	30	43826		9	0	1	0	1	0	0	0				0	0	Luisa	Old
C_24	11376	64	48	1	48_1	C	10	24	43615	16	43728		14	8	14	11	3	0	0	0		1	0	0	0	Jan	Old
C_27	11122	64	48	9	48_9	C	10	27	43532	2	43546	1	10	6	2	2	0	0	0	0		1	0	0	0	Jan	Middle
C_27	11123	64	48	9	48_9	C	10	27	43532	3	43553	1	11	7	2	2	0	0	0	0		1	0	0	0	Jan	Middle
C_27	11124	64	48	9	48_9	C	10	27	43532	4	43560	1	10	6	0	0	0	0	0	0		1	0	0	0	Luisa	Middle
C_27	11125	64	48	9	48_9	C	10	27	43532	5	43567	1	6	8	0	0	0	0	0	4		1	0	0	0	Luisa	Middle
C_27	11126	64	48	9	48_9	C	10	27	43532	6	43574	1	7	9	5	5	0	0	0	3		1	0	0	0	Luisa	Middle
C_27	11127	64	48	9	48_9	C	10	27	43532	7	43581	1	7	6	8	8	0	0	0	3		1	0	0	0	Luisa	Middle
C_27	11128	64	48	9	48_9	C	10	27	43532	8	43588	1	13	4	2	2	0	0	0	0		1	0	0	0	Luisa	Middle
C_27	11129	64	48	9	48_9	C	10	27	43532	9	43595	1	10	10	1	1	0	0	0	0		1	0	0	0	Luisa	Middle
C_27	11130	64	48	9	48_9	C	10	27	43532	10	43602	1	9	13	4	3	1	0	0	0		1	0	0	0	Luisa	Middle
C_27	11131	64	48	9	48_9	C	10	27	43532	11	43609	1	12	20	3	3	0	0	0	0		1	0	0	0	Luisa	Middle
C_27	11132	64	48	9	48_9	C	10	27	43532	12	43616	1	11	12	5	5	0	0	0	0		1	0	0	0	Luisa	Middle
C_27	11133	64	48	9	48_9	C	10	27	43532	13	43623	1	10	19	10	10	0	0	0	0		1	0	0	0	Jan	Middle
C_27	11134	64	48	9	48_9	C	10	27	43532	14	43630	1	13	22	16	16	0	0	0	0		1	0	0	0	Luisa	Middle
C_27	11135	64	48	9	48_9	C	10	27	43532	15	43637	1	14	15	19	18	0	1	0	0		1	0	0	0	Luisa	Middle
C_27	11136	64	48	9	48_9	C	10	27	43532	16	43644	1	16	14	20	19	0	1	0	0		1	0	0	0	Luisa	Middle
C_27	11137	64	48	9	48_9	C	10	27	43532	17	43651	1	22	29	22	19	3	0	0	0		1	0	0	0	Luisa	Middle
C_27	11138	64	48	9	48_9	C	10	27	43532	18	43658	1	19	16	20	18	2	0	0	0		1	0	0	0	Luisa	Middle
C_27	11139	64	48	9	48_9	C	10	27	43532	19	43665	1	25	22	16	15	0	1	0	0		1	0	0	0	Luisa	Middle
C_27	11140	64	48	9	48_9	C	10	27	43532	20	43672	1	12	7	18	14	2	2	0	0		1	0	0	0	Luisa	Middle
C_27	11141	64	48	9	48_9	C	10	27	43532	21	43679	1	18	23	24	22	2	0	0	0		1	0	0	0	Luisa	Middle
C_27	11142	64	48	9	48_9	C	10	27	43532	22	43686	1	24	13	13	12	1	0	0	0				0	0	Luisa	Middle
C_27	11143	64	48	9	48_9	C	10	27	43532	23	43693	1	32	0	26	26	0	0	0	0				0	0	Luisa	Middle
C_27	11144	64	48	9	48_9	C	10	27	43532	24	43700	1	45	0	20	18	1	1	0	0				0	0	Luisa	Middle
C_27	11145	64	48	9	48_9	C	10	27	43532	25	43707	1	45	0	21	21	0	0	0	0				0	0	Luisa	Middle
C_27	11121	64	48	9	48_9	C	10	27	43532	1	43539	0	10	0	2	2	0	0	0	0		1	0	0	0	Jan	Middle
C_29	8962	63	41	10	41_10	C	10	29	43532	2	43546	0	8	0	2	2	0	0	0	1		1	0	0	0	Jan	Middle
C_29	8964	63	41	10	41_10	C	10	29	43532	4	43560	1	10	5	1	1	0	0	0	0		1	0	0	0	Luisa	Middle
C_29	8961	63	41	10	41_10	C	10	29	43532	1	43539	0	10	0	1	1	0	0	0	0		1	0	0	0	Jan	Middle
C_29	8966	63	41	10	41_10	C	10	29	43532	6	43574	1	10	4	4	4	0	0	0	0		1	0	0	0	Luisa	Middle
C_29	8963	63	41	10	41_10	C	10	29	43532	3	43553	1	9	5	2	2	0	0	0	0		1	0	0	0	Jan	Middle
C_29	8968	63	41	10	41_10	C	10	29	43532	8	43588	1	14	8	8	8	0	0	0	0		1	0	0	0	Luisa	Middle
C_29	8965	63	41	10	41_10	C	10	29	43532	5	43567	1	10	7	0	0	0	0	0	0		1	0	0	0	Luisa	Middle
C_29	8970	63	41	10	41_10	C	10	29	43532	10	43602	1	13	6	11	11	0	0	0	0		1	0	0	0	Luisa	Middle
C_29	8971	63	41	10	41_10	C	10	29	43532	11	43609	1	15	6	11	11	0	0	0	0		1	0	0	0	Luisa	Middle
C_29	8972	63	41	10	41_10	C	10	29	43532	12	43616	1	17	5	12	9	3	0	0	0		1	0	0	0	Luisa	Middle
C_29	8969	63	41	10	41_10	C	10	29	43532	9	43595	1	15	5	8	8	0	0	0	0		1	0	0	0	Luisa	Middle
C_29	8974	63	41	10	41_10	C	10	29	43532	14	43630	1	13	5	7	7	0	0	0	0		1	0	0	0	Luisa	Middle
C_29	8975	63	41	10	41_10	C	10	29	43532	15	43637	1	12	8	7	1	0	0	0	0		1	0	0	0	Luisa	Middle
C_29	8976	63	41	10	41_10	C	10	29	43532	16	43644	1	12	13	7	6	1	0	0	0		1	0	0	0	Luisa	Middle
C_29	8977	63	41	10	41_10	C	10	29	43532	17	43651	1	14	17	7	6	1	0	0	0		1	0	0	0	Luisa	Middle
C_29	8978	63	41	10	41_10	C	10	29	43532	18	43658	1	14	21	10	10	0	0	0	0		1	0	0	0	Luisa	Middle
C_29	8979	63	41	10	41_10	C	10	29	43532	19	43665	1	13	15	13	13	0	0	0	0		1	0	0	0	Luisa	Middle
C_29	8967	63	41	10	41_10	C	10	29	43532	7	43581	1	10	5	8	8	0	0	0	0		1	0	0	0	Luisa	Middle
C_29	8981	63	41	10	41_10	C	10	29	43532	21	43679	1	13	17	23	23	0	0	0	0		1	0	0	0	Luisa	Middle
C_29	8982	63	41	10	41_10	C	10	29	43532	22	43686	1	24	1	20	20		0	0	0				0	0	Luisa	Middle
C_29	8983	63	41	10	41_10	C	10	29	43532	23	43693	1	32	0	18	18	0	0	0	0				0	0	Luisa	Middle
C_29	8984	63	41	10	41_10	C	10	29	43532	24	43700	1	36	0	27	27	0	0	0	0				0	0	Luisa	Middle
C_29	8985	63	41	10	41_10	C	10	29	43532	25	43707	1	49	0	27	20	7	0	0	0				0	0	Luisa	Middle
C_29	8973	63	41	10	41_10	C	10	29	43532	13	43623	1	15	2	10	6	3	1	0	0		1	0	0	0	Jan	Middle
C_29	8980	63	41	10	41_10	C	10	29	43532	20	43672	1	21	15	17	15	2	0	0	0		1	0	0	0	Luisa	Middle
C_30	10961	64	48	6	48_6	C	10	30	43510	1	43518	0	8	0	2	2	0	0	0	2		1	0	0	0	Luisa	Old
C_30	10962	64	48	6	48_6	C	10	30	43510	2	43525	1	9	8	2	2	0	0	0	0		1	0	0	0	Luisa	Old
C_30	10963	64	48	6	48_6	C	10	30	43510	3	43532	1	10	3	1	1	0	0	0	0		1	0	0	0	Jan	Old
C_30	10965	64	48	6	48_6	C	10	30	43510	5	43546	1	10	9	5	5	0	0	0	0		1	0	0	0	Jan	Old
C_30	10966	64	48	6	48_6	C	10	30	43510	6	43553	1	14	16	9	9	0	0	0	0		1	0	0	0	Jan	Old
C_30	10967	64	48	6	48_6	C	10	30	43510	7	43560	1	14	11	10	10	0	0	0	0		1	0	0	0	Luisa	Old
C_30	10968	64	48	6	48_6	C	10	30	43510	8	43567	1	15	25	15	15	0	0	0	0		1	0	0	0	Luisa	Old
C_30	10969	64	48	6	48_6	C	10	30	43510	9	43574	1	16	32	21	21	0	0	0	0		1	0	0	0	Luisa	Old
C_30	10970	64	48	6	48_6	C	10	30	43510	10	43581	1	17	25	21	19	1	1	0	0		1	0	0	0	Luisa	Old
C_30	10971	64	48	6	48_6	C	10	30	43510	11	43588	1	20	32	35	27	7	1	0	0		1	0	0	0	Luisa	Old
C_30	10972	64	48	6	48_6	C	10	30	43510	12	43595	1	24	19	40	33	7	0	0	0		1	0	0	0	Luisa	Old
C_30	10973	64	48	6	48_6	C	10	30	43510	13	43602	1	24	42	42	36	5	1	0	0		1	0	0	0	Luisa	Old
C_30	10974	64	48	6	48_6	C	10	30	43510	14	43609	1	29	28	36	29	6	1	0	0		1	0	0	0	Luisa	Old
C_30	10975	64	48	6	48_6	C	10	30	43510	15	43616	1	36	39	52	44	8	0	0	0		1	0	0	0	Luisa	Old
C_30	10976	64	48	6	48_6	C	10	30	43510	16	43623	1	30	28	61	52	8	1	0	0		1	0	0	0	Jan	Old
C_30	10977	64	48	6	48_6	C	10	30	43510	17	43630	1	38	34	60	54	3	3	0	0		1	0	0	0	Luisa	Old
C_30	10978	64	48	6	48_6	C	10	30	43510	18	43637	1	40	47	58	53	3	2	0	0		1	0	0	0	Luisa	Old
C_30	10979	64	48	6	48_6	C	10	30	43510	19	43644	1	30	33	62	55	7	0	0	0		1	0	0	0	Luisa	Old
C_30	10980	64	48	6	48_6	C	10	30	43510	20	43651	1	45	26	67	57	10	0	0	0		1	0	0	0	Luisa	Old
C_30	10981	64	48	6	48_6	C	10	30	43510	21	43658	1	62	15	72	54	16	2	0	0		1	0	0	0	Luisa	Old
C_30	10982	64	48	6	48_6	C	10	30	43510	22	43665	1	46	10	67	57	7	3	0	0		1	0	0	0	Luisa	Old
C_30	10983	64	48	6	48_6	C	10	30	43510	23	43672	1	47	6	57	48	6	3	0	0		1	0	0	0	Luisa	Old
C_30	10984	64	48	6	48_6	C	10	30	43510	24	43679	1	29	8	38	26	9	3	0	0		1	0	0	0	Luisa	Old
C_30	10985	64	48	6	48_6	C	10	30	43510	25	43686	1	38	10	14	9	5	0	0	0		1	0	0	0	Luisa	Old
C_30	10986	64	48	6	48_6	C	10	30	43510	26	43693	1	15	14	10	3	6	1	0	0		1	0	0	0	Luisa	Old
C_30	10987	64	48	6	48_6	C	10	30	43510	27	43700	1	12	21	8	5	2	1	0	0		1	0	0	0	Luisa	Old
C_30	10988	64	48	6	48_6	C	10	30	43510	28	43707	1	14	12	8	4	4	0	0	0		1	0	0	0	Luisa	Old
C_30	10989	64	48	6	48_6	C	10	30	43510	29	43714	1	12	15	12	10	1	1	0	0		1	0	0	0	Luisa	Old
C_30	10990	64	48	6	48_6	C	10	30	43510	30	43721	1	11	16	31	27	4	0	0	0		1	0	0	0	Luisa	Old
C_30	10991	64	48	6	48_6	C	10	30	43510	31	43728	1	17	15	28	28	0	0	0	0		1	0	0	0	Jan	Old
C_30	10992	64	48	6	48_6	C	10	30	43510	32	43735	1	22	20	28	25	1	2	0	0		1	0	0	0	Luisa	Old
C_30	10993	64	48	6	48_6	C	10	30	43510	33	43742	1	26	23	25	15	7	3	0	0		1	0	0	0	Luisa	Old
C_30	10994	64	48	6	48_6	C	10	30	43510	34	43749	1	14	18	35	16	12	7	1	0		1	0	0	0	Luisa	Old
C_30	10995	64	48	6	48_6	C	10	30	43510	35	43756	1	19	14	18	1	15	2	0	0		1	0	0	0	Luisa	Old
C_30	10996	64	48	6	48_6	C	10	30	43510	36	43763	1	13	16	14	0	10	4	0	0		1	0	0	0	Luisa	Old
C_30	10997	64	48	6	48_6	C	10	30	43510	37	43770	1	9	9	19	0	16	3	1	0		1	0	0	0	Luisa	Old
C_30	10998	64	48	6	48_6	C	10	30	43510	38	43777	1	8	5	15	3	7	5	2	2		1	0	0	0	Jan	Old
C_30	10999	64	48	6	48_6	C	10	30	43510	39	43784	1	9	7	9	4	5	0	2	0		1	0	0	0	Luisa	Old
C_30	11000	64	48	6	48_6	C	10	30	43510	40	43791	1	12	2	10	1	6	3	3	0		1	0	0	0	Luisa	Old
C_30	11001	64	48	6	48_6	C	10	30	43510	41	43798	1	8	0	8	0	3	5	1	2				0	0	Luisa	Old
C_30	11002	64	48	6	48_6	C	10	30	43510	42	43805	1	8	0	2	0	2	0	0	0				0	0	Luisa	Old
C_30	11003	64	48	6	48_6	C	10	30	43510	43	43812	1	5	0	4	1	2	1	0	0				0	0	Luisa	Old
C_30	11004	64	48	6	48_6	C	10	30	43510	44	43819	1	7	0	3	3	0	0	0	0				0	0	Luisa	Old
C_30	10964	64	48	6	48_6	C	10	30	43510	4	43539	1	11	7	1	1	0	0	0	0		1	0	0	0	Jan	Old
C_9	9282	63	41	9	41_9	C	10	9	43567	2	43581	1	12	5	1	1	0	0	0	0		1	0	0	0	Luisa	Old
C_9	9283	63	41	9	41_9	C	10	9	43567	3	43588	1	9	4	1	1	0	0	0	0		1	0	0	0	Luisa	Old
C_9	9284	63	41	9	41_9	C	10	9	43567	4	43595	1	11	3	0	0	0	0	0	0		1	0	0	0	Luisa	Old
C_9	9285	63	41	9	41_9	C	10	9	43567	5	43602	1	10	6	0	0	0	0	0	0		1	0	0	0	Luisa	Old
C_9	9286	63	41	9	41_9	C	10	9	43567	6	43609	1	10	6	2	2	0	0	0	0		1	0	0	0	Luisa	Old
C_9	9287	63	41	9	41_9	C	10	9	43567	7	43616	1	10	10	3	3	0	0	0	0		1	0	0	0	Luisa	Old
C_9	9288	63	41	9	41_9	C	10	9	43567	8	43623	1	12	10	3	3	0	0	0	0		1	0	0	0	Jan	Old
C_9	9289	63	41	9	41_9	C	10	9	43567	9	43630	1	11	15	4	4	0	0	0	0		1	0	0	0	Luisa	Old
C_9	9290	63	41	9	41_9	C	10	9	43567	10	43637	1	13	8	2	2	0	0	0	0		1	0	0	0	Luisa	Old
C_9	9291	63	41	9	41_9	C	10	9	43567	11	43644	1	10	14	4	4	0	0	0	0		1	0	0	0	Luisa	Old
C_9	9292	63	41	9	41_9	C	10	9	43567	12	43651	1	10	12	11	10	0	1	0	0		1	0	0	0	Luisa	Old
C_9	9293	63	41	9	41_9	C	10	9	43567	13	43658	1	16	6	11	10	1	0	0	0		1	0	0	0	Luisa	Old
C_9	9281	63	41	9	41_9	C	10	9	43567	1	43574	1	10	0	2	2	0	0	0	0		1	0	0	0	Luisa	Old
C_9	9295	63	41	9	41_9	C	10	9	43567	15	43672	1	15	4	16	14	1	1	0	0		1	0	0	0	Luisa	Old
C_9	9296	63	41	9	41_9	C	10	9	43567	16	43679	1	11	5	8	8	0	0	0	0		1	0	0	0	Luisa	Old
C_9	9297	63	41	9	41_9	C	10	9	43567	17	43686	1	17	6	5	4	1	0	0	0		1	0	0	0	Luisa	Old
C_9	9298	63	41	9	41_9	C	10	9	43567	18	43693	1	11	12	4	3	1	0	0	0		1	0	0	0	Luisa	Old
C_9	9299	63	41	9	41_9	C	10	9	43567	19	43700	1	13	13	2	2	0	0	0	0		1	0	0	0	Luisa	Old
C_9	9300	63	41	9	41_9	C	10	9	43567	20	43707	1	8	14	5	5	0	0	0	0		1	0	0	0	Luisa	Old
C_9	9301	63	41	9	41_9	C	10	9	43567	21	43714	1	12	13	2	2	0	0	0	0		1	0	0	0	Luisa	Old
C_9	9302	63	41	9	41_9	C	10	9	43567	22	43721	1	10	12	6	6	0	0	0	0		1	0	0	0	Luisa	Old
C_9	9303	63	41	9	41_9	C	10	9	43567	23	43728	1	14	11	5	5	0	0	0	0		1	0	0	0	Jan	Old
C_9	9304	63	41	9	41_9	C	10	9	43567	24	43735	1	11	15	9	9	0	0	0	0		1	0	0	0	Luisa	Old
C_9	9305	63	41	9	41_9	C	10	9	43567	25	43742	1	14	6	13	12	0	1	0	0		1	0	0	0	Luisa	Old
C_9	9306	63	41	9	41_9	C	10	9	43567	26	43749	1	17	28	12	9	3	0	0	0		1	0	0	0	Luisa	Old
C_9	9294	63	41	9	41_9	C	10	9	43567	14	43665	1	15	5	13	13	0	0	0	0		1	0	0	0	Luisa	Old
C_9	9308	63	41	9	41_9	C	10	9	43567	28	43763	1	11	13	11	8	2	1	0	0		1	0	0	0	Luisa	Old
C_9	9309	63	41	9	41_9	C	10	9	43567	29	43770	1	14	13	6	4	2	0	0	0		1	0	0	0	Luisa	Old
C_9	9310	63	41	9	41_9	C	10	9	43567	30	43777	1	15	13	6	3	2	1	0	0		1	0	0	0	Jan	Old
C_9	9311	63	41	9	41_9	C	10	9	43567	31	43784	1	9	8	6	5	1	0	0	0		1	0	0	0	Luisa	Old
C_9	9312	63	41	9	41_9	C	10	9	43567	32	43791	1	9	8	7	5	1	1	0	0		1	0	0	0	Luisa	Old
C_9	9313	63	41	9	41_9	C	10	9	43567	33	43798	1	13	13	4	4	0	0	0	0		1	0	0	0	Luisa	Old
C_9	9314	63	41	9	41_9	C	10	9	43567	34	43805	1	9	9	7	5	2	0	0	0		1	0	0	0	Jan	Old
C_9	9315	63	41	9	41_9	C	10	9	43567	35	43812	1	11	12	9	6	3	0	0	0		1	0	0	0	Luisa	Old
C_9	9316	63	41	9	41_9	C	10	9	43567	36	43819	1	10	6	10	10	0	0	0	0		1	0	0	0	Luisa	Old
C_9	9317	63	41	9	41_9	C	10	9	43567	37	43822	1	15	2	8	8	0	0	0	0				0	0	Luisa	Old
C_9	9318	63	41	9	41_9	C	10	9	43567	38	43833	1								0				0	0	Luisa	Old
C_9	9319	63	41	9	41_9	C	10	9	43567	39	43840	1	12	0	1	0	0	1	0	0				0	0	Luisa	Old
C_9	9307	63	41	9	41_9	C	10	9	43567	27	43756	1	18	17	7	4	2	1	0	0		1	0	0	0	Luisa	Old
C_9	9321	63	41	9	41_9	C	10	9	43567	41	43854	1	9	0	1	1	0	0	0	0				0	0	Luisa	Old
C_9	9320	63	41	9	41_9	C	10	9	43567	40	43847	1	10	0	2	1	1	0	0	0				0	0	Luisa	Old
D_10	3602	66	41	8	41_8	D	30	10	43528	2	43542	0	27	9	5	5	0	0	0	3		1	0	0	0	Jan	Middle
D_10	3604	66	41	8	41_8	D	30	10	43528	4	43556	1	34	6	0	0	0	0	0	0		1	0	0	0	Luisa	Middle
D_10	3601	66	41	8	41_8	D	30	10	43528	1	43535	0	28	0	1	1	0	0	0	2		1	0	0	0	Jan	Middle
D_10	3606	66	41	8	41_8	D	30	10	43528	6	43570	1	31	15	7	7	0	0	0	0		1	0	0	0	Luisa	Middle
D_10	3603	66	41	8	41_8	D	30	10	43528	3	43549	1	29	7	4	4	0	0	0	0		1	0	0	0	Jan	Middle
D_10	3608	66	41	8	41_8	D	30	10	43528	8	43584	1	36	16	7	7	0	0	0	0		1	0	0	0	Luisa	Middle
D_10	3609	66	41	8	41_8	D	30	10	43528	9	43591	1	33	21	10	8	2	0	0	0		1	0	0	0	Luisa	Middle
D_10	3610	66	41	8	41_8	D	30	10	43528	10	43598	1	28	24	11	9	2	0	0	0		1	0	0	0	Luisa	Middle
D_10	3607	66	41	8	41_8	D	30	10	43528	7	43577	1	30	13	9	9	0	0	0	0		1	0	0	0	Luisa	Middle
D_10	3612	66	41	8	41_8	D	30	10	43528	12	43612	1	31	27	17	16	1	0	0	0		1	0	0	0	Julia	Middle
D_10	3613	66	41	8	41_8	D	30	10	43528	13	43619	1	30	32	25	25	0	0	0	0		1	0	0	0	Julia	Middle
D_10	3614	66	41	8	41_8	D	30	10	43528	14	43626	1	36	14	22	18	3	1	0	0		1	0	0	0	Luisa	Middle
D_10	3615	66	41	8	41_8	D	30	10	43528	15	43633	1	41	13	18	16	2	0	0	0		1	0	0	0	Luisa	Middle
D_10	3616	66	41	8	41_8	D	30	10	43528	16	43640	1	30	15	24	16	7	1	0	0		1	0	0	0	Luisa	Middle
D_10	3617	66	41	8	41_8	D	30	10	43528	17	43647	1	42	13	26	26	0	0	0	0		1	0	0	0	Luisa	Middle
D_10	3605	66	41	8	41_8	D	30	10	43528	5	43563	1	30	13	2	2	0	0	0	0		1	0	0	0	Luisa	Middle
D_10	3619	66	41	8	41_8	D	30	10	43528	19	43661	1	40	13	11	9	1	1	0	0		1	0	0	0	Luisa	Middle
D_10	3620	66	41	8	41_8	D	30	10	43528	20	43668	1	32	6	9	8	1	0	0	0		1	0	0	0	Luisa	Middle
D_10	3621	66	41	8	41_8	D	30	10	43528	21	43675	1	31	22	7	5	2	0	0	0		1	0	0	0	Luisa	Middle
D_10	3622	66	41	8	41_8	D	30	10	43528	22	43682	1	28	5	10	8	1	1	0	0		0		0	0	Luisa	Middle
D_10	3623	66	41	8	41_8	D	30	10	43528	23	43689	1	29	0	8	6	1	1	0	0		0		0	0	Luisa	Middle
D_10	3611	66	41	8	41_8	D	30	10	43528	11	43605	1	36	15	10	7	3	0	0	0		1	0	0	0	Luisa	Middle
D_10	3625	66	41	8	41_8	D	30	10	43528	25	43703	1	32	0	18	17	1	0	0	0		0		0	0	Luisa	Middle
D_10	3626	66	41	8	41_8	D	30	10	43528	26	43710	1	28	0	13	10	3	0	0	0		0		0	0	Luisa	Middle
D_10	3618	66	41	8	41_8	D	30	10	43528	18	43654	1	40	9	15	12	3	0	0	0		1	0	0	0	Luisa	Middle
D_10	3624	66	41	8	41_8	D	30	10	43528	24	43696	1	29	0	10	10	0	0	0	0		0		0	0	Luisa	Middle
D_12	2242	58	18	9	18_9	D	30	12	43482	2	43493	0	30	0	0	0	0	0	0	0		1	0	0	0	Luisa	Old
D_12	2243	58	18	9	18_9	D	30	12	43482	3	43500	0	28	0	0	0	0	0	0	2		1	0	0	0	Luisa	Old
D_12	2244	58	18	9	18_9	D	30	12	43482	4	43507	0	28	0	4	4	0	0	0	2		1	0	0	0	Luisa	Old
D_12	2246	58	18	9	18_9	D	30	12	43482	6	43521	1	27	8	7	7	0	0	0	3		1	0	0	0	Luisa	Old
D_12	2247	58	18	9	18_9	D	30	12	43482	7	43528	1	30	3	0	0	0	0	0	0		1	0	0	0	Luisa	Old
D_12	2248	58	18	9	18_9	D	30	12	43482	8	43535	1	27	4	0	0	0	0	0	3		1	0	0	0	Jan	Old
D_12	2245	58	18	9	18_9	D	30	12	43482	5	43514	1	29	4	3	3	0	0	0	1		1	0	0	0	Luisa	Old
D_12	2250	58	18	9	18_9	D	30	12	43482	10	43549	1	33	4	6	6	0	0	0	0		1	0	0	0	Jan	Old
D_12	2251	58	18	9	18_9	D	30	12	43482	11	43556	1	32	8	6	6	0	0	0	0		1	0	0	0	Luisa	Old
D_12	2252	58	18	9	18_9	D	30	12	43482	12	43563	1	30	9	8	8	0	0	0	0		1	0	0	0	Luisa	Old
D_12	2253	58	18	9	18_9	D	30	12	43482	13	43570	1	33	8	10	10	0	0	0	0		1	0	0	0	Luisa	Old
D_12	2241	58	18	9	18_9	D	30	12	43482	1	43486	0	30	0	0	0	0	0	0	0		1	0	0	0	Luisa	Old
D_12	2255	58	18	9	18_9	D	30	12	43482	15	43584	1	36	9	13	13	0	0	0	0		1	0	0	0	Luisa	Old
D_12	2256	58	18	9	18_9	D	30	12	43482	16	43591	1	34	9	13	13	0	0	0	0		1	0	0	0	Luisa	Old
D_12	2257	58	18	9	18_9	D	30	12	43482	17	43598	1	36	8	11	11	0	0	0	0		1	0	0	0	Luisa	Old
D_12	2258	58	18	9	18_9	D	30	12	43482	18	43605	1	35	8	11	10	0	1	0	0		1	0	0	0	Luisa	Old
D_12	2259	58	18	9	18_9	D	30	12	43482	19	43612	1	38	6	9	9	0	0	0	0		1	0	0	0	Jan	Old
D_12	2260	58	18	9	18_9	D	30	12	43482	20	43619	1	30	9	14	14	0	0	0	0		1	0	0	0	Jan	Old
D_12	2261	58	18	9	18_9	D	30	12	43482	21	43626	1	39	13	16	16	0	0	0	0		1	0	0	0	Luisa	Old
D_12	2249	58	18	9	18_9	D	30	12	43482	9	43542	1	24	4	5	5	0	0	0	5		1	0	0	0	Jan	Old
D_12	2263	58	18	9	18_9	D	30	12	43482	23	43640	1	41	10	16	15	1	0	0	0		1	0	0	0	Luisa	Old
D_12	2264	58	18	9	18_9	D	30	12	43482	24	43647	1	34	5	19	16	1	2	0	0		1	0	0	0	Luisa	Old
D_12	2265	58	18	9	18_9	D	30	12	43482	25	43654	1	42	7	16	14	1	1	0	0		1	0	0	0	Luisa	Old
D_12	2266	58	18	9	18_9	D	30	12	43482	26	43661	1	37	7	13	13	0	0	0	0		1	0	0	0	Luisa	Old
D_12	2254	58	18	9	18_9	D	30	12	43482	14	43577	1	34	5	11	11	0	0	0	0		1	0	0	0	Luisa	Old
D_12	2268	58	18	9	18_9	D	30	12	43482	28	43675	1	39	13	19	18	0	1	0	0		1	0	0	0	Luisa	Old
D_12	2269	58	18	9	18_9	D	30	12	43482	29	43682	1	35	10	22	22	0	0	0	0		1	0	0	0	Luisa	Old
D_12	2270	58	18	9	18_9	D	30	12	43482	30	43689	1	38	11	19	19	0	0	0	0		1	0	0	0	Luisa	Old
D_12	2271	58	18	9	18_9	D	30	12	43482	31	43696	1	34	10	24	20	3	1	0	0		1	0	0	0	Luisa	Old
D_12	2272	58	18	9	18_9	D	30	12	43482	32	43703	1	38	10	19	15	3	1	0	0		1	0	0	0	Luisa	Old
D_12	2273	58	18	9	18_9	D	30	12	43482	33	43710	1	39	11	15	15	0	0	0	0		1	0	0	0	Luisa	Old
D_12	2274	58	18	9	18_9	D	30	12	43482	34	43717	1	33	13	16	14	2	0	0	0		1	0	0	0	Luisa	Old
D_12	2262	58	18	9	18_9	D	30	12	43482	22	43633	1	37	16	15	15	0	0	0	0		1	0	0	0	Luisa	Old
D_12	2276	58	18	9	18_9	D	30	12	43482	36	43731	1	34	11	17	16	1	0	0	0		1	0	0	0	Luisa	Old
D_12	2277	58	18	9	18_9	D	30	12	43482	37	43738	1	35	8	19	16	1	2	0	0		1	0	0	0	Luisa	Old
D_12	2278	58	18	9	18_9	D	30	12	43482	38	43745	1	39	9	21	16	3	2	0	0		1	0	0	0	Luisa	Old
D_12	2279	58	18	9	18_9	D	30	12	43482	39	43752	1	36	8	17	15	2	0	0	0		1	0	0	0	Luisa	Old
D_12	2267	58	18	9	18_9	D	30	12	43482	27	43668	1	33	11	18	15	1	2	0	0		1	0	0	0	Luisa	Old
D_12	2281	58	18	9	18_9	D	30	12	43482	41	43766	1	31	12	18	15	1	2	0	0		1	0	0	0	Luisa	Old
D_12	2282	58	18	9	18_9	D	30	12	43482	42	43773	1	46	10	13	8	4	1	0	0		1	0	0	0	Jan	Old
D_12	2283	58	18	9	18_9	D	30	12	43482	43	43780	1	32	9	11	5	6	0	0	0		1	0	0	0	Luisa	Old
D_12	2284	58	18	9	18_9	D	30	12	43482	44	43787	1	31	4	11	9	2	0	0	0		1	0	0	0	Luisa	Old
D_12	2285	58	18	9	18_9	D	30	12	43482	45	43794	1	34	0	13	13	0	0	0	0				0	0	Luisa	Old
D_12	2286	58	18	9	18_9	D	30	12	43482	46	43801	1	40	0	14	11	1	2	0	0				0	0	Luisa	Old
D_12	2287	58	18	9	18_9	D	30	12	43482	47	43808	1	42	0	6	6	0	0	0	0				0	0	Luisa	Old
D_12	2288	58	18	9	18_9	D	30	12	43482	48	43815	1	46	0	6	6	0	0	0	0				0	0	Luisa	Old
D_12	2275	58	18	9	18_9	D	30	12	43482	35	43724	1	37	9	19	13	4	2	0	0		1	0	0	0	Luisa	Old
D_12	2280	58	18	9	18_9	D	30	12	43482	40	43759	1	18	0	2	0	2	0	0	0		1	0	0	0	Luisa	Old
D_13	5041	61	34	4	34_4	D	30	13	43530	1	43537	0	24	2	3	3	0	0	0	7		1	0	0	0	Jan	Middle
D_13	5044	61	34	4	34_4	D	30	13	43530	4	43558	1	30	9	0	0	0	0	0	0		1	0	0	0	Luisa	Middle
D_13	5045	61	34	4	34_4	D	30	13	43530	5	43565	1	29	10	4	4	0	0	0	0		1	0	0	0	Luisa	Middle
D_13	5046	61	34	4	34_4	D	30	13	43530	6	43572	1	25	12	8	8	0	0	0	3		1	0	0	0	Luisa	Middle
D_13	5043	61	34	4	34_4	D	30	13	43530	3	43551	1	30	7	3	3	0	0	0	0		1	0	0	0	Jan	Middle
D_13	5048	61	34	4	34_4	D	30	13	43530	8	43586	1	34	9	9	9	0	0	0	0		1	0	0	0	Luisa	Middle
D_13	5049	61	34	4	34_4	D	30	13	43530	9	43593	1	30	15	6	6	0	0	0	0		1	0	0	0	Luisa	Middle
D_13	5050	61	34	4	34_4	D	30	13	43530	10	43600	1	32	9	6	5	1	0	0	0		1	0	0	0	Luisa	Middle
D_13	5047	61	34	4	34_4	D	30	13	43530	7	43579	1	28	12	10	9	1	0	0	0		1	0	0	0	Luisa	Middle
D_13	5052	61	34	4	34_4	D	30	13	43530	12	43614	1	30	8	4	4	0	0	0	0		1	0	0	0	Luisa	Middle
D_13	5053	61	34	4	34_4	D	30	13	43530	13	43621	1	35	9	5	3	2	0	0	0		1	0	0	0	Julia	Middle
D_13	5054	61	34	4	34_4	D	30	13	43530	14	43628	1	26	14	11	9	2	0	0	2		1	0	0	0	Luisa	Middle
D_13	5055	61	34	4	34_4	D	30	13	43530	15	43635	1	32	17	12	10	2	0	0	0		1	0	0	0	Luisa	Middle
D_13	5056	61	34	4	34_4	D	30	13	43530	16	43642	1	33	16	14	12	1	1	0	0		1	0	0	0	Luisa	Middle
D_13	5057	61	34	4	34_4	D	30	13	43530	17	43649	1	34	19	13	9	3	1	0	0		1	0	0	0	Luisa	Middle
D_13	5058	61	34	4	34_4	D	30	13	43530	18	43656	1	30	8	14	11	2	1	0	0		1	0	0	0	Luisa	Middle
D_13	5059	61	34	4	34_4	D	30	13	43530	19	43663	1	29	11	17	11	5	1	0	0		1	0	0	0	Luisa	Middle
D_13	5060	61	34	4	34_4	D	30	13	43530	20	43670	1	29	16	20	12	6	2	0	0		1	0	0	0	Luisa	Middle
D_13	5061	61	34	4	34_4	D	30	13	43530	21	43677	1	27	11	11	5	5	1	0	0		1	0	0	0	Luisa	Middle
D_13	5062	61	34	4	34_4	D	30	13	43530	22	43684	1	31	5	7	3	4	0	0	0				0	0	Luisa	Middle
D_13	5063	61	34	4	34_4	D	30	13	43530	23	43691	1	28	0	11	3	8	0	0	2				0	0	Luisa	Middle
D_13	5051	61	34	4	34_4	D	30	13	43530	11	43607	1	32	13	5	3	2	0	0	0		1	0	0	0	Luisa	Middle
D_13	5065	61	34	4	34_4	D	30	13	43530	25	43705	1	27	0	18	16	2	0	0	0				0	0	Luisa	Middle
D_13	5066	61	34	4	34_4	D	30	13	43530	26	43712	1	26	0	11	10	1	0	0	0				0	0	Luisa	Middle
D_13	5042	61	34	4	34_4	D	30	13	43530	2	43544	1	28	6	5	5	0	0	0	0		1	0	0	0	Jan	Middle
D_13	5064	61	34	4	34_4	D	30	13	43530	24	43698	1	27	0	13	10	3	0	0	0				0	0	Luisa	Middle
D_15	8242	67	18	6	18_6	D	30	15	43584	2	43600	1	26	5	4	4	0	0	0	4		1	0	0	0	Luisa	Old
D_15	8243	67	18	6	18_6	D	30	15	43584	3	43607	1	32	9	1	1	0	0	0	0		1	0	0	0	Luisa	Old
D_15	8241	67	18	6	18_6	D	30	15	43584	1	43593	1	31	0	3	3	0	0	0	0		1	0	0	0	Luisa	Old
D_15	8246	67	18	6	18_6	D	30	15	43584	6	43628	1	26	14	12	10	0	2	0	3		1	0	0	0	Luisa	Old
D_15	8247	67	18	6	18_6	D	30	15	43584	7	43635	1	32	12	11	10	0	1	0	0		1	0	0	0	Luisa	Old
D_15	8244	67	18	6	18_6	D	30	15	43584	4	43614	1	33	9	0	0	0	0	0	0		1	0	0	0	Luisa	Old
D_15	8249	67	18	6	18_6	D	30	15	43584	9	43649	1	30	11	18	18	0	0	0	0		1	0	0	0	Luisa	Old
D_15	8250	67	18	6	18_6	D	30	15	43584	10	43656	1	42	9	26	22	4	0	0	0		1	0	0	0	Luisa	Old
D_15	8251	67	18	6	18_6	D	30	15	43584	11	43663	1	39	11	22	18	2	2	0	0		1	0	0	0	Luisa	Old
D_15	8248	67	18	6	18_6	D	30	15	43584	8	43642	1	35	13	8	8	0	0	0	0		1	0	0	0	Luisa	Old
D_15	8253	67	18	6	18_6	D	30	15	43584	13	43677	1	26	16	18	17	1	0	0	0		1	0	0	0	Luisa	Old
D_15	8254	67	18	6	18_6	D	30	15	43584	14	43684	1	34	17	20	14	6	0	0	0		1	0	0	0	Luisa	Old
D_15	8255	67	18	6	18_6	D	30	15	43584	15	43691	1	36	20	26	25	0	1	0	0		1	0	0	0	Luisa	Old
D_15	8256	67	18	6	18_6	D	30	15	43584	16	43698	1	44	23	30	26	2	2	0	0		1	0	0	0	Luisa	Old
D_15	8257	67	18	6	18_6	D	30	15	43584	17	43705	1	45	28	37	33	2	2	0	0		1	0	0	0	Luisa	Old
D_15	8245	67	18	6	18_6	D	30	15	43584	5	43621	1	25	13	4	4	0	0	0	0		1	0	0	0	Julia	Old
D_15	8259	67	18	6	18_6	D	30	15	43584	19	43719	1	47	20	38	34	3	1	0	0		1	0	0	0	Lina	Old
D_15	8260	67	18	6	18_6	D	30	15	43584	20	43726	1	43	20	39	33	5	1	0	0		1	0	0	0	Luisa	Old
D_15	8261	67	18	6	18_6	D	30	15	43584	21	43733	1	46	22	32	26	5	1	0	0		1	0	0	0	Luisa	Old
D_15	8262	67	18	6	18_6	D	30	15	43584	22	43740	1	50	22	37	34	3	0	0	0		1	0	0	0	Luisa	Old
D_15	8263	67	18	6	18_6	D	30	15	43584	23	43747	1	46	23	32	28	2	2	0	0		1	0	0	0	Luisa	Old
D_15	8264	67	18	6	18_6	D	30	15	43584	24	43754	1	45	21	39	33	6	0	0	0		1	0	0	0	Luisa	Old
D_15	8265	67	18	6	18_6	D	30	15	43584	25	43761	1	41	21	42	24	14	4	0	0		1	0	0	0	Luisa	Old
D_15	8266	67	18	6	18_6	D	30	15	43584	26	43768	1	46	10	29	7	22	0	0	0		1	0	0	0	Luisa	Old
D_15	8267	67	18	6	18_6	D	30	15	43584	27	43775	1					1	1				1	0	0	0	Jan	Old
D_15	8268	67	18	6	18_6	D	30	15	43584	28	43782	1	26	4	38	0	38	0	1	4		1	0	0	0	Luisa	Old
D_15	8269	67	18	6	18_6	D	30	15	43584	29	43789	1	25	13	24	0	21	3	0	5		1	0	0	0	Luisa	Old
D_15	8270	67	18	6	18_6	D	30	15	43584	30	43796	1	29	8	15	0	12	3	0	0		1	0	0	0	Luisa	Old
D_15	8271	67	18	6	18_6	D	30	15	43584	31	43803	1	27	7	9	0	8	1	0	3		1	0	0	0	Luisa	Old
D_15	8272	67	18	6	18_6	D	30	15	43584	32	43810	1	26	3	4	0	3	1	0	0		1	0	0	0	Luisa	Old
D_15	8273	67	18	6	18_6	D	30	15	43584	33	43817	1	26	0	5	1	3	1	0	0				0	0	Luisa	Old
D_15	8274	67	18	6	18_6	D	30	15	43584	34	43822	1	28	0	5	1	4	0	0	0				0	0	Luisa	Old
D_15	8275	67	18	6	18_6	D	30	15	43584	35	43831	1								0				0	0	Luisa	Old
D_15	8276	67	18	6	18_6	D	30	15	43584	36	43838	1	20	0	5	1	4	0	0	0				0	0	Luisa	Old
D_15	8277	67	18	6	18_6	D	30	15	43584	37	43845	1	24	0	1	0	1	0	0	0				0	0	Luisa	Old
D_15	8252	67	18	6	18_6	D	30	15	43584	12	43670	1	40	12	21	16	4	1	0	0		1	0	0	0	Luisa	Old
D_15	8258	67	18	6	18_6	D	30	15	43584	18	43712	1	42	20	41	36	5	0	0	0		1	0	0	0	Luisa	Old
D_20	9602	63	48	6	48_6	D	30	20	43532	2	43546	0	27	5	2	2	0	0	0	4		1	0	0	0	Jan	Middle
D_20	9603	63	48	6	48_6	D	30	20	43532	3	43553	1	27	4	7	7	0	0	0	1		1	0	0	0	Jan	Middle
D_20	9604	63	48	6	48_6	D	30	20	43532	4	43560	1	29	5	3	3	0	0	0	0		1	0	0	0	Luisa	Middle
D_20	9605	63	48	6	48_6	D	30	20	43532	5	43567	1	31	8	0	0	0	0	0	0		1	0	0	0	Luisa	Middle
D_20	9606	63	48	6	48_6	D	30	20	43532	6	43574	1	29	9	4	4	0	0	0	1		1	0	0	0	Luisa	Middle
D_20	9607	63	48	6	48_6	D	30	20	43532	7	43581	1	29	6	6	6	0	0	0	0		1	0	0	0	Luisa	Middle
D_20	9608	63	48	6	48_6	D	30	20	43532	8	43588	1	32	10	5	5	0	0	0	0		1	0	0	0	Luisa	Middle
D_20	9609	63	48	6	48_6	D	30	20	43532	9	43595	1	28	11	3	3	0	0	0	0		1	0	0	0	Luisa	Middle
D_20	9610	63	48	6	48_6	D	30	20	43532	10	43602	1	27	2	6	5	1	0	0	3		1	0	0	0	Luisa	Middle
D_20	9611	63	48	6	48_6	D	30	20	43532	11	43609	1	29	5	7	6	1	0	0	0		1	0	0	0	Luisa	Middle
D_20	9612	63	48	6	48_6	D	30	20	43532	12	43616	1	31	4	7	7	0	0	0	0		1	0	0	0	Luisa	Middle
D_20	9613	63	48	6	48_6	D	30	20	43532	13	43623	1	31	2	8	8	0	0	0	0		1	0	0	0	Jan	Middle
D_20	9601	63	48	6	48_6	D	30	20	43532	1	43539	0	28	0	0	0	0	0	0	2		1	0	0	0	Jan	Middle
D_20	9615	63	48	6	48_6	D	30	20	43532	15	43637	1	27	7	0	0	0	0	0	3		1	0	0	0	Luisa	Middle
D_20	9616	63	48	6	48_6	D	30	20	43532	16	43644	1	29	10	2	1	1	0	0	0		1	0	0	0	Luisa	Middle
D_20	9617	63	48	6	48_6	D	30	20	43532	17	43651	1	25	9	5	4	1	0	0	3		1	0	0	0	Luisa	Middle
D_20	9618	63	48	6	48_6	D	30	20	43532	18	43658	1	27	15	6	6	0	0	0	3		1	0	0	0	Luisa	Middle
D_20	9619	63	48	6	48_6	D	30	20	43532	19	43665	1	32	19	10	10	0	0	0	0		1	0	0	0	Luisa	Middle
D_20	9620	63	48	6	48_6	D	30	20	43532	20	43672	1	33	22	16	16	0	0	0	0		1	0	0	0	Luisa	Middle
D_20	9621	63	48	6	48_6	D	30	20	43532	21	43679	1	31	9	17	17	0	0	0	0		1	0	0	0	Luisa	Middle
D_20	9622	63	48	6	48_6	D	30	20	43532	22	43686	1	45	2	24	19	2	3	0	0				0	0	Luisa	Middle
D_20	9623	63	48	6	48_6	D	30	20	43532	23	43693	1	45	0	24	19	5	0	0	0				0	0	Luisa	Middle
D_20	9624	63	48	6	48_6	D	30	20	43532	24	43700	1	50	0	18	15	3	0	0	0				0	0	Luisa	Middle
D_20	9625	63	48	6	48_6	D	30	20	43532	25	43707	1	49	0	13	4	9	0	0	0				0	0	Luisa	Middle
D_20	9626	63	48	6	48_6	D	30	20	43532	26	43714	1	50	0	3	1	2	0	0	0				0	0	Luisa	Middle
D_20	9614	63	48	6	48_6	D	30	20	43532	14	43630	1	31	7	4	3	1	0	0	0		1	0	0	0	Luisa	Middle
E_13b	13120	61	41	4	41_4	E	20	13b	43593	1	43600	0	20	0	0	0	0	0	0	0		1	0	0	0	Luisa	Old
E_13b	13120	61	41	4	41_4	E	20	13b	43593	2	43607	1	20	5	5	5	0	0	0	0		1	0	0	0	Luisa	Old
E_13b	13120	61	41	4	41_4	E	20	13b	43593	3	43614	1	20	7	6	6	0	0	0	0		1	0	0	0	Luisa	Old
E_13b	13120	61	41	4	41_4	E	20	13b	43593	4	43621	1	20	7	1	1	0	0	0	0		1	0	0	0	Julia	Old
E_13b	13120	61	41	4	41_4	E	20	13b	43593	5	43628	1	16	4	0	0	0	0	0	4		1	0	0	0	Luisa	Old
E_13b	13120	61	41	4	41_4	E	20	13b	43593	6	43635	1	17	8	3	3	0	0	0	3		1	0	0	0	Luisa	Old
E_13b	13120	61	41	4	41_4	E	20	13b	43593	7	43642	1	20	5	7	7	0	0	0	0		1	0	0	0	Luisa	Old
E_13b	13120	61	41	4	41_4	E	20	13b	43593	8	43649	1	22	3	10	10	0	0	0	0		1	0	0	0	Luisa	Old
E_13b	13120	61	41	4	41_4	E	20	13b	43593	9	43656	1	19	5	14	14	0	0	0	0		1	0	0	0	Luisa	Old
E_13b	13120	61	41	4	41_4	E	20	13b	43593	10	43663	1	27	5	13	13	0	0	0	0		1	0	0	0	Luisa	Old
E_13b	13120	61	41	4	41_4	E	20	13b	43593	11	43670	1	24	10	8	7	1	0	0	0		1	0	0	0	Luisa	Old
E_13b	13120	61	41	4	41_4	E	20	13b	43593	12	43677	1	20	14	0	0	0	0	0	0		1	0	0	0	Luisa	Old
E_13b	13120	61	41	4	41_4	E	20	13b	43593	13	43684	1	24	10	6	3	3	0	0	0		1	0	0	0	Luisa	Old
E_13b	13120	61	41	4	41_4	E	20	13b	43593	14	43691	1	20	13	7	7	0	0	0	0		1	0	0	0	Luisa	Old
E_13b	13120	61	41	4	41_4	E	20	13b	43593	15	43698	1	23	20	13	13	0	0	0	0		1	0	0	0	Luisa	Old
E_13b	13120	61	41	4	41_4	E	20	13b	43593	16	43705	1	26	18	12	12	0	0	0	0		1	0	0	0	Luisa	Old
E_13b	13120	61	41	4	41_4	E	20	13b	43593	17	43712	1	27	17	6	6	0	0	0	0		1	0	0	0	Luisa	Old
E_13b	13120	61	41	4	41_4	E	20	13b	43593	18	43719	1	22	7	9	4	3	2	0	0		1	0	0	0	Mathi	Old
E_13b	13120	61	41	4	41_4	E	20	13b	43593	19	43726	1	21	16	9	9	0	0	0	0		1	0	0	0	Luisa	Old
E_13b	13120	61	41	4	41_4	E	20	13b	43593	20	43733	1	20	11	12	9	3	0	0	0		1	0	0	0	Luisa	Old
E_13b	13120	61	41	4	41_4	E	20	13b	43593	21	43740	1	23	14	16	12	4	0	0	0		1	0	0	0	Luisa	Old
E_13b	13120	61	41	4	41_4	E	20	13b	43593	22	43747	1	25	16	17	15	2	0	0	0		1	0	0	0	Luisa	Old
E_13b	13120	61	41	4	41_4	E	20	13b	43593	23	43754	1	26	20	13	11	2	0	0	0		1	0	0	0	Luisa	Old
E_13b	13120	61	41	4	41_4	E	20	13b	43593	24	43761	1	23	27	15	6	8	1	0	0		1	0	0	0	Luisa	Old
E_13b	13120	61	41	4	41_4	E	20	13b	43593	25	43768	1	21	23	5	2	3	0	0	0		1	0	0	0	Luisa	Old
E_13b	13120	61	41	4	41_4	E	20	13b	43593	26	43775	1	21	16	19	7	12	0	0	0		1	0	0	0	Jan	Old
E_13b	13120	61	41	4	41_4	E	20	13b	43593	27	43782	1	21	16	19	7	12	0	0	0		1	0	0	0	Luisa	Old
E_13b	13120	61	41	4	41_4	E	20	13b	43593	28	43789	1	21	19	11	6	5	0	0	0		1	0	0	0	Luisa	Old
E_13b	13120	61	41	4	41_4	E	20	13b	43593	29	43796	1	19	13	17	7	9	1	0	0		1	0	0	0	Luisa	Old
E_13b	13120	61	41	4	41_4	E	20	13b	43593	30	43803	1	19	11	9	3	6	0	0	0		1	0	0	0	Luisa	Old
E_13b	13120	61	41	4	41_4	E	20	13b	43593	31	43810	1	19	10	13	4	9	0	0	0		1	0	0	0	Luisa	Old
E_13b	13120	61	41	4	41_4	E	20	13b	43593	32	43817	1	18	3	17	4	13	0	1	0		1	0	0	0	Luisa	Old
E_13b	13120	61	41	4	41_4	E	20	13b	43593	33	43822	1	19	0	6	0	6	0	0	0				0	0	Luisa	Old
E_23	12161	65	48	13	48_13	E	20	23	43539	1	43546	0	19	0	2	2	0	0	0	1		1	0	0	0	Jan	Middle
E_23	12162	65	48	13	48_13	E	20	23	43539	2	43553	0	18	0	1	1	0	0	0	0		1	0	0	0	Jan	Middle
E_23	12163	65	48	13	48_13	E	20	23	43539	3	43560	1	15	7	0	0	0	0	0	5		1	0	0	0	Luisa	Middle
E_23	12164	65	48	13	48_13	E	20	23	43539	4	43567	1	20	8	0	0	0	0	0	0		1	0	0	0	Luisa	Middle
E_23	12165	65	48	13	48_13	E	20	23	43539	5	43574	1	16	7	0	0	0	0	0	4		1	0	0	0	Luisa	Middle
E_23	12166	65	48	13	48_13	E	20	23	43539	6	43581	1	19	8	2	2	0	0	0	0		1	0	0	0	Luisa	Middle
E_23	12167	65	48	13	48_13	E	20	23	43539	7	43588	1	16	14	7	7	0	0	0	4		1	0	0	0	Luisa	Middle
E_23	12168	65	48	13	48_13	E	20	23	43539	8	43595	1	23	10	6	6	0	0	0	0		1	0	0	0	Luisa	Middle
E_23	12169	65	48	13	48_13	E	20	23	43539	9	43602	1	24	10	7	7	0	0	0	0		1	0	0	0	Luisa	Middle
E_23	12170	65	48	13	48_13	E	20	23	43539	10	43609	1	21	6	14	14	0	0	0	0		1	0	0	0	Luisa	Middle
E_23	12171	65	48	13	48_13	E	20	23	43539	11	43616	1	22	2	16	15	0	1	0	0		1	0	0	0	Luisa	Middle
E_23	12172	65	48	13	48_13	E	20	23	43539	12	43623	1	28	1	11	9	2	0	0	0		1	0	0	0	Julia	Middle
E_23	12173	65	48	13	48_13	E	20	23	43539	13	43630	1	28	3	8	7	1	0	0	0		1	0	0	0	Luisa	Middle
E_23	12174	65	48	13	48_13	E	20	23	43539	14	43637	1	24	7	8	5	3	0	0	0		1	0	0	0	Luisa	Middle
E_23	12175	65	48	13	48_13	E	20	23	43539	15	43644	1	21	8	2	2	0	0	0	0		1	0	0	0	Luisa	Middle
E_23	12176	65	48	13	48_13	E	20	23	43539	16	43651	1	24	8	4	3	1	0	0	0		1	0	0	0	Luisa	Middle
E_23	12177	65	48	13	48_13	E	20	23	43539	17	43658	1	20	14	7	6	1	0	0	0		1	0	0	0	Luisa	Middle
E_23	12178	65	48	13	48_13	E	20	23	43539	18	43665	1	21	16	11	10	1	0	0	0		1	0	0	0	Luisa	Middle
E_23	12179	65	48	13	48_13	E	20	23	43539	19	43672	1	22	19	14	14	0	0	0	0		1	0	0	0	Luisa	Middle
E_23	12180	65	48	13	48_13	E	20	23	43539	20	43679	1	27	21	18	17	0	1	0	0		1	0	0	0	Luisa	Middle
E_23	12181	65	48	13	48_13	E	20	23	43539	21	43686	1	35	0	25	22	2	1	0	0				0	0	Luisa	Middle
E_23	12182	65	48	13	48_13	E	20	23	43539	22	43693	1	32	0	25	23	2	0	0	0				0	0	Luisa	Middle
E_23	12183	65	48	13	48_13	E	20	23	43539	23	43700	1	39	0	28	22	5	1	0	0				0	0	Luisa	Middle
E_23	12184	65	48	13	48_13	E	20	23	43539	24	43707	1	47	0	18	15	3	0	0	0				0	0	Luisa	Middle
E_23	12185	65	48	13	48_13	E	20	23	43539	25	43714	1	56	0	9	7	2	0	0	0				0	0	Luisa	Middle
E_9	7522	60	48	9	48_9	E	20	9	43531	2	43544	1	18	6	3	3	0	0	0	2		1	0	0	0	Jan	Old
E_9	7524	60	48	9	48_9	E	20	9	43531	4	43558	1	22	4	1	1	0	0	0	2		1	0	0	0	Luisa	Old
E_9	7525	60	48	9	48_9	E	20	9	43531	5	43565	1	18	8	2	2	0	0	0	0		1	0	0	0	Luisa	Old
E_9	7526	60	48	9	48_9	E	20	9	43531	6	43572	1	18	14	4	4	0	0	0	2		1	0	0	0	Luisa	Old
E_9	7523	60	48	9	48_9	E	20	9	43531	3	43551	1	20	6	2	2	0	0	0	0		1	0	0	0	Jan	Old
E_9	7528	60	48	9	48_9	E	20	9	43531	8	43586	1	23	17	10	10	0	0	0	0		1	0	0	0	Luisa	Old
E_9	7529	60	48	9	48_9	E	20	9	43531	9	43593	1	23	12	9	9	0	0	0	0		1	0	0	0	Luisa	Old
E_9	7530	60	48	9	48_9	E	20	9	43531	10	43600	1	25	23	15	15	0	0	0	0		1	0	0	0	Luisa	Old
E_9	7531	60	48	9	48_9	E	20	9	43531	11	43607	1	24	8	16	16	0	0	0	0		1	0	0	0	Luisa	Old
E_9	7532	60	48	9	48_9	E	20	9	43531	12	43614	1	29	3	20	20	0	0	0	0		1	0	0	0	Luisa	Old
E_9	7533	60	48	9	48_9	E	20	9	43531	13	43621	1	22	3	18	16	2	0	0	0		1	0	0	0	Jan	Old
E_9	7521	60	48	9	48_9	E	20	9	43531	1	43537	0	19	0	1	1	0	0	0	1		1	0	0	0	Jan	Old
E_9	7535	60	48	9	48_9	E	20	9	43531	15	43635	1	26	2	7	7	0	0	0	0		1	0	0	0	Luisa	Old
E_9	7536	60	48	9	48_9	E	20	9	43531	16	43642	1	25	3	2	2	0	0	0	0		1	0	0	0	Luisa	Old
E_9	7537	60	48	9	48_9	E	20	9	43531	17	43649	1	22	0	0	0	0	0	0	0		1	0	0	0	Luisa	Old
E_9	7538	60	48	9	48_9	E	20	9	43531	18	43656	1	20	4	0	0	0	0	0	0		1	0	0	0	Luisa	Old
E_9	7539	60	48	9	48_9	E	20	9	43531	19	43663	1	21	10	0	0	0	0	0	0		1	0	0	0	Luisa	Old
E_9	7527	60	48	9	48_9	E	20	9	43531	7	43579	1	22	14	7	7	0	0	0	0		1	0	0	0	Luisa	Old
E_9	7541	60	48	9	48_9	E	20	9	43531	21	43677	1	20	12	0	0	0	0	0	0		1	0	0	0	Luisa	Old
E_9	7542	60	48	9	48_9	E	20	9	43531	22	43684	1	20	13	5	3	2	0	0	0		1	0	0	0	Luisa	Old
E_9	7543	60	48	9	48_9	E	20	9	43531	23	43691	1	16	16	10	10	0	0	0	2		1	0	0	0	Luisa	Old
E_9	7544	60	48	9	48_9	E	20	9	43531	24	43698	1	21	12	13	13	0	0	0	0		1	0	0	0	Luisa	Old
E_9	7545	60	48	9	48_9	E	20	9	43531	25	43705	1	28	17	15	15	0	0	0	0		1	0	0	0	Luisa	Old
E_9	7546	60	48	9	48_9	E	20	9	43531	26	43712	1	32	17	12	11	0	1	0	0		1	0	0	0	Luisa	Old
E_9	7547	60	48	9	48_9	E	20	9	43531	27	43719	1	30	9	10	6	4	0	0	0		1	0	0	0	Mathi	Old
E_9	7548	60	48	9	48_9	E	20	9	43531	28	43726	1	23	10	9	7	2	0	0	0		1	0	0	0	Luisa	Old
E_9	7549	60	48	9	48_9	E	20	9	43531	29	43733	1	20	6	8	7	0	1	0	0		1	0	0	0	Luisa	Old
E_9	7550	60	48	9	48_9	E	20	9	43531	30	43740	1	25	7	8	6	1	1	0	0		1	0	0	0	Luisa	Old
E_9	7551	60	48	9	48_9	E	20	9	43531	31	43747	1	23	8	9	5	4	0	0	0		1	0	0	0	Luisa	Old
E_9	7552	60	48	9	48_9	E	20	9	43531	32	43754	1	21	9	6	4	2	0	0	0		1	0	0	0	Luisa	Old
E_9	7553	60	48	9	48_9	E	20	9	43531	33	43761	1	20	7	4	1	3	0	0	0		1	0	0	0	Luisa	Old
E_9	7554	60	48	9	48_9	E	20	9	43531	34	43768	1	20	6	3	0	3	0	0	0		1	0	0	0	Luisa	Old
E_9	7555	60	48	9	48_9	E	20	9	43531	35	43775	1	20	5	4	0	4	0	0	0		1	0	0	0	Jan	Old
E_9	7556	60	48	9	48_9	E	20	9	43531	36	43782	1	15	6	3	0	2	1	0	5		1	0	0	0	Luisa	Old
E_9	7557	60	48	9	48_9	E	20	9	43531	37	43789	1	20	5	1	0	1	0	0	0		1	0	0	0	Luisa	Old
E_9	7558	60	48	9	48_9	E	20	9	43531	38	43796	1	18	4	1	0	1	0	0	0		1	0	0	0	Luisa	Old
E_9	7559	60	48	9	48_9	E	20	9	43531	39	43803	1	18	1	0	0	0	0	0	0		1	0	0	0	Luisa	Old
E_9	7560	60	48	9	48_9	E	20	9	43531	40	43810	1	16	0	1	1	0	0	0	0				0	0	Luisa	Old
E_9	7561	60	48	9	48_9	E	20	9	43531	41	43817	1	15	0	0	0	0	0	0	0				0	0	Luisa	Old
E_9	7562	60	48	9	48_9	E	20	9	43531	42	43822	1	15	0	0	0	0	0	0	0				0	0	Luisa	Old
E_9	7540	60	48	9	48_9	E	20	9	43531	20	43670	1	20	10	0	0	0	0	0	0		1	0	0	0	Luisa	Old
E_9	7534	60	48	9	48_9	E	20	9	43531	14	43628	1	30	2	10	10	0	0	0	0		1	0	0	0	Luisa	Old
F_1	6962	60	48	10	48_10	F	10	1	43530	2	43544	1	10	7	6	6	0	0	0	0		1	0	0	0	Jan	Middle
F_1	6963	60	48	10	48_10	F	10	1	43530	3	43551	1	12	10	6	6	0	0	0	0		1	0	0	0	Jan	Middle
F_1	6964	60	48	10	48_10	F	10	1	43530	4	43558	1	18	8	0	0	0	0	0	0		1	0	0	0	Luisa	Middle
F_1	6966	60	48	10	48_10	F	10	1	43530	6	43572	1	9	9	6	6	0	0	0	0		1	0	0	0	Luisa	Middle
F_1	6967	60	48	10	48_10	F	10	1	43530	7	43579	1	11	12	9	9	0	0	0	0		1	0	0	0	Luisa	Middle
F_1	6968	60	48	10	48_10	F	10	1	43530	8	43586	1	15	14	6	6	0	0	0	0		1	0	0	0	Luisa	Middle
F_1	6961	60	48	10	48_10	F	10	1	43530	1	43537	0	10	0	2	2	0	0	0	0		1	0	0	0	Jan	Middle
F_1	6970	60	48	10	48_10	F	10	1	43530	10	43600	1	14	19	9	8	1	0	0	0		1	0	0	0	Luisa	Middle
F_1	6971	60	48	10	48_10	F	10	1	43530	11	43607	1	12	15	10	8	2	0	0	0		1	0	0	0	Luisa	Middle
F_1	6972	60	48	10	48_10	F	10	1	43530	12	43614	1	11	20	7	6	1	0	0	0		1	0	0	0	Luisa	Middle
F_1	6969	60	48	10	48_10	F	10	1	43530	9	43593	1	13	19	9	9	0	0	0	0		1	0	0	0	Luisa	Middle
F_1	6974	60	48	10	48_10	F	10	1	43530	14	43628	1	12	21	15	12	3	0	0	0		1	0	0	0	Luisa	Middle
F_1	6975	60	48	10	48_10	F	10	1	43530	15	43635	1	12	23	16	16	0	0	0	0		1	0	0	0	Luisa	Middle
F_1	6976	60	48	10	48_10	F	10	1	43530	16	43642	1	19	39	17	16	1	0	0	0		1	0	0	0	Luisa	Middle
F_1	6977	60	48	10	48_10	F	10	1	43530	17	43649	1	14	28	17	17	0	0	0	0		1	0	0	0	Luisa	Middle
F_1	6965	60	48	10	48_10	F	10	1	43530	5	43565	1	12	11	1	1	0	0	0	0		1	0	0	0	Luisa	Middle
F_1	6979	60	48	10	48_10	F	10	1	43530	19	43663	1	22	24	27	26	0	1	0	0		1	0	0	0	Luisa	Middle
F_1	6980	60	48	10	48_10	F	10	1	43530	20	43670	1	19	28	23	21	1	1	0	0		1	0	0	0	Luisa	Middle
F_1	6981	60	48	10	48_10	F	10	1	43530	21	43677	1	26	18	21	20	1	0	0	0		1	0	0	0	Luisa	Middle
F_1	6982	60	48	10	48_10	F	10	1	43530	22	43684	1	23	5	21	21	0	0	0	0				0	0	Luisa	Middle
F_1	6983	60	48	10	48_10	F	10	1	43530	23	43691	1	35	0	25	22	3	0	0	0				0	0	Luisa	Middle
F_1	6984	60	48	10	48_10	F	10	1	43530	24	43698	1	40	0	32	30	1	1	0	0				0	0	Luisa	Middle
F_1	6985	60	48	10	48_10	F	10	1	43530	25	43705	1	39	0	24	20	4	0	0	0				0	0	Luisa	Middle
F_1	6973	60	48	10	48_10	F	10	1	43530	13	43621	1	12	17	6	5	1	0	0	0		1	0	0	0	Jan	Middle
F_1	6986	60	48	10	48_10	F	10	1	43530	26	43712	1	47	0	5	5	0	0	0	0				0	0	Luisa	Middle
F_1	6978	60	48	10	48_10	F	10	1	43530	18	43656	1	20	31	28	27	1	0	0	0		1	0	0	0	Luisa	Middle
F_16	6161	60	48	17	48_17	F	10	16	43544	1	43551	0	13	1	4	4	0	0	0	0		1	0	0	0	Julia	Middle
F_16	6162	60	48	17	48_17	F	10	16	43544	2	43558	1	10	4	1	1	0	0	0	0		1	0	0	0	Luisa	Middle
F_16	6165	60	48	17	48_17	F	10	16	43544	5	43579	1	10	4	0	0	0	0	0	0		1	0	0	0	Luisa	Middle
F_16	6166	60	48	17	48_17	F	10	16	43544	6	43586	1	8	7	1	1	0	0	0	2		1	0	0	0	Luisa	Middle
F_16	6163	60	48	17	48_17	F	10	16	43544	3	43565	1	11	5	0	0	0	0	0	0		1	0	0	0	Luisa	Middle
F_16	6168	60	48	17	48_17	F	10	16	43544	8	43600	1	11	3	1	1	0	0	0	0		1	0	0	0	Luisa	Middle
F_16	6169	60	48	17	48_17	F	10	16	43544	9	43607	1	11	5	0	0	0	0	0	0		1	0	0	0	Luisa	Middle
F_16	6170	60	48	17	48_17	F	10	16	43544	10	43614	1	10	5	0	0	0	0	0	0		1	0	0	0	Luisa	Middle
F_16	6167	60	48	17	48_17	F	10	16	43544	7	43593	1	11	5	2	2	0	0	0	0		1	0	0	0	Luisa	Middle
F_16	6172	60	48	17	48_17	F	10	16	43544	12	43628	1	10	6	1	1	0	0	0	0		1	0	0	0	Luisa	Middle
F_16	6173	60	48	17	48_17	F	10	16	43544	13	43635	1	10	8	3	3	0	0	0	0		1	0	0	0	Luisa	Middle
F_16	6174	60	48	17	48_17	F	10	16	43544	14	43642	1	10	5	3	3	0	0	0	0		1	0	0	0	Luisa	Middle
F_16	6175	60	48	17	48_17	F	10	16	43544	15	43649	1	11	8	5	5	0	0	0	0		1	0	0	0	Luisa	Middle
F_16	6176	60	48	17	48_17	F	10	16	43544	16	43656	1	12	7	2	1	0	1	0	0		1	0	0	0	Luisa	Middle
F_16	6164	60	48	17	48_17	F	10	16	43544	4	43572	1	10	2	0	0	0	0	0	0		1	0	0	0	Luisa	Middle
F_16	6178	60	48	17	48_17	F	10	16	43544	18	43670	1	9	6	0	0	0	0	0	0		1	0	0	0	Luisa	Middle
F_16	6179	60	48	17	48_17	F	10	16	43544	19	43677	1	9	6	0	0	0	0	0	0		1	0	0	0	Luisa	Middle
F_16	6180	60	48	17	48_17	F	10	16	43544	20	43684	1	8	2	1	1	0	0	0	0				0	0	Luisa	Middle
F_16	6181	60	48	17	48_17	F	10	16	43544	21	43691	1	7	0	1	1	0	0	0	0				0	0	Luisa	Middle
F_16	6182	60	48	17	48_17	F	10	16	43544	22	43698	1	8	0	2	2	0	0	0	0				0	0	Luisa	Middle
F_16	6183	60	48	17	48_17	F	10	16	43544	23	43705	1	6	0	4	4	0	0	0	0				0	0	Luisa	Middle
F_16	6171	60	48	17	48_17	F	10	16	43544	11	43621	1	10	6	0	0	0	0	0	0		1	0	0	0	Julia	Middle
F_16	6177	60	48	17	48_17	F	10	16	43544	17	43663	1	9	4	1	1	0	0	0	1		1	0	0	0	Luisa	Middle
F_17	9442	63	48	17	48_17	F	10	17	43529	2	43546	1	12	6	3	3	0	0	0	0		1	0	0	0	Jan	Middle
F_17	9443	63	48	17	48_17	F	10	17	43529	3	43553	1	13	7	0	0	0	0	0	0		1	0	0	0	Jan	Middle
F_17	9444	63	48	17	48_17	F	10	17	43529	4	43560	1	14	8	0	0	0	0	0	0		1	0	0	0	Luisa	Middle
F_17	9441	63	48	17	48_17	F	10	17	43529	1	43539	1	11	1	4	4	0	0	0	0		1	0	0	0	Jan	Middle
F_17	9446	63	48	17	48_17	F	10	17	43529	6	43574	1	10	12	4	4	0	0	0	0		1	0	0	0	Luisa	Middle
F_17	9447	63	48	17	48_17	F	10	17	43529	7	43581	1	9	19	9	9	0	0	0	0		1	0	0	0	Luisa	Middle
F_17	9448	63	48	17	48_17	F	10	17	43529	8	43588	1	14	20	5	5	0	0	0	0		1	0	0	0	Luisa	Middle
F_17	9445	63	48	17	48_17	F	10	17	43529	5	43567	1	9	9	0	0	0	0	0	1		1	0	0	0	Luisa	Middle
F_17	9450	63	48	17	48_17	F	10	17	43529	10	43602	1	11	18	8	8	0	0	0	0		1	0	0	0	Luisa	Middle
F_17	9451	63	48	17	48_17	F	10	17	43529	11	43609	1	12	25	11	11	0	0	0	0		1	0	0	0	Luisa	Middle
F_17	9452	63	48	17	48_17	F	10	17	43529	12	43616	1	12	22	13	12	0	1	0	0		1	0	0	0	Luisa	Middle
F_17	9449	63	48	17	48_17	F	10	17	43529	9	43595	1	12	16	3	3	0	0	0	0		1	0	0	0	Luisa	Middle
F_17	9454	63	48	17	48_17	F	10	17	43529	14	43630	1	18	41	30	28	2	0	0	0		1	0	0	0	Luisa	Middle
F_17	9455	63	48	17	48_17	F	10	17	43529	15	43637	1	23	38	37	33	3	1	0	0		1	0	0	0	Luisa	Middle
F_17	9456	63	48	17	48_17	F	10	17	43529	16	43644	1	20	49	44	42	2	0	0	0		1	0	0	0	Luisa	Middle
F_17	9457	63	48	17	48_17	F	10	17	43529	17	43651	1	25	38	44	39	3	2	0	0		1	0	0	0	Luisa	Middle
F_17	9458	63	48	17	48_17	F	10	17	43529	18	43658	1	29	42	30	23	4	3	0	0		1	0	0	0	Luisa	Middle
F_17	9459	63	48	17	48_17	F	10	17	43529	19	43665	1	32	33	39	38	1	0	0	0		1	0	0	0	Luisa	Middle
F_17	9460	63	48	17	48_17	F	10	17	43529	20	43672	1	26	19	36	32	4	0	0	0		1	0	0	0	Luisa	Middle
F_17	9461	63	48	17	48_17	F	10	17	43529	21	43679	1	28	18	38	35	2	1	0	0		1	0	0	0	Luisa	Middle
F_17	9462	63	48	17	48_17	F	10	17	43529	22	43686	1	39	2	46	44	2	0	0	0				0	0	Luisa	Middle
F_17	9463	63	48	17	48_17	F	10	17	43529	23	43693	1	51	0	44	43	1	0	0	0				0	0	Luisa	Middle
F_17	9464	63	48	17	48_17	F	10	17	43529	24	43700	1	88	0	41	37	4	0	0	0				0	0	Luisa	Middle
F_17	9465	63	48	17	48_17	F	10	17	43529	25	43707	1	86	0	40	40	0	0	0	0				0	0	Luisa	Middle
F_17	9453	63	48	17	48_17	F	10	17	43529	13	43623	1	14	38	15	13	1	1	0	0		1	0	0	0	Jan	Middle
F_6	6241	60	48	11	48_11	F	10	6	43490	1	43495	0	10	0	0	0	0	0	0	0		1	0	0	0	Luisa	Old
F_6	6243	60	48	11	48_11	F	10	6	43490	3	43509	1	10	5	7	7	0	0	0	0		1	0	0	0	Luisa	Old
F_6	6245	60	48	11	48_11	F	10	6	43490	5	43523	1	12	8	1	1	0	0	0	0		1	0	0	0	Luisa	Old
F_6	6246	60	48	11	48_11	F	10	6	43490	6	43530	1	11	11	2	2	0	0	0	0		1	0	0	0	Luisa	Old
F_6	6247	60	48	11	48_11	F	10	6	43490	7	43537	1	10	13	10	10	0	0	0	0		1	0	0	0	Jan	Old
F_6	6244	60	48	11	48_11	F	10	6	43490	4	43516	1	15	7	3	3	0	0	0	0		1	0	0	0	Luisa	Old
F_6	6249	60	48	11	48_11	F	10	6	43490	9	43551	1	14	20	17	17	0	0	0	0		1	0	0	0	Jan	Old
F_6	6250	60	48	11	48_11	F	10	6	43490	10	43558	1	20	29	19	19	0	0	0	0		1	0	0	0	Luisa	Old
F_6	6251	60	48	11	48_11	F	10	6	43490	11	43565	1	23	18	23	19	3	1	0	0		1	0	0	0	Luisa	Old
F_6	6252	60	48	11	48_11	F	10	6	43490	12	43572	1	23	25	27	24	3	0	0	0		1	0	0	0	Luisa	Old
F_6	6253	60	48	11	48_11	F	10	6	43490	13	43579	1	17	30	44	36	6	2	0	0		1	0	0	0	Luisa	Old
F_6	6254	60	48	11	48_11	F	10	6	43490	14	43586	1	25	44	36	36	0	0	0	0		1	0	0	0	Luisa	Old
F_6	6242	60	48	11	48_11	F	10	6	43490	2	43502	0	12	0	5	5	0	0	0	0		1	0	0	0	Luisa	Old
F_6	6256	60	48	11	48_11	F	10	6	43490	16	43600	1	24	38	43	38	3	2	0	0		1	0	0	0	Luisa	Old
F_6	6257	60	48	11	48_11	F	10	6	43490	17	43607	1	27	39	53	49	4	0	0	0		1	0	0	0	Luisa	Old
F_6	6258	60	48	11	48_11	F	10	6	43490	18	43614	1	29	40	61	55	4	2	0	0		1	0	0	0	Luisa	Old
F_6	6259	60	48	11	48_11	F	10	6	43490	19	43621	1	50	36	80	74	5	1	0	0		1	0	0	0	Jan	Old
F_6	6260	60	48	11	48_11	F	10	6	43490	20	43628	1	43	50	59	59	0	0	0	0		1	0	0	0	Luisa	Old
F_6	6248	60	48	11	48_11	F	10	6	43490	8	43544	1	12	12	10	10	0	0	0	0		1	0	0	0	Jan	Old
F_6	6262	60	48	11	48_11	F	10	6	43490	22	43642	1	37	30	67	54	9	4	0	0		1	0	0	0	Luisa	Old
F_6	6263	60	48	11	48_11	F	10	6	43490	23	43649	1	48	20	54	48	6	0	0	0		1	0	0	0	Luisa	Old
F_6	6264	60	48	11	48_11	F	10	6	43490	24	43656	1	40	22	66	52	11	3	0	0		1	0	0	0	Luisa	Old
F_6	6265	60	48	11	48_11	F	10	6	43490	25	43663	1	45	26	78	71	7	0	0	0		1	0	0	0	Luisa	Old
F_6	6266	60	48	11	48_11	F	10	6	43490	26	43670	1	49	31	61	50	9	2	0	0		1	0	0	0	Luisa	Old
F_6	6267	60	48	11	48_11	F	10	6	43490	27	43677	1	37	25	51	44	3	4	0	0		1	0	0	0	Luisa	Old
F_6	6255	60	48	11	48_11	F	10	6	43490	15	43593	1	39	28	35	31	4	0	0	0		1	0	0	0	Luisa	Old
F_6	6269	60	48	11	48_11	F	10	6	43490	29	43691	1	36	10	32	21	7	4	0	0		1	0	0	0	Luisa	Old
F_6	6270	60	48	11	48_11	F	10	6	43490	30	43698	1	15	18	37	24	12	1	0	0		1	0	0	0	Luisa	Old
F_6	6271	60	48	11	48_11	F	10	6	43490	31	43705	1	31	26	35	31	4	0	0	0		1	0	0	0	Luisa	Old
F_6	6272	60	48	11	48_11	F	10	6	43490	32	43712	1	25	19	34	33	0	1	0	0		1	0	0	0	Luisa	Old
F_6	6273	60	48	11	48_11	F	10	6	43490	33	43719	1	31	10	27	15	1	11	0	0		1	0	0	0	Mathi	Old
F_6	6261	60	48	11	48_11	F	10	6	43490	21	43635	1	50	35	85	73	7	5	0	0		1	0	0	0	Luisa	Old
F_6	6275	60	48	11	48_11	F	10	6	43490	35	43733	1	17	19	26	3	12	11	0	0		1	0	0	0	Luisa	Old
F_6	6276	60	48	11	48_11	F	10	6	43490	36	43740	1	12	23	6	2	2	2	0	0		1	0	0	0	Luisa	Old
F_6	6277	60	48	11	48_11	F	10	6	43490	37	43747	1	13	2	9	4	0	5	1	0		1	0	0	0	Luisa	Old
F_6	6278	60	48	11	48_11	F	10	6	43490	38	43754	1	14	5	8	2	1	5	0	0		1	0	0	0	Luisa	Old
F_6	6279	60	48	11	48_11	F	10	6	43490	39	43761	1	11	6	5	0	0	5	0	0		1	0	0	0	Luisa	Old
F_6	6280	60	48	11	48_11	F	10	6	43490	40	43768	1	10	2	0	0	0	0	0	0		1	0	0	0	Luisa	Old
F_6	6281	60	48	11	48_11	F	10	6	43490	41	43775	1	10	2	0	0	0	0	0	0		1	0	0	0	Jan	Old
F_6	6282	60	48	11	48_11	F	10	6	43490	42	43782	1	11	2	0	0	0	0	0	0		1	0	0	0	Luisa	Old
F_6	6283	60	48	11	48_11	F	10	6	43490	43	43789	1	9	4	0	0	0	0	0	0		1	0	0	0	Luisa	Old
F_6	6274	60	48	11	48_11	F	10	6	43490	34	43726	1	19	10	29	7	5	17	0	0		1	0	0	0	Luisa	Old
F_6	6268	60	48	11	48_11	F	10	6	43490	28	43684	1	36	12	53	36	13	4	0	0		1	0	0	0	Luisa	Old
