# Supplementary material for: Late-life fitness gains and reproductive death in Cardiocondyla obscurior ants
Source: eLife. 2022 Apr 6;11:e74695. doi: 10.7554/eLife.74695 (PMC8986319; doi:10.7554/eLife.74695)
Supplement: Source data 7. [file elife-74695-data7.xlsx]

## Sheet: Sheet1
Source Data 7 – Queen’s survival probability estimation across time.
Week	Nalive	n.deads	survival	std.err	lower95_CI	upper95_CI
8	99	1	0.9899	0.0100	0.97040	10000
9	98	1	0.9798	0.0141	0.95247	10000
10	97	2	0.9596	0.0198	0.92158	0.9992
11	95	2	0.9394	0.0240	0.89355	0.9876
12	93	2	0.9192	0.0274	0.86704	0.9745
13	91	3	0.8889	0.0316	0.82909	0.9530
14	88	2	0.8687	0.0339	0.80464	0.9378
15	86	2	0.8485	0.0360	0.78072	0.9221
16	84	1	0.8384	0.0370	0.76892	0.9141
18	83	4	0.7980	0.0404	0.72268	0.8811
19	79	1	0.7879	0.0411	0.71133	0.8727
20	78	2	0.7677	0.0424	0.68884	0.8555
21	76	3	0.7374	0.0442	0.65559	0.8294
22	73	5	0.6869	0.0466	0.60133	0.7846
23	68	3	0.6566	0.0477	0.56938	0.7571
24	65	6	0.5960	0.0493	0.50673	0.7009
25	59	4	0.5556	0.0499	0.46581	0.6626
26	55	6	0.4949	0.0502	0.40564	0.6039
27	49	3	0.4646	0.0501	0.37609	0.5741
28	46	1	0.4545	0.0500	0.36632	0.5640
29	45	4	0.4141	0.0495	0.32764	0.5235
30	41	6	0.3535	0.0480	0.27086	0.4614
31	35	6	0.2929	0.0457	0.21570	0.3978
32	29	5	0.2424	0.0431	0.17114	0.3434
33	24	2	0.2222	0.0418	0.15372	0.3212
34	22	7	0.1515	0.0360	0.09506	0.2415
35	15	4	0.1111	0.0316	0.06365	0.1940
36	11	2	0.0909	0.0289	0.04876	0.1695
37	9	2	0.0707	0.0258	0.03462	0.1444
38	7	4	0.0303	0.0172	0.00994	0.0923
39	3	2	0.0101	0.0100	0.00144	0.0710
43	1	1	0.0000	NaN	NA	NA
