# Supplementary material for: Late-life fitness gains and reproductive death in Cardiocondyla obscurior ants
Source: eLife. 2022 Apr 6;11:e74695. doi: 10.7554/eLife.74695 (PMC8986319; doi:10.7554/eLife.74695)
Supplement: Source data 8. [file elife-74695-data8.xlsx]

## Sheet: Tabelle1
Colony	Replicate	Checkup Nr	Setup-Date	Date	Surv Days	Status	Focal W	Total	Queens	Worker	Larvae	Q Pupae	Dead	Pupa/Eclosed	From Box	Number
10	1	1	2020-07-23	2020-07-28		0	1	11	2	8	2	0	2	E	18	8
10	1	2	2020-07-23	2020-08-04		0	1	12	2	9	5	0	1		18	8
10	1	3	2020-07-23	2020-08-07		0	1	12	2	9	4	0	0		18	8
10	1	4	2020-07-23	2020-08-11		0	1	12	2	9	14	0	0		18	8
10	1	5	2020-07-23	2020-08-14		0	1	13	2	10	10	0	0		18	8
10	1	6	2020-07-23	2020-08-18		0	1	12	2	9	9	0	1		18	8
10	1	7	2020-07-23	2020-08-21		0	1	13	2	10	6	0	0		18	8
10	1	8	2020-07-23	2020-08-25		0	1	12	2	9	8	0	1		18	8
10	1	9	2020-07-23	2020-08-28		0	1	12	2	9	5	1	1		18	8
10	1	10	2020-07-23	2020-09-01		0	1	11	2	8	8	0	1		18	8
10	1	11	2020-07-23	2020-09-04		0	1	12	2	9	13	0	1		18	8
10	1	12	2020-07-23	2020-09-08		0	1	12	2	9	18	0	0		18	8
10	1	13	2020-07-23	2020-09-11		0	1	12	2	9	6	0	1		18	8
10	1	14	2020-07-23	2020-09-15		0	1	11	2	9	5	0	0		18	8
10	1	15	2020-07-23	2020-09-18		0	1	13	2	10	4	0	0		18	8
10	1	16	2020-07-23	2020-09-22		0	1	12	2	9	8	0	1		18	8
10	1	17	2020-07-23	2020-09-25		0	1	12	2	9	10	0	1		18	8
10	1	18	2020-07-23	2020-09-29		0	1	9	2	6	12	0	3		18	8
10	1	19	2020-07-23	2020-10-02		0	1	12	2	9	15	0	1		18	8
10	1	20	2020-07-23	2020-10-06		0	1	13	2	10	14	0	0		18	8
10	1	21	2020-07-23	2020-10-09		0	1	12	2	9	10	0	1		18	8
10	1	22	2020-07-23	2020-10-13		0	1	10	2	7	11	0	2		18	8
10	1	23	2020-07-23	2020-10-16		0	1	13	2	10	9	0	0		18	8
10	1	24	2020-07-23	2020-10-20		0	1	11	2	8	7	0	2		18	8
10	1	25	2020-07-23	2020-10-23		0	1	13	2	10	9	0	0		18	8
10	1	26	2020-07-23	2020-10-27		0	1	13	2	10	10	0	0		18	8
10	1	27	2020-07-23	2020-10-30		1	0	10	2	8	12	0	3		18	8
10	2	1	2020-07-21	2020-07-28		0	1	10	2	7	3	0	3	P	18	11
10	2	2	2020-07-21	2020-08-04		0	1	10	2	7	3	0	3	E	18	11
10	2	3	2020-07-21	2020-08-07		0	1	13	2	10	6	0	0		18	11
10	2	4	2020-07-21	2020-08-11		0	1	11	2	8	6	0	2		18	11
10	2	5	2020-07-21	2020-08-14		0	1	13	2	10	6	0	0		18	11
10	2	6	2020-07-21	2020-08-18		0	1	12	2	9	9	0	1		18	11
10	2	7	2020-07-21	2020-08-21		0	1	12	2	9	8	0	1		18	11
10	2	8	2020-07-21	2020-08-25		0	1	12	2	9	12	0	0		18	11
10	2	9	2020-07-21	2020-08-28		0	1	11	2	8	6	0	2		18	11
10	2	10	2020-07-21	2020-09-01		0	1	11	2	8	4	1	0		18	11
10	2	11	2020-07-21	2020-09-04		0	1	10	2	7	4	0	3		18	11
10	2	12	2020-07-21	2020-09-08		0	1	10	2	7	6	0	0		18	11
10	2	13	2020-07-21	2020-09-11		0	1	7	2	4	6	0	6		18	11
10	2	14	2020-07-21	2020-09-15		0	1	7	2	4	8	0	0		18	11	4 pupae added from 18.6+18.1
10	2	15	2020-07-21	2020-09-18		0	1	9	1	7	4	0	3		18	11
10	2	16	2020-07-21	2020-09-22		0	1	9	1	7	5	0	0		18	11	3 pupae from 18.8
10	2	17	2020-07-21	2020-09-25		0	1	10	1	8	5	0	2		18	11
10	2	18	2020-07-21	2020-09-29		0	1	8	1	6	8	0	2		18	11
10	2	19	2020-07-21	2020-10-02		0	1	11	1	9	7	0	1		18	11
10	2	20	2020-07-21	2020-10-06		0	1	8	1	6	10	0	3		18	11
10	2	21	2020-07-21	2020-10-09		0	1	11	1	10	8	0	1		18	11
10	2	22	2020-07-21	2020-10-13		1	0	11	1	9	12	0	1		18	11
10	3	1	2020-07-21	2020-07-28		0	1	13	2	10	0	0	0	P	18	12
10	3	2	2020-07-21	2020-08-04		0	1	11	2	8	12	0	2	E	18	12
10	3	3	2020-07-21	2020-08-07		0	1	12	2	9	7	0	1		18	12
10	3	4	2020-07-21	2020-08-11		0	1	12	2	9	8	0	0		18	12
10	3	5	2020-07-21	2020-08-14		0	1	12	2	9	5	0	1		18	12
10	3	6	2020-07-21	2020-08-18		0	1	12	2	9	5	0	0		18	12
10	3	7	2020-07-21	2020-08-21		0	1	12	2	9	3	0	1		18	12
10	3	8	2020-07-21	2020-08-25		0	1	12	2	9	5	0	0		18	12
10	3	9	2020-07-21	2020-08-28		0	1	12	2	9	5	0	1		18	12
10	3	10	2020-07-21	2020-09-01		0	1	12	2	9	3	0	0		18	12
10	3	11	2020-07-21	2020-09-04		0	1	12	2	9	4	0	1		18	12
10	3	12	2020-07-21	2020-09-08		0	1	12	2	9	5	0	0		18	12
10	3	13	2020-07-21	2020-09-11		0	1	13	2	10	4	0	0		18	12
10	3	14	2020-07-21	2020-09-15		0	1	12	1	10	3	0	0		18	12
10	3	15	2020-07-21	2020-09-18		0	1	12	2	9	6	0	1		18	12
10	3	16	2020-07-21	2020-09-22		0	1	12	2	9	10	0	0		18	12
10	3	17	2020-07-21	2020-09-25		0	1	12	2	9	8	0	1		18	12
10	3	18	2020-07-21	2020-09-29		0	1	12	2	9	8	0	0		18	12
10	3	19	2020-07-21	2020-10-02		0	1	12	2	9	11	0	0		18	12
10	3	20	2020-07-21	2020-10-06		0	1	11	2	8	12	0	1		18	12
10	3	21	2020-07-21	2020-10-09		0	1	13	2	10	10	0	0		18	12
10	3	22	2020-07-21	2020-10-13		0	1	13	2	10	10	0	0		18	12
10	3	23	2020-07-21	2020-10-16		0	1	13	2	10	8	0	0		18	12
10	3	24	2020-07-21	2020-10-20		0	1	12	2	9	9	0	1		18	12
10	3	25	2020-07-21	2020-10-23		0	1	13	2	10	5	0	0		18	12
10	3	26	2020-07-21	2020-10-27		1	0	11	2	9	10	0	1		18	12
10	4	1	2020-07-21	2020-07-28		0	1	9	2	6	3	0	4	P	18	6
10	4	2	2020-07-21	2020-08-04		0	1	11	1	9	2	0	2	E	18	6
10	4	3	2020-07-21	2020-08-07		0	1	11	2	8	5	0	2		18	6
10	4	4	2020-07-21	2020-08-11		0	1	11	2	8	3	0	0		18	6
10	4	5	2020-07-21	2020-08-14		0	1	10	1	8	0	0	3		18	6
10	4	6	2020-07-21	2020-08-18		0	1	10	1	8	2	0	0		18	6
10	4	7	2020-07-21	2020-08-21		0	1	13	2	10	3	0	0		18	6
10	4	8	2020-07-21	2020-08-25		0	1	12	2	9	8	0	1		18	6
10	4	9	2020-07-21	2020-08-28		0	1	13	2	10	6	0	0		18	6
10	4	10	2020-07-21	2020-09-01		0	1	11	2	8	6	0	2		18	6
10	4	11	2020-07-21	2020-09-04		0	1	13	2	10	4	0	0		18	6
10	4	12	2020-07-21	2020-09-08		0	1	12	2	9	5	0	1		18	6
10	4	13	2020-07-21	2020-09-11		0	1	11	2	8	8	0	2		18	6
10	4	14	2020-07-21	2020-09-15		0	1	10	1	8	9	0	0		18	6
10	4	15	2020-07-21	2020-09-18		0	1	13	2	10	12	0	0		18	6
10	4	16	2020-07-21	2020-09-22		0	1	13	2	10	13	0	0		18	6
10	4	17	2020-07-21	2020-09-25		0	1	13	2	10	6	0	0		18	6
10	4	18	2020-07-21	2020-09-29		0	1	13	2	10	15	0	0		18	6
10	4	19	2020-07-21	2020-10-02		0	1	13	2	10	10	0	0		18	6
10	4	20	2020-07-21	2020-10-06		0	1	11	2	8	12	0	2		18	6
10	4	21	2020-07-21	2020-10-09		0	1	13	2	10	9	0	0		18	6
10	4	22	2020-07-21	2020-10-13		0	1	12	2	9	16	0	1		18	6
10	4	23	2020-07-21	2020-10-16		0	1	12	2	9	14	0	0		18	6
10	4	24	2020-07-21	2020-10-20		0	1	11	2	8	15	0	1		18	6
10	4	25	2020-07-21	2020-10-23		0	1	12	2	9	11	0	2		18	6
10	4	26	2020-07-21	2020-10-27		0	1	13	2	10	12	0	0		18	6
10	4	27	2020-07-21	2020-10-30		0	1	13	2	10	11	0	0		18	6
10	4	28	2020-07-21	2020-11-03		0	1	12	2	9	13	0	1		18	6
10	4	29	2020-07-21	2020-11-06		0	1	12	2	9	5	1	1		18	6
10	4	30	2020-07-21	2020-11-10		0	1	11	2	8	4	1	0		18	6
10	4	31	2020-07-21	2020-11-13		0	1	13	2	10	4	0	0		18	6
10	4	32	2020-07-21	2020-11-17		0	1	10	1	8	3	0	3		18	6
10	4	33	2020-07-21	2020-11-20		0	1	13	2	10	3	0	0		18	6
10	4	34	2020-07-21	2020-11-24		0	1	13	2	10	3	0	0		18	6
10	4	35	2020-07-21	2020-11-27		1	0	12	2	10	3	0	0		18	6
10	5	1	2020-07-22	2020-07-28		0	1	12	2	9	4	0	1	E	18	4
10	5	2	2020-07-22	2020-08-04		0	1	9	2	6	5	1	4		18	4
10	5	3	2020-07-22	2020-08-07		0	1	13	2	10	6	0	0		18	4
10	5	4	2020-07-22	2020-08-11		0	1	9	2	6	7	0	4		18	4
10	5	5	2020-07-22	2020-08-14		0	1	13	2	10	15	0	0		18	4
10	5	6	2020-07-22	2020-08-18		0	1	13	2	10	12	1	0		18	4
10	5	7	2020-07-22	2020-08-21		0	1	13	2	10	7	0	0		18	4
10	5	8	2020-07-22	2020-08-25		0	1	13	2	10	10	0	0		18	4
10	5	9	2020-07-22	2020-08-28		0	1	11	2	8	6	0	2		18	4
10	5	10	2020-07-22	2020-09-01		0	1	10	1	8	5	0	1		18	4
10	5	11	2020-07-22	2020-09-04		0	1	12	2	9	5	0	1		18	4
10	5	12	2020-07-22	2020-09-08		0	1	10	2	7	7	0	2		18	4
10	5	13	2020-07-22	2020-09-11		0	1	10	2	7	12	0	3		18	4
10	5	14	2020-07-22	2020-09-15		0	1	10	2	7	17	0	0		18	4
10	5	15	2020-07-22	2020-09-18		0	1	13	2	10	10	0	0		18	4
10	5	16	2020-07-22	2020-09-22		0	1	13	2	10	10	0	0		18	4
10	5	17	2020-07-22	2020-09-25		0	1	13	2	10	12	0	0		18	4
10	5	18	2020-07-22	2020-09-29		0	1	13	2	10	24	0	0		18	4
10	5	19	2020-07-22	2020-10-02		0	1	13	2	10	14	0	0		18	4
10	5	20	2020-07-22	2020-10-06		0	1	12	2	9	20	0	1		18	4
10	5	21	2020-07-22	2020-10-09		0	1	12	2	10	11	0	0		18	4
10	5	22	2020-07-22	2020-10-13		0	1	13	2	10	20	1	0		18	4
10	5	23	2020-07-22	2020-10-16		0	1	12	2	9	10	0	1		18	4
10	5	24	2020-07-22	2020-10-20		0	1	11	2	8	14	0	1		18	4
10	5	25	2020-07-22	2020-10-23		0	1	13	2	10	11	0	0		18	4
10	5	26	2020-07-22	2020-10-27		0	1	13	2	10	13	0	0		18	4
10	5	27	2020-07-22	2020-10-30		0	1	12	2	9	12	0	1		18	4
10	5	28	2020-07-22	2020-11-03		0	1	11	2	8	13	0	0		18	4
10	5	29	2020-07-22	2020-11-06		0	1	13	2	10	10	0	0		18	4
10	5	30	2020-07-22	2020-11-10		0	1	12	2	9	18	1	1		18	4
10	5	31	2020-07-22	2020-11-13		0	1	12	2	9	7	0	1		18	4
10	5	32	2020-07-22	2020-11-17		1	0	8	2	6	8	0	5		18	4
10	6	1	2020-07-22	2020-07-28		0	1	13	2	10	3	0	0	E	18	5
10	6	2	2020-07-22	2020-08-04		0	1	10	2	7	2	1	3		18	5
10	6	3	2020-07-22	2020-08-07		0	1	11	2	8	5	0	2		18	5
10	6	4	2020-07-22	2020-08-11		0	1	10	2	7	10	0	1		18	5
10	6	5	2020-07-22	2020-08-14		0	1	9	2	6	11	0	4		18	5
10	6	6	2020-07-22	2020-08-18		0	1	8	2	5	12	1	1		18	5
10	6	7	2020-07-22	2020-08-21		0	1	11	2	8	10	0	2		18	5
10	6	8	2020-07-22	2020-08-25		0	1	10	2	7	14	0	1		18	5
10	6	9	2020-07-22	2020-08-28		0	1	11	2	8	14	1	2		18	5
10	6	10	2020-07-22	2020-09-01		0	1	11	2	8	16	3	0		18	5
10	6	11	2020-07-22	2020-09-04		0	1	10	2	7	6	0	3		18	5
10	6	12	2020-07-22	2020-09-08		0	1	10	2	7	6	0	0		18	5
10	6	13	2020-07-22	2020-09-11		0	1	7	2	4	5	0	6		18	5
10	6	14	2020-07-22	2020-09-15		0	1	7	2	4	6	0	0		18	5
10	6	15	2020-07-22	2020-09-18		0	1	11	2	8	6	0	2		18	5
10	6	16	2020-07-22	2020-09-22		0	1	10	2	7	13	0	1		18	5
10	6	17	2020-07-22	2020-09-25		0	1	11	2	8	9	0	0		18	5
10	6	18	2020-07-22	2020-09-29		0	1	10	2	7	10	0	1		18	5
10	6	19	2020-07-22	2020-10-02		0	1	9	2	6	5	0	1		18	5
10	6	20	2020-07-22	2020-10-06		0	1	9	2	6	9	0	0		18	5
10	6	21	2020-07-22	2020-10-09		0	1	13	2	10	7	0	0		18	5
10	6	22	2020-07-22	2020-10-13		0	1	12	2	9	7	0	1		18	5
10	6	23	2020-07-22	2020-10-16		1	0	11	2	9	6	0	1		18	5
10	7	1	2020-07-23	2020-07-28		0	1	13	2	10	2	0	0	E	18	3
10	7	2	2020-07-23	2020-08-04		0	1	12	2	9	5	0	1		18	3
10	7	3	2020-07-23	2020-08-07		0	1	12	2	9	8	0	1		18	3
10	7	4	2020-07-23	2020-08-11		0	1	10	1	8	15	1	2		18	3
10	7	5	2020-07-23	2020-08-14		0	1	13	2	10	10	0	0		18	3
10	7	6	2020-07-23	2020-08-18		0	1	13	2	10	7	0	0		18	3
10	7	7	2020-07-23	2020-08-21		0	1	13	2	10	6	0	0		18	3
10	7	8	2020-07-23	2020-08-25		0	1	12	2	9	10	0	1		18	3
10	7	9	2020-07-23	2020-08-28		0	1	12	2	9	8	0	1		18	3
10	7	10	2020-07-23	2020-09-01		0	1	11	2	8	9	0	1		18	3
10	7	11	2020-07-23	2020-09-04		0	1	13	2	10	8	0	0		18	3
10	7	12	2020-07-23	2020-09-08		0	1	11	2	8	7	0	2		18	3
10	7	13	2020-07-23	2020-09-11		0	1	13	2	10	9	0	0		18	3
10	7	14	2020-07-23	2020-09-15		0	1	13	2	10	12	0	0		18	3
10	7	15	2020-07-23	2020-09-18		0	1	11	2	8	7	0	2		18	3
10	7	16	2020-07-23	2020-09-22		0	1	9	2	7	9	0	1		18	3
10	7	17	2020-07-23	2020-09-25		0	1	13	2	10	5	1	0		18	3
10	7	18	2020-07-23	2020-09-29		0	1	13	2	10	8	0	0		18	3
10	7	19	2020-07-23	2020-10-02		0	1	13	2	10	8	0	0		18	3
10	7	20	2020-07-23	2020-10-06		0	1	13	2	10	14	0	0		18	3
10	7	21	2020-07-23	2020-10-09		0	1	13	2	10	8	0	0		18	3
10	7	22	2020-07-23	2020-10-13		0	1	12	2	9	11	0	1		18	3
10	7	23	2020-07-23	2020-10-16		0	1	12	2	9	8	0	0		18	3
10	7	24	2020-07-23	2020-10-20		0	1	12	2	9	13	0	0		18	3
10	7	25	2020-07-23	2020-10-23		0	1	12	2	9	8	0	0		18	3
10	7	26	2020-07-23	2020-10-27		0	1	10	1	8	7	0	1		18	3
10	7	27	2020-07-23	2020-10-30		0	1	12	1	10	9	0	0		18	3
10	7	28	2020-07-23	2020-11-03		0	1	12	1	10	7	0	0		18	3
10	7	29	2020-07-23	2020-11-06		0	1	13	2	10	7	0	0		18	3
10	7	30	2020-07-23	2020-11-10		0	1	12	2	9	8	0	0		18	3
10	7	31	2020-07-23	2020-11-13		0	1	13	2	10	7	0	0		18	3
10	7	32	2020-07-23	2020-11-17		0	1	12	2	9	5	0	1		18	3
10	7	33	2020-07-23	2020-11-20		1	0	11	2	9	6	0	2		18	3
10	8	1	2020-07-22	2020-07-28		0	1	11	2	8	4	0	2	P	34	22
10	8	2	2020-07-22	2020-08-04		0	1	12	2	9	5	0	1	E	34	22
10	8	3	2020-07-22	2020-08-07		0	1	12	2	9	4	0	1		34	22
10	8	4	2020-07-22	2020-08-11		0	1	12	2	9	2	0	0		34	22
10	8	5	2020-07-22	2020-08-14		0	1	13	2	10	4	0	0		34	22
10	8	6	2020-07-22	2020-08-18		0	1	12	1	10	6	0	1		34	22
10	8	7	2020-07-22	2020-08-21		0	1	10	1	8	6	0	3		34	22
10	8	8	2020-07-22	2020-08-25		0	1	9	1	6	9	0	1		34	22
10	8	9	2020-07-22	2020-08-28		0	1	12	1	10	10	0	1		34	22
10	8	10	2020-07-22	2020-09-01		0	1	12	1	10	13	0	0		34	22
10	8	11	2020-07-22	2020-09-04		0	1	13	2	10	5	0	0		34	22
10	8	12	2020-07-22	2020-09-08		0	1	12	2	9	10	0	1		34	22
10	8	13	2020-07-22	2020-09-11		0	1	9	2	7	6	0	4		34	22
10	8	14	2020-07-22	2020-09-15		0	1	10	2	7	15	0	0		34	22
10	8	15	2020-07-22	2020-09-18		0	1	13	2	10	10	0	0		34	22
10	8	16	2020-07-22	2020-09-22		0	1	12	2	9	20	0	1		34	22
10	8	17	2020-07-22	2020-09-25		0	1	13	2	9	17	0	1		34	22
10	8	18	2020-07-22	2020-09-29		0	1	11	2	8	28	0	1		34	22
10	8	19	2020-07-22	2020-10-02		0	1	12	2	9	15	0	1		34	22
10	8	20	2020-07-22	2020-10-06		0	1	12	2	9	24	0	0		34	22
10	8	21	2020-07-22	2020-10-09		0	1	12	2	9	19	0	1		34	22
10	8	22	2020-07-22	2020-10-13		0	1	12	2	9	25	0	0		34	22
10	8	23	2020-07-22	2020-10-16		0	1	12	2	9	9	0	0		34	22
10	8	24	2020-07-22	2020-10-20		0	1	11	2	8	20	0	1		34	22
10	8	25	2020-07-22	2020-10-23		0	1	11	2	8	14	0	2		34	22
10	8	26	2020-07-22	2020-10-27		1	0	10	2	8	22	0	0		34	22
10	9	1	2020-07-24	2020-07-28		0	1	13	2	10	4	0	0	E	34	21
10	9	2	2020-07-24	2020-08-04		0	1	12	2	9	4	1	1		34	21
10	9	3	2020-07-24	2020-08-07		0	1	11	2	8	6	0	2		34	21
10	9	4	2020-07-24	2020-08-11		0	1	10	2	7	15	0	1		34	21
10	9	5	2020-07-24	2020-08-14		0	1	11	2	8	14	0	2		34	21
10	9	6	2020-07-24	2020-08-18		0	1	10	2	7	14	0	1		34	21
10	9	7	2020-07-24	2020-08-21		0	1	9	2	6	11	0	4		34	21
10	9	8	2020-07-24	2020-08-25		0	1	9	2	6	14	0	0		34	21
10	9	9	2020-07-24	2020-08-28		0	1	10	2	7	9	0	3		34	21
10	9	10	2020-07-24	2020-09-01		0	1	9	2	6	10	0	1		34	21
10	9	11	2020-07-24	2020-09-04		0	1	10	2	7	6	0	3		34	21
10	9	12	2020-07-24	2020-09-08		0	1	10	2	7	5	0	0		34	21
10	9	13	2020-07-24	2020-09-11		0	1	10	2	7	17	0	3		34	21
10	9	14	2020-07-24	2020-09-15		0	1	9	2	6	18	0	1		34	21
10	9	15	2020-07-24	2020-09-18		0	1	11	2	8	13	0	2		34	21
10	9	16	2020-07-24	2020-09-22		0	1	9	2	6	17	0	2		34	21	4 from 34.10
10	9	17	2020-07-24	2020-09-25		0	1	12	2	9	8	0	1		34	21
10	9	18	2020-07-24	2020-09-29		0	1	12	2	9	10	0	0		34	21
10	9	19	2020-07-24	2020-10-02		0	1	11	2	8	6	0	1		34	21
10	9	20	2020-07-24	2020-10-06		0	1	10	1	8	11	0	1		34	21
10	9	21	2020-07-24	2020-10-09		0	1	12	1	10	8	0	1		34	21
10	9	22	2020-07-24	2020-10-13		1	0	10	1	9	8	0	1		34	21
10	10	1	2020-07-23	2020-07-28		0	1	11	2	8	5	0	2	P	34	8
10	10	2	2020-07-23	2020-08-04		0	1	11	2	8	5	0	2	E	34	8
10	10	3	2020-07-23	2020-08-07		0	1	12	2	9	5	0	1		34	8
10	10	4	2020-07-23	2020-08-11		0	1	11	2	8	10	0	1		34	8
10	10	5	2020-07-23	2020-08-14		0	1	11	1	9	6	0	2		34	8
10	10	6	2020-07-23	2020-08-18		0	1	11	1	9	14	0	0		34	8
10	10	7	2020-07-23	2020-08-21		0	1	12	1	10	18	0	1		34	8
10	10	8	2020-07-23	2020-08-25		0	1	11	2	8	20	0	1		34	8
10	10	9	2020-07-23	2020-08-28		0	1	12	2	9	9	0	1		34	8
10	10	10	2020-07-23	2020-09-01		0	1	11	1	9	10	0	1		34	8
10	10	11	2020-07-23	2020-09-04		0	1	10	2	7	4	0	3		34	8
10	10	12	2020-07-23	2020-09-08		0	1	10	1	8	8	0	0		34	8
10	10	13	2020-07-23	2020-09-11	50	1	0	9	2	7	12	0	4		34	8
10	11	1	2020-07-23	2020-07-30		0	1	12	2	9	1	0	1	P	34	21
10	11	2	2020-07-23	2020-08-06		0	1	8	2	5	8	0	5	E	34	21
10	11	3	2020-07-23	2020-08-10		0	1	10	2	7	22	0	3		34	21
10	11	4	2020-07-23	2020-08-13		0	1	10	2	7	23	0	0		34	21
10	11	5	2020-07-23	2020-08-17		0	1	12	2	9	12	0	1		34	21
10	11	6	2020-07-23	2020-08-20		0	1	11	2	8	12	0	1		34	21
10	11	7	2020-07-23	2020-08-24		0	1	13	2	10	10	0	0		34	21
10	11	8	2020-07-23	2020-08-27		0	1	12	2	9	14	1	1		34	21
10	11	9	2020-07-23	2020-08-31		0	1	13	2	10	22	0	0		34	21
10	11	10	2020-07-23	2020-09-03		0	1	12	2	9	22	0	1		34	21
10	11	11	2020-07-23	2020-09-07		0	1	13	2	10	10	0	0		34	21
10	11	12	2020-07-23	2020-09-10		0	1	11	2	8	11	1	2		34	21
10	11	13	2020-07-23	2020-09-14		0	1	13	2	10	14	0	0		34	21
10	11	14	2020-07-23	2020-09-17		0	1	13	2	10	23	0	0		34	21
10	11	15	2020-07-23	2020-09-21		0	1	10	2	7	15	0	3		34	21
10	11	16	2020-07-23	2020-09-24		0	1	9	2	6	22	0	1		34	21
10	11	17	2020-07-23	2020-09-28		0	1	10	1	9	13	0	2		34	21
10	11	18	2020-07-23	2020-10-01		0	1	11	1	9	12	0	0		34	21
10	11	19	2020-07-23	2020-10-05		0	1	12	1	10	12	0	0		34	21
10	11	20	2020-07-23	2020-10-08		0	1	13	2	10	12	0	0		34	21
10	11	21	2020-07-23	2020-10-12		0	1	12	2	9	25	0	1		34	21
10	11	22	2020-07-23	2020-10-15		0	1	13	2	10	15	1	0		34	21
10	11	23	2020-07-23	2020-10-19		0	1	12	2	9	25	0	1		34	21
10	11	24	2020-07-23	2020-10-22		0	1	13	2	10	11	0	0		34	21
10	11	25	2020-07-23	2020-10-26		1	0	8	1	7	19	0	4		34	21
10	12	1	2020-07-30	2020-07-30		0	1	13	2	10	2	0	0	P replaced	34	21
10	12	2	2020-07-30	2020-08-06		0	1	11	2	8	8	0	2	E	34	21
10	12	3	2020-07-30	2020-08-10		0	1	10	2	7	11	0	3		34	21
10	12	4	2020-07-30	2020-08-13		0	1	10	2	7	22	0	0		34	21
10	12	5	2020-07-30	2020-08-17		0	1	13	2	10	5	0	0		34	21
10	12	6	2020-07-30	2020-08-20		0	1	13	2	10	6	0	0		34	21
10	12	7	2020-07-30	2020-08-24		0	1	11	2	8	6	0	2		34	21
10	12	8	2020-07-30	2020-08-27		0	1	10	2	7	15	2	1		34	21
10	12	9	2020-07-30	2020-08-31		0	1	10	2	7	10	0	3		34	21
10	12	10	2020-07-30	2020-09-03		0	1	10	2	7	10	0	0		34	21
10	12	11	2020-07-30	2020-09-07		0	1	11	2	8	5	0	2		34	21
10	12	12	2020-07-30	2020-09-10		0	1	11	2	8	4	0	0		34	21
10	12	13	2020-07-30	2020-09-14		0	1	11	1	8	2	0	2		34	21
10	12	14	2020-07-30	2020-09-17		0	1	9	0	8	4	0	0		34	21
10	12	15	2020-07-30	2020-09-21		0	1	9	2	6	4	0	2		34	21
10	12	16	2020-07-30	2020-09-24		0	1	9	2	6	3	0	0		34	21
10	12	17	2020-07-30	2020-09-28		0	1	8	2	6	5	0	4		34	21
10	12	18	2020-07-30	2020-10-01		0	1	11	2	8	10	0	2		34	21
10	12	19	2020-07-30	2020-10-05		0	1	12	2	9	12	0	1		34	21
10	12	20	2020-07-30	2020-10-08		0	1	13	2	10	15	0	0		34	21
10	12	21	2020-07-30	2020-10-12		0	1	12	2	9	23	0	1		34	21
10	12	22	2020-07-30	2020-10-15		0	1	12	2	9	13	0	0		34	21
10	12	23	2020-07-30	2020-10-19		1	0	10	2	8	23	0	2		34	21
10	13	1	2020-07-23	2020-07-30		0	1	13	2	10	4	0	0	P	34	1
10	13	2	2020-07-23	2020-08-06		0	1	13	2	10	8	0	0	E	34	1
10	13	3	2020-07-23	2020-08-10		0	1	13	2	10	7	0	0		34	1
10	13	4	2020-07-23	2020-08-13		0	1	13	2	10	17	0	0		34	1
10	13	5	2020-07-23	2020-08-17		0	1	13	2	10	13	0	0		34	1
10	13	6	2020-07-23	2020-08-20		0	1	11	2	8	14	0	2		34	1
10	13	7	2020-07-23	2020-08-24		0	1	13	2	10	14	0	0		34	1
10	13	8	2020-07-23	2020-08-27		0	1	11	2	8	19	0	2		34	1
10	13	9	2020-07-23	2020-08-31		0	1	8	1	6	10	0	5		34	1
10	13	10	2020-07-23	2020-09-03		0	1	8	1	6	9	0	0		34	1
10	13	11	2020-07-23	2020-09-07		0	1	11	2	8	9	2	2		34	1
10	13	12	2020-07-23	2020-09-10		0	1	10	1	8	12	3	1		34	1
10	13	13	2020-07-23	2020-09-14		0	1	11	1	9	6	0	1		34	1
10	13	14	2020-07-23	2020-09-17		0	1	11	1	9	5	0	0		34	1
10	13	15	2020-07-23	2020-09-21		0	1	8	1	6	5	0	4		34	1
10	13	16	2020-07-23	2020-09-24		0	1	8	1	6	8	0	0		34	1
10	13	17	2020-07-23	2020-09-28		0	1	11	1	9	14	0	1		34	1
10	13	18	2020-07-23	2020-10-01		0	1	12	1	10	5	1	1		34	1
10	13	19	2020-07-23	2020-10-05		0	1	11	1	9	8	0	1		34	1
10	13	20	2020-07-23	2020-10-08		0	1	13	2	10	8	0	0		34	1
10	13	21	2020-07-23	2020-10-12		0	1	12	2	9	11	0	1		34	1
10	13	22	2020-07-23	2020-10-15		0	1	12	1	10	7	1	1		34	1
10	13	23	2020-07-23	2020-10-19		0	1	12	1	10	11	1	0		34	1
10	13	24	2020-07-23	2020-10-22		0	1	12	2	9	9	0	1		34	1
10	13	25	2020-07-23	2020-10-26		0	1	9	1	7	8	0	2		34	1
10	13	26	2020-07-23	2020-10-29		1	0	10	1	9	8	0	2		34	1
10	14	1	2020-07-23	2020-07-30		0	1	13	2	10	2	1	0	P	34	11
10	14	2	2020-08-06	2020-08-06		0	1	10	2	7	2	0	3	P replaced	34	11
10	14	3	2020-08-06	2020-08-10		0	1	10	2	7	8	0	3	P	34	11
10	14	4	2020-08-06	2020-08-13		0	1	8	2	5	6	0	2	E	34	11
10	14	5	2020-08-06	2020-08-17	11	1	0	11	2	9	12	0	2		34	11
10	15	1	2020-07-23	2020-07-30		0	1	10	2	7	4	1	3	E	34	21
10	15	2	2020-07-23	2020-08-06		0	1	8	2	5	8	0	5		34	21
10	15	3	2020-07-23	2020-08-10		0	1	11	2	8	17	0	2		34	21
10	15	4	2020-07-23	2020-08-13		0	1	11	2	8	17	0	0		34	21
10	15	5	2020-07-23	2020-08-17		0	1	10	2	7	9	0	3		34	21
10	15	6	2020-07-23	2020-08-20		0	1	10	2	7	12	0	0		34	21
10	15	7	2020-07-23	2020-08-24		0	1	10	2	7	19	0	3		34	21
10	15	8	2020-07-23	2020-08-27		0	1	10	2	7	19	1	0		34	21
10	15	9	2020-07-23	2020-08-31		0	1	11	2	8	12	0	2		34	21
10	15	10	2020-07-23	2020-09-03		0	1	11	2	8	10	1	0		34	21
10	15	11	2020-07-23	2020-09-07		0	1	12	2	9	8	0	1		34	21
10	15	12	2020-07-23	2020-09-10		0	1	12	2	9	6	0	0		34	21
10	15	13	2020-07-23	2020-09-14		0	1	11	2	8	13	0	2		34	21
10	15	14	2020-07-23	2020-09-17		0	1	11	2	8	15	0	0		34	21
10	15	15	2020-07-23	2020-09-21		0	1	9	2	6	14	0	4		34	21
10	15	16	2020-07-23	2020-09-24		0	1	9	2	6	17	0	0		34	21
10	15	17	2020-07-23	2020-09-28		0	1	10	2	7	13	0	3		34	21
10	15	18	2020-07-23	2020-10-01		0	1	13	2	10	15	0	0		34	21
10	15	19	2020-07-23	2020-10-05		0	1	13	2	10	17	0	0		34	21
10	15	20	2020-07-23	2020-10-08		0	1	13	2	10	12	0	0		34	21
10	15	21	2020-07-23	2020-10-12		0	1	13	2	10	20	0	0		34	21
10	15	22	2020-07-23	2020-10-15		1	1	11	2	9	15	0	2		34	21	crashed?
10	16	1	2020-07-24	2020-07-30		0	1	11	2	8	5	1	2	E	34	10
10	16	2	2020-07-24	2020-08-06		0	1	9	1	7	7	0	4		34	10
10	16	3	2020-07-24	2020-08-10		0	1	13	2	10	9	0	0		34	10
10	16	4	2020-07-24	2020-08-13		0	1	13	2	10	12	0	0		34	10
10	16	5	2020-07-24	2020-08-17		0	1	13	2	10	5	0	0		34	10
10	16	6	2020-07-24	2020-08-20		0	1	13	2	10	11	0	0		34	10
10	16	7	2020-07-24	2020-08-24		0	1	12	2	9	8	0	1		34	10
10	16	8	2020-07-24	2020-08-27		0	1	11	2	8	21	0	1		34	10
10	16	9	2020-07-24	2020-08-31		0	1	13	2	10	15	0	0		34	10
10	16	10	2020-07-24	2020-09-03		0	1	13	2	10	21	1	0		34	10
10	16	11	2020-07-24	2020-09-07		0	1	12	2	9	14	0	1		34	10
10	16	12	2020-07-24	2020-09-10		0	1	12	2	9	18	0	0		34	10
10	16	13	2020-07-24	2020-09-14		0	1	10	2	7	14	0	3		34	10
10	16	14	2020-07-24	2020-09-17		0	1	9	2	6	16	0	1		34	10
10	16	15	2020-07-24	2020-09-21		0	1	12	2	9	12	0	1		34	10
10	16	16	2020-07-24	2020-09-24		0	1	10	2	7	15	0	2		34	10
10	16	17	2020-07-24	2020-09-28		0	1	11	2	8	16	0	2		34	10
10	16	18	2020-07-24	2020-10-01		0	1	11	2	8	27	0	0		34	10
10	16	19	2020-07-24	2020-10-05		0	1	10	2	7	12	0	3		34	10
10	16	20	2020-07-24	2020-10-08		1	0	11	2	9	15	0	1		34	10
10	17	1	2020-07-24	2020-07-30		0	1	10	2	7	3	0	3	E	34	10
10	17	2	2020-07-24	2020-08-06		0	1	11	2	8	5	0	2		34	10
10	17	3	2020-07-24	2020-08-10		0	1	11	1	9	13	0	2		34	10
10	17	4	2020-07-24	2020-08-13		0	1	10	1	8	18	0	1		34	10
10	17	5	2020-07-24	2020-08-17		0	1	11	2	8	16	0	2		34	10
10	17	6	2020-07-24	2020-08-20		0	1	11	2	8	17	0	0		34	10
10	17	7	2020-07-24	2020-08-24		0	1	12	2	9	9	0	1		34	10
10	17	8	2020-07-24	2020-08-27		0	1	12	2	9	7	0	0		34	10
10	17	9	2020-07-24	2020-08-31		0	1	11	2	8	7	0	2		34	10
10	17	10	2020-07-24	2020-09-03		0	1	11	2	8	20	1	0		34	10
10	17	11	2020-07-24	2020-09-07		0	1	13	2	10	7	0	0		34	10
10	17	12	2020-07-24	2020-09-10		0	1	13	2	10	11	0	0		34	10
10	17	13	2020-07-24	2020-09-14		0	1	11	2	8	11	0	2		34	10
10	17	14	2020-07-24	2020-09-17		0	1	10	2	7	16	0	1		34	10
10	17	15	2020-07-24	2020-09-21		0	1	13	2	10	21	0	0		34	10
10	17	16	2020-07-24	2020-09-24		0	1	13	2	10	37	0	0		34	10
10	17	17	2020-07-24	2020-09-28		0	1	12	2	9	17	0	1		34	10
10	17	18	2020-07-24	2020-10-01		0	1	9	2	6	20	0	3		34	10
10	17	19	2020-07-24	2020-10-05		0	1	12	2	9	7	0	1		34	10
10	17	20	2020-07-24	2020-10-08		0	1	13	2	10	7	0	0		34	10
10	17	21	2020-07-24	2020-10-12		0	1	13	2	10	4	0	0		34	10
10	17	22	2020-07-24	2020-10-15		1	0	8	1	7	14	0	5		34	10
10	18	1	2020-07-24	2020-07-30		0	1	12	2	9	12	0	1	P	34	8
10	18	2	2020-07-24	2020-08-06		0	1	11	1	9	12	0	2	E	34	8
10	18	3	2020-07-24	2020-08-10		0	1	12	1	10	8	0	1		34	8
10	18	4	2020-07-24	2020-08-13		0	1	10	1	8	13	0	2		34	8
10	18	5	2020-07-24	2020-08-17		0	1	12	2	9	18	0	1		34	8
10	18	6	2020-07-24	2020-08-20		0	1	12	2	9	20	0	0		34	8
10	18	7	2020-07-24	2020-08-24		0	1	12	2	9	14	0	1		34	8
10	18	8	2020-07-24	2020-08-27		0	1	12	2	9	24	0	0		34	8
10	18	9	2020-07-24	2020-08-31		0	1	12	2	9	12	0	1		34	8
10	18	10	2020-07-24	2020-09-03		0	1	11	2	8	10	0	1		34	8
10	18	11	2020-07-24	2020-09-07		0	1	10	2	7	12	0	3		34	8
10	18	12	2020-07-24	2020-09-10		0	1	10	2	7	13	1	0		34	8
10	18	13	2020-07-24	2020-09-14		0	1	12	2	9	14	0	1		34	8
10	18	14	2020-07-24	2020-09-17		0	1	12	2	9	6	0	0		34	8
10	18	15	2020-07-24	2020-09-21		0	1	12	2	9	11	0	1		34	8
10	18	16	2020-07-24	2020-09-24		0	1	9	2	6	26	0	3		34	8
10	18	17	2020-07-24	2020-09-28		0	1	9	2	6	14	0	4		34	8
10	18	18	2020-07-24	2020-10-01		0	1	9	2	6	24	0	0		34	8
10	18	19	2020-07-24	2020-10-05		0	1	13	2	10	14	0	0		34	8
10	18	20	2020-07-24	2020-10-08		1	0	12	2	10	12	0	0		34	8
10	19	1	2020-07-23	2020-07-30		0	1	13	2	10	2	0	0	E	18	12
10	19	2	2020-07-23	2020-08-06		0	1	13	2	10	4	0	0		18	12
10	19	3	2020-07-23	2020-08-10		0	1	13	2	10	6	0	0		18	12
10	19	4	2020-07-23	2020-08-13		0	1	13	2	10	12	0	0		18	12
10	19	5	2020-07-23	2020-08-17		0	1	13	2	10	10	0	0		18	12
10	19	6	2020-07-23	2020-08-20		0	1	13	2	10	17	0	0		18	12
10	19	7	2020-07-23	2020-08-24		0	1	13	2	10	6	0	0		18	12
10	19	8	2020-07-23	2020-08-27		0	1	12	2	9	8	0	1		18	12
10	19	9	2020-07-23	2020-08-31		0	1	10	2	7	9	0	3		18	12
10	19	10	2020-07-23	2020-09-03		0	1	10	2	7	14	0	0		18	12
10	19	11	2020-07-23	2020-09-07		0	1	8	2	5	17	0	5		18	12
10	19	12	2020-07-23	2020-09-10		0	1	7	2	4	20	0	1		18	12
10	19	13	2020-07-23	2020-09-14		1	0	5	2	3	11	0	6		18	12
10	20	1	2020-07-23	2020-07-30		0	1	13	2	10	4	0	0	E	18	8
10	20	2	2020-07-23	2020-08-06		0	1	13	2	10	2	0	0		18	8
10	20	3	2020-07-23	2020-08-10		0	1	13	2	10	10	0	0		18	8
10	20	4	2020-07-23	2020-08-13		0	1	13	2	10	6	0	0		18	8
10	20	5	2020-07-23	2020-08-17		0	1	13	2	10	8	0	0		18	8
10	20	6	2020-07-23	2020-08-20		0	1	12	2	9	8	0	1		18	8
10	20	7	2020-07-23	2020-08-24		0	1	13	2	10	11	0	0		18	8
10	20	8	2020-07-23	2020-08-27		0	1	13	2	10	12	0	0		18	8
10	20	9	2020-07-23	2020-08-31		0	1	12	2	9	8	0	1		18	8
10	20	10	2020-07-23	2020-09-03		0	1	12	2	9	5	0	0		18	8
10	20	11	2020-07-23	2020-09-07		0	1	10	2	7	4	0	3		18	8
10	20	12	2020-07-23	2020-09-10		0	1	10	2	7	4	0	0		18	8
10	20	13	2020-07-23	2020-09-14		0	1	11	1	9	2	0	1		18	8
10	20	14	2020-07-23	2020-09-17		0	1	11	1	9	5	0	0		18	8
10	20	15	2020-07-23	2020-09-21		0	1	13	2	10	6	0	0		18	8
10	20	16	2020-07-23	2020-09-24		0	1	12	2	9	7	0	1		18	8
10	20	17	2020-07-23	2020-09-28		0	1	11	2	8	6	0	2		18	8
10	20	18	2020-07-23	2020-10-01		0	1	10	2	7	9	0	1		18	8
10	20	19	2020-07-23	2020-10-05		0	1	12	2	9	5	0	1		18	8
10	20	20	2020-07-23	2020-10-08		0	1	11	1	9	7	0	1		18	8
10	20	21	2020-07-23	2020-10-12		0	1	10	1	8	10	0	1		18	8
10	20	22	2020-07-23	2020-10-15		0	1	10	1	8	7	0	3		18	8
10	20	23	2020-07-23	2020-10-19		1	0	9	1	8	8	0	1		18	8
20	1	1	2020-07-21	2020-07-28		0	1	19	2	16	4	0	4	P	18	8
20	1	2	2020-07-21	2020-08-04		0	1	23	2	20	7	0	0	E	18	8
20	1	3	2020-07-21	2020-08-07		0	1	20	2	17	6	0	3		18	8
20	1	4	2020-07-21	2020-08-11	21	1	0	19	2	17	11	1	1		18	8
20	2	1	2020-07-21	2020-07-28		0	1	16	2	13	9	0	7	P	18	12
20	2	2	2020-08-04	2020-08-04		0	1	18	2	15	10	1	5	P replaced	18	12
20	2	3	2020-08-04	2020-08-07		0	1	20	2	17	13	0	3	P	18	12
20	2	4	2020-08-04	2020-08-11		0	1	19	2	16	12	0	1	E	18	12
20	2	5	2020-08-04	2020-08-14	10	1	0	21	2	19	11	0	2		18	12
20	3	1	2020-07-21	2020-07-28		0	1	20	2	17	3	0	3	E	18	12
20	3	2	2020-07-21	2020-08-04		0	1	14	2	11	7	0	9		18	12
20	3	3	2020-07-21	2020-08-07	17	1	0	16	2	14	7	0	7		18	12
20	4	1	2020-07-21	2020-07-28		0	1	20	2	17	3	0	3	P	18	6
20	4	2	2020-08-04	2020-08-04		0	1	18	2	15	5	0	5	P replaced	18	6
20	4	3	2020-08-04	2020-08-07		0	1	15	2	12	12	0	8	P	18	6
20	4	4	2020-08-04	2020-08-11		0	1	12	2	9	15	0	3	P	18	6
20	4	5	2020-08-04	2020-08-14		0	1	13	2	10	9	0	10	E	18	6
20	4	6	2020-08-04	2020-08-18		0	1	12	2	9	15	0	1		18	6
20	4	7	2020-08-04	2020-08-21		0	1	13	2	10	7	0	10		18	6
20	4	8	2020-08-04	2020-08-25		0	1	12	2	9	10	0	1		18	6
20	4	9	2020-08-04	2020-08-28		0	1	22	2	19	10	0	1		18	6
20	4	10	2020-08-04	2020-09-01		0	1	21	2	18	22	0	1		18	6
20	4	11	2020-08-04	2020-09-04		0	1	23	2	20	8	0	0		18	6
20	4	12	2020-08-04	2020-09-08		0	1	20	2	17	9	0	3		18	6
20	4	13	2020-08-04	2020-09-11		0	1	21	2	18	13	0	2		18	6
20	4	14	2020-08-04	2020-09-15		0	1	20	2	17	15	0	3		18	6
20	4	15	2020-08-04	2020-09-18		0	1	23	2	20	8	0	0		18	6
20	4	16	2020-08-04	2020-09-22		0	1	18	2	15	14	0	5		18	6
20	4	17	2020-08-04	2020-09-25		0	1	23	2	20	12	0	0		18	6
20	4	18	2020-08-04	2020-09-29		0	1	21	2	18	14	2	2		18	6
20	4	19	2020-08-04	2020-10-02		0	1	21	2	18	17	1	2		18	6
20	4	20	2020-08-04	2020-10-06		0	1	20	2	17	21	0	1		18	6
20	4	21	2020-08-04	2020-10-09		0	1	17	2	14	15	0	3		18	6
20	4	22	2020-08-04	2020-10-13		0	1	17	2	14	17	0	0		18	6
20	4	23	2020-08-04	2020-10-16		0	1	20	2	17	14	0	3		18	6
20	4	24	2020-08-04	2020-10-20		0	1	19	2	16	25	0	1		18	6
20	4	25	2020-08-04	2020-10-23		1	0	18	2	16	14	0	5		18	6
20	5	1	2020-07-24	2020-07-28		0	1	19	2	16	4	0	4	E	18	5
20	5	2	2020-07-24	2020-08-04		0	1	17	2	14	10	0	6		18	5
20	5	3	2020-07-24	2020-08-07		0	1	17	2	14	11	0	6		18	5
20	5	4	2020-07-24	2020-08-11		0	1	16	2	13	5	2	1		18	5
20	5	5	2020-07-24	2020-08-14		0	1	19	2	16	4	0	4		18	5
20	5	6	2020-07-24	2020-08-18		0	1	15	2	12	4	0	4		18	5
20	5	7	2020-07-24	2020-08-21		0	1	21	1	19	5	0	2		18	5
20	5	8	2020-07-24	2020-08-25		0	1	19	1	17	4	0	2		18	5
20	5	9	2020-07-24	2020-08-28		0	1	21	2	18	7	0	2		18	5
20	5	10	2020-07-24	2020-09-01		0	1	18	2	15	12	1	3		18	5
20	5	11	2020-07-24	2020-09-04		0	1	13	2	10	7	0	10		18	5
20	5	12	2020-07-24	2020-09-08		0	1	12	2	9	7	0	1		18	5
20	5	13	2020-07-24	2020-09-11		0	1	10	2	7	8	0	13		18	5
20	5	14	2020-07-24	2020-09-15		0	1	6	2	3	16	0	17		18	5
20	5	15	2020-07-24	2020-09-18		0	1	16	2	13	9	1	0		18	5
20	5	16	2020-07-24	2020-09-22		0	1	14	2	11	13	1	2		18	5	2 pupae from here,
20	5	17	2020-07-24	2020-09-25		0	1	23	2	20	10	0	0		18	5
20	5	18	2020-07-24	2020-09-29		1	0	20	2	18	17	0	3		18	5
20	6	1	2020-07-22	2020-07-28		0	1	16	2	13	3	0	7	P	18	1
20	6	2	2020-07-22	2020-08-04		0	1	15	2	12	3	2	8	E	18	1
20	6	3	2020-07-22	2020-08-07		0	1	17	2	14	10	0	6		18	1
20	6	4	2020-07-22	2020-08-11		0	1	17	2	14	7	2	0		18	1
20	6	5	2020-07-22	2020-08-14		0	1	18	2	15	5	0	5		18	1
20	6	6	2020-07-22	2020-08-18		0	1	14	2	11	5	1	4		18	1
20	6	7	2020-07-22	2020-08-21		0	1	19	2	16	6	0	4		18	1
20	6	8	2020-07-22	2020-08-25		0	1	16	2	13	10	0	3		18	1
20	6	9	2020-07-22	2020-08-28		0	1	21	2	18	7	0	2		18	1
20	6	10	2020-07-22	2020-09-01		0	1	19	2	16	7	0	2		18	1
20	6	11	2020-07-22	2020-09-04		0	1	20	2	17	5	0	3		18	1
20	6	12	2020-07-22	2020-09-08		0	1	18	2	15	6	0	2		18	1
20	6	13	2020-07-22	2020-09-11		0	1	22	2	19	8	0	1		18	1
20	6	14	2020-07-22	2020-09-15		0	1	22	2	19	10	0	0		18	1
20	6	15	2020-07-22	2020-09-18		0	1	22	2	19	14	0	1		18	1
20	6	16	2020-07-22	2020-09-22		0	1	19	1	17	18	0	2		18	1
20	6	17	2020-07-22	2020-09-25		0	1	19	2	16	21	0	4		18	1
20	6	18	2020-07-22	2020-09-29		0	1	18	2	15	22	2	1		18	1
20	6	19	2020-07-22	2020-10-02		0	1	18	2	15	14	0	4		18	1
20	6	20	2020-07-22	2020-10-06		0	1	17	2	14	13	1	1		18	1
20	6	21	2020-07-22	2020-10-09		0	1	19	2	16	14	1	4		18	1
20	6	22	2020-07-22	2020-10-13		0	1	19	2	16	20	0	0		18	1
20	6	23	2020-07-22	2020-10-16		0	1	23	2	20	15	1	0		18	1
20	6	24	2020-07-22	2020-10-20		0	1	16	1	14	19	1	6		18	1
20	6	25	2020-07-22	2020-10-23		0	1	18	1	17	13	1	3		18	1
20	6	26	2020-07-22	2020-10-27		0	1	15	1	13	12	0	4		18	1
20	6	27	2020-07-22	2020-10-30		0	1	22	1	20	11	0	0		18	1
20	6	28	2020-07-22	2020-11-03		0	1	21	1	19	12	0	1		18	1
20	6	29	2020-07-22	2020-11-06		0	1	19	1	19	8	1	3		18	1
20	6	30	2020-07-22	2020-11-10		1	0	14	1	13	10	1	0		18	1
20	7	1	2020-07-22	2020-07-28		0	1	19	1	17	7	0	4	P	18	4
20	7	2	2020-07-22	2020-08-04		0	1	19	2	16	5	0	4	E	18	4
20	7	3	2020-07-22	2020-08-07		0	1	23	2	20	5	0	0		18	4
20	7	4	2020-07-22	2020-08-11		0	1	21	2	18	22	0	2		18	4
20	7	5	2020-07-22	2020-08-14		0	1	22	2	19	6	0	1		18	4
20	7	6	2020-07-22	2020-08-18		0	1	18	2	15	18	0	4		18	4
20	7	7	2020-07-22	2020-08-21		0	1	20	2	17	13	0	3		18	4
20	7	8	2020-07-22	2020-08-25		0	1	16	2	13	19	0	4		18	4
20	7	9	2020-07-22	2020-08-28		0	1	23	2	20	11	0	0		18	4
20	7	10	2020-07-22	2020-09-01		0	1	23	2	20	14	0	0		18	4
20	7	11	2020-07-22	2020-09-04		0	1	22	2	19	11	0	1		18	4
20	7	12	2020-07-22	2020-09-08		0	1	19	2	16	12	0	3		18	4
20	7	13	2020-07-22	2020-09-11		0	1	20	2	17	9	0	3		18	4
20	7	14	2020-07-22	2020-09-15		0	1	20	2	17	15	0	0		18	4
20	7	15	2020-07-22	2020-09-18		0	1	22	2	19	13	0	1		18	4
20	7	16	2020-07-22	2020-09-22		0	1	19	2	16	23	0	3		18	4	4 pupae from 18.6
20	7	17	2020-07-22	2020-09-25		0	1	21	2	18	11	0	2		18	4
20	7	18	2020-07-22	2020-09-29		0	1	20	2	17	34	0	1		18	4
20	7	19	2020-07-22	2020-10-02		0	1	19	2	16	19	0	1		18	4
20	7	20	2020-07-22	2020-10-06		0	1	18	2	15	26	1	1		18	4
20	7	21	2020-07-22	2020-10-09		0	1	18	1	16	14	0	5		18	4
20	7	22	2020-07-22	2020-10-13		0	1	20	1	18	23	0	0		18	4
20	7	23	2020-07-22	2020-10-16		1	0	20	1	19	29	0	2		18	4
20	8	1	2020-07-22	2020-07-28		0	1	22	2	19	4	0	1	E	34	15
20	8	2	2020-07-22	2020-08-04		0	1	19	2	16	10	0	4		34	15
20	8	3	2020-07-22	2020-08-07		0	1	22	2	19	6	0	1		34	15
20	8	4	2020-07-22	2020-08-11		0	1	22	2	19	6	0	0		34	15
20	8	5	2020-07-22	2020-08-14		0	1	21	2	18	6	0	2		34	15
20	8	6	2020-07-22	2020-08-18		0	1	21	2	18	15	0	0		34	15
20	8	7	2020-07-22	2020-08-21		0	1	21	2	18	8	0	2		34	15
20	8	8	2020-07-22	2020-08-25		0	1	19	2	16	16	0	2		34	15
20	8	9	2020-07-22	2020-08-28		0	1	19	2	16	12	0	4		34	15
20	8	10	2020-07-22	2020-09-01		0	1	19	2	16	10	0	0		34	15
20	8	11	2020-07-22	2020-09-04		0	1	21	2	18	11	0	2		34	15
20	8	12	2020-07-22	2020-09-08		0	1	21	2	18	10	0	0		34	15
20	8	13	2020-07-22	2020-09-11		0	1	20	2	17	7	0	3		34	15
20	8	14	2020-07-22	2020-09-15		0	1	20	2	17	13	0	0		34	15
20	8	15	2020-07-22	2020-09-18		0	1	19	2	16	16	0	4		34	15
20	8	16	2020-07-22	2020-09-22		0	1	18	2	15	28	0	1		34	15
20	8	17	2020-07-22	2020-09-25		0	1	23	2	20	14	0	0		34	15
20	8	18	2020-07-22	2020-09-29		0	1	21	2	18	11	1	2		34	15
20	8	19	2020-07-22	2020-10-02		0	1	19	2	16	30	0	4		34	15
20	8	20	2020-07-22	2020-10-06		0	1	17	2	14	38	0	2		34	15
20	8	21	2020-07-22	2020-10-09		0	1	22	2	19	17	1	1		34	15
20	8	22	2020-07-22	2020-10-13		0	1	20	2	17	24	0	2		34	15
20	8	23	2020-07-22	2020-10-16		0	1	23	2	20	20	0	0		34	15
20	8	24	2020-07-22	2020-10-20		0	1	23	2	20	32	0	0		34	15
20	8	25	2020-07-22	2020-10-23		0	1	21	2	18	24	0	2		34	15
20	8	26	2020-07-22	2020-10-27		1	0	19	2	17	31	0	2		34	15
20	9	1	2020-07-22	2020-07-28		0	1	19	2	16	3	0	4	P	34	21
20	9	2	2020-07-22	2020-08-04		0	1	19	2	16	9	0	4	E	34	21
20	9	3	2020-07-22	2020-08-07		0	1	20	2	17	21	0	3		34	21
20	9	4	2020-07-22	2020-08-11		0	1	17	2	14	29	1	3		34	21
20	9	5	2020-07-22	2020-08-14		0	1	21	2	18	13	0	2		34	21
20	9	6	2020-07-22	2020-08-18		0	1	19	2	16	19	0	2		34	21
20	9	7	2020-07-22	2020-08-21		0	1	22	2	19	13	0	1		34	21
20	9	8	2020-07-22	2020-08-25		0	1	21	2	18	18	0	1		34	21
20	9	9	2020-07-22	2020-08-28		0	1	20	2	17	5	0	3		34	21
20	9	10	2020-07-22	2020-09-01		0	1	16	2	13	8	0	4		34	21
20	9	11	2020-07-22	2020-09-04		0	1	20	2	17	9	0	3		34	21
20	9	12	2020-07-22	2020-09-08		0	1	19	2	16	9	0	1		34	21
20	9	13	2020-07-22	2020-09-11		0	1	22	2	19	12	0	1		34	21
20	9	14	2020-07-22	2020-09-15		0	1	22	2	19	17	0	1		34	21
20	9	15	2020-07-22	2020-09-18		0	1	20	2	17	13	0	3		34	21
20	9	16	2020-07-22	2020-09-22		0	1	18	2	15	19	1	2		34	21	add worker pupae1 from 34.21, 4 from 34.22
20	9	17	2020-07-22	2020-09-25		0	1	20	2	18	16	1	2		34	21
20	9	18	2020-07-22	2020-09-29		0	1	19	2	16	21	2	2		34	21
20	9	19	2020-07-22	2020-10-02		0	1	21	1	19	14	1	2		34	21
20	9	20	2020-07-22	2020-10-06		0	1	20	2	17	14	0	3		34	21
20	9	21	2020-07-22	2020-10-09		0	1	18	2	15	13	1	2		34	21
20	9	22	2020-07-22	2020-10-13		0	1	18	2	15	13	1	0		34	21
20	9	23	2020-07-22	2020-10-16		0	1	22	2	19	8	0	1		34	21
20	9	24	2020-07-22	2020-10-20		1	0	18	2	16	16	0	3		34	21
20	10	1	2020-07-23	2020-07-28		0	1	19	2	16	4	0	4	P	34	8
20	10	2	2020-07-23	2020-08-04		0	1	19	2	16	6	0	4	E	34	8
20	10	3	2020-07-23	2020-08-07		0	1	20	2	17	9	0	3		34	8
20	10	4	2020-07-23	2020-08-11		0	1	14	2	11	19	0	6		34	8
20	10	5	2020-07-23	2020-08-14		0	1	23	2	20	11	0	0		34	8
20	10	6	2020-07-23	2020-08-18		0	1	21	2	18	21	0	2		34	8
20	10	7	2020-07-23	2020-08-21		0	1	22	2	19	9	0	1		34	8
20	10	8	2020-07-23	2020-08-25		0	1	18	2	15	20	0	4		34	8
20	10	9	2020-07-23	2020-08-28		0	1	22	2	19	15	0	1		34	8
20	10	10	2020-07-23	2020-09-01		0	1	19	2	16	23	0	3		34	8
20	10	11	2020-07-23	2020-09-04		0	1	21	2	18	8	0	2		34	8
20	10	12	2020-07-23	2020-09-08		0	1	19	2	16	9	0	2		34	8
20	10	13	2020-07-23	2020-09-11		0	1	13	2	11	8	0	9		34	8
20	10	14	2020-07-23	2020-09-15		0	1	14	2	12	12	0	0		34	8
20	10	15	2020-07-23	2020-09-18		0	1	23	2	20	13	0	0		34	8
20	10	16	2020-07-23	2020-09-22		0	1	17	2	14	18	0	6		34	8
20	10	17	2020-07-23	2020-09-25		0	1	20	2	17	11	0	3		34	8
20	10	18	2020-07-23	2020-09-29		0	1	20	2	17	15	0	0		34	8
20	10	19	2020-07-23	2020-10-02		0	1	23	2	20	14	0	0		34	8
20	10	20	2020-07-23	2020-10-06		0	1	19	2	16	17	0	4		34	8
20	10	21	2020-07-23	2020-10-09		0	1	23	2	20	18	0	0		34	8
20	10	22	2020-07-23	2020-10-13		0	1	22	2	19	20	0	1		34	8
20	10	23	2020-07-23	2020-10-16		0	1	23	2	20	17	0	0		34	8
20	10	24	2020-07-23	2020-10-20		1	0	19	2	17	12	0	3		34	8
20	11	1	2020-07-23	2020-07-30		0	1	20	2	17	7	1	3	E	34	21
20	11	2	2020-07-23	2020-08-06		0	1	18	2	15	21	0	5		34	21
20	11	3	2020-07-23	2020-08-10		0	1	22	2	19	29	0	1		34	21
20	11	4	2020-07-23	2020-08-13		0	1	20	2	17	33	0	2		34	21
20	11	5	2020-07-23	2020-08-17		0	1	20	2	17	26	0	3		34	21
20	11	6	2020-07-23	2020-08-20		0	1	20	2	17	39	0	0		34	21
20	11	7	2020-07-23	2020-08-24		0	1	20	2	17	19	0	3		34	21
20	11	8	2020-07-23	2020-08-27		0	1	20	2	17	23	2	0		34	21
20	11	9	2020-07-23	2020-08-31		0	1	20	2	17	18	0	3		34	21
20	11	10	2020-07-23	2020-09-03		0	1	19	2	16	20	1	1		34	21
20	11	11	2020-07-23	2020-09-07		0	1	21	2	18	16	0	2		34	21
20	11	12	2020-07-23	2020-09-10		0	1	21	2	18	16	1	0		34	21
20	11	13	2020-07-23	2020-09-14		0	1	18	2	15	14	0	5		34	21
20	11	14	2020-07-23	2020-09-17		0	1	17	2	14	14	0	1		34	21	3 workers from 34.10
20	11	15	2020-07-23	2020-09-21		0	1	23	2	20	15	0	1		34	21
20	11	16	2020-07-23	2020-09-24		0	1	19	2	16	24	0	4		34	21
20	11	17	2020-07-23	2020-09-28		0	1	23	2	20	24	0	0		34	21
20	11	18	2020-07-23	2020-10-01		1	0	20	2	18	30	0	3		34	21
20	12	1	2020-07-23	2020-07-30		0	1	19	2	15	3	1	4	E	34	21
20	12	2	2020-07-23	2020-08-06		0	1	21	2	17	8	0	2		34	21
20	12	3	2020-07-23	2020-08-10		0	1	18	2	15	16	0	5		34	21
20	12	4	2020-07-23	2020-08-13		0	1	18	2	15	19	0	0		34	21
20	12	5	2020-07-23	2020-08-17		0	1	20	2	17	12	0	3		34	21
20	12	6	2020-07-23	2020-08-20		0	1	17	2	14	10	0	3		34	21
20	12	7	2020-07-23	2020-08-24		0	1	20	2	17	7	0	3		34	21
20	12	8	2020-07-23	2020-08-27		0	1	19	2	16	12	0	1		34	21
20	12	9	2020-07-23	2020-08-31		0	1	23	2	20	5	0	0		34	21
20	12	10	2020-07-23	2020-09-03		0	1	22	2	19	7	0	1		34	21
20	12	11	2020-07-23	2020-09-07		0	1	22	2	19	5	0	1		34	21
20	12	12	2020-07-23	2020-09-10		0	1	17	2	14	8	0	5		34	21
20	12	13	2020-07-23	2020-09-14		0	1	22	2	20	14	0	0		34	21
20	12	14	2020-07-23	2020-09-17		0	1	22	2	19	17	0	1		34	21
20	12	15	2020-07-23	2020-09-21		0	1	21	2	18	17	0	2		34	21
20	12	16	2020-07-23	2020-09-24		0	1	20	2	17	15	0	1		34	21
20	12	17	2020-07-23	2020-09-28		0	1	22	2	19	15	0	1		34	21
20	12	18	2020-07-23	2020-10-01		0	1	22	2	19	14	0	0		34	21
20	12	19	2020-07-23	2020-10-05		0	1	18	1	16	12	0	3		34	21
20	12	20	2020-07-23	2020-10-08		0	1	21	2	18	19	0	0		34	21
20	12	21	2020-07-23	2020-10-12		0	1	20	2	17	13	0	1		34	21
20	12	22	2020-07-23	2020-10-15		0	1	23	2	20	18	1	0		34	21
20	12	23	2020-07-23	2020-10-19		0	1	22	2	19	24	1	1		34	21
20	12	24	2020-07-23	2020-10-22		0	1	23	2	20	15	0	0		34	21
20	12	25	2020-07-23	2020-10-26		1	0	20	2	18	30	0			34	21
20	13	1	2020-07-23	2020-07-30		0	1	21	1	19	8	0	2	E	34	1
20	13	2	2020-07-23	2020-08-06		0	1	13	1	11	5	0	10		34	1
20	13	3	2020-07-23	2020-08-10		0	1	19	2	16	9	0	4		34	1
20	13	4	2020-07-23	2020-08-13		0	1	19	2	16	7	0	0		34	1
20	13	5	2020-07-23	2020-08-17		0	1	22	2	19	4	0	1		34	1
20	13	6	2020-07-23	2020-08-20		0	1	22	2	19	5	0	0		34	1
20	13	7	2020-07-23	2020-08-24		0	1	20	2	17	12	0	3		34	1
20	13	8	2020-07-23	2020-08-27		0	1	20	2	17	17	0	0		34	1
20	13	9	2020-07-23	2020-08-31		0	1	21	2	18	17	0	2		34	1
20	13	10	2020-07-23	2020-09-03		0	1	19	2	16	22	0	2		34	1
20	13	11	2020-07-23	2020-09-07		0	1	23	2	20	10	0	0		34	1
20	13	12	2020-07-23	2020-09-10		0	1	21	2	18	12	1	2		34	1
20	13	13	2020-07-23	2020-09-14		0	1	19	2	16	11	0	4		34	1
20	13	14	2020-07-23	2020-09-17		0	1	17	2	14	13	0	2		34	1
20	13	15	2020-07-23	2020-09-21		0	1	18	2	15	19	0	5		34	1
20	13	16	2020-07-23	2020-09-24		0	1	15	2	13	22	0	3		34	1
20	13	17	2020-07-23	2020-09-28		0	1	20	2	17	21	0	3		34	1
20	13	18	2020-07-23	2020-10-01		0	1	23	2	20	23	2	0		34	1
20	13	19	2020-07-23	2020-10-05		0	1	23	2	20	19	0	0		34	1
20	13	20	2020-07-23	2020-10-08		0	1	22	2	19	23	0	1		34	1
20	13	21	2020-07-23	2020-10-12		0	1	21	2	18	28	2	1		34	1
20	13	22	2020-07-23	2020-10-15		0	1	22	2	19	22	1	1		34	1
20	13	23	2020-07-23	2020-10-19		0	1	21	2	18	29	0	1		34	1
20	13	24	2020-07-23	2020-10-22		0	1	21	2	18	14	0	0		34	1
20	13	25	2020-07-23	2020-10-26		0	1	18	2	16	20	0	2		34	1
20	13	26	2020-07-23	2020-10-29		1	0	20	2	18	7	1	3		34	1
20	14	1	2020-07-23	2020-07-30		0	1	15	2	12	9	0	8	P	34	11
20	14	2	2020-07-23	2020-08-06		0	1	15	2	12	4	0	8	E	34	11
20	14	3	2020-07-23	2020-08-10		0	1	20	2	17	4	0	3		34	11
20	14	4	2020-07-23	2020-08-13		0	1	20	2	17	5	1	0		34	11
20	14	5	2020-07-23	2020-08-17		0	1	18	1	16	5	0	5		34	11
20	14	6	2020-07-23	2020-08-20		0	1	17	1	15	10	0	1		34	11
20	14	7	2020-07-23	2020-08-24		0	1	19	1	17	7	0	4		34	11
20	14	8	2020-07-23	2020-08-27		0	1	19	1	17	12	0	0		34	11
20	14	9	2020-07-23	2020-08-31		0	1	21	2	18	10	0	2		34	11
20	14	10	2020-07-23	2020-09-03		0	1	21	2	18	14	0	0		34	11
20	14	11	2020-07-23	2020-09-07		0	1	20	2	17	12	0	3		34	11
20	14	12	2020-07-23	2020-09-10		0	1	18	2	15	24	0	2		34	11
20	14	13	2020-07-23	2020-09-14		0	1	19	2	16	11	0	4		34	11
20	14	14	2020-07-23	2020-09-17		0	1	18	2	15	10	0	1		34	11
20	14	15	2020-07-23	2020-09-21		0	1	19	2	16	12	1	4		34	11
20	14	16	2020-07-23	2020-09-24		0	1	15	2	12	12	0	4		34	11
20	14	17	2020-07-23	2020-09-28		0	1	21	2	18	20	0	2		34	11
20	14	18	2020-07-23	2020-10-01		0	1	20	2	17	24	0	1		34	11
20	14	19	2020-07-23	2020-10-05		0	1	23	2	20	18	0	0		34	11
20	14	20	2020-07-23	2020-10-08		0	1	21	2	18	25	0	2		34	11
20	14	21	2020-07-23	2020-10-12		0	1	16	2	13	29	5	5		34	11
20	14	22	2020-07-23	2020-10-15		0	1	23	2	20	15	0	0		34	11
20	14	23	2020-07-23	2020-10-19		0	1	20	2	17	22	0	3		34	11
20	14	24	2020-07-23	2020-10-22		0	1	21	2	18	17	0	2		34	11
20	14	25	2020-07-23	2020-10-26		0	1	20	2	17	20	0	1		34	11
20	14	26	2020-07-23	2020-10-29		1	0	15	2	13	25	0	8		34	11
20	15	1	2020-07-23	2020-07-30		0	1	21	2	18	8	0	2	E	34	21
20	15	2	2020-07-23	2020-08-06		0	1	16	2	13	7	0	7		34	21
20	15	3	2020-07-23	2020-08-10		0	1	18	2	15	18	0	5		34	21
20	15	4	2020-07-23	2020-08-13		0	1	18	2	15	23	0	0		34	21
20	15	5	2020-07-23	2020-08-17		0	1	20	2	17	5	0	3		34	21
20	15	6	2020-07-23	2020-08-20		0	1	19	2	16	6	0	1		34	21
20	15	7	2020-07-23	2020-08-24		0	1	20	2	17	6	0	3		34	21
20	15	8	2020-07-23	2020-08-27		0	1	18	2	15	8	1	2		34	21
20	15	9	2020-07-23	2020-08-31		0	1	23	2	20	12	0	0		34	21
20	15	10	2020-07-23	2020-09-03		0	1	20	1	18	19	0	3		34	21
20	15	11	2020-07-23	2020-09-07		0	1	21	1	19	6	0	2		34	21
20	15	12	2020-07-23	2020-09-10		0	1	21	1	19	5	2	0		34	21
20	15	13	2020-07-23	2020-09-14		0	1	19	1	17	5	0	3		34	21
20	15	14	2020-07-23	2020-09-17		0	1	18	1	16	9	0	1		34	21
20	15	15	2020-07-23	2020-09-21		0	1	20	2	17	11	0	3		34	21
20	15	16	2020-07-23	2020-09-24		0	1	20	2	17	14	0	0		34	21
20	15	17	2020-07-23	2020-09-28		0	1	19	2	16	15	0	4		34	21
20	15	18	2020-07-23	2020-10-01		0	1	23	2	20	14	0	0		34	21
20	15	19	2020-07-23	2020-10-05		0	1	19	2	16	15	0	0		34	21	start to standarise on mondays because then i can put pupae
20	15	20	2020-07-23	2020-10-08		0	1	21	2	18	15	0	2		34	21
20	15	21	2020-07-23	2020-10-12		0	1	21	2	18	15	0	0		34	21
20	15	22	2020-07-23	2020-10-15		0	1	22	2	19	15	0	1		34	21
20	15	23	2020-07-23	2020-10-19		0	1	18	2	15	19	1	4		34	21
20	15	24	2020-07-23	2020-10-22		0	1	23	2	20	13	1	0		34	21
20	15	25	2020-07-23	2020-10-26		0	1	20	1	18	20	0	2		34	21
20	15	26	2020-07-23	2020-10-29		0	1	20	1	18	16	0	0		34	21
20	15	27	2020-07-23	2020-11-02		0	1	19	1	17	15	0	0		34	21
20	15	28	2020-07-23	2020-11-05		0	1	20	1	18	11	0	1		34	21
20	15	29	2020-07-23	2020-11-09		0	1	20	1	18	17	0	0		34	21
20	15	30	2020-07-23	2020-11-12		0	1	22	1	20	10	0	0		34	21
20	15	31	2020-07-23	2020-11-16		0	1	20	1	18	10	0	2		34	21
20	15	32	2020-07-23	2020-11-19		0	1	20	1	18	13	0	2		34	21
20	15	33	2020-07-23	2020-11-23		1	0	16	1	15	12	0	5		34	21
20	16	1	2020-07-24	2020-07-30		0	1	15	2	12	2	2	8	E	34	7
20	16	2	2020-07-24	2020-08-06		0	1	14	2	11	11	1	9		34	7
20	16	3	2020-07-24	2020-08-10		0	1	18	2	15	8	0	5		34	7
20	16	4	2020-07-24	2020-08-13		0	1	16	2	13	13	0	2		34	7
20	16	5	2020-07-24	2020-08-17		0	1	19	2	16	10	0	4		34	7
20	16	6	2020-07-24	2020-08-20		0	1	19	2	16	12	0	0		34	7
20	16	7	2020-07-24	2020-08-24		0	1	20	2	17	21	0	3		34	7
20	16	8	2020-07-24	2020-08-27		0	1	18	2	15	22	0	2		34	7
20	16	9	2020-07-24	2020-08-31		0	1	19	2	16	10	0	4		34	7
20	16	10	2020-07-24	2020-09-03	41	1	0	13	2	11	10	0	6		34	7
20	17	1	2020-07-24	2020-07-30		0	1	19	2	16	5	0	4	E	34	9
20	17	2	2020-07-24	2020-08-06		0	1	19	2	16	5	0	4		34	9
20	17	3	2020-07-24	2020-08-10		0	1	16	2	13	6	0	7		34	9
20	17	4	2020-07-24	2020-08-13		0	1	16	2	13	18	0	0		34	9
20	17	5	2020-07-24	2020-08-17		0	1	22	2	19	17	0	1		34	9
20	17	6	2020-07-24	2020-08-20		0	1	22	2	19	22	0	0		34	9
20	17	7	2020-07-24	2020-08-24		0	1	22	2	19	10	0	1		34	9
20	17	8	2020-07-24	2020-08-27		0	1	21	2	18	13	0	1		34	9
20	17	9	2020-07-24	2020-08-31		0	1	22	2	19	20	0	1		34	9
20	17	10	2020-07-24	2020-09-03		0	1	20	2	17	21	0	2		34	9
20	17	11	2020-07-24	2020-09-07		0	1	22	2	19	21	0	1		34	9
20	17	12	2020-07-24	2020-09-10		0	1	20	2	17	16	0	2		34	9
20	17	13	2020-07-24	2020-09-14		0	1	22	2	19	18	0	1		34	9
20	17	14	2020-07-24	2020-09-17		0	1	21	2	18	20	0	1		34	9
20	17	15	2020-07-24	2020-09-21		0	1	20	2	17	21	0	3		34	9
20	17	16	2020-07-24	2020-09-24		0	1	19	2	16	28	1	1		34	9
20	17	17	2020-07-24	2020-09-28		0	1	17	2	15	26	0	5		34	9
20	17	18	2020-07-24	2020-10-01		0	1	21	2	18	27	0	2		34	9
20	17	19	2020-07-24	2020-10-05		0	1	21	2	18	23	0	2		34	9
20	17	20	2020-07-24	2020-10-08		0	1	21	2	18	18	0	0		34	9
20	17	21	2020-07-24	2020-10-12		0	1	21	2	18	20	0	0		34	9
20	17	22	2020-07-24	2020-10-15		0	1	19	2	16	26	0	2		34	9
20	17	23	2020-07-24	2020-10-19		0	1	19	2	16	38	1	4		34	9
20	17	24	2020-07-24	2020-10-22		0	1	23	2	20	19	0	0		34	9
20	17	25	2020-07-24	2020-10-26		1	0	20	2	18	25	1	3		34	9
20	18	1	2020-07-23	2020-07-30		0	1	18	2	15	6	0	5	P	18	9
20	18	2	2020-07-23	2020-08-06		0	1	20	2	17	3	0	3	E	18	9
20	18	3	2020-07-23	2020-08-10		0	1	21	2	18	4	0	2		18	9
20	18	4	2020-07-23	2020-08-13		0	1	21	2	18	5	0	0		18	9
20	18	5	2020-07-23	2020-08-17		0	1	20	2	17	13	0	3		18	9
20	18	6	2020-07-23	2020-08-20		0	1	17	2	14	13	0	3		18	9
20	18	7	2020-07-23	2020-08-24	32	1	0	19	2	17	6	0	4		18	9
20	19	1	2020-07-23	2020-07-30		0	1	22	2	19	5	0	1	P	18	4
20	19	2	2020-07-23	2020-08-06		0	1	16	2	13	3	0	7	E	18	4
20	19	3	2020-07-23	2020-08-10	18	1	0	20	1	19	2	0	3		18	4
20	20	1	2020-07-23	2020-07-30		0	1	20	2	17	2	0	3	E	18	5
20	20	2	2020-07-23	2020-08-06		0	1	17	2	14	5	1	6		18	5
20	20	3	2020-07-23	2020-08-10		0	1	17	2	14	12	0	6		18	5
20	20	4	2020-07-23	2020-08-13		0	1	17	2	14	12	0	0		18	5
20	20	5	2020-07-23	2020-08-17		0	1	17	2	14	15	0	6		18	5
20	20	6	2020-07-23	2020-08-20		0	1	16	2	13	14	0	1		18	5
20	20	7	2020-07-23	2020-08-24		0	1	18	1	16	12	0	5		18	5
20	20	8	2020-07-23	2020-08-27		0	1	17	2	14	19	1	1		18	5
20	20	9	2020-07-23	2020-08-31		0	1	16	1	14	5	0	1		18	5
20	20	10	2020-07-23	2020-09-03		0	1	16	1	14	8	1	0		18	5
20	20	11	2020-07-23	2020-09-07		0	1	19	1	17	6	0	4		18	5
20	20	12	2020-07-23	2020-09-10		0	1	19	1	16	12	0	0		18	5
20	20	13	2020-07-23	2020-09-14		0	1	14	1	12	18	0	8		18	5
20	20	14	2020-07-23	2020-09-17		0	1	14	1	12	23	0	0		18	5	from 18.10
20	20	15	2020-07-23	2020-09-21		0	1	8	1	7	17	0	13		18	5
20	20	16	2020-07-23	2020-09-24		0	1	8	1	7	24	0	0		18	5
20	20	17	2020-07-23	2020-09-28		0	1	16	1	14	15	0	6		18	5
20	20	18	2020-07-23	2020-10-01		0	1	17	1	15	18	0	2		18	5
20	20	19	2020-07-23	2020-10-05		0	1	22	1	20	15	0	1		18	5
20	20	20	2020-07-23	2020-10-08		0	1	21	1	19	14	0	1		18	5
20	20	21	2020-07-23	2020-10-12		0	1	19	1	18	18	0	1		18	5
20	20	22	2020-07-23	2020-10-15		0	1	18	1	16	23	0	2		18	5
20	20	23	2020-07-23	2020-10-19		0	1	18	1	16	30	0	0		18	5
20	20	24	2020-07-23	2020-10-22		0	1	22	1	20	13	0	0		18	5
20	20	25	2020-07-23	2020-10-26		0	1	22	1	20	23	1	0		18	5
20	20	26	2020-07-23	2020-10-29		1	0	21	1	20	11	0	1		18	5
Date grey = colony was standarized: 10/20 worker (cut tarsae), 5/10 larvae, 0 pupae
Surv Days = starting from Setup-Date
Dead = dead ants since last checkup, including queens and focal w
Total = Focal worker (eclosed or pupa) + queens + worker

## Sheet: Sheet1
Colony	Replicate	Date	Focal W	Queens	Workers	Larvae	Q Pupae
10	1	2020-10-13	1	2	7	11	0
10	1	2020-10-16
10	1	2020-10-20
10	1	2020-10-23
10	2	2020-10-13	1	1	9	12	0
10	2	2020-10-16
10	2	2020-10-20
10	2	2020-10-23
10	3	2020-10-13	1	2	10	10	0
10	3	2020-10-16
10	3	2020-10-20
10	3	2020-10-23
10	4	2020-10-13	1	2	9	16	0
10	4	2020-10-16
10	4	2020-10-20
10	4	2020-10-23
10	5	2020-10-13	1	2	10	20	1
10	5	2020-10-16
10	5	2020-10-20
10	5	2020-10-23
10	6	2020-10-13	1	2	9	7	0
10	6	2020-10-16
10	6	2020-10-20
10	6	2020-10-23
10	7	2020-10-13	1	2	9	11	0
10	7	2020-10-16
10	7	2020-10-20
10	7	2020-10-23
10	8	2020-10-13	1	2	9	25	0
10	8	2020-10-16
10	8	2020-10-20
10	8	2020-10-23
10	11	2020-10-12	1	2	9	25	0
10	11	2020-10-15
10	11	2020-10-19
10	11	2020-10-22
10	12	2020-10-12	1	2	9	23	0
10	12	2020-10-15
10	12	2020-10-19
10	12	2020-10-22
10	13	2020-10-12	1	2	9	11	0
10	13	2020-10-15
10	13	2020-10-19
10	13	2020-10-22
10	15	2020-10-12	1	2	10	20	0
10	15	2020-10-15
10	15	2020-10-19
10	15	2020-10-22
10	17	2020-10-12	1	2	10	4	0
10	17	2020-10-15
10	17	2020-10-19
10	17	2020-10-22
10	20	2020-10-12	1	1	8	10	0
10	20	2020-10-15
10	20	2020-10-19
10	20	2020-10-22
20	4	2020-10-13	1	2	14	17	0
20	4	2020-10-16
20	4	2020-10-20
20	4	2020-10-23
20	6	2020-10-13	1	2	16	20	0
20	6	2020-10-16
20	6	2020-10-20
20	6	2020-10-23
20	7	2020-10-13	1	1	18	23	0
20	7	2020-10-16
20	7	2020-10-20
20	7	2020-10-23
20	8	2020-10-13	1	2	17	24	0
20	8	2020-10-16
20	8	2020-10-20
20	8	2020-10-23
20	9	2020-10-13	1	2	15	13	1
20	9	2020-10-16
20	9	2020-10-20
20	9	2020-10-23
20	10	2020-10-13	1	2	19	20	0
20	10	2020-10-16
20	10	2020-10-20
20	10	2020-10-23
20	12	2020-10-12	1	2	17	13	0
20	12	2020-10-15
20	12	2020-10-19
20	12	2020-10-22
20	13	2020-10-12	1	2	18	28	2
20	13	2020-10-15
20	13	2020-10-19
20	13	2020-10-22
20	14	2020-10-12	1	2	13	29
20	14	2020-10-15
20	14	2020-10-19
20	14	2020-10-22
20	15	2020-10-12	1	2	18	15	0
20	15	2020-10-15
20	15	2020-10-19
20	15	2020-10-22
20	17	2020-10-12	1	2	18	20	0
20	17	2020-10-15
20	17	2020-10-19
20	17	2020-10-22
20	20	2020-10-12	1	1	18	18	0
20	20	2020-10-15
20	20	2020-10-19
20	20	2020-10-22
