# Supplementary material for: Late-life fitness gains and reproductive death in Cardiocondyla obscurior ants
Source: eLife. 2022 Apr 6;11:e74695. doi: 10.7554/eLife.74695 (PMC8986319; doi:10.7554/eLife.74695)
Supplement: Source data 9. — 4832 of 19,925 expressed genes were differentially expressed between age groups (after false discovery rate [FDR] adjustment p<0.001, DESeq2). [file elife-74695-data9.xlsx]

## Sheet: Sheet1
	baseMean	log2FoldChange	lfcSE	stat	pvalue	padj
COBS17826	695.344	4.5111	0.665263	6.78093	1.19406e-11	2.72022e-10
COBS13653	1586.1	4.35772	0.504414	8.63916	5.66257e-18	3.38794e-16
COBS15646	56.9372	4.27869	0.823294	5.19703	2.02496e-07	2.08042e-06
COBS00400	12.6124	3.95712	0.640981	6.17353	6.67803e-10	1.14101e-08
COBS15645	31.7107	2.86554	0.492963	5.81289	6.14052e-09	8.71007e-08
COBS00389	4.63988	2.82077	0.640094	4.40681	1.04906e-05	7.32903e-05
COBS00399	9.68831	2.77155	0.577319	4.80073	1.58086e-06	1.33928e-05
COBS19111	2.35334	2.58076	0.623179	4.14128	3.45369e-05	0.000210274
COBS00398	24.1786	2.57425	0.501807	5.12996	2.89803e-07	2.88818e-06
COBS13654	133.791	2.55867	0.436893	5.85651	4.72697e-09	6.9149e-08
COBS00397	13.3733	2.52913	0.493956	5.12015	3.0529e-07	3.03552e-06
COBS00396	6.90741	2.38188	0.575723	4.1372	3.5157e-05	0.000213373
COBS16806	93.3596	2.30895	0.292455	7.89506	2.9017e-15	1.13772e-13
COBS04124	2.65473	2.24802	0.523829	4.29152	1.77456e-05	0.000117389
COBS05785	4.93095	2.23436	0.566901	3.94136	8.10209e-05	0.000439992
COBS12347	387.254	2.19973	0.415171	5.29837	1.1684e-07	1.25953e-06
COBS15825	6.79896	2.17841	0.462696	4.70808	2.50056e-06	2.03661e-05
COBS07111	17026.8	2.17582	0.509954	4.26669	1.98392e-05	0.000129547
COBS08685	7.83607	2.17206	0.496462	4.37507	1.21391e-05	8.34913e-05
COBS13704	3.04605	2.17131	0.4751	4.57021	4.87237e-06	3.68779e-05
COBS00392	13.529	2.15277	0.427777	5.03246	4.84233e-07	4.60554e-06
COBS10210	102.692	2.13392	0.155114	13.7571	4.61594e-43	3.80068e-40
COBS19357	10.302	2.1288	0.333102	6.39083	1.64984e-10	3.07738e-09
COBS11696	7.60257	2.10569	0.354719	5.9362	2.917e-09	4.41662e-08
COBS00395	11.711	2.10254	0.476543	4.41206	1.0239e-05	7.16768e-05
COBS08440	479.319	2.06443	0.494912	4.17131	3.02857e-05	0.000188168
COBS00303	990.763	2.04189	0.457292	4.46519	7.99995e-06	5.75124e-05
COBS14251	76635.5	2.04051	0.372	5.48524	4.12916e-08	4.90366e-07
COBS05905	32.2954	2.01351	0.222638	9.04384	1.51263e-19	1.18886e-17
COBS16017	3.91217	2.00381	0.451876	4.43441	9.23239e-06	6.52379e-05
COBS05568	45.7515	1.96681	0.437365	4.49695	6.89359e-06	5.04858e-05
COBS10989	5.08965	1.96497	0.404259	4.86067	1.1699e-06	1.02114e-05
COBS02232	5.75668	1.95043	0.450475	4.32972	1.49297e-05	0.00010033
COBS09980	7.11205	1.94724	0.288171	6.75723	1.40656e-11	3.15036e-10
COBS15640	7.36949	1.93986	0.438286	4.42601	9.59922e-06	6.76365e-05
COBS05070	4.8791	1.91668	0.506666	3.78292	0.000154997	0.000780675
COBS07794	294.504	1.90368	0.320592	5.938	2.88527e-09	4.37874e-08
COBS04022	20.6678	1.8948	0.238619	7.94067	2.0109e-15	8.01161e-14
COBS01176	34.7653	1.89465	0.21087	8.98488	2.59016e-19	1.97297e-17
COBS19580	37.6692	1.88633	0.354871	5.31554	1.0634e-07	1.15498e-06
COBS10991	18.8042	1.88525	0.323753	5.82311	5.77634e-09	8.26126e-08
COBS14778	4.19157	1.88232	0.431021	4.36711	1.25899e-05	8.60099e-05
COBS02347	5.13649	1.84743	0.408443	4.5231	6.09418e-06	4.50896e-05
COBS09014	3.11375	1.825	0.459056	3.97555	7.02166e-05	0.000389264
COBS10543	6.61012	1.77346	0.420021	4.22232	2.41795e-05	0.000153935
COBS01952	573.328	1.76178	0.256847	6.85925	6.9221e-12	1.63959e-10
COBS19680	816.416	1.75651	0.245886	7.14361	9.0909e-13	2.51908e-11
COBS19283	664.569	1.74936	0.305067	5.73435	9.7889e-09	1.31209e-07
COBS16692	10.2685	1.73812	0.292354	5.94526	2.7602e-09	4.21017e-08
COBS10469	7.08196	1.73278	0.373199	4.64305	3.433e-06	2.69085e-05
COBS19134	47.338	1.7278	0.20878	8.2757	1.27698e-16	6.15051e-15
COBS04856	23.4016	1.71667	0.272784	6.29314	3.11102e-10	5.60341e-09
COBS03894	9.33949	1.71581	0.313433	5.47425	4.39368e-08	5.1822e-07
COBS13020	7.68363	1.71565	0.327256	5.24254	1.58384e-07	1.66381e-06
COBS14123	151.128	1.7123	0.205661	8.32585	8.37245e-17	4.16e-15
COBS00394	37.0477	1.70564	0.415505	4.10497	4.04364e-05	0.000241348
COBS06920	14.802	1.70461	0.329562	5.17234	2.31178e-07	2.34721e-06
COBS00393	38.7404	1.68325	0.325072	5.17808	2.24186e-07	2.28691e-06
COBS05354	236.104	1.68308	0.220663	7.62741	2.39522e-14	8.18494e-13
COBS14141	4.92389	1.67501	0.426448	3.92783	8.5717e-05	0.000462444
COBS11745	56.3847	1.67224	0.195454	8.55565	1.17202e-17	6.75515e-16
COBS00390	9.1627	1.66942	0.401684	4.15606	3.23786e-05	0.000198602
COBS10161	7.99425	1.62526	0.400799	4.05506	5.01215e-05	0.000290725
COBS14275	178.835	1.62245	0.325171	4.98954	6.0523e-07	5.5754e-06
COBS10727	415.427	1.61343	0.141083	11.4361	2.7613e-30	8.09249e-28
COBS00502	9.98681	1.61217	0.329582	4.89156	1.00041e-06	8.87079e-06
COBS09578	56.24	1.60849	0.146567	10.9745	5.0691e-28	1.18446e-25
COBS13633	7.81001	1.60793	0.369429	4.35247	1.34615e-05	9.13151e-05
COBS19439	1170.72	1.60279	0.167672	9.55909	1.18802e-21	1.22274e-19
COBS13866	42.2723	1.59312	0.187456	8.49863	1.91847e-17	1.06321e-15
COBS13447	13.0415	1.59256	0.280851	5.67048	1.42399e-08	1.86532e-07
COBS07697	5.57884	1.58835	0.376958	4.21359	2.51345e-05	0.000159428
COBS17570	303.002	1.58529	0.405415	3.9103	9.21821e-05	0.000493474
COBS05672	18.115	1.57396	0.229477	6.8589	6.9394e-12	1.64144e-10
COBS13705	14.613	1.57221	0.311393	5.04897	4.44189e-07	4.2622e-06
COBS05714	31889.5	1.56658	0.347128	4.51298	6.39237e-06	4.71144e-05
COBS15864	22.6573	1.55987	0.301905	5.16675	2.38196e-07	2.41563e-06
COBS16255	5.60712	1.558	0.396103	3.93333	8.37766e-05	0.000452681
COBS04587	12.1946	1.5573	0.298315	5.22033	1.78606e-07	1.85929e-06
COBS04009	23.7223	1.55112	0.351628	4.41127	1.02767e-05	7.18829e-05
COBS18148	8.16586	1.54975	0.380432	4.07365	4.62819e-05	0.000271367
COBS13439	90.9069	1.54051	0.197398	7.80409	5.9932e-15	2.24304e-13
COBS06332	4.33427	1.53583	0.406234	3.78066	0.000156414	0.000786667
COBS04008	39.5059	1.53518	0.326006	4.70903	2.48893e-06	2.02809e-05
COBS02645	58.6814	1.52896	0.213099	7.17486	7.23824e-13	2.0417e-11
COBS12301	54.8524	1.52111	0.158966	9.56875	1.08205e-21	1.12709e-19
COBS04105	244.506	1.49052	0.112288	13.274	3.27472e-40	2.57378e-37
COBS13012	4.82066	1.4885	0.392714	3.7903	0.000150464	0.000760503
COBS03111	276.493	1.48587	0.352967	4.20966	2.55761e-05	0.000161636
COBS18208	5.94758	1.47799	0.359791	4.10792	3.99246e-05	0.000238627
COBS11454	10.1766	1.4775	0.311197	4.74781	2.05628e-06	1.70447e-05
COBS01306	80.9614	1.46669	0.175201	8.37143	5.6923e-17	2.90341e-15
COBS06637	419.634	1.45936	0.334832	4.35847	1.30976e-05	8.90565e-05
COBS02635	31.9139	1.45563	0.166567	8.73901	2.35164e-18	1.50601e-16
COBS05659	35.1304	1.45343	0.163412	8.89432	5.87771e-19	4.19965e-17
COBS13141	50.7555	1.4521	0.142941	10.1588	3.02933e-24	4.32893e-22
COBS16628	9.05785	1.45084	0.30466	4.76215	1.91541e-06	1.59689e-05
COBS16690	110.788	1.44861	0.276281	5.24326	1.57761e-07	1.65928e-06
COBS13015	8.21915	1.43387	0.345376	4.15161	3.30139e-05	0.000202069
COBS15465	89.5253	1.43312	0.126953	11.2886	1.49323e-29	3.85364e-27
COBS00787	7.30401	1.43271	0.312606	4.58312	4.58081e-06	3.49083e-05
COBS07793	2236.39	1.43173	0.379726	3.77044	0.000162963	0.000815804
COBS18273	22.7669	1.42649	0.278966	5.11349	3.16255e-07	3.13015e-06
COBS16964	17.4013	1.42465	0.225541	6.31658	2.67413e-10	4.85188e-09
COBS04748	17.5631	1.42434	0.281957	5.0516	4.38127e-07	4.21572e-06
COBS15212	17.4847	1.41311	0.217381	6.50064	7.9981e-11	1.57512e-09
COBS07191	12.133	1.41177	0.27213	5.18786	2.12719e-07	2.1764e-06
COBS00278	5.94535	1.41133	0.358703	3.93453	8.33608e-05	0.000450717
COBS11133	260.641	1.40746	0.253116	5.56054	2.68944e-08	3.3344e-07
COBS18731	29.3093	1.39911	0.198254	7.05717	1.69925e-12	4.48575e-11
COBS03930	26.6105	1.39846	0.373434	3.74486	0.000180496	0.000892468
COBS02923	34.8839	1.39806	0.329232	4.24642	2.17212e-05	0.000140404
COBS13047	7.64923	1.39215	0.340193	4.09225	4.27214e-05	0.000253151
COBS13197	6.48667	1.38972	0.337145	4.12203	3.75546e-05	0.000226021
COBS06737	5.42004	1.37914	0.34189	4.03388	5.48635e-05	0.000314017
COBS13770	159.546	1.36392	0.132406	10.3011	6.96751e-25	1.0568e-22
COBS12987	487.136	1.36369	0.196298	6.94704	3.73039e-12	9.37531e-11
COBS16179	16.7503	1.3622	0.222105	6.13314	8.61635e-10	1.44086e-08
COBS05086	212.679	1.36191	0.270605	5.03284	4.83277e-07	4.60004e-06
COBS16170	24.0743	1.36073	0.196146	6.93731	3.99649e-12	1.00295e-10
COBS18751	8.81519	1.35905	0.288675	4.70789	2.50296e-06	2.03744e-05
COBS19421	28.8537	1.35714	0.21836	6.21514	5.1279e-10	8.93816e-09
COBS15884	9.46749	1.35424	0.357321	3.78997	0.000150668	0.000761087
COBS14222	12.8963	1.34959	0.282158	4.78312	1.72597e-06	1.45296e-05
COBS16268	33.7818	1.34655	0.201423	6.68518	2.30641e-11	4.96022e-10
COBS15697	192.617	1.338	0.198418	6.74335	1.54775e-11	3.43986e-10
COBS17480	24.3146	1.33709	0.188335	7.09953	1.25186e-12	3.4073e-11
COBS12420	4.7029	1.32814	0.347542	3.82151	0.000132638	0.000678736
COBS02182	7.27911	1.32274	0.350769	3.77097	0.000162612	0.000814519
COBS18147	33.1743	1.32193	0.17021	7.76647	8.0702e-15	2.95639e-13
COBS06835	114.607	1.3149	0.267069	4.92345	8.50315e-07	7.64973e-06
COBS17563	1438.36	1.31354	0.29908	4.39195	1.12341e-05	7.78239e-05
COBS01512	17.0197	1.31152	0.236301	5.55019	2.85355e-08	3.52182e-07
COBS15263	15.6347	1.3112	0.269616	4.86323	1.15484e-06	1.01004e-05
COBS15410	40.6968	1.30248	0.273821	4.75667	1.9681e-06	1.63686e-05
COBS11185	408.24	1.29859	0.247326	5.25052	1.51669e-07	1.59909e-06
COBS03590	246.59	1.29663	0.253532	5.11426	3.14977e-07	3.11928e-06
COBS11387	653.234	1.2918	0.157194	8.21791	2.07086e-16	9.65154e-15
COBS05867	297.606	1.29093	0.236341	5.46213	4.70464e-08	5.53012e-07
COBS12595	11.6331	1.29054	0.314638	4.10167	4.1018e-05	0.000244146
COBS11906	964.94	1.28799	0.222571	5.78684	7.17227e-09	9.99321e-08
COBS10811	27.2135	1.28526	0.172669	7.44348	9.80643e-14	3.09421e-12
COBS16754	467.201	1.27952	0.255289	5.01205	5.38539e-07	5.0439e-06
COBS17073	129.813	1.27451	0.18322	6.95617	3.4964e-12	8.80002e-11
COBS08181	60.8211	1.27372	0.147013	8.66396	4.55671e-18	2.7841e-16
COBS19048	50.2448	1.27167	0.203459	6.25027	4.09739e-10	7.2521e-09
COBS01920	233.027	1.26778	0.172977	7.32918	2.31569e-13	6.92744e-12
COBS15516	8.57932	1.26618	0.28979	4.36929	1.24652e-05	8.53946e-05
COBS00725	29.7078	1.26473	0.161872	7.81314	5.57812e-15	2.09222e-13
COBS14223	19.8002	1.26243	0.217332	5.80876	6.2936e-09	8.90529e-08
COBS15397	140.319	1.26177	0.260878	4.83664	1.32051e-06	1.13653e-05
COBS17490	26.2789	1.25854	0.204959	6.14045	8.22895e-10	1.38411e-08
COBS14021	144.239	1.25501	0.310434	4.04275	5.28268e-05	0.000304557
COBS17870	1484.41	1.25431	0.0601583	20.8501	1.51982e-96	2.62791e-92
COBS08571	81.0553	1.25402	0.266824	4.6998	2.60416e-06	2.10808e-05
COBS08953	5556.51	1.25089	0.111196	11.2494	2.33278e-29	5.93179e-27
COBS13765	7.9013	1.2507	0.318738	3.92393	8.71167e-05	0.000469117
COBS09802	13.8485	1.25028	0.248912	5.02298	5.08752e-07	4.79914e-06
COBS18209	84.9292	1.2466	0.20743	6.00972	1.85839e-09	2.93993e-08
COBS05748	169.074	1.24504	0.239618	5.19593	2.037e-07	2.08907e-06
COBS09031	7.93016	1.24462	0.313205	3.97382	7.0729e-05	0.000391728
COBS08900	161.061	1.23326	0.0986456	12.5019	7.29013e-36	3.70746e-33
COBS08766	50.5881	1.23267	0.16295	7.56475	3.88622e-14	1.27994e-12
COBS02914	47.3164	1.22621	0.136638	8.97414	2.85561e-19	2.1468e-17
COBS04891	5.91913	1.22074	0.316578	3.85603	0.000115242	0.000600374
COBS13925	10.4814	1.21896	0.300957	4.05029	5.11548e-05	0.000295924
COBS18772	6.71167	1.21671	0.278205	4.37345	1.223e-05	8.39337e-05
COBS04855	40.9039	1.21504	0.205053	5.92549	3.11373e-09	4.70214e-08
COBS14088	15.2089	1.21408	0.245998	4.93535	8.00081e-07	7.23546e-06
COBS19367	29.4968	1.20564	0.269467	4.47417	7.6709e-06	5.5381e-05
COBS08279	13.4064	1.20534	0.288413	4.17923	2.92502e-05	0.000182521
COBS10986	15.1661	1.20505	0.31603	3.81309	0.000137242	0.000699934
COBS06793	605.678	1.20393	0.303361	3.96864	7.22828e-05	0.000398673
COBS18210	14.6323	1.20277	0.303044	3.96895	7.21901e-05	0.00039829
COBS05027	12.2311	1.20106	0.2683	4.47657	7.585e-06	5.48525e-05
COBS17818	40.9994	1.20022	0.168918	7.10536	1.20006e-12	3.27291e-11
COBS11370	684.196	1.19147	0.121605	9.79783	1.15027e-22	1.37168e-20
COBS19891	330.312	1.1912	0.236744	5.03159	4.86435e-07	4.61632e-06
COBS13828	9.13483	1.18658	0.281346	4.21753	2.46998e-05	0.000156843
COBS18851	29.6047	1.18422	0.177914	6.65617	2.81062e-11	5.97767e-10
COBS18722	15.3379	1.18112	0.212009	5.57109	2.53157e-08	3.15598e-07
COBS07022	5.7144	1.18032	0.308964	3.82026	0.000133312	0.000681376
COBS09337	58.2986	1.17905	0.283318	4.1616	3.1603e-05	0.000194258
COBS19410	13.073	1.17864	0.269661	4.37083	1.23775e-05	8.48271e-05
COBS19270	6.97488	1.17768	0.315139	3.73701	0.000186225	0.000915165
COBS16175	23.4664	1.17574	0.22056	5.33072	9.78223e-08	1.07257e-06
COBS13149	453.163	1.17562	0.284474	4.13262	3.58653e-05	0.000217214
COBS01505	64.0878	1.17485	0.13511	8.69554	3.45189e-18	2.147e-16
COBS01507	73.9672	1.17399	0.122844	9.55671	1.21555e-21	1.24367e-19
COBS09207	253.113	1.17177	0.231543	5.06069	4.1774e-07	4.04412e-06
COBS13827	19.6715	1.17048	0.20475	5.71666	1.08637e-08	1.44606e-07
COBS12493	17.2009	1.16918	0.266682	4.38417	1.16428e-05	8.04622e-05
COBS19696	697.632	1.16885	0.0937187	12.4718	1.06329e-35	5.25298e-33
COBS14191	22.9503	1.16603	0.21594	5.39977	6.67269e-08	7.59562e-07
COBS12193	292.203	1.16518	0.15784	7.38202	1.55901e-13	4.77959e-12
COBS09842	7874.73	1.16432	0.291519	3.99399	6.49694e-05	0.000363673
COBS13706	23.9935	1.16351	0.253425	4.59114	4.40837e-06	3.37429e-05
COBS08627	428.385	1.16349	0.254663	4.56874	4.90672e-06	3.70975e-05
COBS12377	17.1538	1.16274	0.21157	5.49578	3.88983e-08	4.64817e-07
COBS07391	10.8377	1.16214	0.299562	3.87947	0.000104686	0.000551194
COBS05871	125.891	1.16127	0.177281	6.55041	5.73794e-11	1.15635e-09
COBS07155	1763.02	1.16086	0.230898	5.0276	4.96666e-07	4.69795e-06
COBS00484	15.8992	1.16006	0.295193	3.92983	8.50064e-05	0.000458896
COBS17151	7.39342	1.15946	0.310811	3.73042	0.000191158	0.000936351
COBS13165	115.442	1.15758	0.167936	6.89296	5.46442e-12	1.32704e-10
COBS17634	86.8791	1.15679	0.144662	7.99654	1.27963e-15	5.25562e-14
COBS19157	8.68907	1.15665	0.264115	4.37936	1.19028e-05	8.19962e-05
COBS11679	16933	1.15515	0.285281	4.04915	5.14046e-05	0.000297171
COBS01610	28.3375	1.15429	0.200107	5.76837	8.00421e-09	1.09755e-07
COBS02679	10.9922	1.15244	0.281633	4.09198	4.27714e-05	0.000253274
COBS09665	25.9838	1.14967	0.183294	6.27227	3.55811e-10	6.36887e-09
COBS06476	127.58	1.14953	0.101794	11.2927	1.4258e-29	3.73538e-27
COBS08337	19.528	1.14655	0.28178	4.06895	4.72257e-05	0.000276058
COBS10527	101.218	1.14565	0.207079	5.53242	3.15836e-08	3.86765e-07
COBS03677	13.719	1.14375	0.225779	5.06582	4.06653e-07	3.9436e-06
COBS06296	70.205	1.14277	0.127695	8.9492	3.58061e-19	2.62341e-17
COBS04165	14.7809	1.13833	0.268177	4.24468	2.18905e-05	0.000141111
COBS03075	313.5	1.13641	0.0898419	12.649	1.13326e-36	6.53173e-34
COBS19165	13.9664	1.13593	0.216302	5.25161	1.50779e-07	1.59263e-06
COBS01972	18.8168	1.13477	0.275881	4.11325	3.90124e-05	0.000233899
COBS03953	44.3418	1.13463	0.189746	5.9797	2.23543e-09	3.48538e-08
COBS00181	143.233	1.13373	0.182377	6.21643	5.08604e-10	8.87414e-09
COBS10075	82.5376	1.13343	0.132439	8.55808	1.14767e-17	6.63691e-16
COBS01399	7.986	1.13209	0.289559	3.9097	9.24105e-05	0.000494543
COBS18748	22.1022	1.13201	0.18866	6.00027	1.96991e-09	3.0937e-08
COBS18721	55.2194	1.13186	0.177555	6.3747	1.83317e-10	3.40466e-09
COBS09959	161.096	1.13133	0.157826	7.16818	7.59997e-13	2.1333e-11
COBS06987	45.4402	1.12935	0.160336	7.04361	1.87325e-12	4.90764e-11
COBS09747	97.4621	1.1293	0.144193	7.83188	4.80636e-15	1.82252e-13
COBS06660	43.6874	1.12832	0.225691	4.99939	5.75123e-07	5.33683e-06
COBS13215	15.0806	1.1236	0.278604	4.03295	5.50813e-05	0.000314886
COBS19336	10.1179	1.12338	0.265732	4.22748	2.36327e-05	0.000150787
COBS19436	382.879	1.12045	0.132784	8.43816	3.22376e-17	1.72221e-15
COBS16602	120.333	1.12013	0.118217	9.47522	2.66211e-21	2.58599e-19
COBS03929	1912.05	1.11869	0.246407	4.54	5.62556e-06	4.20724e-05
COBS09070	7.85257	1.11676	0.28588	3.9064	9.36807e-05	0.00050016
COBS00279	34.6843	1.11665	0.1557	7.17182	7.40081e-13	2.08416e-11
COBS18271	28.223	1.11102	0.2138	5.19655	2.03026e-07	2.08464e-06
COBS17405	12.349	1.11003	0.216023	5.13846	2.76997e-07	2.76693e-06
COBS04904	10.3369	1.1081	0.297236	3.728	0.000193007	0.000943268
COBS05429	8.29977	1.10482	0.266689	4.14274	3.43184e-05	0.000209312
COBS15552	8.30178	1.10457	0.264831	4.17082	3.035e-05	0.000188431
COBS14816	19.1013	1.10375	0.240948	4.58085	4.6309e-06	3.51814e-05
COBS03459	10.7192	1.09957	0.258845	4.24796	2.15722e-05	0.00013965
COBS12426	202.422	1.09938	0.185062	5.94058	2.84015e-09	4.31918e-08
COBS04552	15.2602	1.09892	0.266288	4.12681	3.67833e-05	0.000221997
COBS19237	7.16471	1.09771	0.292382	3.75436	0.000173782	0.000863466
COBS13304	127.852	1.09705	0.171471	6.3979	1.57533e-10	2.95755e-09
COBS19330	7.64711	1.09008	0.274742	3.96764	7.25892e-05	0.000399878
COBS19338	13.1386	1.08595	0.25329	4.28737	1.80804e-05	0.000119187
COBS15182	167.32	1.0853	0.14998	7.23632	4.61038e-13	1.32642e-11
COBS14735	89.6709	1.08521	0.191448	5.66846	1.44087e-08	1.88458e-07
COBS11392	19.8008	1.08462	0.218815	4.95682	7.16575e-07	6.54533e-06
COBS16258	66.0619	1.08359	0.158346	6.84315	7.7469e-12	1.80528e-10
COBS03143	15.57	1.08211	0.250568	4.31864	1.56995e-05	0.000105014
COBS13472	7.56109	1.07612	0.285108	3.77443	0.000160376	0.000803555
COBS09889	38.8149	1.0758	0.178006	6.04363	1.50681e-09	2.42365e-08
COBS09698	1148.29	1.07367	0.150139	7.15122	8.6011e-13	2.39487e-11
COBS04030	13.326	1.07264	0.257225	4.17005	3.04536e-05	0.000188939
COBS15650	66.7631	1.07238	0.138452	7.74548	9.52186e-15	3.45888e-13
COBS16808	24.2815	1.07233	0.248248	4.31959	1.56323e-05	0.000104645
COBS13013	9.78358	1.07211	0.263716	4.0654	4.79504e-05	0.000279821
COBS03823	39.737	1.06979	0.242811	4.40587	1.05358e-05	7.35168e-05
COBS13897	33.7424	1.06933	0.273586	3.90858	9.28387e-05	0.000496528
COBS02741	775.056	1.06904	0.0694831	15.3856	2.04385e-53	2.77096e-50
COBS17963	23.8215	1.06856	0.228815	4.66996	3.01252e-06	2.39492e-05
COBS07983	34.5312	1.06355	0.250559	4.24471	2.18878e-05	0.000141111
COBS08794	32.614	1.0635	0.183971	5.78078	7.43538e-09	1.03265e-07
COBS07597	573.603	1.06159	0.100879	10.5233	6.7446e-26	1.17799e-23
COBS00091	9.30745	1.06144	0.254685	4.16766	3.07739e-05	0.000190448
COBS07480	26.4293	1.06136	0.183305	5.79013	7.03301e-09	9.83087e-08
COBS11676	24.6676	1.05478	0.23076	4.57089	4.85659e-06	3.67829e-05
COBS04174	17.1208	1.05357	0.200361	5.25834	1.45359e-07	1.54007e-06
COBS00652	66.7075	1.05313	0.103119	10.2128	1.73831e-24	2.54721e-22
COBS10445	24.7785	1.052	0.232954	4.51588	6.3053e-06	4.65322e-05
COBS09674	35.6057	1.04494	0.192233	5.43579	5.45527e-08	6.32219e-07
COBS14979	15.2904	1.04414	0.226248	4.61502	3.93062e-06	3.03819e-05
COBS14264	19.8651	1.04382	0.188878	5.52642	3.26838e-08	3.97983e-07
COBS18777	16.745	1.04321	0.279949	3.72641	0.000194227	0.000947893
COBS10602	306.724	1.04317	0.170606	6.1145	9.68617e-10	1.60733e-08
COBS03037	110.518	1.04273	0.203759	5.11745	3.09692e-07	3.07575e-06
COBS09906	25.2425	1.04181	0.198521	5.24787	1.53871e-07	1.62132e-06
COBS06373	14.915	1.04152	0.245909	4.23538	2.28167e-05	0.000146228
COBS11781	72.4174	1.04021	0.214669	4.84566	1.26192e-06	1.09154e-05
COBS15744	9.63321	1.03637	0.262581	3.94687	7.91791e-05	0.000431616
COBS13983	31.419	1.03506	0.245779	4.21135	2.53851e-05	0.000160723
COBS01110	18.4279	1.02994	0.242221	4.25206	2.11813e-05	0.00013748
COBS15213	35.4207	1.02946	0.14916	6.90173	5.13722e-12	1.25818e-10
COBS03745	9.70093	1.02846	0.262536	3.91742	8.95007e-05	0.000480309
COBS01317	14.3294	1.02732	0.269573	3.8109	0.000138463	0.000705203
COBS19344	29.6613	1.02718	0.179549	5.7209	1.0596e-08	1.4137e-07
COBS17232	56.0041	1.02697	0.207955	4.93843	7.87545e-07	7.13329e-06
COBS10484	391.873	1.02656	0.222036	4.62338	3.77533e-06	2.9319e-05
COBS13870	65.9988	1.02455	0.12388	8.27053	1.3337e-16	6.38809e-15
COBS11435	27.0635	1.02416	0.184889	5.53933	3.03626e-08	3.73666e-07
COBS08523	25.9897	1.02288	0.187492	5.45557	4.88165e-08	5.71874e-07
COBS19246	221.267	1.02115	0.0995547	10.2572	1.09851e-24	1.62345e-22
COBS18747	10.9216	1.02086	0.242695	4.20636	2.59517e-05	0.000163806
COBS06871	24.3654	1.02073	0.259569	3.93239	8.41045e-05	0.00045417
COBS16963	13.7436	1.01509	0.247737	4.09743	4.17762e-05	0.000248317
COBS02445	49.1539	1.01482	0.210376	4.82383	1.4083e-06	1.20251e-05
COBS09305	64.2525	1.01232	0.190067	5.32611	1.00339e-07	1.096e-06
COBS09418	51.7447	1.01216	0.17319	5.84423	5.08926e-09	7.39483e-08
COBS01711	11.9892	1.01202	0.266902	3.79174	0.000149597	0.000756561
COBS15317	406.913	1.01189	0.130918	7.72923	1.08196e-14	3.89754e-13
COBS15354	53.3946	1.01125	0.184684	5.47555	4.36149e-08	5.15479e-07
COBS19413	90.202	1.01099	0.234526	4.31076	1.62697e-05	0.000108504
COBS01606	22.6295	1.01043	0.252964	3.99438	6.48636e-05	0.000363434
COBS00946	14.1761	1.00876	0.269046	3.74938	0.000177271	0.000878027
COBS13441	17.5942	1.00819	0.225256	4.47575	7.61423e-06	5.50178e-05
COBS15748	46.3572	1.00438	0.150827	6.65916	2.7539e-11	5.87147e-10
COBS02184	20.765	1.00166	0.210541	4.75757	1.95936e-06	1.63038e-05
COBS01417	29.7113	1.00039	0.250298	3.9968	6.42049e-05	0.000360327
COBS12371	189.788	0.999576	0.241199	4.14419	3.41013e-05	0.000208135
COBS13993	16.6125	0.994788	0.220752	4.50636	6.59485e-06	4.85034e-05
COBS13523	33.7127	0.993038	0.162837	6.09836	1.07164e-09	1.76474e-08
COBS18774	13.9634	0.993034	0.22657	4.38289	1.17113e-05	8.09032e-05
COBS14368	57.5075	0.992346	0.26655	3.72292	0.000196933	0.00095947
COBS03668	226.001	0.991579	0.248543	3.98957	6.61941e-05	0.000369691
COBS03710	504.342	0.991135	0.247005	4.01261	6.00498e-05	0.000339654
COBS18245	12.8193	0.986004	0.231743	4.25472	2.09308e-05	0.00013616
COBS01788	41.7878	0.985803	0.255822	3.85347	0.000116456	0.000605607
COBS10646	55.7229	0.983793	0.161885	6.07713	1.22354e-09	1.99588e-08
COBS06938	48.462	0.983403	0.173802	5.65818	1.5299e-08	1.98302e-07
COBS01057	17.6416	0.982575	0.233785	4.2029	2.63523e-05	0.000165935
COBS06647	14.6882	0.980534	0.204865	4.78624	1.69935e-06	1.43334e-05
COBS16446	28.1916	0.980044	0.169328	5.78785	7.1293e-09	9.94135e-08
COBS00009	32.0822	0.979577	0.151046	6.48528	8.85653e-11	1.72842e-09
COBS02041	6486.56	0.973825	0.101229	9.62	6.58288e-22	7.15878e-20
COBS02883	17.795	0.972701	0.216874	4.4851	7.28802e-06	5.29707e-05
COBS06911	59.8068	0.972395	0.148906	6.53027	6.5653e-11	1.31238e-09
COBS05919	13.5881	0.97228	0.232168	4.18782	2.81642e-05	0.000176317
COBS19827	402.945	0.970992	0.167151	5.80906	6.2826e-09	8.897e-08
COBS15555	12.8713	0.969925	0.252608	3.83965	0.00012321	0.000636327
COBS03124	205.926	0.968121	0.189581	5.10663	3.27962e-07	3.23491e-06
COBS16209	31.3685	0.966413	0.171563	5.63298	1.7712e-08	2.26523e-07
COBS17437	293.65	0.964225	0.213115	4.52444	6.05544e-06	4.48606e-05
COBS09262	17.143	0.963738	0.254159	3.79186	0.000149521	0.000756398
COBS15411	42.2905	0.961044	0.215633	4.45684	8.3175e-06	5.94781e-05
COBS02739	329.358	0.960447	0.180862	5.31038	1.09395e-07	1.18518e-06
COBS14116	22.088	0.956304	0.234453	4.07887	4.52559e-05	0.000266435
COBS00294	320.915	0.955866	0.0995631	9.60061	7.94755e-22	8.48279e-20
COBS00914	98.0431	0.955446	0.165527	5.77214	7.82697e-09	1.0801e-07
COBS08797	11.0411	0.95505	0.254409	3.75399	0.000174042	0.000864187
COBS05056	28.542	0.954905	0.250431	3.81304	0.000137267	0.000699934
COBS07602	26.8746	0.954636	0.16549	5.76855	7.99572e-09	1.09725e-07
COBS09679	14.312	0.94942	0.227199	4.1788	2.93055e-05	0.000182734
COBS10610	296.842	0.947804	0.156521	6.05546	1.40016e-09	2.269e-08
COBS11149	302.903	0.947309	0.120306	7.87417	3.43014e-15	1.32983e-13
COBS19238	17.6846	0.945763	0.223421	4.2331	2.30493e-05	0.000147445
COBS19513	78.3394	0.945435	0.126538	7.47157	7.92426e-14	2.54208e-12
COBS03928	547.709	0.944065	0.237621	3.97299	7.09756e-05	0.000392842
COBS08904	129.962	0.943013	0.136754	6.89569	5.36048e-12	1.30363e-10
COBS17495	119.777	0.94144	0.190031	4.95414	7.26495e-07	6.62893e-06
COBS11449	37.2367	0.940479	0.169476	5.54933	2.86768e-08	3.53422e-07
COBS14518	106.301	0.938347	0.107697	8.71283	2.96368e-18	1.87026e-16
COBS00532	93.1463	0.936922	0.182687	5.12857	2.91955e-07	2.90675e-06
COBS11579	150.609	0.936707	0.168608	5.55555	2.76745e-08	3.42289e-07
COBS08154	28.8552	0.9358	0.159104	5.88167	4.06147e-09	6.03324e-08
COBS02493	263.11	0.935796	0.241014	3.88275	0.000103284	0.000545473
COBS03101	137.515	0.934718	0.133481	7.00264	2.51188e-12	6.44406e-11
COBS06986	32.6416	0.934539	0.165559	5.64475	1.65426e-08	2.1251e-07
COBS00092	23.5198	0.931668	0.169084	5.51009	3.58646e-08	4.3245e-07
COBS13442	37.0032	0.929837	0.149964	6.2004	5.63193e-10	9.74793e-09
COBS07633	106.855	0.929231	0.215104	4.31991	1.56096e-05	0.000104562
COBS18326	18.0554	0.926467	0.246665	3.75597	0.000172671	0.000859181
COBS16578	27.9503	0.925893	0.197082	4.69802	2.62694e-06	2.12453e-05
COBS06856	109.589	0.92574	0.13073	7.0813	1.42806e-12	3.8283e-11
COBS17026	26.7618	0.925047	0.233526	3.96122	7.45673e-05	0.000409535
COBS15883	17.2684	0.924294	0.241687	3.82435	0.000131119	0.000672155
COBS06349	227.824	0.922581	0.0812927	11.3489	7.51173e-30	2.06167e-27
COBS19372	30.3806	0.922418	0.150889	6.11322	9.76431e-10	1.61577e-08
COBS11609	250.117	0.922027	0.166762	5.52899	3.22075e-08	3.92737e-07
COBS08992	88.6497	0.921601	0.139834	6.59067	4.37846e-11	8.99145e-10
COBS00073	36.5617	0.921036	0.232096	3.96833	7.23768e-05	0.000398938
COBS05941	144.773	0.921002	0.137179	6.71387	1.89535e-11	4.13272e-10
COBS12419	61.6785	0.920668	0.177083	5.19907	2.00284e-07	2.06261e-06
COBS05971	80.6741	0.918882	0.130886	7.02048	2.21108e-12	5.71476e-11
COBS11203	21.4416	0.917717	0.231214	3.96913	7.21355e-05	0.00039829
COBS15301	18.6618	0.917	0.218111	4.20427	2.61925e-05	0.000164989
COBS13182	29.7689	0.914083	0.165748	5.51488	3.4901e-08	4.22897e-07
COBS05939	97.6846	0.913829	0.194863	4.6896	2.73745e-06	2.20155e-05
COBS06143	77.8358	0.91343	0.158581	5.76001	8.41105e-09	1.14735e-07
COBS02173	49.4511	0.908786	0.209389	4.34018	1.42364e-05	9.60071e-05
COBS08912	17.1536	0.907942	0.207886	4.36751	1.25671e-05	8.58887e-05
COBS18611	18.0803	0.907666	0.202309	4.48654	7.23889e-06	5.268e-05
COBS11057	30.1819	0.906278	0.220264	4.11451	3.8801e-05	0.000232793
COBS17000	12.8057	0.905993	0.233365	3.8823	0.000103472	0.000545966
COBS15256	295.181	0.904042	0.191001	4.73318	2.21035e-06	1.81996e-05
COBS16518	58.9546	0.903979	0.149476	6.04767	1.46956e-09	2.37034e-08
COBS13451	90.7945	0.903375	0.146429	6.16937	6.85636e-10	1.16801e-08
COBS06430	195.192	0.903319	0.117396	7.69461	1.4193e-14	4.98804e-13
COBS03219	486.608	0.902836	0.107707	8.38232	5.18954e-17	2.66268e-15
COBS15090	13.0085	0.901059	0.203278	4.43263	9.30894e-06	6.56984e-05
COBS05039	38.9639	0.900869	0.20991	4.29168	1.77325e-05	0.000117386
COBS15564	36.3445	0.900846	0.217236	4.14686	3.37063e-05	0.000205869
COBS11453	32.4233	0.900636	0.229623	3.92224	8.77279e-05	0.000471821
COBS18593	34.4341	0.89923	0.210546	4.27094	1.94653e-05	0.000127345
COBS02142	299.413	0.897541	0.238502	3.76324	0.000167725	0.000837591
COBS08894	29.249	0.890342	0.168456	5.28531	1.25493e-07	1.34609e-06
COBS15402	62.1282	0.889923	0.234807	3.79002	0.000150634	0.000761087
COBS05924	64.2853	0.88862	0.197413	4.50133	6.75282e-06	4.95809e-05
COBS04709	60.3295	0.888534	0.145558	6.10434	1.03228e-09	1.70154e-08
COBS10781	739.407	0.887988	0.0942514	9.42149	4.44751e-21	4.15686e-19
COBS10466	104.876	0.887763	0.226874	3.91302	9.11478e-05	0.000488542
COBS06642	323.202	0.887708	0.14733	6.02532	1.68776e-09	2.68721e-08
COBS18174	52.4325	0.886653	0.145575	6.09069	1.12424e-09	1.84432e-08
COBS13816	19.3242	0.886605	0.202225	4.38425	1.16387e-05	8.04622e-05
COBS09265	10.4321	0.883801	0.22548	3.91965	8.86778e-05	0.000476337
COBS03368	413.825	0.883536	0.104769	8.43315	3.36492e-17	1.77929e-15
COBS02647	33.6743	0.882961	0.223734	3.94647	7.93108e-05	0.000432198
COBS10501	58.0106	0.882291	0.165126	5.34312	9.13607e-08	1.00683e-06
COBS12213	38.8612	0.880252	0.193489	4.54936	5.38102e-06	4.03834e-05
COBS16387	523.413	0.879679	0.0550707	15.9736	1.95104e-57	3.74838e-54
COBS13193	35.1995	0.878926	0.203106	4.32742	1.50866e-05	0.000101227
COBS17250	159.032	0.878767	0.106391	8.25982	1.45891e-16	6.91122e-15
COBS16223	682.932	0.877501	0.0581997	15.0774	2.28027e-51	2.62855e-48
COBS10463	32.8361	0.876895	0.146287	5.99435	2.04306e-09	3.19988e-08
COBS01967	22.0864	0.876484	0.204983	4.27588	1.90383e-05	0.000124788
COBS01044	119.789	0.875148	0.209953	4.16831	3.06866e-05	0.00019018
COBS16087	4024.1	0.874888	0.0728917	12.0026	3.44386e-33	1.32329e-30
COBS17129	256.997	0.874774	0.230441	3.79608	0.000147003	0.00074475
COBS10174	41.4871	0.87274	0.224613	3.88552	0.00010211	0.000540202
COBS19443	63.3364	0.871832	0.169486	5.14398	2.68981e-07	2.6972e-06
COBS10446	38.6141	0.871831	0.204931	4.25426	2.09737e-05	0.000136388
COBS02892	25.4308	0.87057	0.186762	4.66139	3.14075e-06	2.48543e-05
COBS13177	17.0628	0.868395	0.233767	3.71479	0.00020337	0.00098805
COBS03117	240.347	0.867742	0.217126	3.99649	6.4288e-05	0.000360676
COBS05623	61.0911	0.867252	0.138831	6.24682	4.18901e-10	7.38351e-09
COBS06844	17.4056	0.866747	0.194788	4.44971	8.59881e-06	6.12112e-05
COBS05797	3325.48	0.865621	0.0919335	9.41573	4.69809e-21	4.3441e-19
COBS19335	41.677	0.865087	0.19371	4.46589	7.97362e-06	5.73749e-05
COBS16235	53.0673	0.864502	0.121639	7.10709	1.18513e-12	3.24243e-11
COBS09466	106.224	0.863762	0.184762	4.67499	2.93966e-06	2.34671e-05
COBS11567	584.051	0.86306	0.178421	4.83721	1.31676e-06	1.13443e-05
COBS19417	88.1435	0.862755	0.208039	4.14708	3.36741e-05	0.000205745
COBS09096	55.178	0.862302	0.179473	4.80464	1.5503e-06	1.31532e-05
COBS08765	46.8674	0.859756	0.165067	5.20853	1.90346e-07	1.97201e-06
COBS07399	325.398	0.859377	0.207475	4.14208	3.44165e-05	0.000209836
COBS10938	24.7277	0.858273	0.187235	4.58395	4.5628e-06	3.47864e-05
COBS14314	81.6216	0.857922	0.155717	5.50949	3.59885e-08	4.33341e-07
COBS12867	1841.93	0.85503	0.19034	4.49211	7.05195e-06	5.15147e-05
COBS06505	62.1927	0.854021	0.136576	6.25309	4.02403e-10	7.14312e-09
COBS05911	17.4079	0.853294	0.2185	3.90524	9.41318e-05	0.000502356
COBS02585	25.6231	0.852727	0.189843	4.49175	7.06394e-06	5.15804e-05
COBS06227	899.552	0.852713	0.210544	4.05006	5.12051e-05	0.000296116
COBS00471	34.1875	0.85209	0.199273	4.276	1.90282e-05	0.000124769
COBS00795	1343.08	0.851676	0.17649	4.82564	1.39555e-06	1.1934e-05
COBS17817	17.775	0.851037	0.222263	3.82896	0.000128684	0.000660649
COBS14172	335.396	0.850175	0.158785	5.35424	8.59162e-08	9.55347e-07
COBS12501	33.2662	0.849415	0.166814	5.092	3.54299e-07	3.47683e-06
COBS13867	61.4097	0.847591	0.136473	6.21071	5.27459e-10	9.17535e-09
COBS13764	38.2608	0.847527	0.16058	5.27791	1.30666e-07	1.39725e-06
COBS19153	429.441	0.846097	0.0989431	8.55135	1.21653e-17	6.96522e-16
COBS03877	417.872	0.84598	0.077795	10.8745	1.52519e-27	3.2965e-25
COBS10783	21.1812	0.845625	0.188473	4.48672	7.23292e-06	5.26587e-05
COBS03072	697.296	0.845419	0.150609	5.61333	1.9847e-08	2.51964e-07
COBS10399	373.09	0.845283	0.213516	3.95888	7.53025e-05	0.000412696
COBS19168	63.6272	0.84526	0.218872	3.86189	0.000112512	0.000588278
COBS02044	215.733	0.845234	0.176435	4.79061	1.66271e-06	1.40312e-05
COBS18248	69.8875	0.844302	0.137107	6.15796	7.36872e-10	1.24792e-08
COBS06746	84.5311	0.842765	0.201254	4.18757	2.81961e-05	0.000176453
COBS16181	38.1019	0.84209	0.225914	3.72748	0.000193405	0.000944414
COBS00291	20.5053	0.842084	0.187034	4.5023	6.72227e-06	4.93776e-05
COBS10080	35.7946	0.841949	0.162913	5.16807	2.36519e-07	2.40003e-06
COBS16388	116.451	0.841363	0.185464	4.53653	5.7187e-06	4.26584e-05
COBS17604	192.847	0.838969	0.145953	5.7482	9.01978e-09	1.22035e-07
COBS19448	20.7471	0.833751	0.192582	4.32933	1.49561e-05	0.000100468
COBS02342	312.711	0.833094	0.159085	5.23679	1.6339e-07	1.71223e-06
COBS19147	98.1959	0.831359	0.125879	6.60443	3.99059e-11	8.29343e-10
COBS08234	25.1867	0.830972	0.155183	5.35481	8.56485e-08	9.52992e-07
COBS16375	27.9977	0.828949	0.196075	4.22772	2.36077e-05	0.000150683
COBS00788	843.724	0.827172	0.0912501	9.06489	1.24732e-19	9.89333e-18
COBS02172	14.6758	0.825945	0.199439	4.14134	3.45278e-05	0.000210274
COBS15562	58.941	0.824195	0.181665	4.53691	5.70857e-06	4.26196e-05
COBS17704	679.237	0.823286	0.133838	6.15137	7.68158e-10	1.29583e-08
COBS12469	307.299	0.823264	0.187214	4.39744	1.09537e-05	7.60746e-05
COBS16250	104.533	0.822583	0.178044	4.62011	3.8354e-06	2.9739e-05
COBS18335	366.007	0.821181	0.188048	4.36688	1.26037e-05	8.60703e-05
COBS09468	98.3752	0.820861	0.100768	8.14604	3.76029e-16	1.69321e-14
COBS10965	16.1495	0.820455	0.196939	4.16603	3.09953e-05	0.000191544
COBS03837	1971.36	0.820194	0.111304	7.36898	1.71944e-13	5.24352e-12
COBS10949	36.3687	0.819772	0.20203	4.05766	4.95664e-05	0.000288085
COBS13800	258.533	0.819632	0.106444	7.70012	1.35939e-14	4.79698e-13
COBS11451	13.2421	0.819173	0.212531	3.85437	0.000116029	0.000603746
COBS02681	30.0497	0.818558	0.190726	4.2918	1.77227e-05	0.000117366
COBS00451	40.3528	0.818222	0.202747	4.03567	5.44463e-05	0.000311939
COBS11365	34.0042	0.817861	0.220051	3.71669	0.000201853	0.000980958
COBS00756	91.8507	0.817543	0.202339	4.04047	5.33443e-05	0.000307151
COBS03036	166.643	0.817226	0.102831	7.94728	1.90652e-15	7.63094e-14
COBS17667	5224.76	0.81658	0.116093	7.03386	2.00894e-12	5.23931e-11
COBS09133	26.2659	0.81592	0.185546	4.39741	1.09552e-05	7.60746e-05
COBS01719	856.132	0.815554	0.0981218	8.31165	9.43767e-17	4.62285e-15
COBS10217	28.0166	0.808973	0.209687	3.858	0.000114318	0.000596283
COBS01904	435.12	0.807978	0.0712934	11.3331	8.99261e-30	2.42955e-27
COBS07189	48.2706	0.807628	0.180369	4.47765	7.54705e-06	5.46466e-05
COBS10086	44.8634	0.80517	0.139964	5.7527	8.78274e-09	1.19577e-07
COBS06972	424.032	0.804559	0.0955819	8.41748	3.84663e-17	2.02164e-15
COBS11704	849.883	0.804267	0.142666	5.63742	1.72617e-08	2.2109e-07
COBS12428	46.3291	0.803899	0.161686	4.97198	6.62722e-07	6.08234e-06
COBS04013	22.1878	0.802669	0.193621	4.14556	3.38977e-05	0.000206965
COBS08214	106.38	0.800521	0.123732	6.46979	9.81408e-11	1.90241e-09
COBS16136	71.8509	0.799168	0.147897	5.40355	6.53347e-08	7.45678e-07
COBS00321	55.214	0.798363	0.192802	4.14084	3.4603e-05	0.000210569
COBS10576	279.052	0.798341	0.118065	6.76186	1.36234e-11	3.05528e-10
COBS16779	1560.64	0.798024	0.137647	5.79762	6.72615e-09	9.46313e-08
COBS05128	79.5427	0.797718	0.211346	3.77447	0.000160348	0.000803555
COBS12557	1349.21	0.796013	0.0970889	8.19881	2.42779e-16	1.11055e-14
COBS09806	660.105	0.794511	0.0733362	10.8338	2.38034e-27	4.95885e-25
COBS02131	133.071	0.793971	0.10401	7.63358	2.2832e-14	7.83308e-13
COBS05438	836.863	0.793823	0.136026	5.8358	5.35325e-09	7.72647e-08
COBS13152	817.314	0.793287	0.13794	5.75095	8.87438e-09	1.2054e-07
COBS14093	43.3909	0.793022	0.18858	4.20524	2.60807e-05	0.000164411
COBS18062	284.366	0.792444	0.0878821	9.01713	1.9308e-19	1.50385e-17
COBS17412	241.245	0.79184	0.116845	6.77683	1.22844e-11	2.78753e-10
COBS17085	28.0419	0.79152	0.196027	4.03781	5.39515e-05	0.000309617
COBS00859	151.318	0.790409	0.108906	7.2577	3.93739e-13	1.13658e-11
COBS12584	27.586	0.790041	0.162782	4.85337	1.21382e-06	1.0534e-05
COBS00106	75.2441	0.789702	0.153359	5.14938	2.61354e-07	2.62737e-06
COBS17329	209.553	0.789641	0.140781	5.60902	2.03477e-08	2.57564e-07
COBS13964	32.9508	0.789209	0.205647	3.8377	0.000124195	0.000640265
COBS16913	1066.24	0.788806	0.0742898	10.618	2.45879e-26	4.67198e-24
COBS00190	690.33	0.787907	0.0604529	13.0334	7.90017e-39	5.69174e-36
COBS15391	48.3165	0.785577	0.154462	5.08588	3.65922e-07	3.57948e-06
COBS07432	162.232	0.785515	0.106635	7.3664	1.75296e-13	5.3311e-12
COBS16270	34.0086	0.785119	0.146873	5.34556	9.01394e-08	9.95275e-07
COBS13245	160.387	0.784797	0.202778	3.87022	0.000108735	0.000570259
COBS06727	137.273	0.784057	0.101793	7.70246	1.33469e-14	4.72912e-13
COBS14198	34.0569	0.784016	0.170997	4.58496	4.54067e-06	3.46378e-05
COBS18570	48.3368	0.78247	0.145222	5.38808	7.1214e-08	8.05865e-07
COBS15887	29.4134	0.782418	0.172905	4.52514	6.03548e-06	4.47679e-05
COBS16400	53.508	0.78156	0.122668	6.37133	1.87401e-10	3.47304e-09
COBS05369	426.333	0.781496	0.133078	5.87246	4.29364e-09	6.35084e-08
COBS04564	998.579	0.780818	0.101215	7.71446	1.21498e-14	4.35857e-13
COBS05914	618.813	0.780592	0.0831074	9.39257	5.8556e-21	5.3856e-19
COBS18421	49.9914	0.780316	0.151502	5.15052	2.59758e-07	2.61437e-06
COBS17920	775.352	0.78007	0.0820699	9.50495	2.0014e-21	1.96627e-19
COBS19264	27.2678	0.780024	0.170691	4.56979	4.88206e-06	3.69273e-05
COBS18066	889.438	0.77917	0.100076	7.78578	6.92843e-15	2.5653e-13
COBS01071	57.6147	0.779041	0.162778	4.78592	1.70207e-06	1.43493e-05
COBS01055	697.765	0.778989	0.114464	6.80552	1.00682e-11	2.31501e-10
COBS06819	36.2991	0.7781	0.192237	4.0476	5.17451e-05	0.000298939
COBS03784	77.4613	0.777226	0.158063	4.9172	8.77925e-07	7.86539e-06
COBS06843	893.102	0.775124	0.112643	6.88126	5.93244e-12	1.42667e-10
COBS06394	180.475	0.77448	0.200067	3.8711	0.000108345	0.000568517
COBS16092	106.055	0.774331	0.130237	5.94556	2.75511e-09	4.20835e-08
COBS04205	220.618	0.774273	0.109957	7.0416	1.90044e-12	4.97133e-11
COBS01383	4003.79	0.773874	0.0471868	16.4002	1.90542e-60	4.11833e-57
COBS14620	55.6865	0.773788	0.156329	4.94973	7.43172e-07	6.76682e-06
COBS05706	270.543	0.773553	0.132759	5.82675	5.65164e-09	8.10975e-08
COBS03192	1230.45	0.773311	0.0963827	8.02334	1.02907e-15	4.32934e-14
COBS19145	41.2355	0.770114	0.161629	4.76471	1.89125e-06	1.58055e-05
COBS14095	33.2375	0.769994	0.144042	5.34563	9.01028e-08	9.95275e-07
COBS03201	167.276	0.768047	0.110121	6.9746	3.0675e-12	7.78857e-11
COBS17140	44.5462	0.767661	0.190327	4.03338	5.49794e-05	0.000314576
COBS00260	108.048	0.766755	0.120211	6.37842	1.78927e-10	3.32669e-09
COBS16278	24.2086	0.7666	0.182556	4.19927	2.67779e-05	0.00016837
COBS10630	111.195	0.764831	0.152564	5.0132	5.3533e-07	5.01701e-06
COBS16711	33.0067	0.764704	0.169845	4.50236	6.72016e-06	4.93776e-05
COBS14200	58.4999	0.763941	0.189704	4.02703	5.64869e-05	0.000322027
COBS14736	26.3572	0.763784	0.175423	4.35397	1.33695e-05	9.07628e-05
COBS18718	127.529	0.76318	0.166567	4.58181	4.60962e-06	3.5066e-05
COBS09664	96.9034	0.762602	0.150039	5.08268	3.72147e-07	3.63753e-06
COBS02501	403.403	0.762039	0.139505	5.46245	4.696e-08	5.52372e-07
COBS07172	736.936	0.76193	0.0864304	8.81554	1.19108e-18	8.10822e-17
COBS13815	28.5526	0.761483	0.166045	4.58601	4.51798e-06	3.44903e-05
COBS04506	394.391	0.761246	0.146168	5.20801	1.9088e-07	1.97517e-06
COBS16073	42.0236	0.760887	0.137098	5.54995	2.85758e-08	3.52428e-07
COBS08598	35.4185	0.760776	0.192626	3.9495	7.83151e-05	0.00042731
COBS19074	164.567	0.76037	0.156488	4.85897	1.17996e-06	1.02836e-05
COBS03591	132.604	0.759532	0.179933	4.2212	2.43008e-05	0.000154537
COBS11188	1983.53	0.758471	0.152714	4.96661	6.81338e-07	6.24325e-06
COBS12580	40.6972	0.754245	0.161817	4.6611	3.14524e-06	2.48754e-05
COBS06375	112.235	0.754105	0.134366	5.61231	1.99639e-08	2.5289e-07
COBS14207	29.5465	0.753946	0.188254	4.00493	6.20354e-05	0.000349399
COBS08826	24.9323	0.753118	0.18545	4.06102	4.88584e-05	0.000284257
COBS10957	28.9101	0.751666	0.18059	4.16228	3.1508e-05	0.000194088
COBS19807	142.862	0.751218	0.156668	4.79498	1.62694e-06	1.37562e-05
COBS04938	87.2628	0.751199	0.119621	6.27982	3.38957e-10	6.07347e-09
COBS06065	33.9865	0.75118	0.157711	4.76302	1.90717e-06	1.59155e-05
COBS14206	28.3705	0.75107	0.182554	4.11425	3.88443e-05	0.000232972
COBS08608	538.571	0.75034	0.0777342	9.65263	4.7911e-22	5.3447e-20
COBS14556	20.1124	0.750296	0.163285	4.59501	4.32736e-06	3.3211e-05
COBS14186	84.8089	0.749817	0.107388	6.9823	2.90384e-12	7.38387e-11
COBS05142	39.8233	0.746502	0.164015	4.55144	5.32798e-06	4.002e-05
COBS14629	82.3955	0.745934	0.18207	4.09696	4.18606e-05	0.000248647
COBS07292	34.976	0.745267	0.153538	4.85396	1.21021e-06	1.05102e-05
COBS13527	56.5166	0.744779	0.198462	3.75276	0.000174901	0.000867533
COBS19566	15.1882	0.743041	0.199618	3.72231	0.000197406	0.000961234
COBS07990	705.228	0.741437	0.057344	12.9296	3.06265e-38	2.03678e-35
COBS16395	72.2518	0.740399	0.177101	4.18066	2.90663e-05	0.000181504
COBS12328	21.3314	0.740365	0.183321	4.03862	5.3766e-05	0.000309065
COBS17438	402.303	0.738588	0.0806008	9.16353	5.02275e-20	4.09662e-18
COBS05467	573.557	0.737746	0.122907	6.00248	1.94323e-09	3.05735e-08
COBS15664	22.7354	0.735943	0.196127	3.75239	0.000175159	0.000868561
COBS06019	1691.28	0.735434	0.0561241	13.1037	3.13525e-39	2.35703e-36
COBS16694	49.6814	0.735393	0.185714	3.95982	7.50078e-05	0.000411211
COBS11371	384.638	0.734543	0.146853	5.00191	5.67653e-07	5.27703e-06
COBS09444	71.0509	0.734306	0.147095	4.99206	5.97376e-07	5.51775e-06
COBS19518	81.0883	0.73294	0.14913	4.91476	8.88931e-07	7.95987e-06
COBS07387	58.1245	0.731703	0.168813	4.3344	1.46156e-05	9.84103e-05
COBS07786	1866.61	0.730893	0.0821145	8.9009	5.53948e-19	3.99096e-17
COBS13766	102.126	0.730034	0.164427	4.43988	9.00096e-06	6.37068e-05
COBS19520	41.9908	0.729539	0.172794	4.22202	2.42121e-05	0.000154029
COBS07385	79.334	0.728581	0.128266	5.68024	1.34508e-08	1.76731e-07
COBS01530	62.9877	0.728548	0.146777	4.96363	6.91889e-07	6.33322e-06
COBS00761	223.784	0.727768	0.190568	3.81893	0.000134032	0.000684447
COBS16112	6040.97	0.727299	0.171978	4.22903	2.34703e-05	0.000149917
COBS15517	122.898	0.727166	0.181323	4.01033	6.06329e-05	0.000342503
COBS00813	3544.57	0.725235	0.119249	6.08167	1.18941e-09	1.9457e-08
COBS14575	1538.77	0.72495	0.147248	4.92333	8.50855e-07	7.65061e-06
COBS15153	575.894	0.72487	0.169136	4.28573	1.82141e-05	0.000119931
COBS06340	67.1707	0.724563	0.144232	5.02359	5.07134e-07	4.78649e-06
COBS10770	343.781	0.723407	0.185742	3.89468	9.83283e-05	0.000522494
COBS19040	1147.62	0.723206	0.0875165	8.26365	1.4128e-16	6.71121e-15
COBS03788	194.802	0.722117	0.0923631	7.81823	5.35694e-15	2.01363e-13
COBS11505	270.224	0.721531	0.1572	4.58989	4.43472e-06	3.38995e-05
COBS15942	162.847	0.720744	0.123265	5.84711	5.00184e-09	7.29231e-08
COBS12383	69.5669	0.719979	0.153834	4.68024	2.86539e-06	2.2959e-05
COBS02336	74.0555	0.719053	0.109021	6.59557	4.23627e-11	8.76188e-10
COBS16741	47.7598	0.718556	0.130756	5.49538	3.89862e-08	4.65546e-07
COBS13966	200.604	0.717591	0.144973	4.94982	7.42832e-07	6.76682e-06
COBS05784	16.2901	0.717511	0.188979	3.79678	0.000146585	0.00074285
COBS03833	257.226	0.717299	0.119718	5.99159	2.07802e-09	3.25168e-08
COBS10709	522.661	0.716868	0.0627389	11.4262	3.09304e-30	8.91363e-28
COBS10213	22.8039	0.716258	0.178073	4.02228	5.76385e-05	0.000327757
COBS12498	63.256	0.714703	0.152354	4.69107	2.71779e-06	2.18879e-05
COBS06256	34.6151	0.714285	0.146623	4.87158	1.1071e-06	9.71721e-06
COBS05041	60.236	0.712141	0.182497	3.90221	9.53197e-05	0.000508068
COBS14596	463.377	0.710352	0.0913277	7.77806	7.36475e-15	2.70944e-13
COBS15661	1831.32	0.7102	0.160751	4.41801	9.96131e-06	6.99598e-05
COBS13213	31.9891	0.709777	0.17901	3.96501	7.33943e-05	0.000403645
COBS12986	174.273	0.70926	0.0932264	7.60793	2.78519e-14	9.38768e-13
COBS08254	92.1519	0.709236	0.154992	4.57594	4.74092e-06	3.59856e-05
COBS13511	41.5845	0.708801	0.154594	4.58493	4.54131e-06	3.46378e-05
COBS04971	149.772	0.708587	0.126961	5.58113	2.38966e-08	2.992e-07
COBS14821	38.2666	0.707801	0.187335	3.77826	0.000157926	0.000792653
COBS05698	728.181	0.706254	0.0721746	9.78535	1.3015e-22	1.54139e-20
COBS01191	967.575	0.706134	0.0809034	8.72812	2.58937e-18	1.65213e-16
COBS01005	138.017	0.705603	0.155543	4.53637	5.72308e-06	4.26726e-05
COBS05691	220.397	0.705037	0.0874471	8.06244	7.47862e-16	3.18505e-14
COBS03373	56.4713	0.703766	0.184694	3.81044	0.000138719	0.0007063
COBS11919	309.202	0.703711	0.0996694	7.06045	1.65966e-12	4.38794e-11
COBS15446	35.0932	0.70338	0.163871	4.29229	1.76842e-05	0.000117201
COBS17544	107.897	0.703376	0.134167	5.24254	1.58381e-07	1.66381e-06
COBS18680	172.202	0.703131	0.10015	7.02076	2.20672e-12	5.71204e-11
COBS19756	160.096	0.701783	0.126804	5.53441	3.12274e-08	3.83217e-07
COBS14101	19.4074	0.700703	0.149309	4.69298	2.69249e-06	2.17246e-05
COBS12360	61.2651	0.698707	0.117322	5.95546	2.59349e-09	3.98914e-08
COBS12206	819.735	0.697694	0.142225	4.90557	9.31582e-07	8.32454e-06
COBS15874	86.5869	0.697375	0.114391	6.09639	1.08488e-09	1.78315e-08
COBS19434	456.371	0.697277	0.14775	4.71929	2.36666e-06	1.94035e-05
COBS04928	181.88	0.69659	0.102225	6.81431	9.47201e-12	2.18374e-10
COBS17263	140.945	0.694735	0.104288	6.6617	2.70683e-11	5.79254e-10
COBS17430	912.692	0.694141	0.175937	3.9454	7.96659e-05	0.000433628
COBS18543	115.588	0.694032	0.17755	3.90894	9.27036e-05	0.000495959
COBS09712	841.977	0.693953	0.113325	6.12358	9.14944e-10	1.52558e-08
COBS05318	238.794	0.693727	0.082067	8.45319	2.83458e-17	1.53645e-15
COBS17214	262.226	0.693567	0.0892082	7.7747	7.56252e-15	2.7763e-13
COBS11142	268.799	0.693495	0.100097	6.92825	4.26074e-12	1.0612e-10
COBS05862	50.3404	0.692972	0.147717	4.69122	2.7158e-06	2.18821e-05
COBS16485	1623.06	0.692776	0.0943554	7.3422	2.10116e-13	6.31846e-12
COBS14199	30.7049	0.692237	0.164329	4.21252	2.52541e-05	0.000160069
COBS15344	519.12	0.691906	0.120451	5.74432	9.22929e-09	1.24383e-07
COBS09470	63.517	0.69175	0.130617	5.29601	1.18361e-07	1.27354e-06
COBS06885	35.2647	0.690771	0.149766	4.61234	3.9816e-06	3.07623e-05
COBS08744	57.6729	0.690474	0.143236	4.82054	1.4317e-06	1.22009e-05
COBS04723	37.5999	0.69038	0.180574	3.82325	0.000131702	0.000674745
COBS11941	1552.65	0.68881	0.125532	5.48711	4.08558e-08	4.85858e-07
COBS14190	40.9688	0.688538	0.16216	4.24604	2.17578e-05	0.000140536
COBS03609	30.9571	0.683374	0.176969	3.86156	0.000112666	0.00058891
COBS02391	123.215	0.682271	0.128211	5.32145	1.02945e-07	1.12233e-06
COBS18623	2161.25	0.681769	0.132077	5.16192	2.44432e-07	2.47162e-06
COBS04746	633.586	0.681655	0.0842477	8.09109	5.91355e-16	2.58864e-14
COBS12553	165.309	0.68165	0.136284	5.00167	5.6835e-07	5.28068e-06
COBS06906	897.973	0.680767	0.130046	5.23481	1.65154e-07	1.72862e-06
COBS15558	34.3432	0.680516	0.163108	4.17219	3.01687e-05	0.000187541
COBS07138	23.8712	0.67969	0.181299	3.74901	0.000177534	0.000879079
COBS13292	12773.8	0.67837	0.147418	4.60167	4.19119e-06	3.22375e-05
COBS05868	984.856	0.678112	0.0599786	11.3059	1.22699e-29	3.26397e-27
COBS12196	27.4494	0.677898	0.170068	3.98604	6.71863e-05	0.000374627
COBS16378	61.9638	0.677342	0.16093	4.20891	2.56608e-05	0.000162112
COBS07256	314.138	0.676765	0.0804745	8.40969	4.1111e-17	2.14111e-15
COBS08506	42.9081	0.675225	0.1537	4.39315	1.1172e-05	7.74248e-05
COBS04934	417.278	0.674809	0.0979152	6.89176	5.51044e-12	1.33634e-10
COBS07570	33.6065	0.674666	0.166848	4.04359	5.26391e-05	0.000303698
COBS18945	36.2429	0.674634	0.16612	4.06113	4.88351e-05	0.000284257
COBS01361	6051.02	0.674058	0.0857005	7.86528	3.68284e-15	1.40574e-13
COBS17037	141.326	0.673718	0.137551	4.89796	9.68364e-07	8.61759e-06
COBS05379	249.151	0.67357	0.0820073	8.21354	2.14767e-16	9.98262e-15
COBS11721	245.273	0.67341	0.0832185	8.09207	5.86615e-16	2.57441e-14
COBS00288	48.9216	0.672992	0.179304	3.75336	0.000174479	0.000865935
COBS15607	20.0285	0.671888	0.160999	4.17325	3.00283e-05	0.000186971
COBS02891	87.5325	0.671694	0.140986	4.76426	1.89546e-06	1.58266e-05
COBS01885	313.924	0.671678	0.083049	8.08773	6.07852e-16	2.65154e-14
COBS16323	450.016	0.67142	0.0776031	8.65198	5.06141e-18	3.06003e-16
COBS08375	1317.12	0.67124	0.0780973	8.59491	8.33303e-18	4.88429e-16
COBS10146	30.7729	0.668367	0.170821	3.91266	9.12834e-05	0.000489117
COBS03746	21.3407	0.667941	0.164257	4.06645	4.77351e-05	0.000278753
COBS12091	1481.19	0.667914	0.0839889	7.9524	1.82926e-15	7.40744e-14
COBS12953	193.653	0.666603	0.105114	6.34169	2.27262e-10	4.17154e-09
COBS15549	51.0024	0.665962	0.138066	4.82351	1.41057e-06	1.20386e-05
COBS07390	28.4091	0.665383	0.172702	3.85277	0.000116788	0.00060715
COBS07326	24.8144	0.664863	0.156574	4.24631	2.17323e-05	0.000140424
COBS08158	53.7049	0.664606	0.166187	3.99915	6.35696e-05	0.000357565
COBS14091	660.753	0.662797	0.0689993	9.60586	7.55256e-22	8.11126e-20
COBS14956	50.9966	0.6626	0.115313	5.74611	9.13192e-09	1.23263e-07
COBS06791	175.97	0.662183	0.100421	6.59408	4.27899e-11	8.8186e-10
COBS18574	43.1546	0.662156	0.177676	3.72676	0.000193958	0.000946844
COBS09440	79.5541	0.66172	0.154304	4.2884	1.79961e-05	0.000118722
COBS11266	1562.53	0.661626	0.0674621	9.80738	1.04647e-22	1.26535e-20
COBS19273	847.54	0.661528	0.124052	5.33268	9.67746e-08	1.06311e-06
COBS19720	898.298	0.660497	0.0957083	6.90115	5.15833e-12	1.26157e-10
COBS18854	35.6444	0.660125	0.136178	4.84753	1.25011e-06	1.08295e-05
COBS07290	124.094	0.659483	0.153188	4.30505	1.66945e-05	0.000111068
COBS11152	41.3365	0.658374	0.164837	3.99408	6.49452e-05	0.000363673
COBS13302	55.0208	0.658197	0.16914	3.89143	9.96534e-05	0.000528885
COBS09158	158.196	0.655689	0.107105	6.12195	9.24379e-10	1.53835e-08
COBS02916	670.527	0.655243	0.0713292	9.18618	4.07049e-20	3.40014e-18
COBS01641	267.248	0.654656	0.0989869	6.61355	3.75199e-11	7.86371e-10
COBS04927	94.9221	0.654335	0.166154	3.93813	8.212e-05	0.000444703
COBS06982	57.5343	0.653634	0.1665	3.92572	8.64705e-05	0.000466073
COBS01506	149.994	0.653326	0.0962566	6.78733	1.14227e-11	2.61257e-10
COBS16165	68.4036	0.653321	0.146184	4.46917	7.85246e-06	5.65973e-05
COBS02356	1711.18	0.653045	0.0599192	10.8988	1.16821e-27	2.65782e-25
COBS17218	952.571	0.652852	0.0630663	10.3518	4.10543e-25	6.6343e-23
COBS05294	427.214	0.65245	0.12064	5.40825	6.36452e-08	7.29284e-07
COBS10883	506.943	0.652204	0.0821769	7.93659	2.07821e-15	8.26076e-14
COBS15323	1279.97	0.651762	0.109669	5.94298	2.79884e-09	4.26011e-08
COBS04637	1462.52	0.651468	0.159722	4.07877	4.52755e-05	0.000266449
COBS07594	309.996	0.651015	0.156921	4.14869	3.34382e-05	0.000204376
COBS14672	66.4529	0.650994	0.132024	4.9309	8.1853e-07	7.38299e-06
COBS03238	45.2868	0.650577	0.174163	3.73545	0.00018738	0.000920191
COBS07563	743.92	0.650375	0.100298	6.48441	8.90782e-11	1.73452e-09
COBS14621	50.402	0.649801	0.170048	3.82129	0.000132757	0.000678943
COBS14525	44.8177	0.648947	0.139562	4.64989	3.32107e-06	2.61258e-05
COBS19409	222.66	0.648885	0.152563	4.25323	2.10705e-05	0.000136966
COBS12410	1120.77	0.648314	0.110645	5.85941	4.64525e-09	6.81265e-08
COBS02045	2961.79	0.647796	0.117629	5.50711	3.64776e-08	4.38619e-07
COBS06993	56.7387	0.646278	0.152217	4.24577	2.17847e-05	0.000140588
COBS17098	34.8037	0.646051	0.150247	4.29994	1.70847e-05	0.000113489
COBS10178	358.848	0.645754	0.0936006	6.89904	5.2356e-12	1.27865e-10
COBS09189	818.578	0.64567	0.130461	4.94914	7.45404e-07	6.78e-06
COBS10091	1398.91	0.644797	0.0720406	8.95047	3.53967e-19	2.62341e-17
COBS11068	278.175	0.644086	0.110315	5.8386	5.26402e-09	7.61674e-08
COBS08989	211.087	0.643088	0.155783	4.1281	3.6577e-05	0.000220983
COBS19208	127.374	0.642341	0.119353	5.38185	7.37229e-08	8.2991e-07
COBS03094	44.2082	0.642054	0.140704	4.56315	5.03911e-06	3.79988e-05
COBS13214	49.2189	0.642046	0.154369	4.15917	3.1941e-05	0.000196127
COBS11639	79.514	0.641379	0.148038	4.33253	1.47404e-05	9.92122e-05
COBS09131	215.589	0.640927	0.10495	6.10699	1.01528e-09	1.67832e-08
COBS06240	239.784	0.64044	0.106112	6.03552	1.58448e-09	2.53209e-08
COBS19466	555.232	0.640416	0.11615	5.51369	3.51393e-08	4.25188e-07
COBS00071	356.094	0.64	0.163945	3.90376	9.47106e-05	0.000505289
COBS12898	177.729	0.639024	0.115715	5.5224	3.34402e-08	4.06335e-07
COBS19472	223.182	0.638377	0.12643	5.04924	4.43577e-07	4.25869e-06
COBS08468	152.989	0.638353	0.0811446	7.86685	3.6367e-15	1.39239e-13
COBS05773	100.659	0.637776	0.131032	4.86732	1.13123e-06	9.91891e-06
COBS05370	41.9906	0.637614	0.151077	4.22046	2.43802e-05	0.000154985
COBS01058	2258.31	0.637405	0.0713562	8.93271	4.15697e-19	3.03283e-17
COBS11355	173.159	0.637289	0.103086	6.18209	6.32582e-10	1.08297e-08
COBS14572	192.557	0.636707	0.16352	3.89376	9.87028e-05	0.000524323
COBS19213	54.9938	0.636021	0.163938	3.87965	0.000104605	0.000550938
COBS09173	31.4433	0.635377	0.156318	4.06465	4.81042e-05	0.00028053
COBS12565	101.251	0.634945	0.109702	5.78789	7.12778e-09	9.94135e-08
COBS13744	775.112	0.63468	0.0743165	8.54022	1.33969e-17	7.61991e-16
COBS17364	2859.64	0.633839	0.114872	5.51781	3.43245e-08	4.16202e-07
COBS06529	2216.05	0.633096	0.0720164	8.79101	1.48224e-18	9.81967e-17
COBS09777	143.311	0.631713	0.139468	4.52945	5.91371e-06	4.39235e-05
COBS13888	246.438	0.630896	0.125564	5.02448	5.0481e-07	4.76976e-06
COBS04431	30.2636	0.630529	0.146996	4.28941	1.79145e-05	0.000118229
COBS13179	258.672	0.630201	0.116623	5.40375	6.52617e-08	7.45678e-07
COBS06568	500.438	0.629256	0.078054	8.06181	7.5175e-16	3.19374e-14
COBS07628	128.449	0.628247	0.151918	4.13544	3.54275e-05	0.000214864
COBS06729	61.9253	0.626851	0.147694	4.24426	2.19315e-05	0.000141288
COBS09218	5970.17	0.626536	0.0927265	6.75682	1.41051e-11	3.15512e-10
COBS03210	80.9664	0.626475	0.127032	4.93162	8.15493e-07	7.35944e-06
COBS11982	402.975	0.624119	0.151444	4.12112	3.77027e-05	0.000226833
COBS14310	97.8225	0.623463	0.153153	4.07086	4.68398e-05	0.000273987
COBS14181	410.747	0.623057	0.0856431	7.27505	3.46304e-13	1.00977e-11
COBS16156	159.809	0.622267	0.133238	4.67035	3.00691e-06	2.39156e-05
COBS18073	747.228	0.622014	0.0619645	10.0382	1.03505e-23	1.36619e-21
COBS02289	25.5665	0.621537	0.156911	3.96109	7.46074e-05	0.000409535
COBS06384	196.944	0.620922	0.0963733	6.44289	1.17223e-10	2.24502e-09
COBS17038	280.331	0.620816	0.0920923	6.74124	1.5704e-11	3.48125e-10
COBS03848	416.763	0.620567	0.0898332	6.908	4.91546e-12	1.21246e-10
COBS02735	51.9669	0.620169	0.166186	3.73179	0.000190128	0.00093183
COBS00094	70.0831	0.617875	0.117285	5.26814	1.37816e-07	1.46645e-06
COBS06783	248.007	0.616994	0.137562	4.48522	7.28397e-06	5.29635e-05
COBS12437	452.144	0.616856	0.0964227	6.39742	1.58029e-10	2.96364e-09
COBS19570	31.6315	0.61636	0.154751	3.98291	6.80766e-05	0.000379102
COBS05005	2093.24	0.616318	0.12083	5.10069	3.38424e-07	3.3305e-06
COBS14924	887.408	0.616205	0.0664259	9.27657	1.75017e-20	1.55191e-18
COBS12087	44.7985	0.61559	0.157509	3.90828	9.29568e-05	0.000497006
COBS14054	130.484	0.614957	0.130776	4.70238	2.57152e-06	2.08361e-05
COBS05616	58.7185	0.614662	0.134193	4.58042	4.64048e-06	3.52387e-05
COBS07717	3241.41	0.61462	0.0744298	8.25771	1.48497e-16	6.99633e-15
COBS19828	135.291	0.61396	0.150143	4.08916	4.32947e-05	0.000256022
COBS08575	1826.3	0.613457	0.0729809	8.40571	4.25263e-17	2.20156e-15
COBS00312	40.8517	0.613263	0.154612	3.96647	7.29439e-05	0.000401423
COBS13697	185.909	0.613059	0.115376	5.31358	1.07493e-07	1.16677e-06
COBS13134	49.8333	0.612628	0.124494	4.92096	8.61193e-07	7.73151e-06
COBS04108	21.7864	0.612604	0.162119	3.77873	0.000157627	0.000791846
COBS16047	835.014	0.612563	0.120823	5.06994	3.97943e-07	3.86564e-06
COBS13896	849.214	0.612133	0.0777791	7.87015	3.54202e-15	1.36708e-13
COBS14834	179.597	0.611956	0.146434	4.17906	2.92718e-05	0.00018259
COBS01934	151.96	0.610588	0.149838	4.07498	4.60191e-05	0.000270009
COBS19143	89.5515	0.61031	0.155056	3.93605	8.2832e-05	0.000447998
COBS09377	2045.96	0.609858	0.09648	6.32108	2.59734e-10	4.72246e-09
COBS09881	101.516	0.608963	0.158952	3.83112	0.000127561	0.000655471
COBS17195	737.856	0.608718	0.069233	8.7923	1.46531e-18	9.74489e-17
COBS10145	703.358	0.608616	0.066557	9.14428	6.00283e-20	4.873e-18
COBS08925	2441.51	0.608403	0.0973431	6.25008	4.10239e-10	7.25301e-09
COBS16444	169.883	0.608254	0.121602	5.00202	5.67332e-07	5.27689e-06
COBS12057	495.359	0.608074	0.115953	5.24413	1.57019e-07	1.65248e-06
COBS10802	174.12	0.608038	0.104819	5.80086	6.59738e-09	9.30468e-08
COBS04367	332.807	0.607705	0.147171	4.12924	3.63965e-05	0.000219969
COBS15322	280.03	0.607637	0.136525	4.45075	8.55722e-06	6.09654e-05
COBS12600	121.556	0.607249	0.159984	3.79569	0.000147235	0.000745485
COBS04981	1871.47	0.606556	0.0758059	8.00144	1.22976e-15	5.08701e-14
COBS00287	53.0854	0.606134	0.144358	4.19882	2.68308e-05	0.000168641
COBS09191	2351.09	0.605525	0.120763	5.01418	5.32608e-07	4.99421e-06
COBS09805	65.4579	0.605348	0.149704	4.04364	5.26277e-05	0.000303698
COBS17867	836.326	0.605082	0.0482179	12.5489	4.03021e-36	2.1777e-33
COBS10406	971.249	0.604999	0.119666	5.05574	4.28729e-07	4.14008e-06
COBS18655	114.25	0.603235	0.153526	3.92922	8.52225e-05	0.000459919
COBS07317	481.27	0.603127	0.119193	5.06009	4.19057e-07	4.05252e-06
COBS01397	1216.71	0.602116	0.104478	5.76309	8.25883e-09	1.1306e-07
COBS16269	137.943	0.601192	0.156008	3.85359	0.000116399	0.000605489
COBS15903	94.8002	0.601096	0.0898835	6.6875	2.2702e-11	4.88842e-10
COBS16930	1429.24	0.601006	0.0913869	6.5765	4.8166e-11	9.7981e-10
COBS09368	125.371	0.600358	0.105368	5.69771	1.21431e-08	1.60402e-07
COBS15772	30.1665	0.599497	0.151516	3.95667	7.60028e-05	0.000415875
COBS09465	81.8643	0.597842	0.159218	3.75486	0.000173435	0.000862299
COBS10036	49.8865	0.597389	0.139685	4.2767	1.89685e-05	0.000124472
COBS13753	522.073	0.597272	0.0771204	7.74467	9.5832e-15	3.47386e-13
COBS01154	419.736	0.597069	0.0892307	6.69129	2.21216e-11	4.7813e-10
COBS13278	668.42	0.596988	0.0765076	7.80299	6.04563e-15	2.25777e-13
COBS07886	2272.01	0.596739	0.0993964	6.00363	1.92951e-09	3.03854e-08
COBS05806	277.492	0.596602	0.087292	6.83456	8.22595e-12	1.91176e-10
COBS03606	56.6704	0.596599	0.135553	4.40121	1.07649e-05	7.49038e-05
COBS00226	239.986	0.596565	0.0805624	7.40501	1.31144e-13	4.07111e-12
COBS10039	101.636	0.596318	0.111419	5.35203	8.69715e-08	9.6399e-07
COBS08393	227.111	0.596219	0.102091	5.84007	5.21801e-09	7.56284e-08
COBS09855	1118.52	0.595406	0.0479805	12.4093	2.32564e-35	1.08683e-32
COBS05556	444.048	0.593607	0.159928	3.7117	0.000205871	0.000998519
COBS17677	483.892	0.593566	0.0864355	6.86716	6.5493e-12	1.55983e-10
COBS11110	2469.52	0.592974	0.0682926	8.68285	3.85983e-18	2.3751e-16
COBS15935	704.467	0.592944	0.0979426	6.054	1.41295e-09	2.28758e-08
COBS08147	1387.7	0.592728	0.149682	3.95991	7.49768e-05	0.000411172
COBS06834	136.008	0.592376	0.0861746	6.87414	6.2366e-12	1.49359e-10
COBS12525	584.695	0.592119	0.0667633	8.86893	7.38535e-19	5.21225e-17
COBS10933	52.1749	0.591645	0.139646	4.23676	2.26773e-05	0.000145496
COBS14269	21.9995	0.591106	0.151814	3.89363	9.87564e-05	0.000524446
COBS11803	455.92	0.590356	0.12601	4.685	2.79964e-06	2.24843e-05
COBS16755	754.018	0.589323	0.0611247	9.64133	5.34922e-22	5.85402e-20
COBS18103	1283.95	0.588676	0.103263	5.70074	1.19289e-08	1.57935e-07
COBS07185	258.299	0.588441	0.105615	5.57157	2.52451e-08	3.14944e-07
COBS14056	79.9628	0.587906	0.142034	4.1392	3.48517e-05	0.000211743
COBS13455	42.389	0.586493	0.157999	3.71201	0.000205623	0.000997595
COBS04379	735.11	0.585058	0.0950749	6.15366	7.57161e-10	1.27852e-08
COBS17226	68.555	0.5843	0.134529	4.34329	1.40365e-05	9.48457e-05
COBS03502	50.0149	0.584225	0.129146	4.52376	6.07516e-06	4.49874e-05
COBS09132	4064.36	0.58401	0.0496326	11.7667	5.79746e-32	2.13285e-29
COBS02004	231.128	0.583578	0.100253	5.82108	5.84686e-09	8.35521e-08
COBS15329	2485.17	0.583536	0.0632555	9.22506	2.83402e-20	2.40211e-18
COBS16420	1557.4	0.582888	0.0697772	8.35356	6.62336e-17	3.36837e-15
COBS05863	396.894	0.582267	0.0949113	6.13485	8.52385e-10	1.42678e-08
COBS08143	1268.76	0.582181	0.118269	4.9225	8.54443e-07	7.67489e-06
COBS06888	158.441	0.582052	0.0788942	7.37763	1.61131e-13	4.93119e-12
COBS11122	97.2424	0.581834	0.145887	3.98826	6.65595e-05	0.000371372
COBS18204	2117.35	0.58028	0.136487	4.25154	2.12305e-05	0.000137696
COBS10098	399.217	0.579592	0.145465	3.98442	6.76438e-05	0.000376935
COBS10108	135.717	0.577996	0.098744	5.85348	4.81395e-09	7.03024e-08
COBS15220	46.9155	0.57735	0.125422	4.60325	4.15947e-06	3.2022e-05
COBS04156	1975.99	0.577325	0.114734	5.03184	4.85783e-07	4.6152e-06
COBS17574	379.982	0.577281	0.0867811	6.65215	2.88841e-11	6.12803e-10
COBS02867	1065.1	0.577141	0.114368	5.04634	4.50356e-07	4.31897e-06
COBS09538	1809.96	0.576832	0.0535826	10.7653	5.02059e-27	1.00943e-24
COBS13628	1290.71	0.576081	0.104159	5.53078	3.18803e-08	3.89571e-07
COBS18626	550.897	0.575595	0.0712062	8.08351	6.29304e-16	2.72714e-14
COBS04251	705.262	0.575395	0.0996287	5.77539	7.67734e-09	1.06199e-07
COBS13240	45.0595	0.575299	0.133476	4.31013	1.63161e-05	0.000108759
COBS16084	154.882	0.574283	0.117486	4.88809	1.01819e-06	9.00079e-06
COBS02129	115.308	0.574226	0.112403	5.10865	3.24474e-07	3.20599e-06
COBS05964	1387.58	0.574134	0.0798069	7.19404	6.29036e-13	1.78599e-11
COBS05107	492.095	0.57362	0.106487	5.38676	7.17386e-08	8.1074e-07
COBS04079	3914.83	0.573367	0.0861545	6.6551	2.83102e-11	6.01365e-10
COBS03076	201.47	0.573141	0.0994704	5.76192	8.31611e-09	1.13671e-07
COBS18145	124.848	0.572932	0.142976	4.00718	6.14473e-05	0.000346312
COBS18417	71.6597	0.572859	0.142809	4.01136	6.03692e-05	0.000341237
COBS08215	33.4279	0.572584	0.133428	4.29134	1.776e-05	0.000117389
COBS10772	1246.29	0.572351	0.108553	5.27254	1.3455e-07	1.43612e-06
COBS02249	74.1886	0.572317	0.147411	3.88245	0.000103408	0.000545795
COBS07678	7952.45	0.571776	0.067515	8.46887	2.47792e-17	1.3525e-15
COBS01337	210.762	0.57083	0.129608	4.40427	1.06143e-05	7.3975e-05
COBS10106	2085.57	0.568187	0.0643823	8.8252	1.09262e-18	7.46737e-17
COBS13831	82.8801	0.567847	0.150818	3.76511	0.000166478	0.000832438
COBS11913	305.938	0.567616	0.107101	5.2998	1.15927e-07	1.25128e-06
COBS04288	60.5737	0.567215	0.125765	4.51012	6.47902e-06	4.77124e-05
COBS05496	461.999	0.566983	0.0779181	7.27666	3.42195e-13	9.99477e-12
COBS09380	404.173	0.565833	0.114489	4.94225	7.72269e-07	7.00593e-06
COBS03963	67.8893	0.565088	0.145978	3.87104	0.00010837	0.000568517
COBS10448	490.069	0.563934	0.112209	5.02575	5.01463e-07	4.74073e-06
COBS05323	121.434	0.563844	0.108736	5.18545	2.15491e-07	2.20216e-06
COBS10717	163.196	0.561964	0.141588	3.969	7.21736e-05	0.00039829
COBS09057	89.0307	0.561695	0.129073	4.35177	1.35042e-05	9.15694e-05
COBS06410	60.0152	0.559872	0.138971	4.0287	5.60867e-05	0.000320382
COBS01400	106.526	0.559498	0.141917	3.94244	8.06569e-05	0.000438704
COBS08378	477.756	0.559253	0.0988204	5.65929	1.52004e-08	1.97172e-07
COBS11908	126.833	0.558962	0.135571	4.12303	3.73916e-05	0.000225275
COBS00043	343.02	0.5588	0.11003	5.07864	3.80152e-07	3.70949e-06
COBS10669	56.2104	0.558641	0.12932	4.31985	1.56138e-05	0.000104562
COBS10321	47.1088	0.558413	0.130101	4.29216	1.76942e-05	0.000117222
COBS06581	6569.03	0.558125	0.118602	4.70588	2.52768e-06	2.05483e-05
COBS08729	225.723	0.557846	0.0824069	6.7694	1.29314e-11	2.91522e-10
COBS19429	393.63	0.557358	0.134607	4.14064	3.4634e-05	0.000210569
COBS06226	1026.74	0.556721	0.141504	3.93431	8.34348e-05	0.000450975
COBS12248	3934.85	0.556454	0.0652192	8.53205	1.43771e-17	8.15064e-16
COBS19790	1378.59	0.555978	0.0774515	7.1784	7.05294e-13	1.99269e-11
COBS06027	359.347	0.555517	0.109509	5.07279	3.92028e-07	3.81461e-06
COBS14189	96.8785	0.555404	0.136718	4.06242	4.85674e-05	0.000282944
COBS06868	83.1589	0.555239	0.142896	3.88561	0.000102075	0.000540202
COBS08887	131.784	0.554986	0.0978994	5.66894	1.43684e-08	1.88072e-07
COBS06851	699.082	0.554458	0.109208	5.07707	3.83307e-07	3.73606e-06
COBS03428	453.482	0.553943	0.0780434	7.09788	1.26686e-12	3.43343e-11
COBS16409	571.122	0.552973	0.0986301	5.60654	2.06412e-08	2.60706e-07
COBS15755	49.8193	0.552669	0.120301	4.59404	4.34753e-06	3.33362e-05
COBS02850	1012.69	0.55261	0.109319	5.05503	4.3032e-07	4.15216e-06
COBS06402	231.823	0.55239	0.13405	4.12078	3.77586e-05	0.000227011
COBS19762	419.497	0.552015	0.0577191	9.56382	1.13489e-21	1.17505e-19
COBS18094	1061.36	0.551718	0.0847936	6.5066	7.68693e-11	1.51729e-09
COBS12481	526.08	0.551584	0.0789807	6.98379	2.87326e-12	7.31688e-11
COBS17212	453.413	0.550826	0.0977662	5.63411	1.75962e-08	2.25208e-07
COBS19986	3006.57	0.550073	0.120432	4.5675	4.93565e-06	3.72836e-05
COBS15924	67.5822	0.549752	0.117125	4.69374	2.68261e-06	2.16651e-05
COBS06253	37.1669	0.549346	0.13879	3.95812	7.55432e-05	0.000413753
COBS00443	113.664	0.548504	0.141599	3.87363	0.000107225	0.000563534
COBS04893	934.532	0.547671	0.0647457	8.45881	2.70131e-17	1.46881e-15
COBS12617	756.691	0.547118	0.140444	3.89564	9.79391e-05	0.000520586
COBS05105	109.872	0.546915	0.118384	4.61982	3.8407e-06	2.97667e-05
COBS04964	630.894	0.546436	0.0944806	5.78358	7.31274e-09	1.01807e-07
COBS15372	145.349	0.545955	0.104753	5.21181	1.87007e-07	1.9409e-06
COBS17575	209.244	0.545082	0.136638	3.98924	6.62843e-05	0.000370075
COBS08263	819.233	0.545056	0.132941	4.09999	4.13172e-05	0.000245841
COBS06549	874.822	0.544741	0.140886	3.86653	0.000110395	0.000578085
COBS11677	1745.52	0.544066	0.115201	4.72277	2.32659e-06	1.91112e-05
COBS12065	436.312	0.543831	0.0881049	6.17254	6.7202e-10	1.14708e-08
COBS15267	2843.15	0.543433	0.0882581	6.15731	7.39895e-10	1.25181e-08
COBS00740	401.748	0.542849	0.101478	5.34941	8.8241e-08	9.76808e-07
COBS05846	4229.93	0.542418	0.0771701	7.02886	2.08224e-12	5.40903e-11
COBS14563	725.737	0.542082	0.0766127	7.07561	1.48794e-12	3.97037e-11
COBS18974	901.125	0.541869	0.0845453	6.40921	1.46274e-10	2.75814e-09
COBS15654	108.184	0.541783	0.110758	4.8916	1.00018e-06	8.87079e-06
COBS16352	287.398	0.541229	0.106212	5.09574	3.47386e-07	3.41287e-06
COBS15728	1321.2	0.541056	0.102669	5.26991	1.36494e-07	1.45507e-06
COBS16023	863.732	0.54077	0.136115	3.97289	7.10073e-05	0.000392892
COBS11351	324.4	0.540638	0.101791	5.31128	1.08861e-07	1.18087e-06
COBS10014	595.697	0.538958	0.106733	5.04959	4.42764e-07	4.25561e-06
COBS12034	667.727	0.53773	0.100006	5.37697	7.57504e-08	8.49967e-07
COBS07849	731.295	0.537644	0.106692	5.03923	4.67397e-07	4.4626e-06
COBS07885	338.85	0.537374	0.126634	4.24353	2.20036e-05	0.000141647
COBS16271	61.0584	0.537359	0.132773	4.04721	5.18324e-05	0.000299343
COBS01350	46.0477	0.537278	0.131824	4.07574	4.58685e-05	0.000269308
COBS17418	231.277	0.536308	0.115914	4.62676	3.71433e-06	2.89039e-05
COBS17632	344.524	0.535119	0.107206	4.9915	5.99124e-07	5.52799e-06
COBS17869	527.16	0.535117	0.114181	4.68658	2.77811e-06	2.23321e-05
COBS15222	432.689	0.534949	0.0750998	7.12318	1.05468e-12	2.9039e-11
COBS02842	650.184	0.534695	0.0975251	5.48264	4.19022e-08	4.96594e-07
COBS01311	1617.68	0.534652	0.0873437	6.12124	9.28513e-10	1.54374e-08
COBS00225	673.061	0.534495	0.0693857	7.70324	1.32658e-14	4.71005e-13
COBS08498	740.73	0.533592	0.0981536	5.43629	5.44006e-08	6.30879e-07
COBS06653	476.662	0.533194	0.101431	5.2567	1.46666e-07	1.55297e-06
COBS10232	1506.09	0.533192	0.0668277	7.97861	1.4799e-15	6.0494e-14
COBS14120	938.316	0.532952	0.0580516	9.18066	4.28446e-20	3.54462e-18
COBS16745	1666.38	0.532501	0.0630422	8.44673	2.9957e-17	1.61871e-15
COBS13187	63.8591	0.532402	0.138892	3.83322	0.000126478	0.000650486
COBS14530	1629.43	0.532333	0.0545486	9.75887	1.69036e-22	1.97487e-20
COBS00873	224.564	0.531282	0.108036	4.91764	8.75917e-07	7.85241e-06
COBS01115	444.32	0.531269	0.0790373	6.72175	1.79552e-11	3.93988e-10
COBS08593	1964.47	0.530817	0.0782897	6.78016	1.20045e-11	2.73117e-10
COBS18310	1039.98	0.530528	0.0502026	10.5677	4.20471e-26	7.65302e-24
COBS08602	2858.39	0.529881	0.0773744	6.84828	7.47438e-12	1.75597e-10
COBS14505	59.7469	0.529334	0.118452	4.46875	7.86764e-06	5.66831e-05
COBS01336	696.884	0.52865	0.0846957	6.24175	4.32689e-10	7.61876e-09
COBS03739	142.934	0.52607	0.0992799	5.29885	1.16532e-07	1.25699e-06
COBS13922	486.932	0.525558	0.101384	5.18384	2.17363e-07	2.21997e-06
COBS18920	158.487	0.52515	0.12937	4.05929	4.92218e-05	0.000286274
COBS01797	452.827	0.524254	0.0648438	8.08488	6.22259e-16	2.70339e-14
COBS08941	574.144	0.523632	0.0871725	6.00684	1.8917e-09	2.98715e-08
COBS18835	4057.5	0.522998	0.108066	4.83963	1.30082e-06	1.12182e-05
COBS13283	231.288	0.521899	0.0710255	7.34805	2.01123e-13	6.05857e-12
COBS00775	70.8716	0.521116	0.130615	3.98972	6.61509e-05	0.000369569
COBS17402	126.363	0.520986	0.100228	5.19802	2.01421e-07	2.07184e-06
COBS14446	2238.71	0.520969	0.0944095	5.51818	3.42521e-08	4.15616e-07
COBS16728	3474.3	0.520773	0.0700044	7.43914	1.01343e-13	3.18603e-12
COBS11987	1700.43	0.520441	0.0591819	8.79391	1.44443e-18	9.64312e-17
COBS08563	292.505	0.520343	0.0773328	6.72862	1.71283e-11	3.77762e-10
COBS16801	1419.19	0.520248	0.0600892	8.65793	4.80394e-18	2.91456e-16
COBS09186	2220.36	0.519946	0.118733	4.37913	1.19156e-05	8.20523e-05
COBS11197	1129.71	0.519286	0.0786154	6.60539	3.96465e-11	8.25937e-10
COBS09618	272.024	0.518379	0.096674	5.36213	8.22469e-08	9.18689e-07
COBS10367	2623.8	0.517904	0.0851758	6.08041	1.19874e-09	1.95911e-08
COBS07236	50.1291	0.516359	0.138093	3.7392	0.000184606	0.00090863
COBS12227	551.068	0.51621	0.0640427	8.06039	7.60511e-16	3.22304e-14
COBS06413	540.257	0.516165	0.0955812	5.40028	6.65375e-08	7.57905e-07
COBS08617	830.251	0.51563	0.095581	5.3947	6.86387e-08	7.78761e-07
COBS16257	228.908	0.514987	0.0971074	5.30327	1.13745e-07	1.22922e-06
COBS19501	436.845	0.514898	0.103962	4.95277	7.31649e-07	6.66892e-06
COBS06442	1279.53	0.51406	0.0673943	7.62765	2.39069e-14	8.18494e-13
COBS00060	147.935	0.513454	0.0915578	5.60798	2.04702e-08	2.58736e-07
COBS19152	116.547	0.512991	0.137572	3.7289	0.000192317	0.000941492
COBS19735	5213.49	0.512811	0.0582651	8.80133	1.35199e-18	9.13178e-17
COBS05315	2111.36	0.511588	0.0786116	6.5078	7.62617e-11	1.50874e-09
COBS09426	363.82	0.51154	0.0864912	5.91436	3.33172e-09	5.01382e-08
COBS00774	77.2175	0.511042	0.11484	4.45003	8.58597e-06	6.1145e-05
COBS08182	695.116	0.510639	0.0750284	6.80594	1.00391e-11	2.31141e-10
COBS15608	759.447	0.510233	0.069743	7.3159	2.55662e-13	7.60868e-12
COBS03248	931.37	0.510076	0.0669898	7.61423	2.65261e-14	9.01106e-13
COBS01378	2172.67	0.508141	0.0797433	6.37221	1.86329e-10	3.45688e-09
COBS07878	612.297	0.507973	0.0711062	7.14386	9.07434e-13	2.51853e-11
COBS14302	553.395	0.50764	0.132259	3.83822	0.000123931	0.000639287
COBS03172	691.591	0.506637	0.0702702	7.20984	5.60196e-13	1.59577e-11
COBS05295	289.07	0.50653	0.134766	3.75858	0.00017088	0.000851251
COBS08706	721.606	0.506437	0.0629576	8.04409	8.68868e-16	3.66429e-14
COBS08703	245.77	0.505972	0.106734	4.74049	2.13199e-06	1.75887e-05
COBS10133	369.553	0.505944	0.0696953	7.25936	3.88917e-13	1.12454e-11
COBS12187	540.001	0.505923	0.126055	4.0135	5.98248e-05	0.000338602
COBS13892	1680.69	0.505518	0.0752407	6.71868	1.83377e-11	4.00857e-10
COBS13623	1006.4	0.504845	0.0955656	5.28271	1.27288e-07	1.36365e-06
COBS09195	1842.71	0.504561	0.0867555	5.81589	6.0311e-09	8.57597e-08
COBS15872	1703.85	0.504166	0.129883	3.88168	0.000103737	0.000547032
COBS03901	88.9853	0.503861	0.134352	3.75031	0.000176616	0.000875032
COBS13400	775.387	0.503777	0.0566219	8.89721	5.72684e-19	4.10883e-17
COBS07393	107.26	0.503727	0.132297	3.80755	0.000140352	0.000713537
COBS08550	333.246	0.503413	0.075731	6.64738	2.9835e-11	6.31429e-10
COBS19464	41.8689	0.503151	0.125507	4.00895	6.09895e-05	0.000344181
COBS03530	107.207	0.502696	0.128861	3.90107	9.57697e-05	0.000509898
COBS19791	581.639	0.50148	0.13451	3.7282	0.000192851	0.000942774
COBS02405	372.39	0.500284	0.10617	4.71209	2.45186e-06	2.00166e-05
COBS09203	957.783	0.500046	0.088468	5.65227	1.58339e-08	2.04469e-07
COBS15873	181.615	0.499836	0.130334	3.83504	0.000125544	0.000646066
COBS01481	150.037	0.49975	0.0726913	6.87496	6.20073e-12	1.48706e-10
COBS11445	232.677	0.498999	0.119247	4.18459	2.85687e-05	0.00017859
COBS07613	2342.24	0.49836	0.121317	4.10792	3.99247e-05	0.000238627
COBS08609	75.6706	0.498228	0.106391	4.683	2.82712e-06	2.26628e-05
COBS19823	232.195	0.498165	0.123307	4.04005	5.34398e-05	0.000307599
COBS00517	1125.07	0.497694	0.0672829	7.39704	1.39254e-13	4.29972e-12
COBS17257	529.775	0.497322	0.107963	4.60641	4.09674e-06	3.15812e-05
COBS01853	441.722	0.496759	0.0675674	7.35205	1.95187e-13	5.90032e-12
COBS00039	2014.6	0.496346	0.072991	6.8001	1.04548e-11	2.40073e-10
COBS11779	2209.21	0.495153	0.108043	4.58293	4.58504e-06	3.49251e-05
COBS19866	2104.91	0.494911	0.114386	4.32666	1.51384e-05	0.000101536
COBS00561	186.468	0.494767	0.102108	4.84554	1.26267e-06	1.09164e-05
COBS04244	416.38	0.494663	0.0827983	5.97431	2.3107e-09	3.59302e-08
COBS08672	145.289	0.494127	0.119066	4.15003	3.32432e-05	0.000203256
COBS00442	497.615	0.49337	0.119752	4.11993	3.78983e-05	0.000227772
COBS06139	3411.58	0.492251	0.125454	3.92374	8.71845e-05	0.000469336
COBS01734	1105.37	0.492249	0.0958408	5.13612	2.80474e-07	2.79842e-06
COBS14096	81.9009	0.491909	0.112411	4.376	1.20876e-05	8.31704e-05
COBS06655	313.225	0.491764	0.122094	4.02774	5.63165e-05	0.000321482
COBS14692	6123.44	0.491703	0.0888024	5.53705	3.07615e-08	3.78306e-07
COBS16973	288.989	0.491604	0.129959	3.78277	0.000155093	0.000780705
COBS17247	463.012	0.491539	0.119437	4.11547	3.86396e-05	0.000231905
COBS15496	1342.09	0.490566	0.0854856	5.73858	9.54724e-09	1.28169e-07
COBS09394	2863.88	0.490142	0.0849276	5.77129	7.86682e-09	1.08387e-07
COBS04002	461.985	0.490052	0.102767	4.76858	1.8553e-06	1.55426e-05
COBS15232	164.219	0.490042	0.10806	4.53492	5.76252e-06	4.28927e-05
COBS00005	1175.67	0.490025	0.0939369	5.21653	1.82302e-07	1.89434e-06
COBS17408	216.103	0.488972	0.116784	4.18696	2.8271e-05	0.000176857
COBS07719	427.7	0.488643	0.0544366	8.97637	2.79838e-19	2.11296e-17
COBS17370	1497.59	0.487394	0.12365	3.94174	8.08934e-05	0.000439681
COBS05431	549.171	0.487376	0.0994547	4.90048	9.56029e-07	8.52977e-06
COBS13630	2117.44	0.487245	0.0703288	6.9281	4.26541e-12	1.0612e-10
COBS02411	185.195	0.487237	0.111559	4.36753	1.2566e-05	8.58887e-05
COBS17494	128.986	0.486984	0.117531	4.14344	3.42135e-05	0.000208746
COBS02614	2311.39	0.486689	0.0963858	5.04938	4.4324e-07	4.25782e-06
COBS00889	218.214	0.486336	0.108519	4.48156	7.40984e-06	5.37565e-05
COBS08315	1312.1	0.485791	0.0461991	10.5151	7.35682e-26	1.27207e-23
COBS03519	567.8	0.485512	0.0722054	6.72404	1.7675e-11	3.88334e-10
COBS06503	118.895	0.485507	0.122116	3.97579	7.01455e-05	0.000388995
COBS16431	116.875	0.485429	0.105358	4.60743	4.07683e-06	3.14418e-05
COBS14024	104.935	0.484689	0.119126	4.06872	4.72721e-05	0.000276236
COBS11893	857.437	0.484442	0.118105	4.10179	4.09964e-05	0.000244101
COBS03484	122.534	0.484245	0.115967	4.17571	2.9706e-05	0.000185098
COBS09530	110.777	0.483988	0.101942	4.74769	2.05749e-06	1.70465e-05
COBS13513	543.901	0.48372	0.101566	4.76261	1.91104e-06	1.59401e-05
COBS16463	258.012	0.483717	0.111076	4.35484	1.33161e-05	9.04357e-05
COBS19297	403.285	0.483051	0.0609423	7.92638	2.25629e-15	8.94361e-14
COBS07316	81.4269	0.482341	0.127656	3.77845	0.000157804	0.000792284
COBS12620	129.895	0.482002	0.128142	3.76148	0.000168908	0.000842642
COBS09420	416.825	0.481996	0.108951	4.42398	9.69011e-06	6.81936e-05
COBS07614	1101.16	0.481933	0.087225	5.52517	3.29159e-08	4.00527e-07
COBS07456	865.304	0.481853	0.0957648	5.03163	4.86323e-07	4.61632e-06
COBS00042	230.891	0.481278	0.100009	4.81235	1.49163e-06	1.26866e-05
COBS09533	192.619	0.480147	0.1196	4.01462	5.95421e-05	0.000337113
COBS19275	203.343	0.479108	0.127495	3.75787	0.000171368	0.000853432
COBS14511	93.0886	0.478989	0.108941	4.39676	1.09879e-05	7.62715e-05
COBS03658	552.092	0.478802	0.0928865	5.15471	2.5403e-07	2.56268e-06
COBS02486	531.749	0.477396	0.104033	4.58888	4.45623e-06	3.40339e-05
COBS09957	643.814	0.477143	0.120455	3.96117	7.45849e-05	0.000409535
COBS07560	177	0.476657	0.119231	3.99777	6.39417e-05	0.000359218
COBS02322	6002.14	0.476621	0.0636952	7.48284	7.27346e-14	2.33765e-12
COBS13268	115.163	0.476493	0.122629	3.88564	0.000102059	0.000540202
COBS02069	82.8608	0.476387	0.116367	4.09384	4.24291e-05	0.00025151
COBS04676	882.664	0.475792	0.0753314	6.31599	2.68444e-10	4.86548e-09
COBS12116	4622.05	0.47548	0.0638733	7.44411	9.76026e-14	3.08528e-12
COBS19329	296.737	0.474306	0.126743	3.74226	0.000182376	0.000899449
COBS11347	269.023	0.473613	0.10112	4.6837	2.81749e-06	2.25961e-05
COBS16842	733.825	0.473514	0.0795357	5.95348	2.62496e-09	4.02734e-08
COBS01943	368.738	0.473114	0.0682048	6.93667	4.01452e-12	1.00601e-10
COBS06355	180.7	0.472836	0.0978288	4.8333	1.34291e-06	1.15237e-05
COBS10521	680.106	0.472095	0.121353	3.89026	0.000100136	0.000531121
COBS12059	639.894	0.471883	0.0873274	5.40361	6.53139e-08	7.45678e-07
COBS11683	832.59	0.470584	0.084493	5.5695	2.55473e-08	3.18026e-07
COBS01384	336.587	0.470172	0.07885	5.96286	2.47857e-09	3.82994e-08
COBS18351	355.591	0.469145	0.105234	4.45813	8.26767e-06	5.91707e-05
COBS06726	4942.4	0.468104	0.0656519	7.13009	1.00305e-12	2.76615e-11
COBS19209	72.4742	0.466327	0.110147	4.23367	2.29904e-05	0.000147232
COBS09997	370.607	0.46562	0.0708942	6.56782	5.10581e-11	1.03378e-09
COBS19393	238.63	0.46502	0.0957153	4.85836	1.18361e-06	1.0305e-05
COBS04206	804.002	0.465002	0.0859715	5.40879	6.34519e-08	7.27551e-07
COBS08680	2707.23	0.464406	0.0562921	8.24994	1.58468e-16	7.42567e-15
COBS05690	435.758	0.46403	0.0582357	7.96814	1.61084e-15	6.55364e-14
COBS19543	322.089	0.463036	0.0757029	6.11649	9.56567e-10	1.58886e-08
COBS06553	313.619	0.463008	0.0696566	6.64701	2.99107e-11	6.32257e-10
COBS07606	575.753	0.462452	0.0692811	6.67501	2.47214e-11	5.29687e-10
COBS11234	6688.09	0.46114	0.0500564	9.21241	3.18869e-20	2.68954e-18
COBS04119	577.928	0.461021	0.060725	7.59195	3.15136e-14	1.05397e-12
COBS02992	734.074	0.459757	0.112467	4.08793	4.35244e-05	0.000257204
COBS19483	156.28	0.459269	0.108287	4.24123	2.22297e-05	0.000142943
COBS05895	861.691	0.458838	0.0982783	4.66876	3.03021e-06	2.4066e-05
COBS07504	2610.02	0.458635	0.0701055	6.54207	6.06738e-11	1.21848e-09
COBS01942	496.306	0.458126	0.102569	4.46653	7.95003e-06	5.7229e-05
COBS16916	387.459	0.457216	0.11323	4.03793	5.39244e-05	0.000309564
COBS10022	1423.74	0.457024	0.100517	4.54674	5.44829e-06	4.08705e-05
COBS01703	491.263	0.455799	0.0701211	6.50017	8.02279e-11	1.57818e-09
COBS02868	473.063	0.45556	0.0588918	7.73553	1.02973e-14	3.71714e-13
COBS03173	1600.91	0.455078	0.0588208	7.73668	1.02045e-14	3.69132e-13
COBS12642	1162.33	0.455051	0.101576	4.47989	7.46799e-06	5.41195e-05
COBS10476	384.218	0.454958	0.0796212	5.71403	1.10332e-08	1.46751e-07
COBS06428	181.288	0.45477	0.122003	3.72752	0.00019337	0.000944414
COBS12436	293.804	0.454369	0.0952001	4.77278	1.81699e-06	1.52661e-05
COBS15242	583.538	0.454013	0.0648758	6.9982	2.59278e-12	6.63192e-11
COBS07116	161.293	0.453639	0.112782	4.02226	5.76431e-05	0.000327757
COBS18188	293.967	0.453042	0.11752	3.85502	0.000115721	0.000602327
COBS02888	52.4316	0.452231	0.117871	3.83667	0.000124714	0.000641985
COBS10806	729.675	0.45134	0.0874144	5.16322	2.42741e-07	2.45596e-06
COBS04630	1443.72	0.451312	0.0550336	8.20066	2.39068e-16	1.09648e-14
COBS08929	352.186	0.451232	0.0769135	5.86675	4.44423e-09	6.54558e-08
COBS13488	386.537	0.451162	0.0735952	6.13032	8.77051e-10	1.46381e-08
COBS03991	492.598	0.451032	0.11427	3.94709	7.91065e-05	0.000431356
COBS08469	319.189	0.45061	0.08047	5.59972	2.14693e-08	2.70196e-07
COBS08605	211.337	0.450483	0.0892826	5.04559	4.5212e-07	4.33349e-06
COBS17224	797.471	0.450393	0.0750003	6.00521	1.91079e-09	3.0118e-08
COBS07751	1908.44	0.450138	0.0637497	7.06102	1.65282e-12	4.37656e-11
COBS00458	2067.96	0.449861	0.0792678	5.67521	1.38519e-08	1.81863e-07
COBS16347	709.24	0.449642	0.0702399	6.40153	1.53831e-10	2.89119e-09
COBS18833	1147.49	0.448515	0.0882634	5.08155	3.74362e-07	3.65712e-06
COBS04835	4217.15	0.448089	0.096354	4.65044	3.3123e-06	2.60687e-05
COBS17077	180.49	0.447756	0.0891181	5.0243	5.05283e-07	4.77162e-06
COBS12490	83.921	0.447623	0.111399	4.01818	5.86493e-05	0.000332711
COBS12104	2497.52	0.446805	0.0582412	7.67163	1.69818e-14	5.93197e-13
COBS06512	623.534	0.446209	0.0868645	5.13684	2.79402e-07	2.78934e-06
COBS02070	368.008	0.446114	0.111347	4.00652	6.16186e-05	0.000347164
COBS05582	463.252	0.445797	0.105228	4.2365	2.27036e-05	0.000145611
COBS17390	296.791	0.445316	0.0731591	6.08695	1.15081e-09	1.88435e-08
COBS02852	2859.29	0.444797	0.0467211	9.52027	1.72732e-21	1.7067e-19
COBS03187	1852.67	0.44447	0.0432923	10.2667	9.95276e-25	1.48356e-22
COBS16972	4277.96	0.444031	0.043853	10.1254	4.26057e-24	5.94109e-22
COBS12863	936.129	0.443653	0.0726659	6.10538	1.02554e-09	1.69367e-08
COBS05580	252.877	0.443086	0.0875561	5.06059	4.17954e-07	4.04412e-06
COBS05731	640.135	0.442716	0.0828431	5.34404	9.08997e-08	1.00303e-06
COBS07531	2519.66	0.442229	0.078374	5.64255	1.6755e-08	2.14918e-07
COBS10513	734.926	0.441491	0.0548501	8.04904	8.34448e-16	3.52774e-14
COBS02973	500.393	0.441343	0.111976	3.94141	8.10052e-05	0.000439992
COBS04595	202.777	0.44083	0.105959	4.1604	3.17694e-05	0.000195142
COBS02928	242.519	0.440382	0.086504	5.09089	3.56396e-07	3.49147e-06
COBS13797	5474.25	0.439366	0.046616	9.42523	4.29175e-21	4.03308e-19
COBS12587	387.227	0.439364	0.0747446	5.87821	4.1473e-09	6.15017e-08
COBS02957	263.948	0.439196	0.0878281	5.00063	5.7143e-07	5.30644e-06
COBS03252	112.422	0.43916	0.109083	4.02593	5.67511e-05	0.000323003
COBS03726	2112.23	0.438933	0.0722947	6.07143	1.26773e-09	2.06407e-08
COBS10101	534.882	0.438622	0.116875	3.75292	0.00017479	0.000867229
COBS16039	920.118	0.438234	0.0461908	9.48747	2.36717e-21	2.31247e-19
COBS06294	706.673	0.438205	0.0707915	6.19008	6.01351e-10	1.03257e-08
COBS05367	1472.18	0.437752	0.0636973	6.87238	6.31378e-12	1.50998e-10
COBS14031	751.038	0.437409	0.108851	4.01843	5.8586e-05	0.000332462
COBS08274	101.748	0.437383	0.108444	4.03327	5.50062e-05	0.000314625
COBS09981	674.739	0.437379	0.0849253	5.15016	2.60259e-07	2.61789e-06
COBS02920	462.499	0.437233	0.0801109	5.45784	4.8196e-08	5.65371e-07
COBS15985	1075.08	0.436985	0.0848225	5.15176	2.58056e-07	2.59875e-06
COBS10486	1671.93	0.436146	0.0719922	6.05824	1.37616e-09	2.23429e-08
COBS03779	127.688	0.435881	0.113193	3.85077	0.000117745	0.000611574
COBS02960	1837.91	0.435545	0.0942986	4.61879	3.85985e-06	2.98884e-05
COBS10332	274.948	0.43552	0.091923	4.73788	2.15967e-06	1.77993e-05
COBS14030	508.209	0.435228	0.0549567	7.91946	2.38542e-15	9.3955e-14
COBS12285	632.021	0.435219	0.0686915	6.33585	2.36033e-10	4.32336e-09
COBS05004	1892.25	0.434335	0.057223	7.59021	3.19384e-14	1.06611e-12
COBS10097	868.333	0.434156	0.0935205	4.64236	3.44455e-06	2.69623e-05
COBS11968	2550.99	0.433887	0.0974087	4.45429	8.41705e-06	6.00905e-05
COBS05306	485.672	0.433166	0.0950469	4.55739	5.17929e-06	3.90048e-05
COBS17775	3302.24	0.432713	0.0427426	10.1237	4.33689e-24	5.99913e-22
COBS17448	634.725	0.432249	0.105435	4.09968	4.13727e-05	0.000246087
COBS02749	635.25	0.431922	0.0626353	6.89583	5.35497e-12	1.30363e-10
COBS02714	2733.78	0.431135	0.0772658	5.5799	2.40658e-08	3.01101e-07
COBS13615	75.8538	0.430511	0.108644	3.96259	7.414e-05	0.000407487
COBS15376	1108.85	0.430026	0.0776906	5.53511	3.11034e-08	3.81966e-07
COBS06392	416.65	0.428727	0.0939073	4.56542	4.98493e-06	3.7623e-05
COBS09554	155.468	0.428619	0.101922	4.20538	2.60647e-05	0.000164411
COBS02246	474.475	0.428494	0.0956137	4.48151	7.41169e-06	5.37565e-05
COBS17598	205.861	0.428146	0.106737	4.01121	6.04092e-05	0.000341351
COBS19503	360.428	0.427818	0.0874675	4.89116	1.00244e-06	8.88422e-06
COBS12309	805.455	0.427705	0.0497548	8.59627	8.23518e-18	4.84335e-16
COBS15691	106.356	0.427665	0.0839206	5.09607	3.4677e-07	3.40875e-06
COBS00865	305.763	0.426266	0.0965852	4.41337	1.01776e-05	7.1305e-05
COBS02865	721.911	0.42617	0.0868435	4.90733	9.23244e-07	8.25857e-06
COBS03523	3727.99	0.426142	0.0440721	9.6692	4.0755e-22	4.63615e-20
COBS14177	462.483	0.426131	0.0644822	6.60851	3.88206e-11	8.11664e-10
COBS03674	3993.84	0.426106	0.102119	4.17263	3.01101e-05	0.000187413
COBS00862	331.94	0.425759	0.0708016	6.0134	1.81668e-09	2.87658e-08
COBS13798	205.49	0.425614	0.0652981	6.51802	7.12438e-11	1.42085e-09
COBS10058	372.222	0.425518	0.113028	3.76472	0.000166736	0.000833487
COBS04213	564.01	0.424937	0.0580351	7.32206	2.44194e-13	7.2925e-12
COBS18093	439.402	0.424758	0.0639967	6.63719	3.19715e-11	6.72528e-10
COBS16475	712.977	0.424054	0.110177	3.84886	0.000118671	0.00061595
COBS18348	682.027	0.423882	0.0800492	5.29526	1.18844e-07	1.27715e-06
COBS04761	264.522	0.42373	0.0998454	4.24386	2.19703e-05	0.000141486
COBS05641	1008.59	0.423661	0.104513	4.05368	5.04189e-05	0.000292352
COBS14642	5825.48	0.423244	0.0560894	7.54589	4.49201e-14	1.46827e-12
COBS16838	1113.21	0.42272	0.057952	7.29431	3.0019e-13	8.87279e-12
COBS03979	1110.75	0.422304	0.0710939	5.94009	2.84862e-09	4.32826e-08
COBS07048	117.952	0.422206	0.112817	3.74239	0.000182279	0.000899225
COBS07519	352.753	0.421806	0.113004	3.73266	0.000189471	0.000929404
COBS15780	1389.24	0.421634	0.0568946	7.41078	1.25556e-13	3.91169e-12
COBS02238	3824.89	0.421582	0.0824097	5.11568	3.12608e-07	3.09991e-06
COBS05775	1088.47	0.421579	0.0676447	6.23225	4.59793e-10	8.06316e-09
COBS09999	233.611	0.421036	0.0873966	4.81754	1.45342e-06	1.23676e-05
COBS16330	257.51	0.421011	0.10468	4.02189	5.77336e-05	0.000328163
COBS03102	931.653	0.42096	0.0708937	5.9379	2.88692e-09	4.37874e-08
COBS00234	1305.05	0.420747	0.0722347	5.82472	5.72091e-09	8.19555e-08
COBS19788	2689.33	0.420225	0.0475562	8.83639	9.88572e-19	6.81012e-17
COBS09321	1192.7	0.420141	0.0671093	6.26056	3.83601e-10	6.81691e-09
COBS12349	1361.61	0.419908	0.0772173	5.43801	5.38789e-08	6.26088e-07
COBS04843	705.304	0.418348	0.0751714	5.56526	2.61764e-08	3.25389e-07
COBS12225	86.8244	0.418319	0.0945346	4.42504	9.64264e-06	6.78872e-05
COBS12345	273.513	0.41831	0.0998483	4.18946	2.79622e-05	0.000175179
COBS15616	967.59	0.41796	0.109643	3.81199	0.000137852	0.00070271
COBS12069	3178.7	0.417848	0.0789044	5.29562	1.18613e-07	1.27546e-06
COBS12613	12814.9	0.416654	0.0960697	4.337	1.44442e-05	9.73326e-05
COBS04247	247.858	0.416219	0.072654	5.72878	1.01153e-08	1.3527e-07
COBS00188	641.648	0.415937	0.0495197	8.39943	4.4865e-17	2.3157e-15
COBS08756	102.943	0.415751	0.108795	3.82141	0.000132691	0.000678805
COBS08334	1805.43	0.415709	0.0539734	7.70212	1.3383e-14	4.73222e-13
COBS02320	276.56	0.415102	0.0733072	5.6625	1.49186e-08	1.94165e-07
COBS18100	220.578	0.414251	0.0838075	4.94288	7.69752e-07	6.99043e-06
COBS16672	88.8431	0.414209	0.102827	4.02823	5.61982e-05	0.000320913
COBS07446	260.444	0.413982	0.0928365	4.45926	8.2244e-06	5.89586e-05
COBS00822	1684.48	0.412852	0.0590335	6.99353	2.68062e-12	6.83637e-11
COBS13887	943.621	0.412268	0.0718848	5.73511	9.74465e-09	1.30717e-07
COBS17420	939.236	0.412187	0.0727576	5.66521	1.46843e-08	1.91615e-07
COBS07224	4859.93	0.412166	0.0960531	4.29103	1.77849e-05	0.000117508
COBS08209	767.416	0.411572	0.0689366	5.9703	2.3682e-09	3.67252e-08
COBS09314	6620.03	0.411069	0.04926	8.34488	7.12876e-17	3.60419e-15
COBS12455	168.538	0.410642	0.0915804	4.48395	7.32726e-06	5.32023e-05
COBS07662	2715.61	0.410458	0.071526	5.73859	9.54701e-09	1.28169e-07
COBS00721	2683.66	0.409948	0.0842763	4.86433	1.14846e-06	1.00598e-05
COBS07805	427.721	0.409256	0.0708479	5.77655	7.62474e-09	1.05556e-07
COBS01479	182.562	0.40902	0.106401	3.84415	0.000120972	0.000626268
COBS04467	447.929	0.408718	0.0890347	4.59054	4.42091e-06	3.38238e-05
COBS18800	246.156	0.40828	0.0873399	4.67461	2.94509e-06	2.34996e-05
COBS10640	1099.31	0.408266	0.0827782	4.93204	8.13735e-07	7.34741e-06
COBS01735	300.76	0.40799	0.0839894	4.85764	1.18792e-06	1.03374e-05
COBS05732	136.662	0.407104	0.0988332	4.1191	3.80351e-05	0.000228435
COBS00316	3601.01	0.406917	0.0435425	9.34528	9.16431e-21	8.29634e-19
COBS06695	411.955	0.406804	0.0911355	4.46373	8.05465e-06	5.78376e-05
COBS11327	416.573	0.406791	0.0804768	5.05476	4.30933e-07	4.15575e-06
COBS05574	804.304	0.406661	0.0569135	7.14525	8.98305e-13	2.4972e-11
COBS14225	351.501	0.404642	0.104916	3.85682	0.000114873	0.000598635
COBS04289	780.406	0.404582	0.0967285	4.18265	2.88128e-05	0.000179986
COBS18370	288.841	0.404515	0.0875739	4.61913	3.85358e-06	2.98532e-05
COBS04961	193.397	0.404038	0.106709	3.78636	0.000152873	0.000771325
COBS04894	181.681	0.402845	0.0920338	4.37714	1.20246e-05	8.27694e-05
COBS18949	1006.82	0.402722	0.0862472	4.66939	3.02094e-06	2.40051e-05
COBS09909	475.969	0.402655	0.065357	6.16086	7.23508e-10	1.22769e-08
COBS07745	2567.38	0.40198	0.0693476	5.7966	6.76747e-09	9.50967e-08
COBS04957	399.852	0.401597	0.0652302	6.15662	7.43138e-10	1.25607e-08
COBS08944	3435.85	0.401517	0.0568137	7.06726	1.58023e-12	4.19077e-11
COBS15363	849.216	0.400844	0.0795073	5.0416	4.61665e-07	4.41518e-06
COBS10884	296.537	0.400673	0.0911358	4.39644	1.10039e-05	7.63518e-05
COBS14661	577.004	0.400227	0.0999554	4.00406	6.22645e-05	0.000350575
COBS04707	872.742	0.399781	0.0948865	4.21325	2.51719e-05	0.000159607
COBS08539	3191.44	0.399326	0.0601263	6.64145	3.10607e-11	6.54167e-10
COBS19045	557.49	0.398577	0.0735951	5.4158	6.10137e-08	7.00058e-07
COBS04005	814.03	0.39784	0.0729098	5.45661	4.85317e-08	5.68923e-07
COBS18534	3375.42	0.397545	0.0647578	6.13896	8.30644e-10	1.39579e-08
COBS18354	120.025	0.397453	0.095694	4.15337	3.27613e-05	0.000200763
COBS17492	707.604	0.397296	0.0936498	4.24236	2.21178e-05	0.000142276
COBS07598	77.6821	0.397275	0.106996	3.71299	0.000204826	0.000994005
COBS07458	5815.11	0.396986	0.0579417	6.85146	7.30994e-12	1.72202e-10
COBS15156	1195.84	0.396939	0.0529473	7.49687	6.53597e-14	2.11636e-12
COBS00928	672.726	0.39687	0.0921748	4.30562	1.66516e-05	0.000110824
COBS11482	546.816	0.395558	0.0949275	4.16695	3.087e-05	0.000190906
COBS01963	4103.53	0.39535	0.0615346	6.42483	1.32018e-10	2.51401e-09
COBS14771	1289.82	0.394876	0.0655784	6.02143	1.72884e-09	2.74e-08
COBS02848	102.314	0.394219	0.0991806	3.97476	7.04503e-05	0.000390435
COBS18845	630.072	0.393897	0.0748577	5.26194	1.4254e-07	1.51299e-06
COBS10055	699.875	0.393231	0.0928366	4.23574	2.27801e-05	0.000146048
COBS00239	985.687	0.393112	0.0720769	5.45406	4.92318e-08	5.76348e-07
COBS07301	3890.01	0.39298	0.0734422	5.35088	8.75267e-08	9.69522e-07
COBS02152	279.858	0.39277	0.0917105	4.28272	1.84624e-05	0.000121385
COBS02943	1234.66	0.391866	0.0980788	3.99543	6.45779e-05	0.000362067
COBS08926	251.971	0.391284	0.0789203	4.95796	7.12374e-07	6.51383e-06
COBS14696	485.235	0.391231	0.0993856	3.93649	8.26816e-05	0.000447324
COBS16005	170.175	0.391207	0.0951974	4.10943	3.96636e-05	0.000237312
COBS06723	759.769	0.390588	0.0711664	5.48838	4.05634e-08	4.83378e-07
COBS18628	1288.69	0.390327	0.0629944	6.19622	5.78355e-10	9.99034e-09
COBS09572	3682.5	0.389799	0.09899	3.93777	8.22439e-05	0.000445235
COBS11551	244.536	0.38962	0.082821	4.70436	2.54663e-06	2.06731e-05
COBS05165	782.082	0.389519	0.0960985	4.05333	5.04939e-05	0.000292689
COBS13102	12311.8	0.389176	0.0473957	8.21122	2.18955e-16	1.01229e-14
COBS15983	960.073	0.388551	0.0957783	4.05678	4.97549e-05	0.000288889
COBS03683	1145.93	0.386828	0.0958487	4.03581	5.44135e-05	0.000311854
COBS05322	763.486	0.386761	0.0612205	6.3175	2.65829e-10	4.8282e-09
COBS16748	633.138	0.386672	0.067131	5.75995	8.41386e-09	1.14735e-07
COBS03191	1234.45	0.385639	0.0481328	8.01198	1.12876e-15	4.71433e-14
COBS19002	58350.9	0.385426	0.0908485	4.24252	2.21028e-05	0.000142233
COBS01903	1298.04	0.385109	0.0871655	4.41814	9.95535e-06	6.99464e-05
COBS13840	2169.31	0.384384	0.0437695	8.782	1.60594e-18	1.04786e-16
COBS02074	844.35	0.383849	0.0654347	5.86614	4.4606e-09	6.55852e-08
COBS11115	883.811	0.383694	0.092055	4.16809	3.07157e-05	0.000190227
COBS10916	3676.73	0.38116	0.0579259	6.58012	4.70057e-11	9.58462e-10
COBS17198	662.592	0.381086	0.0607788	6.27005	3.60923e-10	6.44703e-09
COBS05679	1068.42	0.381005	0.044803	8.50399	1.83177e-17	1.02502e-15
COBS00345	463.962	0.38094	0.0785991	4.84662	1.25581e-06	1.0868e-05
COBS12120	255.109	0.380887	0.0803478	4.74048	2.13209e-06	1.75887e-05
COBS08704	465.308	0.380622	0.0914116	4.16382	3.12964e-05	0.000193059
COBS10188	1417.65	0.379117	0.0642467	5.90096	3.61392e-09	5.41963e-08
COBS13410	2298.51	0.378953	0.0830861	4.56097	5.09176e-06	3.83791e-05
COBS01863	1197.47	0.378865	0.0895657	4.23002	2.33666e-05	0.000149309
COBS11481	481.184	0.377946	0.0795895	4.74868	2.04744e-06	1.69795e-05
COBS19035	7388.94	0.377735	0.0480111	7.86767	3.6131e-15	1.38831e-13
COBS05417	2242.88	0.377513	0.072779	5.18712	2.13576e-07	2.18388e-06
COBS04799	335.234	0.376934	0.0991294	3.80245	0.000143274	0.000727564
COBS08551	602.784	0.376875	0.076388	4.9337	8.06876e-07	7.2931e-06
COBS03871	575.056	0.376583	0.0970763	3.87924	0.000104782	0.000551531
COBS13255	1116.92	0.37654	0.0665735	5.656	1.54944e-08	2.00492e-07
COBS12963	199.038	0.375686	0.0939687	3.99799	6.38821e-05	0.000359098
COBS19459	1371.42	0.375654	0.0748666	5.01765	5.23077e-07	4.92057e-06
COBS08625	7568.43	0.374799	0.074781	5.01196	5.38782e-07	5.0439e-06
COBS07781	1468.07	0.374318	0.072087	5.19258	2.07401e-07	2.12451e-06
COBS05518	1777.39	0.374179	0.0970491	3.85557	0.000115463	0.000601163
COBS10810	2588.27	0.374097	0.0528831	7.07403	1.50498e-12	4.00965e-11
COBS06496	510.026	0.374057	0.0823234	4.54374	5.52636e-06	4.14381e-05
COBS06914	813.331	0.373954	0.0603651	6.19488	5.83295e-10	1.00556e-08
COBS00770	417.447	0.373873	0.0652785	5.72735	1.02012e-08	1.36313e-07
COBS07593	1119.22	0.37383	0.0622425	6.00603	1.90124e-09	2.99949e-08
COBS10927	543.533	0.373544	0.083089	4.49571	6.93394e-06	5.06783e-05
COBS02126	1401.34	0.372288	0.0852722	4.36588	1.26613e-05	8.63953e-05
COBS11132	779.827	0.371819	0.093478	3.97761	6.96124e-05	0.00038641
COBS11761	726.194	0.370781	0.0597537	6.20516	5.46414e-10	9.46698e-09
COBS06393	1944.06	0.369604	0.0897181	4.11962	3.79505e-05	0.000228006
COBS06643	557.12	0.36847	0.0908269	4.05684	4.97406e-05	0.000288889
COBS10179	538.154	0.368178	0.0767897	4.79463	1.62974e-06	1.37732e-05
COBS19723	600.325	0.367189	0.0656886	5.58984	2.27273e-08	2.84974e-07
COBS07161	218.085	0.366164	0.0848232	4.31679	1.58316e-05	0.000105856
COBS17987	363.98	0.365543	0.0969597	3.77005	0.000163214	0.000816828
COBS17114	577.215	0.365512	0.0636872	5.73918	9.51365e-09	1.27916e-07
COBS01107	425.678	0.365319	0.0774829	4.71483	2.41911e-06	1.97866e-05
COBS03656	169.521	0.365304	0.096271	3.79454	0.00014792	0.000748703
COBS16040	411.812	0.365117	0.0709194	5.14834	2.62803e-07	2.6404e-06
COBS07103	352.994	0.364623	0.0866106	4.20991	2.55467e-05	0.000161509
COBS09916	13645.3	0.36422	0.03959	9.1998	3.58601e-20	3.00999e-18
COBS13175	213.673	0.363927	0.0834884	4.35901	1.30651e-05	8.88703e-05
COBS16217	2400.2	0.363608	0.0480723	7.56378	3.91533e-14	1.28707e-12
COBS14984	427.001	0.363436	0.0852932	4.26102	2.03499e-05	0.000132681
COBS15545	482.702	0.363238	0.0890831	4.07752	4.55194e-05	0.000267472
COBS14381	594.658	0.362117	0.080213	4.51444	6.34837e-06	4.68101e-05
COBS15767	2292.63	0.361913	0.0627389	5.76856	7.99532e-09	1.09725e-07
COBS01540	627.252	0.361841	0.0909691	3.97762	6.96075e-05	0.00038641
COBS06009	2265.9	0.361408	0.0619585	5.83307	5.44175e-09	7.84765e-08
COBS07832	748.974	0.361222	0.0855565	4.22203	2.42117e-05	0.000154029
COBS06318	756.304	0.360804	0.0723473	4.9871	6.1291e-07	5.64014e-06
COBS02970	4720.8	0.360438	0.0654705	5.50536	3.68424e-08	4.42084e-07
COBS09577	140.111	0.360079	0.0869387	4.14175	3.44661e-05	0.000210024
COBS06126	440.327	0.360064	0.0773543	4.65474	3.24395e-06	2.56007e-05
COBS14610	475.269	0.359792	0.0918109	3.91883	8.89789e-05	0.000477806
COBS18509	6925.35	0.359778	0.0670913	5.36252	8.207e-08	9.17306e-07
COBS00544	3195.57	0.359625	0.0713287	5.0418	4.61172e-07	4.41291e-06
COBS16032	486.152	0.359535	0.0910033	3.95079	7.78952e-05	0.000425422
COBS03070	2126.28	0.358879	0.0716468	5.00901	5.47109e-07	5.11078e-06
COBS09988	1113.72	0.358418	0.0554527	6.46349	1.02317e-10	1.98114e-09
COBS13613	882.428	0.358229	0.0487449	7.34906	1.99601e-13	6.02323e-12
COBS19837	837.782	0.357855	0.0793921	4.50743	6.56166e-06	4.82798e-05
COBS12524	1137.53	0.357839	0.0683053	5.23881	1.61616e-07	1.69466e-06
COBS02242	449.486	0.357744	0.0762796	4.68991	2.73328e-06	2.19921e-05
COBS01299	129.817	0.357496	0.0961596	3.71773	0.000201018	0.000977172
COBS13720	547.263	0.35741	0.0749815	4.76665	1.87316e-06	1.56694e-05
COBS17171	1446.66	0.356663	0.0737887	4.83357	1.34105e-06	1.1518e-05
COBS18767	626.343	0.35576	0.0665853	5.34293	9.14582e-08	1.00716e-06
COBS13160	631.033	0.355378	0.0854705	4.15791	3.21177e-05	0.000197071
COBS10592	253.273	0.355058	0.0898143	3.95324	7.70994e-05	0.000421742
COBS10814	1310.21	0.354508	0.0933565	3.79735	0.00014625	0.00074137
COBS19110	615.317	0.354421	0.0726722	4.87698	1.07722e-06	9.46932e-06
COBS05778	275.802	0.354166	0.082625	4.28642	1.81576e-05	0.000119651
COBS15766	1456.96	0.353224	0.0665183	5.31017	1.09524e-07	1.18583e-06
COBS07057	13061.9	0.352934	0.0447541	7.88608	3.11838e-15	1.21441e-13
COBS01054	1884.55	0.352253	0.0891432	3.95154	7.7649e-05	0.000424346
COBS02348	388.08	0.351412	0.0859363	4.08921	4.32844e-05	0.000256022
COBS03057	4803.29	0.34981	0.0521999	6.70135	2.06496e-11	4.47435e-10
COBS17700	468.561	0.349776	0.0700318	4.99453	5.89778e-07	5.45631e-06
COBS10205	821.7	0.349495	0.0865773	4.0368	5.41862e-05	0.000310654
COBS03724	1582.12	0.349367	0.0493156	7.08431	1.39738e-12	3.7577e-11
COBS08924	921.807	0.349232	0.0748737	4.66428	3.09697e-06	2.45191e-05
COBS10074	949.357	0.349096	0.0569236	6.13272	8.63904e-10	1.44326e-08
COBS15604	376.728	0.348996	0.0746001	4.67823	2.89362e-06	2.31423e-05
COBS11107	368.589	0.348993	0.0769963	4.53259	5.82649e-06	4.33316e-05
COBS02376	4795.5	0.348242	0.0892598	3.90144	9.56225e-05	0.000509525
COBS07833	5455.5	0.34809	0.0700468	4.96939	6.71627e-07	6.15753e-06
COBS05560	824.746	0.347377	0.0591558	5.87223	4.29965e-09	6.3543e-08
COBS11081	607.685	0.347269	0.0691674	5.02071	5.14819e-07	4.85108e-06
COBS03932	2400.91	0.346395	0.0692926	4.99902	5.76232e-07	5.34243e-06
COBS18673	2602.16	0.34633	0.0561145	6.17184	6.74989e-10	1.15101e-08
COBS13242	400.234	0.346282	0.0842327	4.11101	3.93929e-05	0.000236098
COBS00199	723.634	0.346275	0.0773975	4.47399	7.67749e-06	5.54054e-05
COBS19583	3107.29	0.346173	0.0626948	5.52155	3.36015e-08	4.08008e-07
COBS07556	329.795	0.345447	0.0790748	4.36861	1.25039e-05	8.56256e-05
COBS01855	1335.73	0.3444	0.0488905	7.0443	1.86393e-12	4.89492e-11
COBS00753	1319.41	0.344188	0.0583376	5.89993	3.63645e-09	5.43809e-08
COBS15920	1850.64	0.344173	0.0869028	3.96044	7.48125e-05	0.0004104
COBS12306	1183.7	0.344025	0.0618669	5.56074	2.68639e-08	3.3344e-07
COBS11566	2934.04	0.343343	0.063396	5.41585	6.09992e-08	7.00058e-07
COBS16357	932.572	0.343331	0.0577432	5.94582	2.75069e-09	4.20531e-08
COBS13976	594.412	0.342514	0.0891876	3.84038	0.000122846	0.000635017
COBS19533	299.006	0.342475	0.0740275	4.62632	3.72215e-06	2.89387e-05
COBS19274	910.8	0.342059	0.0624655	5.47597	4.35117e-08	5.14611e-07
COBS13604	1978.84	0.341641	0.0455262	7.50427	6.17722e-14	2.00395e-12
COBS00900	2937.4	0.34133	0.0870413	3.92148	8.8008e-05	0.000473033
COBS16814	579.151	0.341241	0.0735457	4.63985	3.4866e-06	2.72668e-05
COBS07616	442.252	0.34044	0.0697991	4.87743	1.07477e-06	9.45744e-06
COBS00070	1925.55	0.339952	0.058127	5.84844	4.96206e-09	7.24042e-08
COBS15045	512.739	0.339466	0.0734496	4.62175	3.80509e-06	2.95172e-05
COBS12573	2691.03	0.339226	0.0535052	6.34007	2.29666e-10	4.21119e-09
COBS17414	833.087	0.33915	0.0628324	5.39769	6.75041e-08	7.67903e-07
COBS02939	618.992	0.339032	0.0618038	5.48562	4.12014e-08	4.89631e-07
COBS10270	455.335	0.338967	0.0887402	3.81976	0.000133579	0.000682542
COBS02717	810.759	0.338925	0.0403146	8.40701	4.20613e-17	2.18403e-15
COBS11947	677.189	0.338913	0.0853553	3.97062	7.16857e-05	0.000396265
COBS01396	4270.68	0.338568	0.0614192	5.5124	3.53964e-08	4.27401e-07
COBS17582	525.078	0.338464	0.0696318	4.86076	1.16934e-06	1.02114e-05
COBS05483	1032.71	0.33835	0.0546968	6.18591	6.17444e-10	1.0581e-08
COBS11600	2751.97	0.337449	0.0531689	6.34674	2.19923e-10	4.04541e-09
COBS11384	682.828	0.336752	0.0601433	5.59917	2.15382e-08	2.70455e-07
COBS02054	882.409	0.336136	0.0814024	4.12931	3.63856e-05	0.000219969
COBS03391	1356.13	0.334574	0.0603	5.54848	2.88159e-08	3.54883e-07
COBS09728	5535.38	0.334424	0.0514929	6.49457	8.32737e-11	1.63438e-09
COBS13787	4975.62	0.333351	0.0694471	4.80007	1.58607e-06	1.34303e-05
COBS17193	345.769	0.332926	0.0894658	3.72126	0.000198229	0.00096443
COBS12228	718.962	0.332475	0.0891699	3.72856	0.000192576	0.000941959
COBS14792	1143.53	0.331831	0.0682378	4.86286	1.15701e-06	1.01142e-05
COBS05953	374.39	0.331662	0.0741729	4.47148	7.76813e-06	5.60129e-05
COBS10292	539.704	0.331374	0.0480043	6.903	5.09171e-12	1.25058e-10
COBS06272	1225.58	0.33089	0.0765751	4.32112	1.55237e-05	0.000104039
COBS09367	367.375	0.330345	0.067365	4.9038	9.39981e-07	8.39092e-06
COBS07284	950.875	0.328987	0.0567559	5.79653	6.77023e-09	9.50967e-08
COBS13290	647.778	0.328955	0.0706567	4.65568	3.22917e-06	2.54957e-05
COBS05865	770.933	0.328455	0.0853947	3.84631	0.000119908	0.000621503
COBS03047	521.121	0.328448	0.074345	4.41789	9.96687e-06	6.99704e-05
COBS08562	182.823	0.328158	0.0738992	4.44062	8.96997e-06	6.35134e-05
COBS06056	1067.06	0.327815	0.0427726	7.66413	1.80045e-14	6.26035e-13
COBS16359	1834.96	0.327716	0.0548769	5.97183	2.34608e-09	3.64148e-08
COBS14983	450.8	0.327251	0.0874378	3.74266	0.000182079	0.000898496
COBS05804	1395.56	0.327214	0.0874442	3.74197	0.000182581	0.000900204
COBS15243	1377.33	0.326245	0.0538707	6.05607	1.39487e-09	2.26254e-08
COBS09795	334.373	0.326228	0.0871923	3.74147	0.000182944	0.00090148
COBS16489	1267.02	0.326043	0.0455014	7.16556	7.7472e-13	2.16759e-11
COBS11341	929.184	0.325924	0.0850981	3.82999	0.000128151	0.000658304
COBS05882	2087.54	0.325469	0.0876456	3.71346	0.000204443	0.000992703
COBS02510	1796.46	0.325202	0.0774018	4.20148	2.65178e-05	0.000166795
COBS18625	103.193	0.324759	0.0870404	3.73114	0.000190618	0.00093397
COBS05783	587.328	0.324687	0.0736883	4.40622	1.0519e-05	7.34291e-05
COBS12532	1036.11	0.323587	0.0628092	5.15191	2.57852e-07	2.59821e-06
COBS19307	4480.63	0.323246	0.0864835	3.73766	0.00018574	0.000913282
COBS11112	482.123	0.323139	0.0818945	3.94579	7.9536e-05	0.000433152
COBS12081	567.952	0.323086	0.0651769	4.95706	7.15666e-07	6.54048e-06
COBS03022	803.168	0.322483	0.0828451	3.8926	9.91764e-05	0.000526515
COBS06475	3865.03	0.322016	0.0756837	4.25476	2.09274e-05	0.00013616
COBS19301	4274.47	0.321984	0.0831994	3.87003	0.000108821	0.000570537
COBS12445	5558.02	0.321438	0.0588596	5.4611	4.73193e-08	5.55841e-07
COBS03768	363.604	0.320888	0.0738947	4.34251	1.40867e-05	9.51088e-05
COBS02278	875.094	0.320694	0.0445081	7.20529	5.79209e-13	1.64722e-11
COBS02753	3631.81	0.320224	0.047242	6.77837	1.21539e-11	2.76153e-10
COBS08972	975.498	0.319284	0.0570179	5.59971	2.14706e-08	2.70196e-07
COBS06539	1422.95	0.319084	0.0535914	5.95403	2.61625e-09	4.01755e-08
COBS02366	2024.5	0.319081	0.056356	5.66189	1.49712e-08	1.94491e-07
COBS10243	1798.46	0.317923	0.0577648	5.50375	3.71801e-08	4.45825e-07
COBS12275	3240.43	0.317786	0.0488396	6.50673	7.68034e-11	1.51729e-09
COBS07718	2755.57	0.317128	0.0811822	3.90637	9.36914e-05	0.00050016
COBS12354	194.106	0.316488	0.0805963	3.92684	8.60709e-05	0.000464208
COBS10239	616.859	0.316275	0.0679935	4.65155	3.29446e-06	2.59638e-05
COBS16230	978.032	0.315807	0.0654205	4.82734	1.38368e-06	1.18442e-05
COBS14988	2235.94	0.315767	0.0627505	5.03209	4.85149e-07	4.61172e-06
COBS14907	656.974	0.315766	0.0721999	4.37349	1.22276e-05	8.39337e-05
COBS07401	2837.09	0.315362	0.0479121	6.5821	4.63859e-11	9.4806e-10
COBS04681	588.765	0.314944	0.0623337	5.05254	4.35971e-07	4.19965e-06
COBS11581	4327.34	0.314763	0.0459952	6.84339	7.73396e-12	1.8047e-10
COBS08691	483.303	0.314334	0.0817278	3.84611	0.000120008	0.000621835
COBS04362	1835.81	0.3142	0.0767892	4.09172	4.28194e-05	0.000253472
COBS04172	180.335	0.313326	0.0760341	4.12086	3.7746e-05	0.000227011
COBS09391	1249.06	0.313132	0.0678181	4.61724	3.88877e-06	3.00988e-05
COBS18295	334.675	0.313117	0.0715966	4.37335	1.22354e-05	8.39337e-05
COBS09197	771.234	0.313021	0.0688991	4.54318	5.5412e-06	4.15313e-05
COBS05391	854.488	0.312997	0.0725702	4.31302	1.61041e-05	0.000107554
COBS05362	1231.53	0.312622	0.082814	3.77499	0.000160015	0.00080221
COBS13785	1208.6	0.311649	0.0826921	3.76878	0.000164044	0.000820744
COBS03352	416.952	0.311497	0.0782779	3.97938	6.90959e-05	0.000383913
COBS11331	569.872	0.310963	0.0715964	4.34328	1.40368e-05	9.48457e-05
COBS06274	717.442	0.310618	0.0733069	4.23722	2.26301e-05	0.000145248
COBS05814	7803.34	0.310168	0.0640456	4.84292	1.27944e-06	1.10558e-05
COBS06632	2565.09	0.309908	0.0704984	4.39595	1.10288e-05	7.64939e-05
COBS07340	506.254	0.309223	0.0714389	4.32849	1.50132e-05	0.000100813
COBS13921	2889.49	0.308458	0.0504577	6.11321	9.76496e-10	1.61577e-08
COBS19505	849.177	0.307811	0.0753807	4.08341	4.4379e-05	0.000261718
COBS12559	516.849	0.307303	0.0755734	4.06628	4.77685e-05	0.000278854
COBS09529	2933.57	0.30725	0.0522434	5.88113	4.07474e-09	6.04775e-08
COBS07847	2664.53	0.307092	0.0477866	6.42633	1.30725e-10	2.49489e-09
COBS00698	1053.85	0.306979	0.049782	6.16647	6.983e-10	1.18725e-08
COBS04215	3075	0.306899	0.0728563	4.21239	2.52683e-05	0.000160101
COBS02974	354.767	0.306211	0.0661857	4.62654	3.71827e-06	2.89215e-05
COBS05685	435.017	0.305849	0.0821233	3.72426	0.00019589	0.000955197
COBS00265	887.958	0.305822	0.0740084	4.13226	3.59214e-05	0.000217402
COBS17560	667.783	0.305685	0.0692448	4.41455	1.01219e-05	7.09436e-05
COBS03394	673.137	0.305664	0.0732631	4.17215	3.0174e-05	0.000187541
COBS17411	219.459	0.305593	0.0682338	4.47861	7.51314e-06	5.44238e-05
COBS13920	3527	0.305487	0.0463467	6.59135	4.35859e-11	8.96129e-10
COBS02752	671.647	0.305305	0.074731	4.08539	4.40026e-05	0.000259841
COBS13778	246.182	0.305246	0.0750504	4.06722	4.75781e-05	0.00027793
COBS18758	3584.33	0.304436	0.0467405	6.51332	7.35069e-11	1.46093e-09
COBS12960	467.842	0.303975	0.069595	4.36777	1.2552e-05	8.58887e-05
COBS01839	3115.87	0.303744	0.0506583	5.99593	2.02326e-09	3.1746e-08
COBS19508	987.321	0.303414	0.0725366	4.1829	2.8781e-05	0.000179853
COBS18154	854.732	0.303165	0.0548353	5.52865	3.22707e-08	3.93229e-07
COBS13225	647.729	0.302336	0.071444	4.23179	2.31836e-05	0.00014825
COBS18005	615.731	0.302295	0.0642128	4.70771	2.50512e-06	2.03744e-05
COBS19537	737.974	0.302207	0.0799668	3.77916	0.00015736	0.000790962
COBS10487	1835.17	0.301919	0.0685664	4.40332	1.06609e-05	7.42695e-05
COBS07986	3191.86	0.301761	0.0786451	3.837	0.000124545	0.000641402
COBS01445	26619.8	0.300619	0.0736527	4.08157	4.47318e-05	0.000263619
COBS04781	16962.8	0.300327	0.0474841	6.32479	2.53583e-10	4.62521e-09
COBS02293	320.302	0.300005	0.0658537	4.55563	5.22291e-06	3.92991e-05
COBS08306	1137.89	0.299018	0.064104	4.66458	3.09251e-06	2.4495e-05
COBS09552	903.929	0.29842	0.0634606	4.70244	2.57072e-06	2.08361e-05
COBS04958	769.975	0.298074	0.0534767	5.5739	2.49102e-08	3.11115e-07
COBS00333	1113.16	0.297084	0.0624884	4.75423	1.99205e-06	1.65281e-05
COBS12589	842.542	0.296504	0.0580441	5.10825	3.25148e-07	3.21081e-06
COBS10637	1758.56	0.296142	0.0584622	5.06553	4.07259e-07	3.94726e-06
COBS18847	332.604	0.29613	0.0744789	3.97602	7.0078e-05	0.000388745
COBS02371	2922.88	0.294562	0.0493194	5.97254	2.33587e-09	3.62889e-08
COBS04137	1184.76	0.294445	0.0636073	4.6291	3.67251e-06	2.863e-05
COBS12211	538.998	0.294186	0.0679401	4.33007	1.49059e-05	0.000100209
COBS09432	1944.11	0.293919	0.072787	4.03807	5.38936e-05	0.00030949
COBS10632	667.823	0.293459	0.0619026	4.74066	2.13028e-06	1.75887e-05
COBS16399	2978.66	0.291951	0.0759788	3.84254	0.000121767	0.000630194
COBS10285	1961.86	0.291263	0.0606618	4.80142	1.57546e-06	1.33536e-05
COBS16781	1185.94	0.291214	0.0699669	4.16216	3.15247e-05	0.000194101
COBS02940	981.509	0.291102	0.0644152	4.51915	6.20888e-06	4.5899e-05
COBS18019	1747.33	0.290929	0.0702613	4.14067	3.4629e-05	0.000210569
COBS16730	4582.71	0.290714	0.0617901	4.70486	2.54036e-06	2.06319e-05
COBS03006	274.398	0.290709	0.0654503	4.44168	8.92576e-06	6.32263e-05
COBS06440	764.914	0.289231	0.0543325	5.32334	1.01877e-07	1.1121e-06
COBS01148	579.262	0.28875	0.0753342	3.83292	0.000126633	0.000651091
COBS18258	320.466	0.288099	0.0702106	4.10336	4.07198e-05	0.000242674
COBS00129	962.707	0.287762	0.0670647	4.29081	1.78025e-05	0.000117579
COBS11082	201.999	0.28763	0.0652265	4.40971	1.0351e-05	7.23442e-05
COBS16636	989.13	0.287487	0.0593854	4.84103	1.29166e-06	1.11503e-05
COBS03367	704.23	0.287276	0.0558931	5.13975	2.75111e-07	2.75127e-06
COBS01658	523.783	0.285726	0.0590714	4.83695	1.31846e-06	1.13533e-05
COBS12895	1719.36	0.284516	0.0752131	3.78279	0.000155079	0.000780705
COBS08717	1067.2	0.284464	0.0553399	5.1403	2.74295e-07	2.7447e-06
COBS15311	2273.46	0.284061	0.0706635	4.01991	5.8221e-05	0.000330607
COBS11495	1834.75	0.283853	0.0588352	4.82455	1.40323e-06	1.19937e-05
COBS10249	6659.2	0.283049	0.0521905	5.42338	5.8483e-08	6.72807e-07
COBS11356	2146.43	0.283034	0.0498863	5.67358	1.39843e-08	1.83462e-07
COBS19544	3348.78	0.282699	0.0542756	5.20858	1.90291e-07	1.97201e-06
COBS03977	2501.75	0.281277	0.0639617	4.39759	1.09461e-05	7.60725e-05
COBS10077	455.877	0.280515	0.0753382	3.72341	0.000196551	0.000958048
COBS18621	2002.24	0.280505	0.0542031	5.17507	2.27828e-07	2.31864e-06
COBS07429	761.198	0.280132	0.0682512	4.10442	4.05335e-05	0.000241678
COBS06507	1041.55	0.278587	0.0571915	4.87112	1.10969e-06	9.73502e-06
COBS11526	1695.36	0.278557	0.0638469	4.36289	1.28353e-05	8.74479e-05
COBS04276	891.934	0.278234	0.0537736	5.17417	2.2893e-07	2.32712e-06
COBS07853	1359.47	0.276885	0.056736	4.88024	1.05954e-06	9.34723e-06
COBS05482	4891.74	0.276702	0.0408735	6.76972	1.29034e-11	2.9127e-10
COBS10069	2990.01	0.276223	0.0637188	4.33503	1.45739e-05	9.81679e-05
COBS07353	2270.36	0.275885	0.0553252	4.98661	6.14468e-07	5.65148e-06
COBS04800	5011.23	0.275059	0.0465603	5.90759	3.47156e-09	5.21518e-08
COBS06264	3176.5	0.274779	0.0439682	6.24949	4.11801e-10	7.27319e-09
COBS18541	2812.11	0.274497	0.0596266	4.6036	4.15251e-06	3.19826e-05
COBS05143	5432.62	0.274156	0.0598244	4.58268	4.59063e-06	3.49523e-05
COBS10042	1598.91	0.274011	0.0606892	4.51498	6.33214e-06	4.67103e-05
COBS08699	615.887	0.273229	0.0729893	3.7434	0.000181544	0.00089688
COBS01993	578.086	0.272448	0.0585788	4.65097	3.30378e-06	2.60135e-05
COBS04601	1029.53	0.272438	0.0670833	4.06119	4.88232e-05	0.000284257
COBS01618	979.344	0.271601	0.0664822	4.08532	4.40156e-05	0.000259841
COBS07739	2762.68	0.271332	0.0634065	4.27924	1.8753e-05	0.000123152
COBS03316	245.054	0.270851	0.064509	4.19865	2.68509e-05	0.000168706
COBS05085	2147.57	0.27046	0.0704881	3.83697	0.000124564	0.000641402
COBS10485	660.514	0.269651	0.066028	4.08389	4.42886e-05	0.000261363
COBS08333	957.972	0.267885	0.0571114	4.69057	2.72439e-06	2.19308e-05
COBS01116	987.446	0.267725	0.0520755	5.1411	2.73136e-07	2.73468e-06
COBS02451	1101.2	0.267517	0.0509274	5.25292	1.49707e-07	1.58226e-06
COBS11336	565.602	0.266846	0.0444062	6.00921	1.86426e-09	2.94651e-08
COBS14448	1126.18	0.265975	0.0623806	4.26375	2.01021e-05	0.000131214
COBS08558	549.62	0.265774	0.0562847	4.72196	2.33583e-06	1.9178e-05
COBS17410	998.359	0.26558	0.0514368	5.16324	2.42714e-07	2.45596e-06
COBS13625	2208.91	0.265205	0.0546441	4.85331	1.21417e-06	1.0534e-05
COBS05719	4699.33	0.264704	0.0537289	4.92667	8.36447e-07	7.52889e-06
COBS03759	827.129	0.263385	0.062118	4.24008	2.23445e-05	0.000143574
COBS11078	1652.48	0.262545	0.0578216	4.54061	5.6093e-06	4.1969e-05
COBS10126	699.131	0.262183	0.0610954	4.29137	1.77574e-05	0.000117389
COBS06879	1258.12	0.261993	0.0503766	5.20069	1.98552e-07	2.04842e-06
COBS19529	476.635	0.261614	0.0695347	3.76235	0.000168325	0.000840214
COBS04980	1397.64	0.260948	0.0608081	4.29134	1.77596e-05	0.000117389
COBS17169	1402.78	0.260771	0.0463513	5.62598	1.84463e-08	2.35565e-07
COBS03001	808.717	0.260641	0.0619808	4.20519	2.60863e-05	0.000164411
COBS03018	1663.87	0.260438	0.0512689	5.07985	3.77735e-07	3.68798e-06
COBS17676	2101.63	0.260429	0.0629457	4.13736	3.51318e-05	0.000213295
COBS16905	583.502	0.259647	0.0695232	3.73468	0.000187953	0.000922742
COBS18092	867.962	0.258496	0.0555762	4.6512	3.30011e-06	2.59964e-05
COBS16425	1157.68	0.257969	0.0527638	4.88912	1.01286e-06	8.96286e-06
COBS09556	1502.47	0.257071	0.0593542	4.33113	1.48347e-05	9.9808e-05
COBS02309	1947.92	0.255624	0.0624009	4.09648	4.19472e-05	0.00024899
COBS04365	2556.67	0.254024	0.050293	5.05089	4.39763e-07	4.22912e-06
COBS02331	380.97	0.253943	0.0664168	3.82348	0.000131583	0.000674336
COBS05730	747.077	0.253824	0.0531816	4.77278	1.81699e-06	1.52661e-05
COBS11020	2684.99	0.25354	0.0462028	5.48756	4.07533e-08	4.85306e-07
COBS14256	670.841	0.253307	0.0630626	4.01675	5.90057e-05	0.000334624
COBS08695	785.014	0.253003	0.0677918	3.73207	0.000189916	0.000931057
COBS17229	1405.47	0.252982	0.0669538	3.77845	0.000157806	0.000792284
COBS15231	290.63	0.252289	0.0662613	3.80748	0.000140388	0.000713537
COBS01796	663.863	0.25032	0.0518179	4.83076	1.36011e-06	1.1654e-05
COBS07051	780.288	0.250303	0.0606975	4.12378	3.72699e-05	0.000224777
COBS17697	1509.22	0.249545	0.0599788	4.16055	3.17482e-05	0.000195081
COBS18849	924.655	0.248463	0.0452227	5.49422	3.92447e-08	4.68309e-07
COBS02488	820.156	0.248379	0.0572257	4.34034	1.42265e-05	9.59776e-05
COBS18682	816.326	0.248155	0.0586213	4.23318	2.30405e-05	0.000147444
COBS01740	644.411	0.247421	0.0606709	4.07809	4.54072e-05	0.000266962
COBS12080	1259.36	0.246684	0.0503702	4.89741	9.71084e-07	8.63735e-06
COBS16679	2405.23	0.246485	0.0563522	4.37401	1.21985e-05	8.38632e-05
COBS09720	585.42	0.245254	0.0562143	4.36285	1.28381e-05	8.74479e-05
COBS00080	3182.96	0.243999	0.0476393	5.12181	3.02611e-07	3.01062e-06
COBS17177	2917.36	0.243147	0.0415911	5.84613	5.03128e-09	7.32906e-08
COBS04663	494.718	0.241952	0.0642918	3.76334	0.000167657	0.000837591
COBS16780	981.785	0.240628	0.0644515	3.73347	0.00018886	0.000926929
COBS05978	3663.49	0.24002	0.0618623	3.87991	0.000104497	0.000550705
COBS10053	686.468	0.238524	0.0622049	3.83448	0.000125829	0.000647342
COBS14794	808.566	0.238204	0.0608941	3.91177	9.16224e-05	0.000490629
COBS14695	801.516	0.237498	0.0559151	4.24747	2.16199e-05	0.000139906
COBS11423	3413.82	0.236523	0.0556123	4.25307	2.10863e-05	0.000137017
COBS06650	3832.68	0.235958	0.0406128	5.80994	6.2497e-09	8.85767e-08
COBS02732	3915.87	0.23507	0.0598916	3.92493	8.67563e-05	0.000467467
COBS08256	1064.95	0.234169	0.0554372	4.22404	2.39965e-05	0.000152939
COBS18697	1662.81	0.233268	0.0507131	4.59977	4.22963e-06	3.25042e-05
COBS04095	2762.02	0.232385	0.0376008	6.18033	6.39696e-10	1.09406e-08
COBS06881	5441.22	0.231954	0.0560044	4.14172	3.44716e-05	0.000210024
COBS14961	13619.8	0.231491	0.0510053	4.53857	5.66382e-06	4.23403e-05
COBS19864	2382.41	0.230917	0.0494321	4.67141	2.99144e-06	2.38254e-05
COBS00116	2452.47	0.229806	0.0363387	6.324	2.54873e-10	4.63895e-09
COBS04965	976.59	0.229635	0.0539275	4.25822	2.06064e-05	0.000134252
COBS06859	3042.4	0.229516	0.0527468	4.35127	1.35353e-05	9.17082e-05
COBS19622	1672.4	0.227663	0.0506062	4.49871	6.83668e-06	5.01541e-05
COBS19473	910.091	0.22702	0.0591415	3.8386	0.00012374	0.000638621
COBS07508	489.103	0.226555	0.0552895	4.09762	4.17424e-05	0.000248201
COBS05079	1597.43	0.225856	0.0541294	4.17252	3.01254e-05	0.000187441
COBS11529	545.747	0.225808	0.0596225	3.78729	0.0001523	0.000768882
COBS11602	1526.2	0.225061	0.0563163	3.99636	6.43228e-05	0.000360754
COBS11300	1406.64	0.224219	0.048342	4.63819	3.51481e-06	2.74501e-05
COBS18087	1078.01	0.223401	0.0438626	5.09321	3.5206e-07	3.45682e-06
COBS11338	565.596	0.223236	0.0504647	4.42361	9.70644e-06	6.82807e-05
COBS05490	1412.88	0.223063	0.0524636	4.25177	2.12089e-05	0.000137607
COBS10754	1033.76	0.222814	0.0376449	5.91884	3.24216e-09	4.88328e-08
COBS19540	1869.19	0.222591	0.0558277	3.98711	6.6882e-05	0.000373051
COBS10028	351.338	0.2193	0.0588728	3.72497	0.000195336	0.000952767
COBS06289	1164.18	0.218309	0.0486393	4.48832	7.1786e-06	5.23293e-05
COBS06852	2855.63	0.218232	0.0445506	4.89852	9.65599e-07	8.60184e-06
COBS13289	617.711	0.216967	0.0530374	4.09083	4.29833e-05	0.000254354
COBS06125	2428.38	0.216707	0.0576528	3.75883	0.000170711	0.000850651
COBS16759	7216.24	0.216523	0.0513359	4.21776	2.46738e-05	0.000156736
COBS01754	852.084	0.21636	0.0558574	3.87344	0.000107309	0.00056374
COBS06556	3037.77	0.214329	0.0409966	5.22797	1.71379e-07	1.78836e-06
COBS12597	1184.68	0.213296	0.0517933	4.11821	3.81822e-05	0.000229239
COBS03347	15435.7	0.213211	0.0561366	3.79807	0.000145825	0.000739433
COBS15395	1033.22	0.212114	0.0538076	3.94208	8.07773e-05	0.00043922
COBS07879	8589.54	0.211365	0.0436497	4.84229	1.28349e-06	1.10854e-05
COBS16927	1996.18	0.210986	0.0446226	4.72823	2.26482e-06	1.86215e-05
COBS14521	754.695	0.210529	0.054012	3.89783	9.70593e-05	0.000516068
COBS06099	1413.29	0.209615	0.052433	3.99776	6.39449e-05	0.000359218
COBS16796	5403.99	0.208612	0.0400578	5.20776	1.91134e-07	1.97662e-06
COBS05812	812.827	0.207752	0.0483381	4.2979	1.72425e-05	0.000114493
COBS18367	2909	0.207411	0.0382008	5.4295	5.65128e-08	6.52312e-07
COBS00133	2223.72	0.206993	0.0548983	3.77048	0.000162932	0.000815804
COBS06767	2459.83	0.206646	0.0441831	4.67703	2.91063e-06	2.3246e-05
COBS16226	2775.94	0.206387	0.0531473	3.88331	0.000103045	0.000544379
COBS15734	7869.44	0.205529	0.0436574	4.70776	2.50448e-06	2.03744e-05
COBS17674	334.712	0.204983	0.0548378	3.73799	0.000185495	0.000912487
COBS16152	1764.22	0.204699	0.0346811	5.90231	3.5844e-09	5.38002e-08
COBS10738	4504.86	0.204676	0.0395561	5.17431	2.28752e-07	2.32667e-06
COBS15439	3505.49	0.203997	0.0468278	4.35633	1.32262e-05	8.98599e-05
COBS11175	3221.45	0.202081	0.0461088	4.38271	1.17215e-05	8.09407e-05
COBS11957	487.143	0.201807	0.0542188	3.72209	0.000197583	0.000961824
COBS18163	1769.11	0.200246	0.0468971	4.2699	1.95563e-05	0.000127844
COBS05288	8666.92	0.19982	0.0421661	4.73888	2.14905e-06	1.77202e-05
COBS17112	3977.5	0.197448	0.0471235	4.19001	2.78938e-05	0.000174877
COBS08810	24984.8	0.196415	0.0428656	4.58211	4.60307e-06	3.50315e-05
COBS00931	2770.1	0.1902	0.0363398	5.23395	1.65927e-07	1.73566e-06
COBS12062	1903	0.189658	0.0363254	5.22109	1.7787e-07	1.85274e-06
COBS11319	1738.39	0.188919	0.0475538	3.97274	7.10509e-05	0.000393007
COBS12402	1486.84	0.188795	0.0438793	4.30259	1.68811e-05	0.000112223
COBS05419	6368.63	0.185974	0.0497257	3.74	0.000184023	0.000906019
COBS15434	4527.97	0.177995	0.040194	4.42839	9.49381e-06	6.69211e-05
COBS11586	1884.07	0.177864	0.0477118	3.72789	0.000193092	0.000943418
COBS17931	1296.04	0.1729	0.0464818	3.71974	0.000199428	0.000969989
COBS07644	2907.7	0.169935	0.0437234	3.88658	0.000101667	0.000538415
COBS05768	2371.12	0.155836	0.0377513	4.12795	3.66004e-05	0.000221047
COBS07450	5276.96	0.154989	0.040369	3.83931	0.00012338	0.000637018
COBS01647	922.181	-0.198075	0.0475614	-4.16461	3.11882e-05	0.000192461
COBS18921	735.473	-0.205774	0.0527479	-3.90109	9.57589e-05	0.000509898
COBS19461	2002.88	-0.208679	0.048569	-4.29655	1.7348e-05	0.000115105
COBS00978	852.023	-0.210491	0.055303	-3.80614	0.000141155	0.000717222
COBS12975	1172.34	-0.211618	0.0376205	-5.62508	1.8542e-08	2.36613e-07
COBS10777	3198.74	-0.212782	0.0542378	-3.92313	8.74068e-05	0.00047024
COBS12276	2160.69	-0.2132	0.0506998	-4.20515	2.60913e-05	0.000164411
COBS06320	4086.02	-0.227378	0.0565613	-4.02003	5.81909e-05	0.000330545
COBS08546	2223.03	-0.230828	0.0579825	-3.98099	6.8628e-05	0.000381927
COBS04012	3341.49	-0.235333	0.0436926	-5.38611	7.19994e-08	8.13156e-07
COBS09033	639.034	-0.237217	0.0602009	-3.94042	8.13377e-05	0.000441279
COBS07506	747.201	-0.237669	0.0586571	-4.05184	5.08173e-05	0.000294268
COBS00973	842.506	-0.243473	0.0589572	-4.12965	3.63315e-05	0.00021973
COBS09691	1832.52	-0.244125	0.0578076	-4.22307	2.41001e-05	0.000153543
COBS10183	733.925	-0.244847	0.0588233	-4.16241	3.14903e-05	0.000194083
COBS08249	331.706	-0.244872	0.063044	-3.88414	0.000102693	0.000542849
COBS06284	797.376	-0.249738	0.0565435	-4.41674	1.00201e-05	7.02869e-05
COBS13977	685.646	-0.251657	0.0592045	-4.25063	2.13167e-05	0.000138047
COBS02535	613.699	-0.252844	0.0612653	-4.12703	3.67481e-05	0.000221861
COBS01758	328.86	-0.254505	0.061921	-4.11016	3.95387e-05	0.000236726
COBS18364	1341.85	-0.256626	0.0581496	-4.41321	1.01847e-05	7.13261e-05
COBS18942	635.571	-0.257954	0.0674996	-3.82156	0.000132608	0.000678736
COBS18300	687.821	-0.257998	0.0463204	-5.56987	2.54929e-08	3.17578e-07
COBS19763	181.896	-0.258393	0.068371	-3.77928	0.000157284	0.000790809
COBS14440	1930.61	-0.258938	0.0486888	-5.31822	1.04787e-07	1.13968e-06
COBS17685	423.906	-0.2615	0.0615917	-4.24571	2.17902e-05	0.000140588
COBS13257	380.691	-0.263653	0.0607526	-4.33978	1.42622e-05	9.61435e-05
COBS02388	248.528	-0.264631	0.0669795	-3.95092	7.78509e-05	0.000425314
COBS19127	1071.22	-0.265387	0.0448764	-5.91373	3.34452e-09	5.0287e-08
COBS02102	342.906	-0.26658	0.0674921	-3.9498	7.82179e-05	0.000426914
COBS04935	410.853	-0.268196	0.0712257	-3.76543	0.00016626	0.000831589
COBS15152	927.825	-0.268847	0.0670535	-4.00944	6.08622e-05	0.000343686
COBS06032	417.708	-0.268853	0.0654085	-4.11036	3.95036e-05	0.000236679
COBS13695	355.852	-0.268973	0.0682961	-3.93834	8.20474e-05	0.000444449
COBS06530	386.262	-0.269128	0.06975	-3.85846	0.000114103	0.00059552
COBS03982	8247.84	-0.269194	0.0698721	-3.85267	0.000116838	0.000607226
COBS01152	426.641	-0.269951	0.0662283	-4.07607	4.58025e-05	0.000269012
COBS04822	1021.26	-0.270229	0.0491467	-5.49841	3.83236e-08	4.58266e-07
COBS09958	1612.17	-0.271139	0.0638496	-4.24653	2.17109e-05	0.00014039
COBS04751	559.259	-0.273721	0.0687848	-3.97938	6.90957e-05	0.000383913
COBS11017	7374.81	-0.273741	0.044174	-6.19689	5.75912e-10	9.95809e-09
COBS17027	366.864	-0.274072	0.058329	-4.69873	2.61785e-06	2.11817e-05
COBS04468	5464.32	-0.275396	0.0506897	-5.43298	5.54219e-08	6.41863e-07
COBS15210	975.22	-0.275417	0.0577988	-4.76511	1.88754e-06	1.57821e-05
COBS13282	1151.63	-0.276851	0.0622971	-4.44405	8.82823e-06	6.26381e-05
COBS08777	1013.42	-0.277729	0.0623384	-4.45518	8.38218e-06	5.9891e-05
COBS06078	380.591	-0.279998	0.0515048	-5.43635	5.43837e-08	6.30879e-07
COBS02149	1522.04	-0.280271	0.0557283	-5.02924	4.92417e-07	4.66542e-06
COBS07359	405.405	-0.281736	0.0741061	-3.8018	0.00014365	0.000729259
COBS06546	670.966	-0.281976	0.0612499	-4.6037	4.15048e-06	3.19813e-05
COBS05705	1842.65	-0.283017	0.064508	-4.38732	1.14755e-05	7.94011e-05
COBS08975	576.031	-0.284256	0.0715936	-3.97042	7.17474e-05	0.00039648
COBS06854	971.028	-0.284287	0.0654693	-4.3423	1.40999e-05	9.51607e-05
COBS06456	272.23	-0.28627	0.0697411	-4.10475	4.04753e-05	0.000241414
COBS17174	318.003	-0.29022	0.0676522	-4.28988	1.7877e-05	0.000118026
COBS02343	1854.05	-0.290932	0.0653607	-4.45117	8.54029e-06	6.08949e-05
COBS18598	233.574	-0.291099	0.0751535	-3.8734	0.000107329	0.00056374
COBS18640	316.15	-0.29395	0.078239	-3.75708	0.000171909	0.000855638
COBS08612	460.417	-0.295707	0.0657562	-4.49702	6.89133e-06	5.04858e-05
COBS04591	582.265	-0.296277	0.0721591	-4.10589	4.02769e-05	0.000240646
COBS14026	848.398	-0.296279	0.0603279	-4.91114	9.0548e-07	8.10386e-06
COBS19034	263.948	-0.296478	0.0776679	-3.81725	0.000134948	0.000688723
COBS16251	474.166	-0.296619	0.0756974	-3.91849	8.91058e-05	0.000478338
COBS11882	603.853	-0.297926	0.0680191	-4.38003	1.18661e-05	8.1809e-05
COBS03697	1713.23	-0.298055	0.0524537	-5.68225	1.32933e-08	1.74928e-07
COBS08179	3424.13	-0.29827	0.0664903	-4.48591	7.26038e-06	5.28142e-05
COBS06452	286.276	-0.299909	0.0587939	-5.10102	3.37828e-07	3.32653e-06
COBS18839	1066.09	-0.301646	0.0512004	-5.89148	3.82752e-09	5.70148e-08
COBS12480	617.538	-0.302796	0.0729073	-4.15316	3.2791e-05	0.00020083
COBS18813	485.029	-0.30341	0.0660459	-4.59392	4.34999e-06	3.33403e-05
COBS08851	424.042	-0.303899	0.0766704	-3.9637	7.37958e-05	0.000405724
COBS10190	1234.39	-0.306632	0.058876	-5.2081	1.90784e-07	1.97517e-06
COBS05724	837.032	-0.30721	0.0804384	-3.8192	0.000133886	0.000683907
COBS10713	256.085	-0.307254	0.0774511	-3.96707	7.27602e-05	0.000400656
COBS05795	919.729	-0.30728	0.0717489	-4.28271	1.84629e-05	0.000121385
COBS03258	209.635	-0.307954	0.0771604	-3.99109	6.57708e-05	0.000367802
COBS15375	342.26	-0.308878	0.0649458	-4.75593	1.97533e-06	1.6413e-05
COBS11150	3929.31	-0.308943	0.072524	-4.25988	2.04539e-05	0.000133309
COBS02719	543.984	-0.309304	0.0798969	-3.87129	0.00010826	0.000568283
COBS09824	2016.11	-0.309884	0.081891	-3.7841	0.000154265	0.000777667
COBS06929	362.225	-0.309925	0.0766812	-4.04174	5.30565e-05	0.000305698
COBS16020	633.457	-0.314041	0.0793677	-3.95679	7.59626e-05	0.000415787
COBS12985	604.741	-0.314349	0.073921	-4.25249	2.11403e-05	0.000137265
COBS17800	469.985	-0.314758	0.0695269	-4.52713	5.97894e-06	4.43699e-05
COBS04810	557.086	-0.314857	0.0803123	-3.9204	8.84013e-05	0.000474999
COBS02873	5206.3	-0.315098	0.0588523	-5.35404	8.6012e-08	9.55347e-07
COBS04793	728.519	-0.31586	0.05308	-5.95065	2.6708e-09	4.09042e-08
COBS03691	1697.75	-0.316463	0.0758513	-4.17215	3.01737e-05	0.000187541
COBS15699	1572.13	-0.316704	0.0595725	-5.31628	1.0591e-07	1.15103e-06
COBS03692	274.889	-0.317149	0.0683694	-4.63876	3.50505e-06	2.73987e-05
COBS03365	200.921	-0.318388	0.0846056	-3.7632	0.000167751	0.000837591
COBS08588	790.342	-0.320216	0.0695976	-4.60096	4.20555e-06	3.23336e-05
COBS15978	781.793	-0.321239	0.0808469	-3.97342	7.08486e-05	0.000392265
COBS09438	405.684	-0.322269	0.0838726	-3.84237	0.000121853	0.00063027
COBS01852	508.428	-0.323081	0.066497	-4.85859	1.18225e-06	1.02984e-05
COBS05960	349.037	-0.323508	0.0689402	-4.6926	2.69759e-06	2.17556e-05
COBS10186	213.069	-0.323904	0.0860473	-3.76426	0.000167044	0.000834786
COBS02894	289.221	-0.325364	0.0765352	-4.25116	2.12662e-05	0.000137772
COBS13568	389.269	-0.325595	0.0607994	-5.35523	8.54466e-08	9.51356e-07
COBS02502	678.666	-0.325864	0.0688687	-4.73167	2.22675e-06	1.83259e-05
COBS15543	1349.63	-0.326209	0.0651171	-5.00958	5.4549e-07	5.09841e-06
COBS16059	1247.51	-0.326376	0.080928	-4.03292	5.50883e-05	0.000314886
COBS15041	768.848	-0.327206	0.0726981	-4.50088	6.76727e-06	4.96659e-05
COBS05805	217.95	-0.328035	0.0705697	-4.64838	3.34557e-06	2.63066e-05
COBS09884	1061.61	-0.329175	0.0657577	-5.00588	5.56084e-07	5.18622e-06
COBS17457	478.221	-0.33005	0.0750155	-4.39975	1.08376e-05	7.53793e-05
COBS17683	456.877	-0.330453	0.0626917	-5.27108	1.35621e-07	1.44665e-06
COBS03693	590.098	-0.330653	0.0701012	-4.7168	2.39584e-06	1.96055e-05
COBS05302	465.891	-0.331028	0.0693772	-4.77142	1.82931e-06	1.53541e-05
COBS04628	201.559	-0.331052	0.0721213	-4.59022	4.42783e-06	3.38618e-05
COBS09199	319.85	-0.33106	0.0784891	-4.21791	2.46574e-05	0.000156689
COBS12992	246.335	-0.331378	0.0890359	-3.72185	0.000197769	0.000962462
COBS15191	181.874	-0.333637	0.0748341	-4.45835	8.25923e-06	5.91368e-05
COBS02786	1319.04	-0.333789	0.0559616	-5.96461	2.45224e-09	3.79263e-08
COBS08951	170.924	-0.334206	0.0890065	-3.75485	0.000173447	0.000862299
COBS06348	227.26	-0.335122	0.0787999	-4.25282	2.11099e-05	0.000137119
COBS16819	446.358	-0.335641	0.0894028	-3.75426	0.000173856	0.000863588
COBS08592	229.037	-0.335746	0.069858	-4.80612	1.53886e-06	1.30626e-05
COBS17785	415.937	-0.33589	0.0797062	-4.21411	2.50768e-05	0.00015912
COBS17583	1417.77	-0.335933	0.0725159	-4.63255	3.61198e-06	2.81963e-05
COBS19798	288.644	-0.336871	0.081476	-4.13461	3.55565e-05	0.000215571
COBS12288	353.788	-0.338804	0.085983	-3.94036	8.136e-05	0.000441279
COBS10817	605.464	-0.338937	0.0794106	-4.26815	1.971e-05	0.0001288
COBS18199	4178.29	-0.339347	0.0869989	-3.90059	9.59588e-05	0.000510688
COBS15585	515.749	-0.339562	0.0784645	-4.32759	1.5075e-05	0.000101189
COBS06492	371.196	-0.339824	0.0875434	-3.88177	0.000103697	0.000546987
COBS01980	246.113	-0.340603	0.076281	-4.46511	8.00271e-06	5.75124e-05
COBS05380	398.108	-0.340724	0.0668468	-5.09708	3.44926e-07	3.39256e-06
COBS12611	2124	-0.344584	0.0918386	-3.75206	0.000175389	0.00086945
COBS06080	489.323	-0.345057	0.0684585	-5.04039	4.64586e-07	4.44066e-06
COBS14055	2706.92	-0.34594	0.0755131	-4.58119	4.62335e-06	3.51395e-05
COBS01065	453.413	-0.346271	0.0768181	-4.50767	6.55432e-06	4.82464e-05
COBS11002	584.266	-0.3465	0.0857945	-4.03872	5.37437e-05	0.00030904
COBS06379	226.548	-0.346508	0.0726883	-4.76705	1.86945e-06	1.5646e-05
COBS11686	338.631	-0.347381	0.0851011	-4.08198	4.46545e-05	0.000263253
COBS04749	321.243	-0.347425	0.0633651	-5.48291	4.18382e-08	4.96176e-07
COBS02308	479.533	-0.348474	0.066366	-5.25079	1.51451e-07	1.59776e-06
COBS12121	209.604	-0.348754	0.082711	-4.21654	2.48078e-05	0.000157471
COBS06896	1210.9	-0.349419	0.0538817	-6.48492	8.87787e-11	1.73063e-09
COBS07335	744.233	-0.350649	0.0720617	-4.86595	1.13908e-06	9.98265e-06
COBS10601	567.739	-0.351222	0.0887238	-3.95861	7.53885e-05	0.000413036
COBS02216	340.745	-0.352081	0.0762642	-4.6166	3.9008e-06	3.01784e-05
COBS18535	542.543	-0.352189	0.0763613	-4.61214	3.98545e-06	3.07782e-05
COBS01617	444.971	-0.352632	0.0788567	-4.47181	7.75601e-06	5.59488e-05
COBS00922	373.743	-0.354113	0.0648259	-5.46252	4.69419e-08	5.52372e-07
COBS18550	478.593	-0.354165	0.0857464	-4.13038	3.62168e-05	0.000219113
COBS05723	401.7	-0.354216	0.0809851	-4.37384	1.22077e-05	8.38632e-05
COBS10079	421.067	-0.357621	0.076312	-4.6863	2.78193e-06	2.23524e-05
COBS05168	359.867	-0.357816	0.0854003	-4.18987	2.79116e-05	0.000174926
COBS10519	480.753	-0.357879	0.0862064	-4.15142	3.30413e-05	0.000202165
COBS06409	757.708	-0.358499	0.0866069	-4.13938	3.4824e-05	0.000211649
COBS18996	99.9737	-0.35897	0.0932697	-3.84873	0.00011873	0.00061595
COBS01654	507.483	-0.359179	0.0791859	-4.5359	5.73596e-06	4.27318e-05
COBS14019	811.812	-0.359542	0.089547	-4.01512	5.94145e-05	0.000336611
COBS17372	822.489	-0.359571	0.0681214	-5.27839	1.30322e-07	1.39443e-06
COBS03176	245.716	-0.360243	0.0920531	-3.91342	9.09983e-05	0.000487892
COBS02933	340.174	-0.360275	0.0807489	-4.46167	8.13228e-06	5.83372e-05
COBS05954	159.247	-0.360563	0.0864441	-4.17106	3.03186e-05	0.000188304
COBS06528	219.113	-0.361079	0.0748443	-4.8244	1.40426e-06	1.19965e-05
COBS18327	336.325	-0.362146	0.0779426	-4.64632	3.3791e-06	2.65461e-05
COBS05387	30085.4	-0.362224	0.0911517	-3.97386	7.07174e-05	0.000391728
COBS12624	305.707	-0.362546	0.0893792	-4.05626	4.98638e-05	0.000289424
COBS13851	141.707	-0.362553	0.0888893	-4.0787	4.52891e-05	0.000266449
COBS13264	120.996	-0.362557	0.0882256	-4.10943	3.96641e-05	0.000237312
COBS03389	2419.15	-0.36391	0.0551839	-6.59449	4.26726e-11	8.80491e-10
COBS14989	494.045	-0.364756	0.0819834	-4.44915	8.62112e-06	6.12943e-05
COBS18313	352.746	-0.365607	0.0856186	-4.27018	1.95312e-05	0.000127728
COBS14499	590.715	-0.36626	0.0792198	-4.62334	3.77615e-06	2.9319e-05
COBS07170	1374.63	-0.366751	0.0502214	-7.30268	2.82087e-13	8.36632e-12
COBS03379	752.404	-0.367613	0.0764522	-4.8084	1.5214e-06	1.29207e-05
COBS15227	382.622	-0.368227	0.0984126	-3.74167	0.000182805	0.000901048
COBS17526	357.744	-0.368281	0.0753044	-4.89057	1.00546e-06	8.90194e-06
COBS06752	917.076	-0.368436	0.0911107	-4.04383	5.25851e-05	0.000303589
COBS13176	1388.58	-0.369109	0.080765	-4.57016	4.87341e-06	3.68779e-05
COBS10785	793.062	-0.369191	0.0887037	-4.16207	3.15374e-05	0.000194101
COBS02942	230.638	-0.369634	0.0927522	-3.98517	6.74306e-05	0.000375868
COBS10967	421.539	-0.369782	0.0901199	-4.10323	4.07428e-05	0.000242674
COBS05299	822.735	-0.369847	0.0681613	-5.42605	5.76141e-08	6.64137e-07
COBS12958	555.889	-0.370138	0.0617416	-5.99495	2.03545e-09	3.19084e-08
COBS12516	699.736	-0.370375	0.0624149	-5.93409	2.95481e-09	4.46996e-08
COBS15952	388.457	-0.370633	0.085916	-4.3139	1.604e-05	0.000107208
COBS10000	373.926	-0.371933	0.0726954	-5.11632	3.11552e-07	3.09245e-06
COBS05487	603.749	-0.372232	0.065295	-5.70078	1.19263e-08	1.57935e-07
COBS00722	441.45	-0.37286	0.0943363	-3.95245	7.73545e-05	0.00042287
COBS16668	367.598	-0.37294	0.0913286	-4.0835	4.4363e-05	0.000261713
COBS06532	306.623	-0.373561	0.0822437	-4.54212	5.56916e-06	4.17048e-05
COBS13852	181.957	-0.373655	0.0862817	-4.33064	1.48677e-05	9.99915e-05
COBS12868	294.022	-0.37422	0.0748732	-4.99805	5.79142e-07	5.36653e-06
COBS12111	139.019	-0.374569	0.0958737	-3.9069	9.34878e-05	0.000499381
COBS04597	314.149	-0.37633	0.0613296	-6.13618	8.45268e-10	1.41761e-08
COBS10674	380.396	-0.376461	0.0874206	-4.30632	1.65993e-05	0.000110562
COBS18504	1635.54	-0.376568	0.0608319	-6.19031	6.00467e-10	1.03207e-08
COBS10598	1712.67	-0.376595	0.0886787	-4.24674	2.16907e-05	0.000140312
COBS14789	218.866	-0.376822	0.0792261	-4.75628	1.97188e-06	1.63922e-05
COBS12086	916.355	-0.377818	0.0907791	-4.16195	3.15545e-05	0.000194101
COBS16190	380.322	-0.377955	0.0976716	-3.86965	0.000108989	0.000571245
COBS18369	144.974	-0.378373	0.0940517	-4.02304	5.74529e-05	0.00032689
COBS07069	1906.13	-0.379919	0.0517962	-7.33488	2.21926e-13	6.66202e-12
COBS04769	1613.1	-0.381876	0.0707105	-5.40056	6.64336e-08	7.5722e-07
COBS00760	228.711	-0.382515	0.0826578	-4.6277	3.69751e-06	2.8786e-05
COBS14020	155.56	-0.383095	0.0921134	-4.15895	3.19715e-05	0.000196244
COBS12629	387.266	-0.383289	0.0767789	-4.99212	5.97216e-07	5.51775e-06
COBS02526	496.148	-0.383432	0.0569953	-6.72743	1.72685e-11	3.8037e-10
COBS07721	1862.77	-0.383439	0.0813421	-4.71391	2.43012e-06	1.98673e-05
COBS03834	373.188	-0.38359	0.0794054	-4.83077	1.36005e-06	1.1654e-05
COBS09390	291.327	-0.384767	0.0669077	-5.75071	8.8867e-09	1.20612e-07
COBS19067	359.364	-0.3848	0.100485	-3.82944	0.000128436	0.000659576
COBS10327	803.155	-0.384805	0.101696	-3.78387	0.000154409	0.000778165
COBS16414	240.405	-0.384928	0.0793498	-4.85103	1.22823e-06	1.06507e-05
COBS13627	70.5411	-0.385752	0.100269	-3.84718	0.000119488	0.000619508
COBS10530	364.142	-0.386181	0.0683906	-5.6467	1.63558e-08	2.10266e-07
COBS19705	1131.9	-0.386212	0.0621998	-6.20921	5.32524e-10	9.24485e-09
COBS10185	486.664	-0.386328	0.066923	-5.77273	7.79976e-09	1.0772e-07
COBS18200	303.035	-0.38694	0.0938545	-4.12276	3.74358e-05	0.000225462
COBS06876	743.539	-0.387106	0.0853359	-4.53627	5.72581e-06	4.26745e-05
COBS16832	293.47	-0.387416	0.0870697	-4.44949	8.60741e-06	6.12472e-05
COBS17374	2613.31	-0.388219	0.0615003	-6.31248	2.74603e-10	4.9719e-09
COBS06668	571.992	-0.389079	0.0543034	-7.16491	7.78397e-13	2.17436e-11
COBS07287	605.888	-0.389393	0.102708	-3.79126	0.000149887	0.000757804
COBS16917	318.334	-0.389793	0.0762688	-5.11078	3.20827e-07	3.17358e-06
COBS07219	319.045	-0.390082	0.100255	-3.89091	9.98684e-05	0.000529864
COBS02961	1025.93	-0.39068	0.0565053	-6.91405	4.71025e-12	1.1635e-10
COBS18496	246.995	-0.391168	0.0987658	-3.96056	7.47732e-05	0.000410315
COBS19631	204.538	-0.391986	0.0711822	-5.5068	3.65423e-08	4.38904e-07
COBS02860	275.802	-0.393133	0.0846686	-4.64319	3.43063e-06	2.6902e-05
COBS17227	139.049	-0.393505	0.0813835	-4.83519	1.3302e-06	1.1443e-05
COBS09317	107.742	-0.393558	0.0966038	-4.07394	4.62247e-05	0.000271123
COBS02150	309.647	-0.393867	0.077562	-5.07809	3.81256e-07	3.71816e-06
COBS07727	329.653	-0.394167	0.0709849	-5.55284	2.81069e-08	3.47388e-07
COBS17488	254.179	-0.394215	0.0835323	-4.71931	2.36646e-06	1.94035e-05
COBS15984	199.344	-0.394713	0.0890443	-4.43277	9.30297e-06	6.5683e-05
COBS18824	658.05	-0.395518	0.102074	-3.8748	0.000106712	0.000561007
COBS08856	125.31	-0.395691	0.0941685	-4.20194	2.64637e-05	0.000166515
COBS01381	189.933	-0.395982	0.103882	-3.81185	0.000137932	0.000702914
COBS17384	339.558	-0.396466	0.100688	-3.93756	8.23131e-05	0.00044547
COBS11058	2837.64	-0.39651	0.056097	-7.06829	1.56856e-12	4.1662e-11
COBS10528	320.594	-0.396773	0.0692184	-5.73219	9.91441e-09	1.32686e-07
COBS11067	811.481	-0.397247	0.0841445	-4.72101	2.34676e-06	1.92586e-05
COBS15674	180.61	-0.397497	0.0987104	-4.0269	5.65164e-05	0.000322027
COBS03178	343.331	-0.398325	0.0756636	-5.26442	1.40635e-07	1.49368e-06
COBS06870	333.071	-0.399207	0.0793918	-5.02832	4.94788e-07	4.68274e-06
COBS07524	318.794	-0.3996	0.0977568	-4.08769	4.35688e-05	0.000257379
COBS02528	1444.66	-0.400075	0.0470158	-8.50939	1.74851e-17	9.81606e-16
COBS07788	370.934	-0.40024	0.0614122	-6.51728	7.15944e-11	1.4262e-09
COBS05375	321.688	-0.400304	0.0614776	-6.51138	7.4463e-11	1.47654e-09
COBS05515	244.044	-0.40074	0.092939	-4.31186	1.61888e-05	0.000108077
COBS17452	397.882	-0.401148	0.103171	-3.88818	0.000100997	0.000535032
COBS07641	883.17	-0.401459	0.0916255	-4.38152	1.17852e-05	8.13161e-05
COBS15076	511.403	-0.402185	0.0760315	-5.28971	1.22509e-07	1.31572e-06
COBS15369	200.911	-0.402408	0.0921578	-4.36652	1.26244e-05	8.61781e-05
COBS07587	434.501	-0.402633	0.0956252	-4.21054	2.54766e-05	0.000161184
COBS11346	73.5269	-0.403019	0.103357	-3.8993	9.64702e-05	0.000513251
COBS03727	1125.59	-0.403308	0.0643815	-6.26435	3.74389e-10	6.67377e-09
COBS12305	213.498	-0.403965	0.0921952	-4.38162	1.17798e-05	8.13112e-05
COBS03253	6752.85	-0.404808	0.0805028	-5.0285	4.94342e-07	4.68109e-06
COBS08566	306.548	-0.404962	0.0839714	-4.82262	1.41685e-06	1.20803e-05
COBS17172	105.825	-0.405463	0.106395	-3.81093	0.000138444	0.000705203
COBS01347	2568.09	-0.406665	0.0405083	-10.0391	1.02655e-23	1.36538e-21
COBS07911	396.961	-0.406734	0.109533	-3.71336	0.000204525	0.000992825
COBS01377	568.818	-0.407096	0.107456	-3.7885	0.000151558	0.000765358
COBS08713	522.45	-0.407141	0.0744883	-5.46584	4.60722e-08	5.43037e-07
COBS06576	469.046	-0.407295	0.0900198	-4.52451	6.05357e-06	4.48606e-05
COBS11342	101.038	-0.407752	0.0875449	-4.65763	3.19872e-06	2.52784e-05
COBS15951	500.74	-0.408001	0.070954	-5.75022	8.91291e-09	1.20813e-07
COBS17528	715.004	-0.408319	0.0900261	-4.53557	5.74484e-06	4.27795e-05
COBS07179	216.864	-0.408329	0.0990509	-4.12241	3.74924e-05	0.000225725
COBS01807	687.192	-0.409065	0.0709127	-5.76857	7.99489e-09	1.09725e-07
COBS08776	1320.99	-0.409644	0.102116	-4.01156	6.03192e-05	0.000341066
COBS06521	246.072	-0.410038	0.100714	-4.07133	4.67459e-05	0.000273623
COBS17057	326.145	-0.411469	0.0791158	-5.20085	1.98378e-07	2.04786e-06
COBS12609	116.464	-0.411764	0.0851635	-4.83499	1.33155e-06	1.14489e-05
COBS01074	332.244	-0.412702	0.102757	-4.01628	5.91244e-05	0.000335077
COBS16827	104.297	-0.413808	0.107197	-3.86024	0.000113274	0.00059155
COBS07901	317.766	-0.414355	0.0885893	-4.67726	2.90738e-06	2.32319e-05
[truncated: 1,566 more rows]
