# Supplementary material for: Late-life fitness gains and reproductive death in Cardiocondyla obscurior ants
Source: eLife. 2022 Apr 6;11:e74695. doi: 10.7554/eLife.74695 (PMC8986319; doi:10.7554/eLife.74695)
Supplement: Source data 10. — 3565 genes were differentially expressed between middle-aged and prope mortem queens (after false discovery rate [FDR] adjustment p<0.001, DESeq2) out of 20,006 expressed genes. [file elife-74695-data10.xlsx]

## Sheet: Sheet1
	baseMean	log2FoldChange	lfcSE	stat	pvalue	padj	Go Term	KEGG ID
COBS15646	6.99591	3.59534	0.728083	4.93809	7.88916e-07	3.8757e-06
COBS14251	8747.77	3.46459	0.38413	9.01932	1.89264e-19	6.25865e-18
COBS06637	154.381	3.32036	0.260546	12.7439	3.37243e-37	1.25532e-34
COBS19680	122.804	3.20704	0.395603	8.10671	5.20109e-16	1.04288e-14
COBS18612	9.82865	3.16166	0.534272	5.91769	3.26495e-09	2.40108e-08
COBS20955	1.25153	3.11562	0.750211	4.15299	3.28159e-05	0.000120148
COBS01025	3.02825	3.03931	0.578931	5.24986	1.52213e-07	8.37316e-07
COBS16628	4.93596	2.9453	0.437367	6.73415	1.64895e-11	1.73714e-10
COBS12064	81.5308	2.90701	0.236599	12.2867	1.06808e-34	2.7688e-32
COBS03111	80.4267	2.85387	0.371044	7.69147	1.45451e-14	2.4049e-13
COBS01057	2.98666	2.85023	0.503389	5.66209	1.49543e-08	9.71759e-08
COBS10312	1.32348	2.81902	0.591262	4.7678	1.86252e-06	8.5972e-06
COBS16229	5.06309	2.78945	0.592796	4.70558	2.53146e-06	1.13599e-05
COBS09031	1.1492	2.77676	0.671834	4.13311	3.57894e-05	0.000130214
COBS13254	660.52	2.76071	0.159552	17.3029	4.4701e-67	6.48924e-63
COBS12371	11.7449	2.72007	0.331787	8.19824	2.43923e-16	5.08038e-15
COBS09248	73.6637	2.66083	0.363575	7.31851	2.5074e-13	3.49328e-12
COBS14252	202.722	2.64712	0.450875	5.87108	4.32978e-09	3.12093e-08
COBS06835	61.9336	2.64621	0.266107	9.94415	2.67458e-23	1.66639e-21
COBS15935	338.631	2.59251	0.308458	8.40475	4.28769e-17	1.00556e-15
COBS07306	2725.01	2.58186	0.384894	6.70797	1.97347e-11	2.04052e-10
COBS05086	175.214	2.57625	0.300766	8.56564	1.07473e-17	2.79602e-16
COBS19094	6.54665	2.56254	0.45545	5.6264	1.84012e-08	1.18094e-07
COBS20130	1.35085	2.53792	0.634088	4.00248	6.26819e-05	0.000217692
COBS09712	282.641	2.52963	0.192171	13.1634	1.42495e-39	6.67288e-37
COBS00197	1.3429	2.52673	0.617096	4.09454	4.23007e-05	0.000151737
COBS13304	44.09	2.52622	0.220115	11.4768	1.72459e-30	2.78176e-28
COBS05714	4318.27	2.50776	0.358786	6.98959	2.75686e-12	3.27507e-11
COBS04489	2.57922	2.50621	0.523416	4.78817	1.68306e-06	7.82357e-06
COBS20391	79.1476	2.50193	0.5313	4.70906	2.48857e-06	1.11986e-05
COBS06764	11.5842	2.4862	0.423019	5.87727	4.17085e-09	3.01986e-08
COBS15725	489.818	2.4685	0.190779	12.939	2.70968e-38	1.1239e-35
COBS07794	91.9513	2.46377	0.306988	8.02561	1.01021e-15	1.94757e-14
COBS08677	58.372	2.44742	0.19889	12.3054	8.46727e-35	2.27628e-32
COBS20390	23.6693	2.44713	0.681163	3.59258	0.000327415	0.000985707
COBS07111	3455.36	2.44313	0.614075	3.97855	6.9336e-05	0.000238632
COBS18610	31.8545	2.42695	0.363424	6.678	2.42222e-11	2.46415e-10
COBS17484	16.5298	2.42408	0.351417	6.89801	5.27351e-12	5.98091e-11
COBS12063	41.7018	2.41043	0.224759	10.7245	7.80822e-27	7.65892e-25
COBS14435	420.969	2.39105	0.272572	8.77215	1.75293e-18	5.1305e-17
COBS11965	15.678	2.38484	0.295761	8.06341	7.41924e-16	1.45547e-14
COBS15305	52.6567	2.33668	0.367667	6.35543	2.07839e-10	1.84877e-09
COBS10210	10.5612	2.32449	0.256422	9.06507	1.24523e-19	4.27351e-18
COBS04476	4.68333	2.31214	0.499606	4.62793	3.69344e-06	1.60869e-05
COBS10602	91.6195	2.30395	0.175489	13.1288	2.25244e-39	1.02184e-36
COBS11476	103.853	2.30385	0.432527	5.32649	1.00126e-07	5.67785e-07
COBS08976	4.00614	2.29185	0.467395	4.90346	9.41624e-07	4.54894e-06
COBS18611	9.73296	2.28628	0.441053	5.18369	2.1754e-07	1.16748e-06
COBS04993	1.97879	2.28281	0.561088	4.06855	4.73068e-05	0.000168033
COBS12667	915.028	2.27663	0.326644	6.96975	3.17503e-12	3.73819e-11
COBS07282	2.71997	2.25334	0.478153	4.71259	2.44592e-06	1.10237e-05
COBS10856	18.1489	2.25304	0.334561	6.73431	1.64715e-11	1.7365e-10
COBS19072	2.42872	2.25209	0.579658	3.88521	0.000102243	0.000340347
COBS02220	1.56387	2.24268	0.615521	3.64355	0.000268903	0.000823383
COBS13406	77.8902	2.22725	0.227762	9.77884	1.38787e-22	7.80919e-21
COBS06746	21.3376	2.22391	0.272978	8.14683	3.73579e-16	7.60624e-15
COBS10811	2.6654	2.2105	0.422498	5.23198	1.67703e-07	9.1593e-07
COBS04574	195.876	2.20314	0.308492	7.14163	9.22338e-13	1.18282e-11
COBS04477	3.02912	2.20075	0.511679	4.30104	1.69997e-05	6.56515e-05
COBS07457	214.679	2.19441	0.191577	11.4544	2.23473e-30	3.45124e-28
COBS14067	4.17531	2.19209	0.479037	4.57603	4.73885e-06	2.01919e-05
COBS02034	20.3801	2.1883	0.266368	8.21532	2.11607e-16	4.46678e-15
COBS04259	2.13347	2.18475	0.552159	3.95673	7.59817e-05	0.000259658
COBS09207	57.6297	2.18185	0.217889	10.0136	1.32807e-23	8.53077e-22
COBS13404	1317.18	2.17787	0.24378	8.93376	4.11788e-19	1.32255e-17
COBS06837	42.0461	2.17702	0.336699	6.46579	1.00771e-10	9.3237e-10
COBS09251	2.12442	2.17445	0.526362	4.1311	3.61038e-05	0.000131194
COBS15576	2.3807	2.1701	0.529617	4.09748	4.17674e-05	0.000150084
COBS00584	2.87146	2.16665	0.446403	4.85358	1.21252e-06	5.76366e-06
COBS02445	20.3966	2.16567	0.255749	8.46795	2.49748e-17	6.11987e-16
COBS16641	2.47988	2.14416	0.444012	4.82906	1.37177e-06	6.46138e-06
COBS05895	714.789	2.14087	0.16158	13.2495	4.53986e-40	2.35376e-37
COBS05899	1.64857	2.13326	0.574715	3.71186	0.000205743	0.000646068
COBS15969	258.705	2.13103	0.223404	9.53887	1.44396e-21	7.08177e-20
COBS19933	12.0393	2.12904	0.271479	7.84237	4.42114e-15	7.89443e-14
COBS11657	2.67815	2.12247	0.525543	4.03862	5.37662e-05	0.000189172
COBS17129	54.8787	2.12025	0.21625	9.8046	1.07568e-22	6.12377e-21
COBS08263	566.647	2.11467	0.208893	10.1232	4.35988e-24	3.02834e-22
COBS07305	4.79434	2.10892	0.562116	3.75175	0.000175601	0.000559035
COBS00472	6.84193	2.0986	0.322852	6.50019	8.02195e-11	7.55218e-10
COBS14486	4024.55	2.08789	0.222434	9.38656	6.19905e-21	2.71059e-19
COBS08410	2.52387	2.07901	0.404153	5.14411	2.68789e-07	1.42409e-06
COBS13653	56.2953	2.06829	0.319456	6.47443	9.51722e-11	8.85083e-10
COBS04833	129.457	2.06398	0.224822	9.18047	4.29195e-20	1.61861e-18
COBS10678	22.8608	2.06121	0.258067	7.98709	1.38158e-15	2.60473e-14
COBS15127	2.25856	2.0587	0.471188	4.36916	1.24723e-05	4.92816e-05
COBS06548	579.562	2.05368	0.227463	9.02864	1.73816e-19	5.78737e-18
COBS01426	2.68594	2.04686	0.457289	4.47608	7.60276e-06	3.11804e-05
COBS00772	867.248	2.04545	0.239141	8.55331	1.1961e-17	3.09516e-16
COBS00549	2.96329	2.04315	0.501808	4.07158	4.66956e-05	0.000166106
COBS03956	3.54263	2.03996	0.396383	5.14644	2.65482e-07	1.4076e-06
COBS11963	53.8648	2.03593	0.411039	4.95312	7.30318e-07	3.60093e-06
COBS02446	1.82228	2.03533	0.556896	3.65477	0.000257413	0.000791031
COBS12867	318.386	2.03268	0.160338	12.6775	7.88113e-37	2.66071e-34
COBS03929	336.627	2.03121	0.333856	6.08409	1.17151e-09	9.20782e-09
COBS04485	11.7193	2.02958	0.248822	8.15673	3.44213e-16	7.03795e-15
COBS00091	1.23705	2.02172	0.541694	3.73221	0.000189809	0.000600449
COBS02184	2.28393	2.01827	0.552677	3.65181	0.000260398	0.000799704
COBS03181	12.3812	2.00864	0.27193	7.38658	1.50652e-13	2.15469e-12
COBS12294	997.22	1.99683	0.233958	8.53498	1.40175e-17	3.57003e-16
COBS09032	1.94573	1.99484	0.509728	3.91353	9.09555e-05	0.000305931
COBS10399	159.778	1.99154	0.189372	10.5165	7.24805e-26	6.01257e-24
COBS05336	134.727	1.99047	0.252466	7.88411	3.16786e-15	5.72701e-14
COBS11133	108.904	1.98647	0.195713	10.1499	3.31632e-24	2.33704e-22
COBS06402	24.8434	1.96345	0.204567	9.59809	8.14428e-22	4.16305e-20
COBS04474	9.84345	1.95493	0.270717	7.22131	5.14905e-13	6.92118e-12
COBS14223	4.86076	1.95287	0.308394	6.33239	2.41394e-10	2.11486e-09
COBS18851	5.85492	1.95263	0.299257	6.52494	6.80287e-11	6.46494e-10
COBS14156	9.27778	1.94966	0.334028	5.8368	5.32129e-09	3.77378e-08
COBS15650	3.89695	1.94818	0.395233	4.9292	8.25677e-07	4.04125e-06
COBS06938	13.9981	1.94358	0.252893	7.68537	1.52551e-14	2.51372e-13
COBS01162	44.5335	1.94324	0.279997	6.9402	3.91559e-12	4.52929e-11
COBS01542	1664.05	1.94296	0.166921	11.6399	2.58182e-31	4.84859e-29
COBS08509	463.661	1.9389	0.379299	5.11181	3.1909e-07	1.66388e-06
COBS04896	13.5215	1.93704	0.3341	5.79778	6.71986e-09	4.68551e-08
COBS07222	149.268	1.93198	0.254777	7.58302	3.37596e-14	5.29254e-13
COBS08992	7.60509	1.92909	0.256873	7.50989	5.91753e-14	8.95775e-13
COBS17878	44.4488	1.929	0.217397	8.87316	7.1101e-19	2.22451e-17
COBS03590	111.858	1.92326	0.219439	8.76442	1.87743e-18	5.45092e-17
COBS17443	117.794	1.92204	0.196445	9.7841	1.31758e-22	7.44251e-21
COBS05986	10.5589	1.92103	0.286417	6.70712	1.9851e-11	2.04962e-10
COBS15697	128.593	1.91371	0.163378	11.7134	1.08841e-31	2.13519e-29
COBS13589	136.876	1.91368	0.166398	11.5006	1.31031e-30	2.13728e-28
COBS18855	55.9175	1.91043	0.224232	8.51991	1.59678e-17	4.01741e-16
COBS11567	163.463	1.90971	0.215385	8.86646	7.55072e-19	2.34217e-17
COBS09572	1145.8	1.90905	0.180592	10.571	4.05954e-26	3.52888e-24
COBS10610	60.8203	1.90776	0.169256	11.2715	1.81527e-29	2.48606e-27
COBS13866	8.57359	1.90655	0.290529	6.56233	5.29728e-11	5.15765e-10
COBS11906	1492.93	1.90582	0.181087	10.5244	6.6698e-26	5.56469e-24
COBS18123	2.95852	1.90245	0.386981	4.91615	8.82648e-07	4.29116e-06
COBS09959	9.26195	1.89668	0.272278	6.96596	3.2616e-12	3.8308e-11
COBS05903	728.306	1.89527	0.20846	9.09174	9.74642e-20	3.40937e-18
COBS07627	12.4872	1.89313	0.269429	7.02646	2.11843e-12	2.55213e-11
COBS08181	3.61681	1.88561	0.389748	4.83801	1.31145e-06	6.19132e-06
COBS19219	3.2093	1.88001	0.438217	4.29014	1.7856e-05	6.87392e-05
COBS00795	398.168	1.87931	0.171759	10.9416	7.28988e-28	8.26775e-26
COBS19500	5.96648	1.86707	0.412522	4.52598	6.0116e-06	2.51282e-05
COBS05948	57.9255	1.86669	0.229769	8.12419	4.50363e-16	9.0736e-15
COBS03996	12.5524	1.86331	0.40586	4.59101	4.41101e-06	1.89228e-05
COBS03502	8.90783	1.86195	0.293672	6.34023	2.29426e-10	2.02157e-09
COBS05706	28.0778	1.85844	0.170395	10.9067	1.07113e-27	1.18699e-25
COBS11781	64.5602	1.8582	0.18778	9.89561	4.34936e-23	2.57713e-21
COBS02041	694.817	1.85628	0.132794	13.9787	2.1044e-44	1.90935e-41
COBS05107	89.8448	1.85422	0.231891	7.99608	1.28446e-15	2.43745e-14
COBS11009	289.383	1.85204	0.161407	11.4743	1.77585e-30	2.80217e-28
COBS12842	4.21928	1.84624	0.362084	5.09893	3.4158e-07	1.77224e-06
COBS00829	2043.01	1.84529	0.216021	8.54216	1.31737e-17	3.37885e-16
COBS15607	1.84289	1.83999	0.464699	3.95952	7.51003e-05	0.00025713
COBS12006	113.764	1.8387	0.323908	5.67662	1.37385e-08	9.00918e-08
COBS19580	17.6947	1.83435	0.280179	6.54706	5.86792e-11	5.63763e-10
COBS05009	1.35411	1.83425	0.502825	3.64789	0.000264403	0.000810973
COBS18187	32.2338	1.83407	0.260578	7.03845	1.94395e-12	2.35365e-11
COBS13178	7.33289	1.82615	0.244145	7.47977	7.44512e-14	1.11309e-12
COBS16268	1.74539	1.82396	0.422938	4.3126	1.61349e-05	6.25113e-05
COBS08955	167.115	1.82002	0.192151	9.47184	2.74966e-21	1.2835e-19
COBS18623	1023.09	1.81622	0.195772	9.27721	1.7398e-20	6.95778e-19
COBS14021	44.2235	1.8158	0.251636	7.21597	5.35497e-13	7.15821e-12
COBS18457	26.0942	1.81578	0.276485	6.56737	5.12121e-11	5.003e-10
COBS05005	453.398	1.81411	0.147359	12.3108	7.92387e-35	2.17039e-32
COBS19084	7.7735	1.81088	0.371663	4.87238	1.10264e-06	5.27763e-06
COBS04471	16.1307	1.80554	0.240868	7.49601	6.57914e-14	9.89735e-13
COBS14184	25.2168	1.80404	0.225672	7.99408	1.30545e-15	2.47083e-14
COBS15645	1506.52	1.79348	0.267456	6.70572	2.00414e-11	2.06381e-10
COBS17398	735.459	1.79316	0.224679	7.98095	1.45212e-15	2.73062e-14
COBS14298	311.49	1.78717	0.195169	9.15707	5.33245e-20	1.96475e-18
COBS11059	69.7694	1.78187	0.212193	8.39739	4.56497e-17	1.06715e-15
COBS01952	370.261	1.77714	0.207862	8.54958	1.23535e-17	3.18535e-16
COBS18125	4.31561	1.77254	0.483918	3.6629	0.000249375	0.000769595
COBS12665	6.3256	1.76291	0.399486	4.41296	1.01969e-05	4.09369e-05
COBS20421	23.8565	1.75744	0.463318	3.79316	0.000148742	0.000480376
COBS19002	7825.17	1.75265	0.162374	10.7939	3.67928e-27	3.76142e-25
COBS16779	547.602	1.75125	0.108567	16.1306	1.55604e-58	4.51782e-55
COBS20164	8.383	1.74825	0.260734	6.70511	2.01257e-11	2.07063e-10
COBS19541	149.55	1.74746	0.217079	8.04988	8.28775e-16	1.61494e-14
COBS04157	13.0194	1.74194	0.230819	7.54678	4.46141e-14	6.8754e-13
COBS02350	336.847	1.7404	0.244755	7.11077	1.15399e-12	1.45169e-11
COBS12036	93.1467	1.74026	0.19352	8.99267	2.413e-19	7.90735e-18
COBS19439	7.60546	1.73982	0.265911	6.54286	6.0353e-11	5.78313e-10
COBS02333	74.2211	1.73933	0.340199	5.11268	3.17614e-07	1.65677e-06
COBS16964	8.22356	1.73429	0.242621	7.14815	8.79526e-13	1.13393e-11
COBS19986	683.808	1.7306	0.175268	9.87406	5.3937e-23	3.14459e-21
COBS14093	4.15706	1.72985	0.36425	4.74909	2.04335e-06	9.35163e-06
COBS01124	276.883	1.72533	0.137831	12.5178	5.96792e-36	1.73273e-33
COBS18461	1440.19	1.72491	0.365782	4.71569	2.40891e-06	1.08671e-05
COBS08598	462.276	1.72425	0.229613	7.50937	5.94137e-14	8.98447e-13
COBS08775	145.944	1.7197	0.122309	14.0602	6.66531e-45	6.45069e-42
COBS19376	12.0692	1.71821	0.460509	3.7311	0.000190646	0.000602571
COBS06844	3.38484	1.71571	0.443749	3.86639	0.000110458	0.000366184
COBS04498	4.2658	1.71493	0.440647	3.89185	9.94822e-05	0.000331844
COBS17570	35.1211	1.71361	0.401569	4.2673	1.97857e-05	7.53289e-05
COBS14270	326.76	1.71082	0.12646	13.5286	1.06018e-41	6.69157e-39
COBS17604	72.7867	1.7106	0.134891	12.6813	7.50363e-37	2.59358e-34
COBS10426	282.004	1.71053	0.32726	5.22684	1.7243e-07	9.40687e-07
COBS13889	149.599	1.70972	0.172297	9.92313	3.30247e-23	2.01437e-21
COBS13621	4056.46	1.70576	0.234583	7.27147	3.55589e-13	4.86072e-12
COBS04202	10.3965	1.70429	0.327751	5.19995	1.99342e-07	1.07538e-06
COBS15275	226.929	1.70322	0.208179	8.1815	2.80341e-16	5.78084e-15
COBS12007	42.3926	1.70153	0.296611	5.73656	9.66215e-09	6.55446e-08
COBS19930	2.2959	1.69934	0.433512	3.91995	8.8569e-05	0.000298666
COBS00341	12.1165	1.698	0.341192	4.97668	6.46849e-07	3.21256e-06
COBS14923	269.636	1.69667	0.146235	11.6024	4.00863e-31	7.36624e-29
COBS09820	9.19486	1.6954	0.254805	6.65373	2.8576e-11	2.88483e-10
COBS07972	3.75876	1.69492	0.433224	3.91234	9.14076e-05	0.000306999
COBS10484	180.073	1.69272	0.214214	7.902	2.74459e-15	4.99289e-14
COBS04481	6.23921	1.69261	0.332979	5.08323	3.71061e-07	1.91221e-06
COBS12595	1.8571	1.69215	0.441309	3.8344	0.000125873	0.000412484
COBS18211	2.74033	1.69196	0.392849	4.3069	1.65559e-05	6.4074e-05
COBS19088	8.71364	1.69037	0.327866	5.15567	2.52729e-07	1.34391e-06
COBS13112	16.4621	1.69007	0.314051	5.3815	7.38659e-08	4.26705e-07
COBS01110	5.0768	1.68977	0.323715	5.21993	1.78989e-07	9.72814e-07
COBS05215	4.49509	1.68916	0.462032	3.65594	0.000256239	0.00078793
COBS02047	5.13737	1.68672	0.403918	4.17589	2.96824e-05	0.000109532
COBS00828	142.058	1.68537	0.452034	3.72842	0.000192683	0.000608347
COBS00271	3.58435	1.68485	0.393262	4.2843	1.83313e-05	7.02523e-05
COBS18655	15.739	1.68397	0.221208	7.61262	2.68585e-14	4.30358e-13
COBS01261	24.4117	1.68125	0.291941	5.75887	8.46809e-09	5.8096e-08
COBS01505	28.4351	1.67274	0.173782	9.6255	6.24034e-22	3.25867e-20
COBS15826	3.62958	1.67217	0.357665	4.67524	2.93604e-06	1.30344e-05
COBS12193	8.44328	1.67112	0.201821	8.28021	1.22959e-16	2.72517e-15
COBS14368	52.5493	1.67094	0.177757	9.40013	5.44948e-21	2.40456e-19
COBS11701	108.743	1.67079	0.156781	10.6569	1.61964e-26	1.48259e-24
COBS03558	3.71594	1.6693	0.423704	3.93977	8.15592e-05	0.000277152
COBS05919	15.9119	1.6619	0.218444	7.60791	2.78556e-14	4.43399e-13
COBS02992	74.2965	1.66174	0.201213	8.2586	1.47388e-16	3.23207e-15
COBS13796	359.64	1.66165	0.120006	13.8464	1.3378e-43	9.71039e-41
COBS02396	6234.12	1.66113	0.427204	3.88837	0.00010092	0.000336409
COBS10635	184.944	1.65687	0.138159	11.9925	3.89191e-33	9.11272e-31
COBS12588	127.496	1.65613	0.14362	11.5314	9.16713e-31	1.52965e-28
COBS19891	28.8051	1.65331	0.249918	6.61543	3.70467e-11	3.70136e-10
COBS15344	128.844	1.64876	0.13819	11.9311	8.15174e-33	1.84904e-30
COBS17933	5.50041	1.64601	0.416927	3.94795	7.88223e-05	0.000268572
COBS17073	132.738	1.63537	0.146326	11.1762	5.33061e-29	7.03495e-27
COBS03045	7.7209	1.6346	0.294722	5.54623	2.91888e-08	1.81083e-07
COBS12925	6.77683	1.63364	0.293011	5.57536	2.47023e-08	1.54971e-07
COBS11149	116.375	1.62494	0.17382	9.3484	8.89798e-21	3.71184e-19
COBS19382	1094.45	1.62476	0.177923	9.1318	6.73682e-20	2.44496e-18
COBS19276	26.9801	1.62428	0.440011	3.69144	0.000222987	0.000696301
COBS05354	8.19245	1.62325	0.30136	5.38642	7.18743e-08	4.16194e-07
COBS10630	27.0932	1.6232	0.157917	10.2788	8.77848e-25	6.61829e-23
COBS15323	255.86	1.61981	0.107998	14.9985	7.51382e-51	1.55826e-47
COBS15322	67.0864	1.6179	0.169025	9.57196	1.04894e-21	5.28734e-20
COBS00303	47.9704	1.61726	0.326961	4.94635	7.56177e-07	3.72116e-06
COBS14735	2.42727	1.61507	0.42616	3.78982	0.000150756	0.000485907
COBS14048	26.1155	1.61358	0.298661	5.4027	6.56466e-08	3.82727e-07
COBS15872	872.773	1.61131	0.134189	12.0077	3.23679e-33	7.70303e-31
COBS14367	21.0195	1.60974	0.296254	5.43366	5.52093e-08	3.262e-07
COBS12119	65.7857	1.60794	0.166189	9.67539	3.83634e-22	2.05506e-20
COBS05202	4.48047	1.60748	0.307738	5.22352	1.75551e-07	9.55916e-07
COBS10075	15.2597	1.60708	0.196208	8.19073	2.59649e-16	5.38475e-15
COBS15679	130.281	1.60514	0.163519	9.81624	9.5851e-23	5.47823e-21
COBS04483	15.4521	1.60298	0.333975	4.79972	1.58891e-06	7.40249e-06
COBS19048	15.0998	1.60215	0.273671	5.85431	4.79007e-09	3.42212e-08
COBS03591	51.6969	1.59934	0.229339	6.97367	3.08768e-12	3.64422e-11
COBS01054	817.413	1.59821	0.132767	12.0377	2.25219e-33	5.44918e-31
COBS00288	23.7282	1.59796	0.205259	7.7851	6.96571e-15	1.20096e-13
COBS06143	8.81687	1.59733	0.28731	5.55961	2.70378e-08	1.68332e-07
COBS05264	34.7169	1.59408	0.278476	5.7243	1.0386e-08	6.98029e-08
COBS04499	5.13224	1.59354	0.36377	4.38063	1.18338e-05	4.6989e-05
COBS07673	123.314	1.59079	0.114183	13.932	4.05048e-44	3.45887e-41
COBS04478	4.66115	1.58832	0.43576	3.64494	0.000267449	0.000819279
COBS18209	17.084	1.58788	0.231863	6.84837	7.46983e-12	8.28415e-11
COBS14372	2.47003	1.5859	0.438415	3.61736	0.000297627	0.000903901
COBS04355	16.5299	1.58205	0.279404	5.66225	1.49398e-08	9.71255e-08
COBS14310	43.8332	1.58089	0.136477	11.5835	4.99411e-31	8.8414e-29
COBS10501	8.13674	1.5768	0.333612	4.72646	2.28469e-06	1.03776e-05
COBS19208	26.8483	1.57489	0.195035	8.0749	6.7533e-16	1.33748e-14
COBS18129	14.6024	1.57392	0.287613	5.47234	4.4414e-08	2.66099e-07
COBS17236	19.4257	1.57347	0.2495	6.30649	2.85427e-10	2.47228e-09
COBS08363	1.8435	1.56718	0.424565	3.69126	0.000223144	0.000696641
COBS10935	3.2816	1.56322	0.378637	4.12854	3.65069e-05	0.000132493
COBS20283	4.9229	1.56321	0.409342	3.81882	0.00013409	0.000437041
COBS05867	266.574	1.56034	0.176373	8.84684	9.0034e-19	2.74585e-17
COBS10884	29.5489	1.55622	0.218495	7.12245	1.06025e-12	1.34425e-11
COBS19409	187.08	1.55456	0.177443	8.7609	1.93703e-18	5.60158e-17
COBS09131	105.172	1.55371	0.130693	11.8882	1.36292e-32	3.04393e-30
COBS10527	96.6048	1.54972	0.211234	7.33652	2.19215e-13	3.07473e-12
COBS17366	156.039	1.54932	0.304745	5.084	3.69571e-07	1.90656e-06
COBS14366	65.3952	1.54623	0.238164	6.49229	8.45408e-11	7.92304e-10
COBS04490	4.41052	1.54548	0.36372	4.24909	2.14644e-05	8.12091e-05
COBS05902	228.247	1.5399	0.245012	6.28501	3.27827e-10	2.81102e-09
COBS06834	64.5226	1.53958	0.208976	7.36725	1.74188e-13	2.47667e-12
COBS15153	357.184	1.53884	0.178334	8.62893	6.19274e-18	1.6679e-16
COBS19501	453.056	1.53558	0.162953	9.42342	4.36647e-21	1.96248e-19
COBS19551	113.395	1.53459	0.164763	9.31395	1.23167e-20	5.0348e-19
COBS14189	6.22812	1.53322	0.361022	4.24688	2.16766e-05	8.1969e-05
COBS08154	5.34044	1.52988	0.365814	4.18212	2.88803e-05	0.000106817
COBS05287	118.294	1.52842	0.202976	7.53008	5.0709e-14	7.76521e-13
COBS09418	5.73623	1.52814	0.273697	5.58334	2.35944e-08	1.48599e-07
COBS07474	3.37952	1.52693	0.402215	3.79631	0.000146865	0.00047516
COBS06972	116.553	1.5266	0.119548	12.7698	2.4193e-37	9.49214e-35
COBS01840	5.60677	1.52604	0.424056	3.59867	0.000319847	0.000965127
COBS06137	191.713	1.5258	0.177301	8.60573	7.5835e-18	2.02743e-16
COBS19317	37.4126	1.52425	0.244378	6.23726	4.45306e-10	3.74754e-09
COBS02044	198.459	1.52394	0.117677	12.9502	2.34473e-38	1.00113e-35
COBS06145	352.074	1.52278	0.214532	7.09815	1.26435e-12	1.58229e-11
COBS03837	302.6	1.51586	0.159852	9.48289	2.47343e-21	1.16581e-19
COBS09099	2.96857	1.51381	0.402859	3.75766	0.000171508	0.000547206
COBS16067	3.07662	1.51363	0.330484	4.58004	4.64896e-06	1.98497e-05
COBS04799	152.72	1.51056	0.16548	9.12835	6.955e-20	2.50535e-18
COBS05748	40.6279	1.50959	0.23337	6.46865	9.88852e-11	9.16092e-10
COBS13800	80.5302	1.50438	0.194246	7.74472	9.57899e-15	1.62832e-13
COBS17677	164.319	1.50231	0.103275	14.5468	6.12145e-48	9.32402e-45
COBS14500	21.7211	1.50196	0.19583	7.66969	1.72414e-14	2.83779e-13
COBS12461	32.7065	1.49975	0.184076	8.14745	3.71688e-16	7.57836e-15
COBS10314	5.87046	1.49726	0.381808	3.9215	8.80004e-05	0.000296886
COBS03928	56.9825	1.49564	0.251094	5.95647	2.57739e-09	1.9237e-08
COBS12284	142.625	1.49421	0.176457	8.46784	2.49989e-17	6.11987e-16
COBS11773	15.8904	1.49262	0.325211	4.58969	4.43905e-06	1.90374e-05
COBS10238	561.428	1.49095	0.17415	8.56131	1.11593e-17	2.89803e-16
COBS09084	469.732	1.48882	0.146907	10.1345	3.88502e-24	2.72458e-22
COBS12857	224.602	1.48536	0.108333	13.7111	8.71826e-43	5.75286e-40
COBS04472	14.6749	1.4848	0.29112	5.1003	3.39121e-07	1.76113e-06
COBS13770	227.851	1.48149	0.112283	13.1943	9.45941e-40	4.73525e-37
COBS04583	3.24621	1.47798	0.403371	3.66407	0.000248234	0.000766727
COBS01417	5.22444	1.4765	0.385087	3.83419	0.00012598	0.00041274
COBS08627	278.901	1.47552	0.245675	6.006	1.90157e-09	1.44302e-08
COBS19513	6.02049	1.47528	0.338177	4.36245	1.28612e-05	5.07215e-05
COBS08606	96.1658	1.47428	0.18264	8.07209	6.91053e-16	1.36305e-14
COBS04964	533.527	1.47155	0.124526	11.8172	3.18166e-32	6.59831e-30
COBS06139	1087.06	1.47108	0.158583	9.27637	1.75346e-20	6.99314e-19
COBS18591	18.0295	1.47075	0.290823	5.05719	4.25476e-07	2.17713e-06
COBS09218	1595.6	1.46811	0.10155	14.457	2.26471e-47	2.9888e-44
COBS14123	74.8362	1.46752	0.190337	7.71013	1.25687e-14	2.1045e-13
COBS19238	5.38266	1.46743	0.325357	4.51021	6.47638e-06	2.69083e-05
COBS10925	32.1133	1.46704	0.193153	7.5952	3.07328e-14	4.85471e-13
COBS05549	2.27283	1.46687	0.393987	3.72315	0.000196756	0.000619858
COBS10924	60.8535	1.46681	0.314079	4.67019	3.00915e-06	1.33345e-05
COBS01781	121.264	1.46534	0.245586	5.96672	2.42069e-09	1.81327e-08
COBS18924	232.108	1.46421	0.160053	9.14829	5.7844e-20	2.12051e-18
COBS17247	273.369	1.46417	0.143296	10.2178	1.64989e-24	1.18571e-22
COBS19089	10.3573	1.4635	0.367633	3.98088	6.86598e-05	0.000236585
COBS01193	1175.72	1.46329	0.217235	6.73599	1.62819e-11	1.71902e-10
COBS03930	21.2191	1.46241	0.21175	6.9063	4.97455e-12	5.66841e-11
COBS15592	574.102	1.46144	0.39801	3.67186	0.000240789	0.000745953
COBS17704	721.341	1.46118	0.126564	11.545	7.82812e-31	1.32141e-28
COBS03369	17.2946	1.46015	0.252433	5.78429	7.28213e-09	5.06054e-08
COBS03721	31.7627	1.45696	0.154898	9.40593	5.1573e-21	2.28956e-19
COBS10679	10.872	1.45657	0.243321	5.9862	2.14803e-09	1.62158e-08
COBS14314	46.784	1.45246	0.166195	8.7395	2.34142e-18	6.67787e-17
COBS14363	24.1144	1.45162	0.250969	5.78408	7.29118e-09	5.06425e-08
COBS10772	487.968	1.45148	0.0883174	16.4348	1.07823e-60	5.21755e-57
COBS11204	6.42189	1.45095	0.308282	4.70656	2.51931e-06	1.13123e-05
COBS01537	262.519	1.4502	0.316576	4.5809	4.62969e-06	1.97791e-05
COBS04326	4.64738	1.45011	0.33952	4.27105	1.94558e-05	7.42092e-05
COBS02735	16.3381	1.44947	0.28226	5.13524	2.81791e-07	1.48755e-06
COBS18008	28.3911	1.44913	0.176101	8.22896	1.88847e-16	4.01391e-15
COBS09466	19.3152	1.44816	0.247182	5.85869	4.66525e-09	3.34175e-08
COBS01055	374.518	1.44747	0.157571	9.18612	4.07262e-20	1.5477e-18
COBS13951	3.23185	1.44714	0.395746	3.65675	0.000255437	0.000786131
COBS14534	10.7824	1.44598	0.395361	3.65738	0.000254811	0.000784369
COBS19270	3.56021	1.44158	0.391261	3.68445	0.000229196	0.000713998
COBS05438	1196.26	1.44108	0.113863	12.6563	1.03279e-36	3.40627e-34
COBS09881	55.0818	1.43878	0.130275	11.0442	2.33966e-28	2.86529e-26
COBS18539	268.087	1.43809	0.159149	9.03609	1.62376e-19	5.43137e-18
COBS13302	29.1326	1.43731	0.301904	4.76081	1.92818e-06	8.86925e-06
COBS18654	7.5565	1.43595	0.371409	3.86621	0.000110541	0.000366375
COBS01036	4.11734	1.43331	0.355212	4.03507	5.45851e-05	0.000191681
COBS14518	25.1629	1.42974	0.185491	7.70788	1.27922e-14	2.13699e-13
COBS07073	6.79011	1.42903	0.302903	4.71776	2.38454e-06	1.07805e-05
COBS07746	61.331	1.42736	0.187997	7.59244	3.13934e-14	4.95368e-13
COBS11739	11.7424	1.42478	0.356465	3.99697	6.41593e-05	0.000222504
COBS15180	346.226	1.42477	0.177929	8.00749	1.1707e-15	2.2421e-14
COBS01506	93.5221	1.42234	0.197213	7.21217	5.50652e-13	7.32705e-12
COBS17872	90.0089	1.42207	0.143322	9.92223	3.33229e-23	2.02405e-21
COBS14365	51.0324	1.42101	0.192168	7.39463	1.41803e-13	2.04221e-12
COBS19283	133.684	1.42029	0.219785	6.46216	1.03221e-10	9.53828e-10
COBS02297	8.86245	1.41715	0.30299	4.67719	2.90826e-06	1.29208e-05
COBS18138	1182.5	1.41682	0.175145	8.08939	5.99658e-16	1.19413e-14
COBS02298	4.17953	1.40831	0.384542	3.66229	0.000249969	0.000771102
COBS05266	189.147	1.40778	0.312572	4.50386	6.67311e-06	2.76544e-05
COBS11515	131.933	1.4067	0.179917	7.8186	5.34129e-15	9.42157e-14
COBS12544	7.05928	1.40641	0.301747	4.6609	3.14835e-06	1.38843e-05
COBS14025	276.23	1.40469	0.158721	8.85006	8.74714e-19	2.67331e-17
COBS07793	366.806	1.40458	0.296617	4.73532	2.18709e-06	9.94804e-06
COBS05252	628.48	1.40358	0.296225	4.73821	2.15613e-06	9.82438e-06
COBS14364	25.6994	1.40346	0.215341	6.51736	7.15551e-11	6.77161e-10
COBS12620	64.1103	1.40026	0.1547	9.05146	1.41075e-19	4.81878e-18
COBS13599	3.70516	1.39874	0.321453	4.3513	1.35334e-05	5.31559e-05
COBS07843	4948.04	1.39819	0.15813	8.84204	9.39895e-19	2.86047e-17
COBS11835	81.235	1.39785	0.166479	8.39652	4.59888e-17	1.07334e-15
COBS15692	218.647	1.39727	0.124502	11.2228	3.14997e-29	4.27366e-27
COBS14296	296.02	1.39569	0.157633	8.85404	8.44053e-19	2.59051e-17
COBS13964	6.6009	1.39509	0.297709	4.68607	2.78504e-06	1.24096e-05
COBS17886	18.9836	1.39489	0.216573	6.44075	1.18882e-10	1.08816e-09
COBS18333	13.519	1.39423	0.238738	5.83999	5.22043e-09	3.70949e-08
COBS13062	177.617	1.39297	0.197576	7.05033	1.78496e-12	2.16839e-11
COBS07398	107.952	1.3911	0.13299	10.4602	1.31532e-25	1.07879e-23
COBS01150	1400.07	1.3899	0.107697	12.9056	4.1846e-38	1.68744e-35
COBS12580	4.82276	1.38967	0.361862	3.84035	0.00012286	0.000403612
COBS08214	10.4194	1.38879	0.211054	6.58026	4.69626e-11	4.61894e-10
COBS10237	259.468	1.38801	0.21818	6.36179	1.99419e-10	1.77714e-09
COBS09234	65.4247	1.38651	0.219985	6.30275	2.92404e-10	2.52668e-09
COBS00122	324.283	1.38309	0.12631	10.9499	6.64875e-28	7.59999e-26
COBS03833	109.916	1.37999	0.133712	10.3206	5.68684e-25	4.41475e-23
COBS16400	9.20055	1.37931	0.219915	6.272	3.56428e-10	3.04011e-09
COBS09250	16.7257	1.37565	0.247324	5.56217	2.66447e-08	1.66151e-07
COBS14970	3.63022	1.37351	0.351001	3.91313	9.11084e-05	0.000306375
COBS18062	72.9175	1.37337	0.146375	9.38256	6.43892e-21	2.79026e-19
COBS16602	12.5208	1.3732	0.206012	6.66563	2.63534e-11	2.67347e-10
COBS15301	2.89775	1.37146	0.348689	3.93318	8.383e-05	0.000284137
COBS12410	664.771	1.37136	0.0938095	14.6186	2.13807e-48	3.8798e-45
COBS00237	35.4602	1.37091	0.196258	6.98525	2.84356e-12	3.3753e-11
COBS10626	22.0201	1.37024	0.301394	4.54634	5.45872e-06	2.2996e-05
COBS11243	108.833	1.37011	0.176573	7.75943	8.53123e-15	1.46047e-13
COBS01517	5.37557	1.36832	0.326179	4.195	2.72868e-05	0.00010131
COBS03823	36.1711	1.36817	0.158407	8.6371	5.76586e-18	1.55582e-16
COBS05152	25.1062	1.36768	0.238938	5.72401	1.04037e-08	6.98566e-08
COBS06747	87.3448	1.36484	0.180171	7.57524	3.5846e-14	5.59544e-13
COBS19985	2144.37	1.36392	0.209234	6.51864	7.0948e-11	6.71854e-10
COBS19567	8.99366	1.36285	0.309067	4.40958	1.03569e-05	4.15106e-05
COBS08173	542.76	1.36248	0.14332	9.50657	1.97058e-21	9.4725e-20
COBS16049	12.4073	1.36168	0.204188	6.66879	2.57923e-11	2.61837e-10
COBS02863	6.83834	1.35965	0.316373	4.29762	1.72644e-05	6.66029e-05
COBS13888	111.422	1.35918	0.128942	10.541	5.59138e-26	4.71919e-24
COBS12474	5.21196	1.358	0.290876	4.66864	3.03198e-06	1.34275e-05
COBS19115	13.8659	1.35546	0.29821	4.54533	5.48504e-06	2.30868e-05
COBS13115	54.7825	1.35504	0.186307	7.27314	3.51219e-13	4.8109e-12
COBS16409	67.6781	1.35489	0.1576	8.59704	8.18015e-18	2.16699e-16
COBS15573	3.20759	1.35484	0.34867	3.88572	0.000102027	0.000339709
COBS14676	1998.04	1.35459	0.269074	5.03428	4.79651e-07	2.42701e-06
COBS11028	2.8422	1.35451	0.363678	3.72447	0.000195728	0.000617156
COBS16092	13.8669	1.3526	0.244968	5.52154	3.36033e-08	2.06004e-07
COBS14965	50.1379	1.35175	0.175111	7.7194	1.16878e-14	1.97063e-13
COBS16900	6.92853	1.34958	0.294287	4.58594	4.51955e-06	1.93655e-05
COBS09661	5.88813	1.34882	0.279095	4.83284	1.34601e-06	6.34623e-06
COBS03242	115.131	1.34852	0.149101	9.0443	1.50628e-19	5.06173e-18
COBS11979	26.2743	1.3478	0.149957	8.9879	2.51988e-19	8.23898e-18
COBS11966	3.20944	1.34755	0.36555	3.68636	0.000227485	0.000709126
COBS02387	204.048	1.34712	0.23532	5.72463	1.03661e-08	6.97334e-08
COBS02301	3.0942	1.34678	0.365595	3.68381	0.000229778	0.000715457
COBS14381	103.938	1.3451	0.152503	8.82011	1.14347e-18	3.4156e-17
COBS09578	9.94711	1.34383	0.204651	6.56648	5.15191e-11	5.02961e-10
COBS14054	24.1868	1.34335	0.193167	6.95434	3.54225e-12	4.12703e-11
COBS02455	255.459	1.34081	0.125857	10.6535	1.67963e-26	1.51448e-24
COBS18558	44.4233	1.34004	0.177855	7.53448	4.90292e-14	7.52386e-13
COBS16694	3.54924	1.33865	0.322062	4.15649	3.23181e-05	0.000118505
COBS17544	6.62856	1.33836	0.303227	4.4137	1.01617e-05	4.08183e-05
COBS12613	4899.27	1.33777	0.129032	10.3677	3.4779e-25	2.75895e-23
COBS18703	40.2568	1.33743	0.199741	6.69582	2.14459e-11	2.1971e-10
COBS05061	258.883	1.33674	0.180462	7.4073	1.28896e-13	1.87118e-12
COBS09305	30.0865	1.33546	0.232207	5.75117	8.86297e-09	6.05476e-08
COBS19074	58.9868	1.33538	0.166451	8.02269	1.03456e-15	1.98924e-14
COBS10367	1682.77	1.33474	0.147078	9.07503	1.13643e-19	3.92798e-18
COBS05901	1255.24	1.33311	0.236743	5.63103	1.79134e-08	1.15321e-07
COBS02914	5.48847	1.33308	0.251919	5.29169	1.21189e-07	6.76656e-07
COBS11703	393.888	1.32933	0.237917	5.58737	2.30535e-08	1.45571e-07
COBS18188	16.5109	1.32841	0.209058	6.35428	2.09398e-10	1.86036e-09
COBS16784	527.247	1.32498	0.209936	6.31135	2.76618e-10	2.40172e-09
COBS19799	14.3503	1.32419	0.234737	5.64116	1.68909e-08	1.08932e-07
COBS14523	7.041	1.32294	0.273964	4.82888	1.373e-06	6.46509e-06
COBS07800	181.695	1.32205	0.319131	4.14266	3.43299e-05	0.000125312
COBS08341	98.5929	1.3214	0.116726	11.3206	1.03772e-29	1.48805e-27
COBS06581	1624.15	1.31975	0.103542	12.7461	3.27777e-37	1.2522e-34
COBS01430	21.7212	1.31838	0.263285	5.00741	5.51679e-07	2.76354e-06
COBS14307	76.3481	1.31615	0.229508	5.73464	9.77174e-09	6.61952e-08
COBS16851	25.624	1.31317	0.307946	4.26427	2.00558e-05	7.63173e-05
COBS13766	48.2987	1.31142	0.158916	8.25226	1.55425e-16	3.38784e-15
COBS00328	135.794	1.31036	0.175746	7.456	8.91905e-14	1.31583e-12
COBS04212	210.237	1.31025	0.158676	8.25743	1.48844e-16	3.25907e-15
COBS05735	545.445	1.30962	0.176993	7.39926	1.36948e-13	1.97621e-12
COBS02739	253.294	1.30763	0.153329	8.5283	1.48517e-17	3.7496e-16
COBS12008	107.725	1.30749	0.251534	5.19807	2.0137e-07	1.08511e-06
COBS01001	59.5661	1.30658	0.152449	8.57063	1.02918e-17	2.6873e-16
COBS08642	6.90818	1.30643	0.328835	3.9729	7.10017e-05	0.000244076
COBS03117	159.155	1.30444	0.183812	7.09661	1.27855e-12	1.59731e-11
COBS01942	108.975	1.30408	0.131904	9.8866	4.75895e-23	2.78571e-21
COBS14672	14.1326	1.30191	0.190353	6.83947	7.94871e-12	8.77501e-11
COBS06253	9.58421	1.30155	0.222163	5.85853	4.6697e-09	3.3427e-08
COBS08511	344.514	1.30044	0.237904	5.46622	4.59741e-08	2.74766e-07
COBS14105	71.3763	1.298	0.169657	7.65073	1.99842e-14	3.25235e-13
COBS09399	7.0848	1.29718	0.304448	4.26077	2.03721e-05	7.74194e-05
COBS16523	144.138	1.29637	0.178745	7.2526	4.08853e-13	5.56784e-12
COBS11978	654.868	1.29584	0.148243	8.74131	2.30418e-18	6.58459e-17
COBS18338	40.362	1.29505	0.199582	6.4888	8.65215e-11	8.09821e-10
COBS18462	75.6099	1.2946	0.309662	4.18069	2.90632e-05	0.000107438
COBS17600	233.55	1.29388	0.126052	10.2647	1.01653e-24	7.52909e-23
COBS14511	22.6447	1.29375	0.206612	6.26173	3.80737e-10	3.2266e-09
COBS09244	33.8346	1.29291	0.197837	6.53526	6.34989e-11	6.06058e-10
COBS00327	46.9563	1.29183	0.218053	5.92437	3.13501e-09	2.31255e-08
COBS07625	9.30261	1.29169	0.247506	5.2188	1.8009e-07	9.78063e-07
COBS16821	7.91984	1.29088	0.334819	3.85545	0.000115516	0.000381557
COBS20277	488.513	1.29073	0.156653	8.23945	1.72997e-16	3.71509e-15
COBS06856	11.9421	1.28978	0.250816	5.14234	2.71343e-07	1.43605e-06
COBS09955	23.5372	1.28847	0.224974	5.72719	1.02105e-08	6.87506e-08
COBS15465	6.62943	1.28836	0.249672	5.1602	2.46688e-07	1.31323e-06
COBS12426	10.8398	1.2881	0.192747	6.68284	2.34352e-11	2.39247e-10
COBS15570	23.1684	1.28738	0.221855	5.80277	6.52273e-09	4.55462e-08
COBS14508	7.25027	1.28719	0.265488	4.84841	1.24455e-06	5.90043e-06
COBS02142	130.366	1.28694	0.223186	5.76624	8.10586e-09	5.5822e-08
COBS17485	14.8376	1.28659	0.31287	4.11223	3.91853e-05	0.000141365
COBS08255	124.814	1.28649	0.170212	7.55818	4.08751e-14	6.32605e-13
COBS18271	3.13661	1.28641	0.349538	3.68031	0.000232947	0.000724011
COBS11383	122.558	1.28555	0.230005	5.58925	2.28052e-08	1.44066e-07
COBS07823	524.065	1.28382	0.0812026	15.8101	2.64941e-56	6.41025e-53
COBS14090	15.4814	1.28265	0.268364	4.7795	1.75732e-06	8.14787e-06
COBS19696	72.18	1.28192	0.155532	8.24214	1.69154e-16	3.64876e-15
COBS18293	136.8	1.28085	0.221482	5.78311	7.33309e-09	5.08864e-08
COBS10629	79.2401	1.28009	0.129197	9.90801	3.84228e-23	2.2954e-21
COBS15809	7.8952	1.27934	0.283394	4.51436	6.35093e-06	2.64173e-05
COBS01834	429.553	1.27805	0.137222	9.31369	1.23468e-20	5.0348e-19
COBS06382	502.189	1.27688	0.151328	8.43783	3.23279e-17	7.79574e-16
COBS11677	682.517	1.27672	0.110921	11.5102	1.17208e-30	1.93354e-28
COBS02001	116.333	1.27621	0.133335	9.57147	1.05401e-21	5.29447e-20
COBS07597	254.94	1.27611	0.124763	10.2283	1.48161e-24	1.07171e-22
COBS20282	10.0515	1.27433	0.352019	3.62004	0.000294555	0.000894759
COBS12711	138.913	1.27382	0.317813	4.00809	6.12117e-05	0.000212841
COBS11254	7.98282	1.27229	0.260037	4.89271	9.94553e-07	4.79188e-06
COBS19050	46.9208	1.27172	0.139844	9.09383	9.56097e-20	3.35257e-18
COBS07104	115.133	1.27109	0.154928	8.2044	2.31753e-16	4.8408e-15
COBS10086	4.06588	1.27109	0.315723	4.02597	5.67418e-05	0.000198772
COBS07981	23.0728	1.26743	0.224427	5.64742	1.62877e-08	1.05322e-07
COBS18960	103.022	1.26706	0.167501	7.56454	3.89234e-14	6.04332e-13
COBS13470	106.907	1.26531	0.122136	10.3599	3.77532e-25	2.9786e-23
COBS07189	5.35982	1.2652	0.294093	4.30205	1.69222e-05	6.53696e-05
COBS16846	68.2968	1.26519	0.119909	10.5513	5.01031e-26	4.27851e-24
COBS03413	268.666	1.2648	0.179553	7.04418	1.8655e-12	2.26245e-11
COBS05293	12.8668	1.26474	0.229819	5.50318	3.73007e-08	2.27614e-07
COBS15256	168.914	1.26415	0.18151	6.96462	3.29291e-12	3.8582e-11
COBS09579	4.32125	1.26383	0.338729	3.7311	0.000190645	0.000602571
COBS14362	15.9867	1.26357	0.241506	5.23203	1.67655e-07	9.1593e-07
COBS13514	316.96	1.26046	0.148281	8.50043	1.88894e-17	4.70357e-16
COBS15588	58.289	1.26039	0.148856	8.46715	2.51468e-17	6.14573e-16
COBS11491	1450.67	1.25987	0.270928	4.6502	3.31618e-06	1.45705e-05
COBS16168	28.5384	1.25868	0.164623	7.64583	2.0761e-14	3.3637e-13
COBS16630	18.5676	1.25842	0.226637	5.55258	2.8149e-08	1.74856e-07
COBS14216	111.999	1.25817	0.15532	8.10046	5.47495e-16	1.09476e-14
COBS19301	1039.07	1.25781	0.141431	8.89343	5.92536e-19	1.86997e-17
COBS19090	21.6626	1.25691	0.246235	5.10451	3.31655e-07	1.72567e-06
COBS11803	29.8294	1.25663	0.190363	6.60127	4.07649e-11	4.05054e-10
COBS06217	85.8794	1.25585	0.205409	6.11388	9.72376e-10	7.73903e-09
COBS11562	19.1928	1.25583	0.215059	5.83948	5.23653e-09	3.71912e-08
COBS12005	91.8012	1.25518	0.319793	3.92498	8.6737e-05	0.000292964
COBS08669	13.7473	1.25448	0.224439	5.58943	2.27815e-08	1.43978e-07
COBS06138	20.4709	1.25437	0.216869	5.784	7.29445e-09	5.06425e-08
COBS12976	487.744	1.25418	0.226601	5.53478	3.11624e-08	1.92095e-07
COBS03830	77.0136	1.25377	0.200711	6.24663	4.19405e-10	3.53777e-09
COBS10883	36.9718	1.2534	0.152107	8.24026	1.71832e-16	3.69553e-15
COBS04748	5.62228	1.25329	0.348371	3.59757	0.000321202	0.000968812
COBS06921	146.143	1.25125	0.125454	9.97375	1.98579e-23	1.26437e-21
COBS13846	230.418	1.25063	0.132663	9.42713	4.21454e-21	1.90008e-19
COBS17445	232.114	1.24983	0.110409	11.3199	1.04554e-29	1.48805e-27
COBS01087	71.5809	1.24837	0.174487	7.15452	8.39652e-13	1.08832e-11
COBS11506	34.0306	1.24753	0.166765	7.48074	7.39053e-14	1.10607e-12
COBS09569	282.032	1.24578	0.155591	8.00676	1.17771e-15	2.25254e-14
COBS13584	53.5072	1.24369	0.121002	10.2782	8.83514e-25	6.61829e-23
COBS11426	72.208	1.24319	0.125167	9.93226	3.01358e-23	1.84591e-21
COBS03848	372.672	1.24285	0.198673	6.25578	3.95534e-10	3.34809e-09
COBS01896	1405.99	1.24205	0.156829	7.91975	2.37982e-15	4.38982e-14
COBS18128	17.4642	1.24175	0.263002	4.72145	2.34172e-06	1.06002e-05
COBS09228	12.3239	1.24042	0.250125	4.95918	7.07922e-07	3.49792e-06
COBS19273	298.036	1.23923	0.134184	9.23534	2.57456e-20	1.0047e-18
COBS17447	21.9134	1.23861	0.244492	5.06607	4.06109e-07	2.08247e-06
COBS06079	3963.34	1.23784	0.140777	8.79294	1.45697e-18	4.29895e-17
COBS17495	29.8057	1.23675	0.171724	7.20194	5.93632e-13	7.84145e-12
COBS08574	33.8931	1.23438	0.233102	5.29547	1.18709e-07	6.64855e-07
COBS08813	13.2651	1.23318	0.207395	5.94604	2.74701e-09	2.04399e-08
COBS02133	10.7696	1.23245	0.278951	4.41815	9.95486e-06	4.00096e-05
COBS02938	159.502	1.23096	0.109136	11.2792	1.66332e-29	2.29965e-27
COBS09439	101.861	1.23036	0.202603	6.07275	1.25738e-09	9.82418e-09
COBS11345	83.0055	1.22999	0.249168	4.93638	7.95878e-07	3.90594e-06
COBS19153	13.9182	1.22678	0.198418	6.18279	6.29779e-10	5.16526e-09
COBS06829	26.2324	1.22593	0.232668	5.26901	1.37162e-07	7.59121e-07
COBS00079	111.127	1.22558	0.234008	5.23733	1.62916e-07	8.92473e-07
COBS18145	38.7722	1.22491	0.221532	5.52928	3.21552e-08	1.97712e-07
COBS02485	32.6032	1.22431	0.209998	5.83008	5.53993e-09	3.92117e-08
COBS16642	13.6982	1.22345	0.212217	5.76508	8.16201e-09	5.61554e-08
COBS04401	101.763	1.22302	0.157719	7.75444	8.87356e-15	1.5155e-13
COBS10448	186.639	1.22225	0.137051	8.91819	4.73968e-19	1.51222e-17
COBS09530	7.46096	1.22107	0.241921	5.04739	4.47877e-07	2.27815e-06
COBS17635	107.207	1.22012	0.184235	6.62264	3.5285e-11	3.53507e-10
COBS06749	465.123	1.21842	0.0904675	13.4681	2.41099e-41	1.34617e-38
COBS08621	141.08	1.2181	0.114278	10.659	1.58217e-26	1.46296e-24
COBS09972	101.432	1.21666	0.198582	6.12673	8.97044e-10	7.17882e-09
COBS08925	1133.54	1.21582	0.111851	10.87	1.60227e-27	1.73583e-25
COBS12600	29.0621	1.21554	0.182575	6.65776	2.78036e-11	2.81272e-10
COBS14459	29.7093	1.21522	0.238944	5.08579	3.66108e-07	1.89138e-06
COBS09741	56.6461	1.2149	0.153542	7.91254	2.52183e-15	4.61076e-14
COBS14596	175.687	1.21414	0.0746588	16.2625	1.82113e-59	6.60934e-56
COBS09917	10.7576	1.213	0.309458	3.91975	8.86401e-05	0.000298836
COBS18351	118.869	1.21279	0.153269	7.91282	2.51631e-15	4.60646e-14
COBS03127	93.8142	1.21247	0.16036	7.56092	4.00236e-14	6.2075e-13
COBS10661	8.45821	1.21054	0.261348	4.63191	3.62303e-06	1.58134e-05
COBS19498	22.8585	1.20947	0.314014	3.85166	0.000117319	0.00038672
COBS14575	644.018	1.20861	0.163584	7.3883	1.48717e-13	2.13122e-12
COBS00532	30.5898	1.20788	0.169977	7.1061	1.19365e-12	1.49898e-11
COBS19152	7.3166	1.20653	0.317719	3.79748	0.000146172	0.000473127
COBS17829	6.20751	1.2062	0.291258	4.14133	3.45295e-05	0.000125977
COBS09930	10.2465	1.2061	0.243126	4.96082	7.0198e-07	3.47093e-06
COBS09455	23.6749	1.2061	0.211091	5.71365	1.10579e-08	7.39761e-08
COBS03758	56.8086	1.19927	0.144287	8.31168	9.43589e-17	2.1139e-15
COBS11869	2.78159	1.19913	0.333894	3.59135	0.000328969	0.000989566
COBS18543	96.3893	1.1963	0.13792	8.67385	4.17741e-18	1.1496e-16
COBS09618	31.2737	1.19621	0.198346	6.03094	1.63004e-09	1.25269e-08
COBS01556	272.852	1.1953	0.14504	8.24113	1.70595e-16	3.67437e-15
COBS05027	5.33428	1.19489	0.276742	4.3177	1.57662e-05	6.11483e-05
COBS08949	102.945	1.19292	0.224319	5.31797	1.04931e-07	5.93181e-07
COBS15329	987.898	1.18965	0.106491	11.1714	5.63026e-29	7.36347e-27
COBS06843	332.107	1.18951	0.102889	11.5611	6.48704e-31	1.13461e-28
COBS06498	268.172	1.18831	0.187582	6.33491	2.37483e-10	2.08436e-09
COBS13272	36.8651	1.18826	0.165894	7.1628	7.90457e-13	1.03101e-11
COBS14920	85.3722	1.18819	0.160348	7.41005	1.26249e-13	1.83459e-12
COBS02294	22.8691	1.18804	0.226469	5.24591	1.55514e-07	8.5418e-07
COBS04003	9.91808	1.18794	0.284973	4.1686	3.0647e-05	0.000112891
COBS10036	4.76619	1.18781	0.284361	4.17711	2.9523e-05	0.000108999
COBS06755	172.372	1.18584	0.184755	6.41845	1.37668e-10	1.24908e-09
COBS06065	5.27194	1.18495	0.302871	3.91238	9.13926e-05	0.000306999
COBS06248	176.684	1.18407	0.129601	9.13626	6.46489e-20	2.35806e-18
COBS11262	83.8737	1.18295	0.154564	7.65345	1.95656e-14	3.19815e-13
COBS06425	19.1601	1.18259	0.249109	4.74729	2.0616e-06	9.42028e-06
COBS00287	22.0819	1.18252	0.21205	5.5766	2.45267e-08	1.53936e-07
COBS09465	15.3206	1.18247	0.20593	5.74209	9.35166e-09	6.35869e-08
COBS05496	87.1514	1.18246	0.105665	11.1907	4.52906e-29	6.08781e-27
COBS16637	10.0467	1.18174	0.295664	3.99689	6.41796e-05	0.000222521
COBS16966	541.416	1.18159	0.121344	9.73749	2.08648e-22	1.16051e-20
COBS04527	299.256	1.18103	0.123287	9.57952	9.75014e-22	4.94905e-20
COBS18557	8.94462	1.18088	0.315333	3.74486	0.000180497	0.000573491
COBS18987	578.397	1.1798	0.128504	9.18105	4.269e-20	1.6181e-18
COBS00330	78.0426	1.17935	0.194979	6.04861	1.46097e-09	1.12994e-08
COBS00321	10.3454	1.17935	0.317117	3.71897	0.000200039	0.000629518
COBS14297	151.863	1.17904	0.159052	7.41295	1.23524e-13	1.8004e-12
COBS13292	2496.64	1.17871	0.154062	7.65092	1.99554e-14	3.25131e-13
COBS02960	715.816	1.17871	0.153016	7.70314	1.32761e-14	2.21019e-13
COBS10446	5.88652	1.17847	0.264659	4.4528	8.47561e-06	3.44748e-05
COBS05357	46.6974	1.17708	0.16645	7.07167	1.53084e-12	1.87696e-11
COBS08698	140.23	1.17701	0.155335	7.57723	3.53019e-14	5.52834e-13
COBS07594	76.391	1.17671	0.134934	8.72061	2.76714e-18	7.81528e-17
COBS07563	286.942	1.17193	0.0707904	16.5549	1.47589e-61	1.07127e-57
COBS08503	26.6358	1.17143	0.202513	5.78448	7.2735e-09	5.05696e-08
COBS18385	23.7893	1.1673	0.20393	5.72402	1.0403e-08	6.98566e-08
COBS04653	7.08779	1.1672	0.319885	3.64883	0.000263439	0.00080853
COBS15825	7.10634	1.16701	0.269708	4.32694	1.51192e-05	5.87604e-05
COBS11327	220.539	1.16628	0.126518	9.21833	3.01772e-20	1.17134e-18
COBS14532	7.70448	1.1661	0.318403	3.66233	0.000249931	0.000771102
COBS19459	570.545	1.16175	0.203678	5.70384	1.17141e-08	7.78633e-08
COBS07346	16.7317	1.16125	0.186599	6.22325	4.86951e-10	4.07909e-09
COBS16330	22.7458	1.15973	0.226547	5.11914	3.06932e-07	1.60741e-06
COBS02771	1217.78	1.15951	0.229717	5.04755	4.47505e-07	2.27815e-06
COBS18206	6.26878	1.15938	0.273646	4.23681	2.26719e-05	8.54434e-05
COBS14186	4.31865	1.15861	0.301638	3.84105	0.000122507	0.000402636
COBS02127	3844.42	1.15852	0.157839	7.33988	2.13781e-13	3.00432e-12
COBS05843	285.148	1.15738	0.224071	5.16524	2.40124e-07	1.28063e-06
COBS17429	374.448	1.15687	0.140328	8.24405	1.66472e-16	3.60159e-15
COBS03668	105.406	1.15633	0.203633	5.67851	1.35874e-08	8.91717e-08
COBS16638	10.4088	1.15443	0.244599	4.7197	2.36194e-06	1.06817e-05
COBS00830	51.654	1.15389	0.229513	5.02756	4.96773e-07	2.50753e-06
COBS19275	141.299	1.15384	0.114719	10.058	8.47226e-24	5.56524e-22
COBS03086	36.1756	1.15381	0.216147	5.33808	9.39367e-08	5.34986e-07
COBS15661	7.68208	1.15336	0.278611	4.1397	3.47768e-05	0.000126848
COBS15668	9.47788	1.15267	0.224546	5.13335	2.84626e-07	1.50143e-06
COBS04870	1064.81	1.15099	0.174284	6.6041	3.99938e-11	3.97936e-10
COBS12233	52.4161	1.15082	0.134312	8.56829	1.05029e-17	2.73736e-16
COBS10646	3.77391	1.15039	0.314768	3.65472	0.000257465	0.000791031
COBS00217	11.143	1.14974	0.244136	4.70942	2.48427e-06	1.11868e-05
COBS11239	7.7555	1.14889	0.282602	4.0654	4.79508e-05	0.000170154
COBS06703	28.6794	1.14849	0.168537	6.81447	9.46109e-12	1.03346e-10
COBS05315	1088.92	1.14794	0.129524	8.86282	7.8014e-19	2.41035e-17
COBS13738	14.5846	1.14715	0.283463	4.04692	5.18959e-05	0.00018308
COBS07849	757.415	1.147	0.123811	9.26413	1.96667e-20	7.77934e-19
COBS10334	104.712	1.14543	0.266996	4.29007	1.78616e-05	6.87424e-05
COBS00763	126.345	1.1447	0.211088	5.42283	5.86631e-08	3.45062e-07
COBS19773	15.1326	1.14467	0.185764	6.16197	7.18456e-10	5.83323e-09
COBS05964	677.054	1.14422	0.115643	9.89444	4.4008e-23	2.59701e-21
COBS01548	47.9926	1.14264	0.232449	4.91567	8.84788e-07	4.30012e-06
COBS08744	14.9037	1.14139	0.201112	5.67538	1.38379e-08	9.06517e-08
COBS02299	8.26224	1.14121	0.24102	4.73494	2.19116e-06	9.96213e-06
COBS11887	285.536	1.14099	0.173596	6.57269	4.94126e-11	4.84024e-10
COBS06394	143.461	1.14052	0.165208	6.90354	5.07237e-12	5.77081e-11
COBS09194	151.326	1.14001	0.119413	9.54672	1.33871e-21	6.65548e-20
COBS07912	1026.3	1.13892	0.167401	6.80355	1.02073e-11	1.1083e-10
COBS11275	103.652	1.138	0.143155	7.94942	1.87382e-15	3.49195e-14
COBS12048	9.44361	1.13761	0.277381	4.10126	4.10907e-05	0.000147872
COBS12898	33.5131	1.13629	0.169429	6.70657	1.99254e-11	2.05584e-10
COBS03586	16.1584	1.13464	0.246723	4.59884	4.24858e-06	1.82583e-05
COBS00561	25.69	1.13415	0.164688	6.88665	5.71234e-12	6.46345e-11
COBS14686	5.20313	1.13389	0.309074	3.66868	0.000243803	0.000754483
COBS06911	16.3337	1.13333	0.191267	5.92537	3.11598e-09	2.29968e-08
COBS02466	225.14	1.13065	0.20392	5.54458	2.94662e-08	1.8257e-07
COBS06242	618.259	1.13015	0.176257	6.41195	1.43669e-10	1.30109e-09
COBS14919	161.325	1.12998	0.156613	7.21511	5.38897e-13	7.19702e-12
COBS01115	248.496	1.1289	0.0894704	12.6176	1.68866e-36	5.3292e-34
COBS01401	252.486	1.12858	0.175495	6.43084	1.26897e-10	1.15641e-09
COBS03319	18.2853	1.12855	0.204338	5.52294	3.33382e-08	2.04553e-07
COBS10936	19.4032	1.12777	0.20044	5.62649	1.83917e-08	1.18086e-07
COBS04616	184.144	1.1277	0.124728	9.04123	1.54916e-19	5.19379e-18
COBS13247	30.0605	1.12763	0.173597	6.49568	8.26607e-11	7.75686e-10
COBS07562	107.043	1.12668	0.160742	7.00927	2.39566e-12	2.86238e-11
COBS08436	6.23104	1.12595	0.274065	4.10834	3.98514e-05	0.000143625
COBS19246	89.3185	1.12496	0.134989	8.33374	7.83291e-17	1.7879e-15
COBS06696	276.788	1.12484	0.11167	10.0729	7.28163e-24	4.80489e-22
COBS03072	100.156	1.12483	0.145591	7.72594	1.11035e-14	1.87648e-13
COBS02984	5.32525	1.12121	0.267288	4.19476	2.73165e-05	0.000101368
COBS04879	18.911	1.11835	0.223579	5.00202	5.67332e-07	2.83705e-06
COBS18847	210.474	1.11633	0.164848	6.77187	1.27128e-11	1.36301e-10
COBS14272	247.263	1.11616	0.0951745	11.7275	9.21449e-32	1.83749e-29
COBS00120	43.7753	1.11598	0.165426	6.74609	1.51878e-11	1.61053e-10
COBS17431	101.184	1.11583	0.136023	8.20327	2.33929e-16	4.87923e-15
COBS11679	3524.93	1.11304	0.13316	8.35867	6.343e-17	1.46626e-15
COBS12987	140.687	1.11201	0.210691	5.27792	1.30659e-07	7.25347e-07
COBS04525	13.9317	1.11033	0.20445	5.4308	5.61016e-08	3.31068e-07
COBS12731	133.386	1.11016	0.243975	4.55031	5.35664e-06	2.25988e-05
COBS04367	215.514	1.10904	0.159808	6.93987	3.92458e-12	4.53608e-11
COBS12170	169.821	1.10894	0.110559	10.0302	1.12238e-23	7.33943e-22
COBS09090	1455.14	1.10871	0.202643	5.47125	4.46862e-08	2.67619e-07
COBS00850	22.6372	1.10822	0.172372	6.42925	1.28238e-10	1.1679e-09
COBS17930	718.857	1.10794	0.151048	7.33503	2.21671e-13	3.10618e-12
COBS14024	74.9664	1.10651	0.146889	7.53294	4.96116e-14	7.60519e-13
COBS10024	1848.32	1.10586	0.151442	7.3022	2.83103e-13	3.91784e-12
COBS18143	4.59487	1.10551	0.293754	3.76338	0.000167635	0.000535869
COBS11941	800.707	1.10415	0.139329	7.92474	2.28632e-15	4.22809e-14
COBS17416	27.3662	1.10399	0.176242	6.26405	3.75112e-10	3.18078e-09
COBS03037	27.8115	1.10282	0.213082	5.17558	2.27209e-07	1.21577e-06
COBS02614	2238.1	1.102	0.12047	9.14747	5.82815e-20	2.13116e-18
COBS04981	1229.75	1.10161	0.103472	10.6465	1.81141e-26	1.62322e-24
COBS07071	193.012	1.10129	0.197882	5.56537	2.6159e-08	1.63615e-07
COBS11888	281.018	1.10093	0.180722	6.0918	1.11646e-09	8.81782e-09
COBS07867	5.47421	1.10006	0.284971	3.86023	0.00011328	0.000374604
COBS06727	31.4233	1.0999	0.141694	7.76251	8.32634e-15	1.42876e-13
COBS00260	9.06061	1.09853	0.250608	4.38346	1.16809e-05	4.64326e-05
COBS04740	85.047	1.09826	0.268136	4.09592	4.20502e-05	0.00015095
COBS16245	9.34158	1.09743	0.256149	4.28433	1.83291e-05	7.02523e-05
COBS14695	499.476	1.09575	0.127566	8.58973	8.71713e-18	2.29667e-16
COBS05921	19.1037	1.09481	0.235981	4.63939	3.4944e-06	1.52888e-05
COBS17632	27.8812	1.09419	0.222384	4.92026	8.64285e-07	4.20893e-06
COBS10628	5.7438	1.09379	0.255204	4.28596	1.81951e-05	6.98225e-05
COBS08890	939.73	1.09336	0.158845	6.88317	5.85357e-12	6.61295e-11
COBS09102	86.3006	1.09279	0.1666	6.55937	5.40347e-11	5.25399e-10
COBS19398	28.6158	1.09082	0.157345	6.93264	4.13072e-12	4.74412e-11
COBS13249	28.8383	1.09046	0.196543	5.54821	2.88614e-08	1.79128e-07
COBS07399	278.138	1.09016	0.172929	6.30409	2.899e-10	2.50654e-09
COBS02973	170.997	1.08979	0.0949693	11.4752	1.75762e-30	2.80217e-28
COBS13179	18.6774	1.08803	0.224516	4.84611	1.25906e-06	5.96146e-06
COBS05521	21.6705	1.08793	0.21687	5.01653	5.26139e-07	2.64564e-06
COBS05683	61.9623	1.08768	0.119846	9.07561	1.13039e-19	3.91643e-18
COBS12986	11.1351	1.0869	0.232558	4.67367	2.9587e-06	1.3127e-05
COBS05539	78.2811	1.08684	0.152445	7.12938	1.0082e-12	1.28386e-11
COBS12553	77.866	1.08637	0.126721	8.57289	1.00916e-17	2.64439e-16
COBS17494	45.9464	1.08566	0.131307	8.26805	1.36166e-16	2.99958e-15
COBS05417	690.854	1.08444	0.14545	7.45572	8.93752e-14	1.31722e-12
COBS16250	41.9138	1.08406	0.16413	6.6049	3.97774e-11	3.96056e-10
COBS08784	101.98	1.08379	0.150547	7.19896	6.06732e-13	7.99993e-12
COBS05498	85.8534	1.08368	0.133802	8.09913	5.53534e-16	1.10532e-14
COBS15947	1745.97	1.0833	0.143149	7.56761	3.80164e-14	5.91515e-13
COBS16753	7.42896	1.08235	0.257834	4.19784	2.69473e-05	0.000100204
COBS02510	778.822	1.08117	0.128273	8.42867	3.49627e-17	8.34791e-16
COBS10232	437.113	1.08105	0.118972	9.08665	1.02137e-19	3.55569e-18
COBS17259	50.4878	1.07958	0.203599	5.30248	1.14238e-07	6.42289e-07
COBS11546	7.92173	1.07922	0.236107	4.57088	4.85671e-06	2.06517e-05
COBS16389	19.0784	1.07904	0.204772	5.26945	1.36831e-07	7.57581e-07
COBS13892	1112.39	1.07843	0.115165	9.36424	7.66018e-21	3.25155e-19
COBS16087	486.842	1.07584	0.0974248	11.0427	2.37695e-28	2.87552e-26
COBS19460	8.91176	1.07515	0.254898	4.21797	2.46508e-05	9.23498e-05
COBS17229	504.02	1.07362	0.129854	8.26785	1.36391e-16	2.99999e-15
COBS15719	12.1861	1.07224	0.266416	4.02468	5.70524e-05	0.000199553
COBS05326	29.9309	1.07103	0.224578	4.76907	1.85076e-06	8.54563e-06
COBS19894	5.27702	1.06989	0.283032	3.78013	0.000156749	0.000503546
COBS12002	46.6273	1.06973	0.189073	5.65774	1.53381e-08	9.95812e-08
COBS17214	13.4354	1.06957	0.207638	5.15112	2.58935e-07	1.3754e-06
COBS16404	64.8626	1.06785	0.152266	7.01306	2.33157e-12	2.79499e-11
COBS13860	37.931	1.06684	0.152732	6.98506	2.84742e-12	3.37713e-11
COBS09377	207.263	1.06651	0.105371	10.1215	4.43387e-24	3.06507e-22
COBS03048	111.71	1.06514	0.171539	6.2093	5.32219e-10	4.41751e-09
COBS13810	47.1612	1.06489	0.139229	7.64851	2.03326e-14	3.30166e-13
COBS04390	51.0361	1.06322	0.12094	8.79127	1.47884e-18	4.35464e-17
COBS02716	506.295	1.06238	0.136015	7.81078	5.68351e-15	9.98881e-14
COBS16104	478.279	1.05688	0.170475	6.19961	5.66029e-10	4.67409e-09
COBS16586	9.17642	1.0568	0.267187	3.95529	7.64407e-05	0.000261042
COBS05863	50.5967	1.05522	0.184496	5.71947	1.06857e-08	7.15849e-08
COBS06766	92.4775	1.05475	0.205112	5.14234	2.71332e-07	1.43605e-06
COBS15435	103.496	1.05431	0.191925	5.49332	3.94455e-08	2.39795e-07
COBS01722	341.183	1.05407	0.13008	8.10322	5.35225e-16	1.0717e-14
COBS05199	7.90111	1.05329	0.23289	4.52268	6.10622e-06	2.55091e-05
COBS16023	232.264	1.05282	0.126369	8.33137	7.99135e-17	1.8155e-15
COBS00293	11.0104	1.05189	0.19282	5.4553	4.88894e-08	2.90872e-07
COBS06476	14.6106	1.05022	0.189958	5.52871	3.22589e-08	1.98265e-07
COBS05389	10.5343	1.04989	0.207598	5.05731	4.25211e-07	2.17658e-06
COBS02032	11.8163	1.049	0.257332	4.07643	4.57321e-05	0.000163079
COBS10112	8.84502	1.04892	0.235256	4.45861	8.24942e-06	3.36396e-05
COBS08378	127.395	1.04822	0.118744	8.82753	1.0701e-18	3.22295e-17
COBS09342	35.9659	1.04797	0.219316	4.77835	1.76737e-06	8.19185e-06
COBS09451	35.7129	1.04796	0.153163	6.84213	7.80248e-12	8.6267e-11
COBS17764	145.579	1.04763	0.173747	6.02962	1.64344e-09	1.26165e-08
COBS10620	11320.4	1.04724	0.2444	4.28495	1.82782e-05	7.00856e-05
COBS06912	15.3858	1.04724	0.183024	5.72186	1.05366e-08	7.06184e-08
COBS11579	54.2904	1.0468	0.145663	7.18646	6.6495e-13	8.73582e-12
COBS10595	336.401	1.04668	0.175742	5.9558	2.58805e-09	1.93067e-08
COBS14973	37.129	1.04639	0.197589	5.2958	1.18495e-07	6.6391e-07
COBS10933	16.6103	1.0463	0.213501	4.90067	9.55117e-07	4.61259e-06
COBS05641	306.94	1.04618	0.102006	10.256	1.11181e-24	8.19299e-23
COBS00903	12.7401	1.04532	0.214133	4.88165	1.052e-06	5.05023e-06
COBS07662	1970.42	1.04392	0.127154	8.20991	2.21349e-16	4.64353e-15
COBS16068	20.0951	1.04349	0.174615	5.97594	2.28773e-09	1.72167e-08
COBS09185	45.907	1.04267	0.227304	4.58714	4.49358e-06	1.92599e-05
COBS08575	1090.16	1.04195	0.125338	8.31312	9.3218e-17	2.09157e-15
COBS05813	893.103	1.04109	0.130207	7.99566	1.28884e-15	2.44257e-14
COBS16960	10.4926	1.04047	0.276085	3.76867	0.000164121	0.000525716
COBS05289	324.92	1.04004	0.145913	7.12781	1.01979e-12	1.29592e-11
COBS19309	239.643	1.0394	0.0921302	11.2819	1.61246e-29	2.25077e-27
COBS14289	739.427	1.03935	0.0960767	10.818	2.83036e-27	2.91406e-25
COBS04584	8.40156	1.03625	0.211958	4.88892	1.0139e-06	4.87378e-06
COBS01885	39.3471	1.03596	0.161403	6.41848	1.37644e-10	1.24908e-09
COBS13980	114.876	1.03582	0.159396	6.49844	8.11557e-11	7.62549e-10
COBS02129	25.2594	1.03547	0.202494	5.1136	3.1608e-07	1.64937e-06
COBS10746	31.5913	1.0352	0.180866	5.7236	1.0429e-08	6.99944e-08
COBS20163	5.37613	1.03489	0.279019	3.70904	0.000208044	0.000652728
COBS17170	67.3349	1.03374	0.186052	5.55619	2.75727e-08	1.71423e-07
COBS14436	2174.21	1.03358	0.124038	8.33276	7.89793e-17	1.79991e-15
COBS10091	661.518	1.03281	0.10086	10.2401	1.31146e-24	9.56708e-23
COBS17260	722.046	1.03243	0.21042	4.90651	9.27125e-07	4.48786e-06
COBS07334	92.5155	1.03182	0.140452	7.34642	2.03581e-13	2.87648e-12
COBS01858	548.963	1.03044	0.168575	6.11269	9.79675e-10	7.78858e-09
COBS02976	77.8113	1.02877	0.148875	6.91029	4.8367e-12	5.52e-11
COBS09470	7.29148	1.02837	0.252753	4.06865	4.72855e-05	0.000167999
COBS07658	69.5862	1.02826	0.258052	3.9847	6.75666e-05	0.000233206
COBS09860	5.27535	1.02805	0.259614	3.95993	7.49721e-05	0.000256752
COBS10319	41.5095	1.02776	0.216614	4.74464	2.08881e-06	9.53863e-06
COBS03483	14.8272	1.02769	0.214647	4.78781	1.68614e-06	7.83539e-06
COBS14993	867.276	1.02753	0.148107	6.93771	3.98507e-12	4.60233e-11
COBS17364	1440.74	1.02749	0.100325	10.2416	1.29103e-24	9.46561e-23
COBS00347	33.1519	1.02748	0.156906	6.54842	5.81493e-11	5.59783e-10
COBS03049	863.815	1.02734	0.171924	5.97552	2.29362e-09	1.72521e-08
COBS16635	70.09	1.02692	0.157619	6.51521	7.25903e-11	6.86063e-10
COBS08900	8.56713	1.02607	0.255871	4.0101	6.06921e-05	0.000211236
COBS19819	10.3212	1.02518	0.267576	3.83137	0.00012743	0.000416926
COBS06432	85.3602	1.02517	0.169412	6.05137	1.43619e-09	1.11255e-08
COBS15363	314.926	1.0251	0.0934569	10.9687	5.40246e-28	6.2861e-26
COBS13226	67.7705	1.02483	0.219147	4.67648	2.91846e-06	1.29603e-05
COBS19064	102.407	1.02424	0.121462	8.43261	3.38041e-17	8.08458e-16
COBS10594	133.819	1.02384	0.19157	5.34445	9.06917e-08	5.17928e-07
COBS16407	35.5024	1.02214	0.16599	6.1578	7.37619e-10	5.98214e-09
COBS02901	9.92226	1.02146	0.210801	4.84562	1.26214e-06	5.97406e-06
COBS16497	74.9393	1.02007	0.137772	7.40402	1.32119e-13	1.91606e-12
COBS01395	53.7467	1.0198	0.148532	6.86587	6.60868e-12	7.40264e-11
COBS11245	140.606	1.01932	0.174459	5.84274	5.13503e-09	3.65239e-08
COBS12285	278.588	1.01881	0.114675	8.88434	6.43017e-19	2.02488e-17
COBS01478	221.539	1.01803	0.154304	6.59757	4.17946e-11	4.13306e-10
COBS14974	18.2612	1.01701	0.207319	4.90552	9.31795e-07	4.50745e-06
COBS14804	245.789	1.01698	0.139015	7.31561	2.56206e-13	3.56601e-12
COBS18533	188.102	1.01597	0.165096	6.15378	7.56573e-10	6.12217e-09
COBS18306	124.824	1.01517	0.141847	7.15675	8.26114e-13	1.07269e-11
COBS17929	117.621	1.01472	0.187862	5.40142	6.61138e-08	3.84833e-07
COBS17636	309.796	1.01442	0.152713	6.64265	3.08097e-11	3.0974e-10
COBS12452	164.469	1.01433	0.138316	7.33339	2.24408e-13	3.13846e-12
COBS17178	20.1093	1.01417	0.207716	4.88245	1.04774e-06	5.03312e-06
COBS16732	262.057	1.01361	0.211502	4.79245	1.64758e-06	7.66355e-06
COBS11335	213.209	1.01104	0.156717	6.45134	1.10864e-10	1.01861e-09
COBS03013	48.3386	1.01089	0.130643	7.73782	1.01138e-14	1.71522e-13
COBS17594	18.3872	1.01039	0.211224	4.78349	1.72274e-06	7.99009e-06
COBS11516	528.201	1.00987	0.13668	7.38858	1.4841e-13	2.12893e-12
COBS04881	136.696	1.00962	0.185875	5.4317	5.58191e-08	3.29535e-07
COBS18127	97.0459	1.00929	0.236222	4.27262	1.93194e-05	7.37469e-05
COBS06457	251.411	1.00928	0.146841	6.87329	6.27377e-12	7.06018e-11
COBS06906	368.714	1.00907	0.149125	6.76659	1.31856e-11	1.40954e-10
COBS15968	178.118	1.00823	0.104907	9.61071	7.20534e-22	3.73571e-20
COBS06726	1912.74	1.00816	0.101448	9.93774	2.85221e-23	1.76193e-21
COBS01798	189.476	1.00814	0.10065	10.0163	1.29309e-23	8.38026e-22
COBS19761	388.174	1.00518	0.142141	7.07174	1.53002e-12	1.87696e-11
COBS03169	10.1376	1.00416	0.25656	3.91395	9.0797e-05	0.00030554
COBS05527	317.736	1.0037	0.134629	7.45528	8.96778e-14	1.32034e-12
COBS17931	506.848	1.00234	0.153564	6.52723	6.6999e-11	6.37787e-10
COBS07286	212.116	1.00156	0.110982	9.0246	1.80355e-19	5.97765e-18
COBS15720	195.472	1.00102	0.158694	6.3079	2.82852e-10	2.45144e-09
COBS11142	131.435	0.999587	0.0692623	14.4319	3.25943e-47	3.63978e-44
COBS17347	59.9894	0.998987	0.115174	8.67375	4.18123e-18	1.1496e-16
COBS16759	3452.13	0.99891	0.132901	7.51619	5.63939e-14	8.55455e-13
COBS02118	21.5651	0.9979	0.187403	5.32488	1.01017e-07	5.72169e-07
COBS04001	6.54636	0.997758	0.273607	3.64668	0.000265646	0.000814269
COBS02352	63.6637	0.99601	0.156154	6.37838	1.78969e-10	1.60376e-09
COBS01792	46.5198	0.99549	0.109783	9.0678	1.21441e-19	4.17762e-18
COBS04938	14.6773	0.995215	0.217297	4.57997	4.65034e-06	1.98498e-05
COBS00761	19.7375	0.995095	0.21766	4.5718	4.83562e-06	2.05681e-05
COBS13294	1301.16	0.994523	0.156936	6.33713	2.3409e-10	2.05832e-09
COBS07736	4.48401	0.994254	0.275668	3.60671	0.000310105	0.000939243
COBS18066	236.91	0.993975	0.0782653	12.7001	5.90672e-37	2.09141e-34
COBS09698	250.51	0.993771	0.0736076	13.5009	1.54438e-41	8.96792e-39
COBS17437	108.127	0.993247	0.196693	5.04974	4.42412e-07	2.25351e-06
COBS11429	425.845	0.992945	0.0929635	10.681	1.24893e-26	1.17732e-24
COBS19282	62.9282	0.991978	0.181759	5.45766	4.82447e-08	2.87272e-07
COBS11740	595.547	0.991628	0.14006	7.08001	1.44142e-12	1.77331e-11
COBS07763	1345.54	0.991307	0.131422	7.54291	4.59586e-14	7.07509e-13
COBS09889	8.6339	0.991015	0.258336	3.83615	0.000124976	0.00040982
COBS17195	439.185	0.990899	0.10588	9.35874	8.06895e-21	3.39528e-19
COBS19249	3379.41	0.990839	0.215167	4.60497	4.12529e-06	1.776e-05
COBS04872	202.092	0.990732	0.161821	6.1224	9.21767e-10	7.36257e-09
COBS10848	23.8267	0.990172	0.196665	5.03482	4.78309e-07	2.42106e-06
COBS09822	8.27708	0.989783	0.215899	4.58447	4.55148e-06	1.94908e-05
COBS17091	7.90108	0.989626	0.259076	3.81983	0.000133545	0.00043556
COBS15302	35.2486	0.989202	0.203565	4.8594	1.17745e-06	5.60427e-06
COBS02473	51.6375	0.98672	0.188858	5.22468	1.7446e-07	9.51046e-07
COBS12444	8.98159	0.986235	0.25263	3.90387	9.46671e-05	0.000316582
COBS01038	22.8312	0.985538	0.199786	4.93296	8.09912e-07	3.96811e-06
COBS14907	261.759	0.985035	0.139671	7.05254	1.75681e-12	2.13956e-11
COBS15267	1232.81	0.984596	0.079615	12.367	3.94462e-35	1.10123e-32
COBS07081	5043.79	0.984291	0.22336	4.40675	1.04933e-05	4.20223e-05
COBS09949	576.047	0.982015	0.149729	6.55862	5.43091e-11	5.27361e-10
COBS01470	183.492	0.981985	0.111548	8.80325	1.32907e-18	3.93757e-17
COBS03192	601.174	0.981114	0.085545	11.469	1.88861e-30	2.94806e-28
COBS09186	1178.59	0.980485	0.112476	8.71726	2.85024e-18	8.00328e-17
COBS06840	40.025	0.979897	0.171057	5.72849	1.01326e-08	6.83209e-08
COBS11346	20.5674	0.979392	0.267873	3.65619	0.000255993	0.000787342
COBS17055	2956.88	0.979151	0.107025	9.14883	5.75548e-20	2.11525e-18
COBS11913	108.698	0.97907	0.117659	8.32124	8.70469e-17	1.96526e-15
COBS03075	112.267	0.978661	0.0936028	10.4555	1.38317e-25	1.12806e-23
COBS03667	218.61	0.978185	0.220451	4.4372	9.11348e-06	3.68936e-05
COBS05288	4148.22	0.978116	0.13645	7.1683	7.59326e-13	9.93075e-12
COBS15691	23.0857	0.977404	0.149261	6.5483	5.81975e-11	5.59877e-10
COBS13982	24.7459	0.976917	0.185896	5.25518	1.47878e-07	8.15322e-07
COBS16156	67.4273	0.976861	0.160542	6.08478	1.16649e-09	9.18323e-09
COBS15324	96.2023	0.976665	0.146995	6.64418	3.04901e-11	3.06739e-10
COBS05295	54.1918	0.975997	0.161271	6.05192	1.43129e-09	1.10994e-08
COBS03485	13.4163	0.97478	0.242229	4.0242	5.71691e-05	0.000199885
COBS05627	10.395	0.974476	0.244534	3.98503	6.74711e-05	0.000232987
COBS17776	72.1419	0.973194	0.159951	6.08432	1.16984e-09	9.19967e-09
COBS10252	14.8311	0.972977	0.177323	5.48703	4.08757e-08	2.47556e-07
COBS11110	1243.92	0.972632	0.103595	9.38882	6.0679e-21	2.66126e-19
COBS17980	176.412	0.971824	0.194112	5.0065	5.54273e-07	2.77557e-06
COBS02566	103.777	0.97124	0.25188	3.85597	0.000115272	0.000380926
COBS01507	19.0747	0.970769	0.191215	5.07684	3.83769e-07	1.9756e-06
COBS02663	26.2921	0.970536	0.139658	6.94936	3.6696e-12	4.26173e-11
COBS01311	13.9303	0.970378	0.201975	4.80446	1.55172e-06	7.24552e-06
COBS02112	7.84879	0.969356	0.219699	4.4122	1.02327e-05	4.10582e-05
COBS19234	8.19216	0.969184	0.237008	4.08924	4.32788e-05	0.000155054
COBS01180	602.766	0.969034	0.126426	7.66485	1.79045e-14	2.94027e-13
COBS13787	2679.02	0.968632	0.0908948	10.6566	1.62384e-26	1.48259e-24
COBS09189	128.147	0.967986	0.111346	8.69348	3.51496e-18	9.75653e-17
COBS07349	14.1969	0.967222	0.261448	3.69949	0.000216037	0.00067576
COBS13194	19.2586	0.965826	0.176906	5.45953	4.77386e-08	2.84608e-07
COBS02153	13.1227	0.963788	0.212084	4.54437	5.50992e-06	2.31781e-05
COBS00309	30.5675	0.963422	0.17317	5.56345	2.64489e-08	1.65001e-07
COBS00510	7.69529	0.9631	0.26106	3.6892	0.000224963	0.000702168
COBS12648	10.4124	0.963074	0.203967	4.72172	2.33857e-06	1.05925e-05
COBS13245	132.924	0.962533	0.177527	5.42188	5.89742e-08	3.46611e-07
COBS08934	8.38768	0.962155	0.221989	4.33425	1.46255e-05	5.70901e-05
COBS16806	322.782	0.962055	0.212135	4.5351	5.75749e-06	2.41635e-05
COBS18680	34.5391	0.961132	0.184339	5.21393	1.84878e-07	1.00328e-06
COBS15920	1129.35	0.960731	0.117041	8.20849	2.23979e-16	4.69192e-15
COBS08625	3218.86	0.959455	0.146501	6.54913	5.78716e-11	5.5785e-10
COBS12565	7.33383	0.958559	0.25288	3.79057	0.000150304	0.00048499
COBS16427	233.772	0.956206	0.229317	4.1698	3.04866e-05	0.000112329
COBS04775	994	0.956002	0.203947	4.6875	2.76559e-06	1.23305e-05
COBS08953	773.845	0.955819	0.0881088	10.8482	2.0348e-27	2.172e-25
COBS13890	930.963	0.954861	0.142459	6.70273	2.04566e-11	2.10021e-10
COBS06262	99.4772	0.954614	0.181537	5.25851	1.45228e-07	8.01016e-07
COBS12880	53.7933	0.954378	0.20922	4.56161	5.07634e-06	2.15037e-05
COBS03148	444.155	0.953599	0.150356	6.34226	2.2642e-10	1.99693e-09
COBS06529	812.155	0.953453	0.104377	9.13474	6.55665e-20	2.38554e-18
COBS04925	130.215	0.952476	0.1001	9.51526	1.81258e-21	8.80041e-20
COBS06235	65.0094	0.951388	0.105625	9.0072	2.11387e-19	6.95852e-18
COBS11537	708.435	0.951211	0.157843	6.02631	1.67746e-09	1.28505e-08
COBS07309	46.7742	0.951204	0.151605	6.27422	3.51396e-10	2.99895e-09
COBS06256	9.83245	0.950974	0.257897	3.68742	0.000226536	0.000706775
COBS04776	20.1698	0.950696	0.246503	3.85674	0.000114911	0.000379818
COBS13795	182.057	0.950399	0.166511	5.70773	1.14495e-08	7.6314e-08
COBS11514	143.494	0.949856	0.114602	8.28833	1.1485e-16	2.54935e-15
COBS09044	86.3479	0.949107	0.13636	6.96031	3.39527e-12	3.96853e-11
COBS14951	57.2104	0.94832	0.131625	7.20473	5.81573e-13	7.71022e-12
COBS11005	406.518	0.948091	0.119749	7.91735	2.42629e-15	4.4529e-14
COBS04158	218.19	0.947981	0.101009	9.38508	6.28696e-21	2.73257e-19
COBS16165	18.926	0.94724	0.196402	4.82298	1.41431e-06	6.64234e-06
COBS05082	126.196	0.947179	0.134105	7.06296	1.62993e-12	1.99172e-11
COBS11684	194.756	0.946778	0.198967	4.75846	1.95077e-06	8.9675e-06
COBS19522	62.4065	0.946603	0.218472	4.33284	1.47196e-05	5.73957e-05
COBS13511	10.7244	0.946522	0.24746	3.82494	0.000130802	0.000427283
COBS07342	7612.61	0.946359	0.23911	3.95784	7.56304e-05	0.000258701
COBS01334	45.2949	0.94594	0.172003	5.49956	3.80736e-08	2.31843e-07
COBS01833	422.033	0.944726	0.165993	5.69135	1.26037e-08	8.32429e-08
COBS01640	39.2289	0.944067	0.16722	5.64564	1.64564e-08	1.06271e-07
COBS19116	194.644	0.94394	0.124366	7.58999	3.19925e-14	5.04272e-13
COBS12482	9.86996	0.94331	0.197132	4.78518	1.70835e-06	7.93095e-06
COBS14610	312.9	0.943111	0.132271	7.13015	1.00261e-12	1.27899e-11
COBS12989	159.682	0.943097	0.135083	6.98161	2.91816e-12	3.45256e-11
COBS00868	226.428	0.94185	0.165715	5.68357	1.31914e-08	8.67689e-08
COBS01361	2620.9	0.941617	0.105234	8.94784	3.62499e-19	1.16683e-17
COBS08571	31.0626	0.940857	0.244314	3.85102	0.000117627	0.000387647
COBS00206	24.8624	0.940728	0.225752	4.16709	3.08511e-05	0.000113556
COBS11883	61.4657	0.940379	0.24689	3.80891	0.000139583	0.000453315
COBS12120	241.644	0.940063	0.146717	6.40732	1.48095e-10	1.33784e-09
COBS18938	54.9138	0.938701	0.168713	5.5639	2.63809e-08	1.64719e-07
COBS18103	45.791	0.938029	0.203521	4.609	4.04604e-06	1.74603e-05
COBS01737	622.921	0.938	0.173655	5.40151	6.60822e-08	3.84803e-07
COBS14222	26.8277	0.937614	0.204663	4.58126	4.62176e-06	1.97626e-05
COBS15206	12.995	0.937587	0.192617	4.86763	1.12943e-06	5.3934e-06
COBS09454	19.6401	0.937541	0.202197	4.63677	3.5389e-06	1.54648e-05
COBS01961	51.8562	0.937393	0.129744	7.22492	5.0141e-13	6.75229e-12
COBS08272	57.915	0.936696	0.142283	6.58334	4.60011e-11	4.52744e-10
COBS10569	132.087	0.936646	0.159558	5.87026	4.35107e-09	3.13472e-08
COBS00414	727.385	0.936181	0.153532	6.09763	1.07654e-09	8.51669e-09
COBS02741	339.782	0.935284	0.0712882	13.1198	2.53758e-39	1.11631e-36
COBS17870	580.544	0.931924	0.0937974	9.9355	2.91718e-23	1.79444e-21
COBS19679	50.2496	0.931615	0.197134	4.72579	2.29228e-06	1.04056e-05
COBS06444	30.8576	0.930481	0.197662	4.70744	2.50843e-06	1.12739e-05
COBS16724	530.558	0.929672	0.131095	7.09161	1.32562e-12	1.64901e-11
COBS19211	12.9344	0.929481	0.258663	3.59341	0.000326384	0.000982807
COBS19623	1412.3	0.928888	0.096273	9.64849	4.98868e-22	2.64309e-20
COBS06277	198.984	0.928819	0.159128	5.83691	5.3177e-09	3.77307e-08
COBS17212	40.4382	0.92846	0.171673	5.40831	6.36228e-08	3.7243e-07
COBS09138	2296.32	0.928063	0.110176	8.42348	3.65476e-17	8.6693e-16
COBS13043	11.3155	0.927072	0.203922	4.54621	5.46204e-06	2.29978e-05
COBS02069	16.9375	0.92621	0.217682	4.25488	2.09158e-05	7.92987e-05
COBS11609	80.4223	0.925597	0.125025	7.40331	1.32827e-13	1.92248e-12
COBS06400	106.878	0.925246	0.123784	7.4747	7.73778e-14	1.14974e-12
COBS17446	41.8163	0.925245	0.177597	5.20981	1.89033e-07	1.02395e-06
COBS01802	823.785	0.924718	0.198592	4.65636	3.21845e-06	1.41798e-05
COBS14620	18.1438	0.924664	0.166769	5.54458	2.94661e-08	1.8257e-07
COBS11901	44.38	0.922319	0.171567	5.37585	7.62208e-08	4.39261e-07
COBS19681	68.8775	0.921339	0.233778	3.94109	8.11128e-05	0.000275764
COBS18648	19.3026	0.919959	0.216855	4.24228	2.21265e-05	8.35181e-05
COBS05881	441.909	0.919066	0.147799	6.21837	5.02357e-10	4.19122e-09
COBS06770	189.024	0.918453	0.0951359	9.65412	4.72179e-22	2.51085e-20
COBS13496	331.175	0.918238	0.172815	5.31341	1.07591e-07	6.07271e-07
COBS10688	84.047	0.917892	0.1823	5.03507	4.77677e-07	2.41871e-06
COBS10154	28.876	0.917889	0.208334	4.40585	1.05372e-05	4.21632e-05
COBS18537	66.7505	0.917361	0.158844	5.77523	7.68495e-09	5.30625e-08
COBS01935	119.649	0.917182	0.133345	6.87825	6.05939e-12	6.82951e-11
COBS08440	130.171	0.917142	0.248968	3.68377	0.000229812	0.000715457
COBS07275	138.782	0.916851	0.100885	9.08811	1.00772e-19	3.51662e-18
COBS01044	1619.1	0.916475	0.147571	6.21042	5.28441e-10	4.39117e-09
COBS15040	59.4003	0.916427	0.146191	6.26872	3.64034e-10	3.0977e-09
COBS06410	10.1238	0.915108	0.254265	3.59903	0.0003194	0.000964188
COBS15541	80.0855	0.914936	0.140657	6.50473	7.7835e-11	7.33721e-10
COBS02711	151.611	0.914899	0.10808	8.46498	2.56194e-17	6.25069e-16
COBS02557	20.2079	0.914362	0.17357	5.26797	1.37942e-07	7.62857e-07
COBS05378	947.056	0.91425	0.100514	9.09573	9.39561e-20	3.30938e-18
COBS15026	34.5563	0.913366	0.201698	4.52838	5.94388e-06	2.48606e-05
COBS05000	136.173	0.913267	0.139256	6.55817	5.44736e-11	5.28605e-10
COBS14692	2615.34	0.911442	0.0961604	9.47836	2.5831e-21	1.21356e-19
COBS11674	11.6696	0.910402	0.214355	4.24717	2.16488e-05	8.18853e-05
COBS09534	92.5221	0.909869	0.142243	6.39656	1.58916e-10	1.43113e-09
COBS18081	21.925	0.909451	0.143767	6.32587	2.51815e-10	2.20084e-09
COBS11920	21.628	0.908532	0.175402	5.1797	2.22241e-07	1.19226e-06
COBS15791	170.25	0.908241	0.185832	4.88743	1.0216e-06	4.90914e-06
COBS11927	916.88	0.907301	0.120366	7.53788	4.77678e-14	7.33804e-13
COBS02757	52.7079	0.90726	0.205247	4.42034	9.85461e-06	3.96836e-05
COBS15874	18.8697	0.906568	0.183914	4.92929	8.25285e-07	4.04125e-06
COBS10875	834.424	0.906155	0.0937813	9.66243	4.35423e-22	2.32391e-20
COBS16052	768.37	0.906083	0.222227	4.07729	4.5564e-05	0.000162639
COBS18088	135.554	0.905004	0.142254	6.36187	1.9931e-10	1.77714e-09
COBS05882	1039.64	0.904974	0.114358	7.91352	2.50212e-15	4.58627e-14
COBS07606	130.869	0.904908	0.0854959	10.5842	3.52679e-26	3.10293e-24
COBS16750	9906.52	0.904096	0.120925	7.47648	7.63395e-14	1.13763e-12
COBS00901	878.688	0.904015	0.0959575	9.42099	4.46838e-21	2.00208e-19
COBS16482	93.0379	0.903729	0.167289	5.40221	6.58246e-08	3.83457e-07
COBS01822	15.1544	0.903453	0.201932	4.47405	7.67518e-06	3.14481e-05
COBS05491	217.478	0.903304	0.174436	5.17843	2.23759e-07	1.19908e-06
COBS05639	263.617	0.903122	0.108395	8.33179	7.96282e-17	1.81185e-15
COBS04391	161.672	0.902716	0.148915	6.06195	1.34482e-09	1.04679e-08
COBS10720	30.274	0.902606	0.191338	4.71733	2.38964e-06	1.08002e-05
COBS18663	313.597	0.901242	0.177118	5.08838	3.61142e-07	1.86639e-06
COBS15967	113.718	0.900542	0.126625	7.11188	1.1447e-12	1.4425e-11
COBS19987	106.055	0.898306	0.182987	4.90912	9.14872e-07	4.43298e-06
COBS03056	133.189	0.898167	0.197152	4.55572	5.22062e-06	2.2057e-05
COBS14183	27.7395	0.897511	0.214988	4.1747	2.98384e-05	0.00011008
COBS13967	15.5616	0.897492	0.236821	3.78975	0.0001508	0.000485939
COBS13594	183.562	0.896947	0.129375	6.93294	4.12191e-12	4.74151e-11
COBS03871	325.018	0.894815	0.116252	7.69719	1.39087e-14	2.30757e-13
COBS05168	215.024	0.894616	0.166731	5.36564	8.06632e-08	4.63941e-07
COBS20280	62.1314	0.894287	0.139849	6.39466	1.60907e-10	1.44727e-09
COBS19772	7.15739	0.893907	0.24358	3.66987	0.000242673	0.000751148
COBS12572	7.04883	0.892742	0.224239	3.98121	6.85653e-05	0.000236316
COBS01299	67.6117	0.892355	0.208731	4.27514	1.91017e-05	7.29734e-05
COBS03412	105.842	0.891594	0.168475	5.29215	1.20888e-07	6.75992e-07
COBS06240	170.372	0.891459	0.0752408	11.8481	2.20203e-32	4.63289e-30
COBS00119	304.404	0.891448	0.095615	9.32332	1.12761e-20	4.62415e-19
COBS16463	63.699	0.890523	0.106593	8.35442	6.57533e-17	1.51755e-15
COBS07435	270.655	0.890352	0.163977	5.42974	5.64375e-08	3.32915e-07
COBS08401	9.72387	0.889778	0.231917	3.83663	0.000124736	0.000409127
COBS07758	14096.4	0.889379	0.138472	6.4228	1.33788e-10	1.21691e-09
COBS13808	9.79757	0.888235	0.202401	4.38849	1.14141e-05	4.54344e-05
COBS01755	147.065	0.886868	0.117946	7.51927	5.50839e-14	8.37332e-13
COBS18710	112.555	0.886526	0.191538	4.62847	3.68375e-06	1.60543e-05
COBS09963	88.1972	0.885467	0.107018	8.27396	1.29577e-16	2.85876e-15
COBS05914	448.293	0.885378	0.0901944	9.81633	9.57632e-23	5.47823e-21
COBS05775	524.993	0.884832	0.082728	10.6957	1.06634e-26	1.02517e-24
COBS05510	227.19	0.884481	0.163277	5.41705	6.05897e-08	3.55818e-07
COBS04105	50.7258	0.882837	0.131534	6.71186	1.92165e-11	1.99261e-10
COBS16005	25.2093	0.882464	0.163227	5.40636	6.4318e-08	3.75736e-07
COBS03717	29.6665	0.882116	0.163794	5.38551	7.22378e-08	4.17966e-07
COBS11230	17.1951	0.882037	0.205238	4.29763	1.72637e-05	6.66029e-05
COBS17218	360.414	0.881551	0.081278	10.8461	2.08083e-27	2.20492e-25
COBS02717	406.365	0.881203	0.108327	8.13469	4.12978e-16	8.38489e-15
COBS14117	13.8043	0.881065	0.242225	3.63738	0.000275427	0.000841764
COBS19095	40.868	0.87972	0.22937	3.83537	0.000125377	0.000410951
COBS15704	77.9645	0.879704	0.189307	4.64697	3.36845e-06	1.47778e-05
COBS11704	1120.85	0.879603	0.149089	5.89986	3.63821e-09	2.65491e-08
COBS03484	36.4916	0.879576	0.152215	5.77853	7.53583e-09	5.21189e-08
COBS00557	23.7697	0.879426	0.153658	5.72327	1.04495e-08	7.00992e-08
COBS18335	39.9542	0.879086	0.194842	4.51179	6.42818e-06	2.6731e-05
COBS16902	82.2887	0.877504	0.183755	4.77541	1.79343e-06	8.29939e-06
COBS08727	7.6209	0.877288	0.242313	3.62048	0.000294055	0.000893801
COBS18998	147.875	0.876506	0.205133	4.27286	1.92981e-05	7.36849e-05
COBS12403	16.0331	0.875597	0.200316	4.37109	1.23628e-05	4.88753e-05
COBS01721	139.329	0.873662	0.16144	5.41168	6.24359e-08	3.65919e-07
COBS06783	62.8225	0.873086	0.162351	5.37776	7.54196e-08	4.34989e-07
COBS10413	119.009	0.872372	0.21634	4.03241	5.52073e-05	0.000193726
COBS07317	427.905	0.872328	0.0966542	9.02524	1.79298e-19	5.95621e-18
COBS11709	9.3252	0.872084	0.197304	4.42001	9.86961e-06	3.9733e-05
COBS19046	81.2294	0.871659	0.12514	6.9655	3.27239e-12	3.84036e-11
COBS15915	175.076	0.871317	0.179899	4.84336	1.27664e-06	6.0368e-06
COBS05814	2292.53	0.871076	0.095058	9.16363	5.01808e-20	1.86789e-18
COBS05971	9.19863	0.8702	0.226792	3.83699	0.000124549	0.000408606
COBS11885	17.7815	0.869468	0.236046	3.68348	0.000230076	0.000715972
COBS06296	13.5598	0.86935	0.19549	4.44704	8.70631e-06	3.53438e-05
COBS11604	160.794	0.868057	0.120338	7.21347	5.45422e-13	7.26412e-12
COBS11765	15.6174	0.867309	0.175493	4.94214	7.72691e-07	3.79856e-06
COBS16323	296.549	0.866823	0.101402	8.5484	1.24804e-17	3.21238e-16
COBS04940	13.9745	0.866224	0.222197	3.89845	9.6809e-05	0.000323371
COBS05085	1079.95	0.866157	0.11586	7.4759	7.66799e-14	1.14053e-12
COBS11987	1192.39	0.865382	0.0974558	8.87974	6.70153e-19	2.10576e-17
COBS05780	13.936	0.864038	0.237005	3.64565	0.000266714	0.000817372
COBS10858	24.9296	0.863493	0.141039	6.12235	9.22032e-10	7.36257e-09
COBS06655	16.4953	0.862531	0.180587	4.77626	1.78584e-06	8.26953e-06
COBS13495	40.0171	0.861994	0.181978	4.73681	2.17104e-06	9.88613e-06
COBS07626	24.8964	0.861416	0.141478	6.08869	1.13841e-09	8.96704e-09
COBS05167	59.2351	0.860461	0.153901	5.59099	2.25783e-08	1.42819e-07
COBS14122	133.574	0.859829	0.159057	5.40579	6.45216e-08	3.76774e-07
COBS13469	46.0322	0.859382	0.220114	3.90426	9.45144e-05	0.000316217
COBS03875	44.6096	0.858899	0.148459	5.78541	7.23357e-09	5.03161e-08
COBS14503	8.45884	0.858652	0.211643	4.05708	4.96911e-05	0.000175986
COBS05035	213.463	0.857414	0.132671	6.46271	1.02844e-10	9.50948e-10
COBS15681	192.729	0.857377	0.132491	6.47122	9.72164e-11	9.02359e-10
COBS01111	18.6489	0.857172	0.18586	4.61192	3.98958e-06	1.72422e-05
COBS11512	73.0067	0.85656	0.119556	7.16448	7.80843e-13	1.0203e-11
COBS06632	1196.25	0.856248	0.0922481	9.28201	1.66305e-20	6.68767e-19
COBS16684	147.516	0.855718	0.209585	4.08291	4.44751e-05	0.000158948
COBS06791	101.624	0.855044	0.101654	8.41129	4.05515e-17	9.55659e-16
COBS01882	42.8799	0.854247	0.149425	5.71688	1.08496e-08	7.26494e-08
COBS13628	614.392	0.853833	0.126744	6.73668	1.62051e-11	1.71339e-10
COBS12963	56.6949	0.853675	0.116418	7.33287	2.25282e-13	3.14766e-12
COBS05761	65.9284	0.85341	0.134465	6.34673	2.19944e-10	1.94335e-09
COBS14228	44.0647	0.852641	0.194284	4.38862	1.1407e-05	4.54184e-05
COBS03989	62.7827	0.851883	0.142293	5.98684	2.13963e-09	1.61608e-08
COBS10039	11.5985	0.851518	0.192474	4.42406	9.68616e-06	3.90595e-05
COBS02506	149.923	0.851166	0.0991415	8.58536	9.05518e-18	2.38141e-16
COBS18375	23.8124	0.851133	0.162668	5.23233	1.67384e-07	9.14874e-07
COBS10591	98.379	0.850942	0.103021	8.25987	1.45832e-16	3.20278e-15
COBS12057	79.3118	0.850548	0.10865	7.82833	4.94399e-15	8.77407e-14
COBS19485	31.0201	0.850518	0.211909	4.0136	5.97997e-05	0.00020838
COBS14434	76.6407	0.850449	0.139624	6.09099	1.12212e-09	8.85318e-09
COBS17412	133.27	0.850146	0.105808	8.03483	9.37111e-16	1.81872e-14
COBS00652	43.4551	0.849866	0.111752	7.60491	2.85109e-14	4.52342e-13
COBS04486	11.3241	0.849758	0.213518	3.9798	6.89738e-05	0.000237554
COBS15564	10.3352	0.849582	0.218751	3.88379	0.00010284	0.0003421
COBS02537	385.88	0.848652	0.106664	7.95631	1.77244e-15	3.31152e-14
COBS10596	35.0757	0.848642	0.199193	4.2604	2.04059e-05	7.75275e-05
COBS01358	15.7165	0.84847	0.224305	3.78265	0.000155165	0.000498677
COBS01597	189.143	0.848184	0.10892	7.78724	6.84895e-15	1.18365e-13
COBS19624	52.4435	0.846451	0.18015	4.6986	2.61948e-06	1.17331e-05
COBS09708	209.964	0.84518	0.151188	5.59027	2.2672e-08	1.43349e-07
COBS19519	8.24341	0.845122	0.221683	3.81229	0.000137683	0.000447624
COBS17665	203.106	0.844875	0.124907	6.76404	1.34196e-11	1.43033e-10
COBS11178	563.522	0.842983	0.1364	6.18022	6.40138e-10	5.24429e-09
COBS02540	12.6261	0.841409	0.223932	3.75743	0.000171668	0.000547476
COBS01397	596.665	0.841328	0.0938053	8.96887	2.99573e-19	9.75092e-18
COBS01903	654.767	0.839458	0.129424	6.48612	8.80747e-11	8.23297e-10
COBS16575	132.697	0.839338	0.195036	4.3035	1.68123e-05	6.49797e-05
COBS02990	26.2186	0.838471	0.150829	5.55908	2.71197e-08	1.68751e-07
COBS02464	7.31494	0.838106	0.23349	3.58948	0.000331344	0.000996091
COBS18186	1108.52	0.838045	0.145203	5.77155	7.85437e-09	5.41672e-08
COBS07504	1407.21	0.838008	0.102006	8.21527	2.11693e-16	4.46678e-15
COBS10055	356.348	0.837688	0.112793	7.42677	1.11282e-13	1.62523e-12
COBS07818	110.318	0.836695	0.142477	5.87248	4.29332e-09	3.09618e-08
COBS11263	202.423	0.836559	0.173851	4.81194	1.49471e-06	6.99272e-06
COBS09892	42.5033	0.836415	0.124242	6.73217	1.67149e-11	1.75452e-10
COBS03650	9.09182	0.836046	0.218826	3.82059	0.000133132	0.000434309
COBS10760	210.435	0.835893	0.146412	5.70919	1.13514e-08	7.57297e-08
COBS14505	9.28495	0.834391	0.224005	3.72487	0.000195412	0.000616293
COBS12888	84.4507	0.83383	0.198011	4.21103	2.54213e-05	9.50155e-05
COBS02250	207.519	0.833685	0.101132	8.24352	1.67223e-16	3.61246e-15
COBS18805	239.305	0.833123	0.156092	5.33738	9.42985e-08	5.36836e-07
COBS18063	251.91	0.831848	0.146899	5.66272	1.4899e-08	9.69807e-08
COBS19029	622.632	0.831822	0.16919	4.9165	8.81047e-07	4.28481e-06
COBS07717	1094.14	0.831446	0.0858721	9.68238	3.58278e-22	1.94798e-20
COBS00174	361.362	0.830763	0.11533	7.20336	5.87448e-13	7.77391e-12
COBS06751	104.692	0.830713	0.169602	4.89802	9.68057e-07	4.67195e-06
COBS13610	39.5875	0.830011	0.166206	4.99386	5.91836e-07	2.9474e-06
COBS10677	83.2405	0.829032	0.151308	5.4791	4.27503e-08	2.57834e-07
COBS15965	232.379	0.829011	0.115475	7.17914	7.01518e-13	9.19128e-12
COBS15740	11.0423	0.828212	0.197868	4.18567	2.84322e-05	0.000105213
COBS16435	9.54767	0.828129	0.20523	4.03513	5.45718e-05	0.000191681
COBS11082	47.557	0.828096	0.109631	7.55349	4.23736e-14	6.53706e-13
COBS00240	81.9968	0.828094	0.165114	5.0153	5.29517e-07	2.66078e-06
COBS03766	17.7851	0.825815	0.188192	4.38815	1.14319e-05	4.54924e-05
COBS18264	7.28757	0.824553	0.227769	3.62013	0.000294454	0.000894638
COBS00756	30.2916	0.824303	0.208794	3.94793	7.88308e-05	0.000268572
COBS16179	10.5679	0.823835	0.204136	4.03572	5.44343e-05	0.000191293
COBS01847	344.663	0.823511	0.140921	5.84377	5.10317e-09	3.63151e-08
COBS08593	233.228	0.823476	0.106029	7.76653	8.0668e-15	1.38587e-13
COBS08614	187.176	0.823373	0.0989887	8.31785	8.95751e-17	2.01607e-15
COBS06453	1089.41	0.822411	0.126126	6.52054	7.00529e-11	6.63811e-10
COBS18280	281.606	0.821897	0.172206	4.77275	1.81725e-06	8.40429e-06
COBS01598	15.6829	0.819976	0.178133	4.60318	4.16095e-06	1.7903e-05
COBS09538	1171.99	0.819568	0.077507	10.5741	3.92863e-26	3.43566e-24
COBS07432	84.4917	0.819417	0.118171	6.93416	4.08629e-12	4.70425e-11
COBS17961	27.7993	0.819394	0.225056	3.64085	0.000271739	0.000831368
COBS11929	27.0367	0.818908	0.162081	5.05246	4.36156e-07	2.22398e-06
COBS13612	92.0076	0.818652	0.138191	5.92408	3.14051e-09	2.315e-08
COBS11355	111.833	0.818422	0.110061	7.43606	1.03733e-13	1.51803e-12
COBS00721	1868.82	0.818355	0.0996015	8.2163	2.09883e-16	4.44151e-15
COBS10035	173.736	0.818026	0.114541	7.14178	9.21307e-13	1.18255e-11
COBS19524	744.704	0.81795	0.137205	5.96151	2.4992e-09	1.86993e-08
COBS07338	28.5115	0.816926	0.1351	6.04684	1.47714e-09	1.14123e-08
COBS07807	27.7512	0.816221	0.188622	4.32728	1.50961e-05	5.86986e-05
COBS15966	59.0475	0.8155	0.198541	4.10746	4.00028e-05	0.00014412
COBS09614	674.525	0.815064	0.108094	7.54029	4.68915e-14	7.21106e-13
COBS01795	1054.04	0.814604	0.117913	6.90854	4.8965e-12	5.58386e-11
COBS01435	1196.32	0.813888	0.117467	6.92868	4.24793e-12	4.87103e-11
COBS05979	33.6711	0.812269	0.19056	4.26254	2.02118e-05	7.68706e-05
COBS09552	570.016	0.81084	0.124255	6.5256	6.77286e-11	6.44309e-10
COBS06231	125.658	0.810387	0.09051	8.95357	3.44172e-19	1.11277e-17
COBS07826	62.0223	0.809219	0.10652	7.59689	3.03323e-14	4.79667e-13
COBS11779	680.752	0.80869	0.104718	7.72254	1.1403e-14	1.92486e-13
COBS16405	26.8705	0.808467	0.138701	5.82883	5.58161e-09	3.94875e-08
COBS10593	35.4604	0.808095	0.180145	4.48581	7.26389e-06	2.98894e-05
COBS07781	502.125	0.807892	0.0688901	11.7273	9.23999e-32	1.83749e-29
COBS07456	276.776	0.807411	0.120858	6.68066	2.37862e-11	2.42489e-10
COBS16386	181.511	0.807401	0.0845851	9.54542	1.35555e-21	6.71621e-20
COBS02056	403.285	0.806993	0.0867613	9.30131	1.38731e-20	5.61085e-19
COBS01943	113.004	0.80515	0.132426	6.08001	1.20177e-09	9.42292e-09
COBS03710	43.5342	0.804975	0.195257	4.12264	3.74558e-05	0.000135582
COBS07886	1980.41	0.804831	0.10694	7.52598	5.23244e-14	7.99572e-13
COBS07733	130.947	0.804591	0.102511	7.84881	4.19987e-15	7.51831e-14
COBS10195	155.267	0.804477	0.155316	5.17962	2.22334e-07	1.19232e-06
COBS01628	333.785	0.80427	0.104288	7.71204	1.23827e-14	2.07575e-13
COBS15827	514.49	0.804265	0.166075	4.84277	1.2804e-06	6.05259e-06
COBS06000	42.3718	0.803553	0.17108	4.69695	2.64071e-06	1.18185e-05
COBS05368	164.964	0.803308	0.177351	4.52948	5.91282e-06	2.4751e-05
COBS05128	51.2999	0.803245	0.177904	4.51505	6.33008e-06	2.63457e-05
COBS00463	20.3859	0.802527	0.199784	4.01697	5.89507e-05	0.000205619
COBS15913	222.454	0.802115	0.180665	4.43978	9.00497e-06	3.64746e-05
COBS11585	76.7868	0.802043	0.0990417	8.09803	5.58541e-16	1.11378e-14
COBS11016	372.817	0.801666	0.13988	5.7311	9.97809e-09	6.7373e-08
COBS12557	295.719	0.801609	0.121856	6.57834	4.75724e-11	4.67575e-10
COBS17771	224.211	0.800795	0.133131	6.0151	1.79781e-09	1.3719e-08
COBS06969	10.5357	0.800743	0.214963	3.72503	0.00019529	0.000616042
COBS03683	329.318	0.800454	0.137729	5.8118	6.18058e-09	4.34076e-08
COBS10521	494.481	0.800153	0.140094	5.71152	1.11969e-08	7.48021e-08
COBS13870	7.97499	0.80014	0.209275	3.82339	0.00013163	0.000429891
COBS05631	60.0121	0.799178	0.145955	5.47551	4.36251e-08	2.62564e-07
COBS08613	86.7015	0.799152	0.149824	5.33396	9.60958e-08	5.46211e-07
COBS00413	161.678	0.799005	0.139494	5.72787	1.01702e-08	6.85109e-08
COBS13966	20.4931	0.798323	0.187019	4.26868	1.96633e-05	7.4902e-05
COBS05781	80.7535	0.79809	0.150217	5.31291	1.07887e-07	6.0823e-07
COBS04354	14.4539	0.797924	0.177744	4.48918	7.14964e-06	2.94694e-05
COBS02160	486.932	0.797495	0.121348	6.57199	4.96479e-11	4.86e-10
COBS02457	27.1219	0.796391	0.207102	3.84541	0.000120352	0.000396355
COBS00826	245.367	0.795619	0.156296	5.09046	3.572e-07	1.84668e-06
COBS16354	100.581	0.795237	0.121516	6.54429	5.97779e-11	5.73181e-10
COBS11387	175.141	0.794752	0.0947274	8.38989	4.86609e-17	1.13388e-15
COBS15604	19.4341	0.794212	0.178118	4.45892	8.23734e-06	3.35998e-05
COBS15225	1245.64	0.793693	0.0998522	7.94868	1.88515e-15	3.50856e-14
COBS04205	84.7232	0.792358	0.131459	6.02742	1.66598e-09	1.2776e-08
COBS19396	19.104	0.791918	0.197683	4.00599	6.17572e-05	0.000214635
COBS16388	27.4342	0.791782	0.181237	4.36878	1.24944e-05	4.93555e-05
COBS13915	177.646	0.791539	0.0853961	9.26903	1.87847e-20	7.47116e-19
COBS03712	128.587	0.790426	0.136075	5.80875	6.29394e-09	4.41396e-08
COBS12043	154.798	0.788807	0.169235	4.66102	3.14639e-06	1.38833e-05
COBS04866	17.0073	0.788244	0.195082	4.04058	5.33181e-05	0.000187687
COBS00444	46.2246	0.788133	0.169635	4.64604	3.38363e-06	1.48333e-05
COBS06901	535.659	0.787835	0.0947946	8.31097	9.49232e-17	2.12327e-15
COBS15728	52.2027	0.787796	0.153861	5.12017	3.05261e-07	1.59923e-06
COBS07116	53.9298	0.787775	0.152191	5.17623	2.26416e-07	1.21243e-06
COBS03061	55.3198	0.787562	0.0969413	8.12411	4.50648e-16	9.0736e-15
COBS14550	60.627	0.786932	0.14206	5.53942	3.03478e-08	1.87472e-07
COBS08930	143.154	0.786138	0.113034	6.95486	3.52925e-12	4.11519e-11
COBS00859	41.2573	0.785859	0.118891	6.60993	3.84506e-11	3.83371e-10
COBS00865	65.1084	0.785225	0.133274	5.89182	3.8197e-09	2.77948e-08
COBS18842	43.1411	0.784568	0.153829	5.10025	3.39196e-07	1.76113e-06
COBS08495	195.153	0.784144	0.105146	7.45767	8.80678e-14	1.30191e-12
COBS10078	17.4748	0.7836	0.171208	4.57688	4.71967e-06	2.0122e-05
COBS18510	15.4128	0.783559	0.191652	4.08844	4.34282e-05	0.000155551
COBS16622	9.73458	0.783359	0.195436	4.00826	6.11671e-05	0.000212737
COBS08552	160.852	0.783122	0.151827	5.158	2.49601e-07	1.32776e-06
COBS16154	1076.19	0.782763	0.151238	5.17571	2.27044e-07	1.21534e-06
COBS05294	28.1327	0.782395	0.133163	5.87549	4.21602e-09	3.048e-08
COBS10509	23.3697	0.782	0.208049	3.75872	0.000170782	0.000545247
COBS07149	39.8135	0.781912	0.204063	3.83172	0.00012725	0.000416431
COBS19555	340.751	0.781705	0.116931	6.6852	2.30617e-11	2.35599e-10
COBS13744	401.278	0.78109	0.0805285	9.69954	3.02858e-22	1.65909e-20
COBS02074	614.049	0.780782	0.124601	6.26627	3.69794e-10	3.14487e-09
COBS06868	14.3882	0.780152	0.192322	4.05648	4.98177e-05	0.000176391
COBS04362	990.59	0.779762	0.121402	6.423	1.33612e-10	1.21608e-09
COBS15045	224.576	0.778754	0.0881386	8.83556	9.96006e-19	3.0249e-17
COBS11337	107.863	0.778147	0.112743	6.90198	5.12821e-12	5.82066e-11
COBS07393	11.713	0.778134	0.211983	3.67073	0.000241857	0.000748941
COBS05993	123.413	0.778093	0.172948	4.49899	6.8278e-06	2.82632e-05
COBS15222	71.6623	0.777485	0.136283	5.70494	1.16385e-08	7.7467e-08
COBS08084	91.5957	0.777147	0.146708	5.29723	1.17574e-07	6.59262e-07
COBS13619	123.981	0.776329	0.127145	6.10583	1.02265e-09	8.12582e-09
COBS14924	252.322	0.775087	0.0722342	10.7302	7.34364e-27	7.35057e-25
COBS18085	158.101	0.77445	0.115325	6.7154	1.87552e-11	1.94756e-10
COBS01920	33.9929	0.773137	0.20252	3.81759	0.000134762	0.000439033
COBS14181	314.228	0.773002	0.103084	7.49877	6.44174e-14	9.71077e-13
COBS01753	1037.97	0.77288	0.0849739	9.0955	9.415e-20	3.30938e-18
COBS14922	25.4819	0.771982	0.153686	5.02309	5.08455e-07	2.56382e-06
COBS11947	181.67	0.771741	0.0815708	9.461	3.05006e-21	1.41462e-19
COBS05877	158.666	0.770575	0.104541	7.37104	1.69308e-13	2.40965e-12
COBS14560	12.7254	0.769936	0.174205	4.4197	9.88372e-06	3.97787e-05
COBS03522	339.485	0.769824	0.133179	5.78036	7.45392e-09	5.16509e-08
COBS13941	1003.78	0.769795	0.1184	6.50167	7.94328e-11	7.48297e-10
COBS10758	13593.9	0.769777	0.127978	6.01492	1.79971e-09	1.37219e-08
COBS13771	264.314	0.769274	0.159538	4.82187	1.42216e-06	6.67489e-06
COBS13857	728.367	0.769216	0.13473	5.70931	1.13438e-08	7.5714e-08
COBS14800	81.8805	0.768648	0.181157	4.24299	2.20561e-05	8.32955e-05
COBS08679	360.983	0.768431	0.0727667	10.5602	4.55643e-26	3.93725e-24
COBS00042	165.581	0.767921	0.128607	5.97109	2.35675e-09	1.76994e-08
COBS05998	58.0237	0.767452	0.120676	6.35959	2.02294e-10	1.80166e-09
COBS01477	383.635	0.766227	0.0848376	9.03169	1.69046e-19	5.64148e-18
COBS14554	26.7854	0.766015	0.190815	4.01444	5.95881e-05	0.000207714
COBS18760	27.4516	0.76517	0.179568	4.26116	2.03368e-05	7.73054e-05
COBS04927	62.5378	0.764988	0.145096	5.27229	1.34728e-07	7.46794e-07
COBS13308	25.9256	0.764404	0.203249	3.76093	0.000169282	0.000540696
COBS12059	235.36	0.764018	0.0948929	8.05136	8.18763e-16	1.59973e-14
COBS09890	20.2939	0.764012	0.140944	5.4207	5.93664e-08	3.48775e-07
COBS10971	65.1833	0.763848	0.212319	3.59765	0.000321109	0.000968733
COBS16032	74.743	0.763642	0.169592	4.50282	6.70565e-06	2.77734e-05
COBS01493	103.606	0.763169	0.115696	6.59633	4.21466e-11	4.16219e-10
COBS02157	16.8589	0.762921	0.174429	4.37381	1.22097e-05	4.83228e-05
COBS01445	7724.43	0.762385	0.107516	7.09091	1.33234e-12	1.65312e-11
COBS19053	141.968	0.76172	0.101739	7.48702	7.04556e-14	1.05662e-12
COBS07740	14.5594	0.761129	0.166262	4.57789	4.69689e-06	2.00366e-05
COBS09460	37.1199	0.760855	0.178671	4.25841	2.05885e-05	7.80985e-05
COBS11341	597.577	0.760752	0.0872334	8.72088	2.76051e-18	7.81176e-17
COBS16485	720.974	0.760629	0.106467	7.14424	9.04962e-13	1.16363e-11
COBS08956	135.609	0.759945	0.182198	4.17097	3.03304e-05	0.000111825
COBS09132	1777.29	0.759824	0.0796174	9.54344	1.38169e-21	6.79932e-20
COBS01233	13.746	0.759492	0.200241	3.79288	0.000148909	0.000480715
COBS06748	264.946	0.758636	0.200797	3.77813	0.000158008	0.000507142
COBS11155	578.642	0.758215	0.0892724	8.49328	2.00893e-17	4.97672e-16
COBS10072	543.393	0.7574	0.127459	5.94228	2.81077e-09	2.08609e-08
COBS00130	985.244	0.757154	0.102527	7.38491	1.52561e-13	2.17985e-12
COBS03039	2211.17	0.757108	0.111925	6.76442	1.33847e-11	1.42769e-10
COBS06073	20.6438	0.755934	0.203081	3.72233	0.000197391	0.000621467
COBS14599	257.312	0.755914	0.0904897	8.3536	6.6215e-17	1.52578e-15
COBS04080	204.519	0.755394	0.149005	5.06958	3.98698e-07	2.04591e-06
COBS16526	20.2432	0.754646	0.18969	3.97832	6.94037e-05	0.000238809
COBS19756	67.6835	0.754399	0.160673	4.69525	2.66276e-06	1.19013e-05
COBS12644	18.7709	0.754148	0.187189	4.0288	5.60622e-05	0.000196488
COBS02714	118.147	0.753587	0.11238	6.70571	2.00424e-11	2.06381e-10
COBS07523	180.695	0.752968	0.11879	6.33862	2.31826e-10	2.04089e-09
COBS15781	380.113	0.750906	0.102267	7.34259	2.09494e-13	2.94978e-12
COBS16741	14.1851	0.750481	0.204817	3.66416	0.000248153	0.000766639
COBS11468	61.5938	0.750398	0.188088	3.98961	6.61811e-05	0.000228914
COBS05509	252.886	0.750272	0.131903	5.68807	1.28483e-08	8.47042e-08
COBS03026	132.141	0.7495	0.141012	5.31517	1.0656e-07	6.01682e-07
COBS05004	860.034	0.748814	0.117916	6.3504	2.14754e-10	1.90097e-09
COBS06234	472.382	0.748755	0.0785672	9.53012	1.571e-21	7.65307e-20
COBS17654	300.833	0.748392	0.176469	4.24093	2.226e-05	8.39781e-05
COBS10653	105.59	0.748151	0.114234	6.54931	5.78033e-11	5.57562e-10
COBS07313	665.989	0.747594	0.111147	6.72616	1.74195e-11	1.82189e-10
COBS12642	1002.76	0.747213	0.113373	6.59072	4.37689e-11	4.31653e-10
COBS16040	135.336	0.746842	0.0920692	8.11175	4.98974e-16	1.00188e-14
COBS01734	1038.01	0.746812	0.0970645	7.69398	1.4263e-14	2.36095e-13
COBS10012	229.853	0.746159	0.113256	6.58824	4.45061e-11	4.38626e-10
COBS13253	64.2568	0.745695	0.14551	5.12471	2.97996e-07	1.564e-06
COBS12611	410.257	0.745456	0.106315	7.01178	2.35306e-12	2.8161e-11
COBS09694	536.951	0.745077	0.0973534	7.65332	1.9585e-14	3.19815e-13
COBS13283	42.8058	0.744088	0.132215	5.62786	1.82459e-08	1.17305e-07
COBS00301	93.7728	0.744039	0.129714	5.73598	9.6949e-09	6.57361e-08
COBS13524	1620.77	0.743951	0.127868	5.81812	5.9514e-09	4.20012e-08
COBS03375	95.4752	0.743918	0.132558	5.61201	1.99986e-08	1.27613e-07
COBS08756	36.0595	0.743898	0.160264	4.6417	3.45553e-06	1.51233e-05
COBS19787	63.9091	0.743459	0.122041	6.09187	1.11596e-09	8.81782e-09
COBS04934	35.3934	0.743307	0.125028	5.94511	2.76276e-09	2.05466e-08
COBS17012	86.9259	0.743152	0.110598	6.71943	1.82442e-11	1.89993e-10
COBS19457	477.846	0.743124	0.121541	6.11417	9.70605e-10	7.72916e-09
COBS01948	104.466	0.741712	0.130024	5.70442	1.16742e-08	7.76692e-08
COBS01867	29.4579	0.741521	0.17831	4.15861	3.20188e-05	0.000117467
COBS10397	268.044	0.741512	0.188335	3.93719	8.24416e-05	0.000279758
COBS03070	539.831	0.741266	0.0623742	11.8842	1.43025e-32	3.14589e-30
COBS00078	147.815	0.740946	0.201244	3.68183	0.00023157	0.000720157
COBS08561	109.397	0.740932	0.124257	5.96289	2.4782e-09	1.85539e-08
COBS13143	91.7581	0.740686	0.114629	6.46158	1.03614e-10	9.56849e-10
COBS10659	80.3798	0.739739	0.148136	4.99365	5.92491e-07	2.94966e-06
COBS09664	19.1598	0.739586	0.169055	4.37483	1.21526e-05	4.81098e-05
COBS06760	45.3639	0.739488	0.170793	4.32972	1.49297e-05	5.81069e-05
COBS00443	23.0029	0.739217	0.160919	4.59371	4.35441e-06	1.86855e-05
COBS05801	1933.54	0.738951	0.108497	6.81081	9.70482e-12	1.05769e-10
COBS06076	164.53	0.738529	0.0913924	8.08086	6.43131e-16	1.27895e-14
COBS01440	391.536	0.7378	0.154939	4.76187	1.9181e-06	8.82571e-06
COBS08204	41.8023	0.737421	0.146626	5.02926	4.92366e-07	2.48701e-06
COBS07828	130.515	0.737414	0.163593	4.50761	6.55618e-06	2.72087e-05
COBS16634	88.8481	0.737068	0.164739	4.47417	7.67096e-06	3.14397e-05
COBS17250	40.6963	0.736943	0.136527	5.3978	6.7464e-08	3.92064e-07
COBS00045	90.9463	0.735469	0.183207	4.01441	5.95943e-05	0.000207714
COBS11443	968.454	0.732657	0.0990075	7.40002	1.36169e-13	1.96693e-12
COBS08965	66.4972	0.732641	0.131151	5.58625	2.32019e-08	1.46253e-07
COBS14561	53.9424	0.731784	0.150793	4.85289	1.21675e-06	5.78184e-06
COBS08728	11.8904	0.730144	0.190513	3.83252	0.000126837	0.000415362
COBS07292	21.982	0.729629	0.151873	4.8042	1.55373e-06	7.25258e-06
COBS06226	383.646	0.729442	0.102893	7.08936	1.34735e-12	1.67032e-11
COBS15364	423.541	0.729351	0.0856955	8.51096	1.72502e-17	4.32505e-16
COBS10242	511.936	0.728459	0.12908	5.64346	1.6667e-08	1.07535e-07
COBS02493	175.601	0.72832	0.161984	4.49625	6.91629e-06	2.85888e-05
COBS03408	53.9109	0.72806	0.143222	5.08343	3.7068e-07	1.91092e-06
COBS16745	494.924	0.727545	0.0638567	11.3934	4.51048e-30	6.6815e-28
COBS03874	159.743	0.727169	0.1903	3.82118	0.000132817	0.000433477
COBS03978	37.6495	0.725965	0.139027	5.22177	1.77221e-07	9.63927e-07
COBS01159	50.7725	0.724922	0.141139	5.13622	2.80316e-07	1.4803e-06
COBS05367	524.312	0.724324	0.0877937	8.2503	1.58001e-16	3.42854e-15
COBS17926	1090.81	0.722043	0.135357	5.33436	9.58844e-08	5.45223e-07
COBS06873	250.007	0.720121	0.13224	5.44555	5.16449e-08	3.06262e-07
COBS05467	276.426	0.720044	0.11673	6.16847	6.89539e-10	5.6173e-09
COBS14927	101.739	0.719528	0.119292	6.03165	1.62296e-09	1.24791e-08
COBS10611	24.047	0.719322	0.133621	5.3833	7.31343e-08	4.22816e-07
COBS09351	744.327	0.719242	0.18911	3.8033	0.000142781	0.000462873
COBS07100	39.7782	0.718861	0.11998	5.99149	2.07928e-09	1.57213e-08
COBS02096	849.014	0.718616	0.109793	6.54519	5.9418e-11	5.70483e-10
COBS19007	34.6897	0.718574	0.141022	5.09548	3.47861e-07	1.80289e-06
COBS01911	285.861	0.718564	0.139542	5.14944	2.61264e-07	1.38574e-06
COBS11499	36.5189	0.718041	0.168625	4.25822	2.06064e-05	7.8146e-05
COBS15232	164.054	0.717214	0.126361	5.6759	1.3796e-08	9.04184e-08
COBS10727	56.4335	0.716472	0.169525	4.22634	2.37524e-05	8.92606e-05
COBS08145	88.2184	0.71632	0.164982	4.3418	1.41321e-05	5.53352e-05
COBS06030	45.5432	0.716235	0.105773	6.77146	1.27488e-11	1.36586e-10
COBS08342	776.859	0.716076	0.097912	7.31347	2.60337e-13	3.62003e-12
COBS09364	367.794	0.713876	0.198627	3.59406	0.000325569	0.000980761
COBS17676	931.893	0.713396	0.0974261	7.32243	2.4352e-13	3.39595e-12
COBS09761	22.9813	0.71262	0.198366	3.59245	0.00032759	0.00098603
COBS07618	1050.97	0.711397	0.103867	6.8491	7.43167e-12	8.25327e-11
COBS18920	27.8082	0.711161	0.174082	4.08521	4.40369e-05	0.000157614
COBS17558	220.727	0.710614	0.108444	6.55281	5.64629e-11	5.46083e-10
COBS09178	78.7843	0.709998	0.148644	4.77652	1.78359e-06	8.26177e-06
COBS01154	151.412	0.709633	0.0915875	7.74814	9.32458e-15	1.58879e-13
COBS05956	45.5568	0.708438	0.172025	4.11823	3.81802e-05	0.000138013
COBS15608	34.7574	0.707889	0.175406	4.03572	5.44349e-05	0.000191293
COBS12930	39.8473	0.707794	0.136187	5.19724	2.02267e-07	1.08954e-06
COBS16735	44.4243	0.707486	0.150967	4.68637	2.78087e-06	1.23948e-05
COBS06493	32.4018	0.707359	0.137812	5.13279	2.85473e-07	1.50371e-06
COBS18569	31.0497	0.707144	0.150918	4.68561	2.79122e-06	1.24333e-05
COBS02763	23.7391	0.706816	0.15953	4.4306	9.39704e-06	3.79779e-05
COBS00168	22.1689	0.706492	0.177221	3.98651	6.70515e-05	0.000231648
COBS11977	109.706	0.705994	0.133554	5.2862	1.24885e-07	6.95418e-07
COBS15317	47.7947	0.705903	0.139363	5.0652	4.07979e-07	2.09132e-06
COBS07046	19.0096	0.705845	0.160206	4.40586	1.05367e-05	4.21632e-05
COBS12304	799.799	0.705341	0.0958305	7.3603	1.835e-13	2.60398e-12
COBS07519	126.239	0.704041	0.118548	5.93886	2.87009e-09	2.12577e-08
COBS03927	526.143	0.703977	0.108347	6.49742	8.171e-11	7.6726e-10
COBS13972	55.4052	0.703858	0.150716	4.67009	3.01062e-06	1.3337e-05
COBS06553	224.766	0.70385	0.106643	6.60004	4.11053e-11	4.08157e-10
COBS13596	261.87	0.703825	0.111334	6.32172	2.58667e-10	2.25528e-09
COBS10031	425.576	0.70375	0.142771	4.92922	8.25568e-07	4.04125e-06
COBS14792	809.34	0.70345	0.0854524	8.23207	1.84001e-16	3.93091e-15
COBS13410	1346.9	0.702827	0.111834	6.28453	3.28839e-10	2.81804e-09
COBS02449	172.514	0.702739	0.149152	4.71158	2.45806e-06	1.1075e-05
COBS09420	46.6003	0.702591	0.116887	6.01088	1.84518e-09	1.40391e-08
COBS06754	190.378	0.702263	0.134817	5.20899	1.89874e-07	1.02774e-06
COBS17193	157.089	0.701858	0.102948	6.81761	9.25671e-12	1.01283e-10
COBS02865	579.217	0.701262	0.132531	5.29132	1.21438e-07	6.77786e-07
COBS04867	27.6237	0.70084	0.178064	3.93588	8.28925e-05	0.000281091
COBS08948	795.815	0.700274	0.137058	5.10933	3.23295e-07	1.6852e-06
COBS03861	49.4386	0.699757	0.13875	5.04329	4.57602e-07	2.32354e-06
COBS12978	102.419	0.699571	0.10919	6.40694	1.48472e-10	1.34041e-09
COBS06507	349.736	0.699031	0.0903973	7.73288	1.05142e-14	1.78104e-13
COBS05846	2779.66	0.698514	0.0818278	8.53639	1.38478e-17	3.533e-16
COBS02751	49.3835	0.697911	0.144645	4.825	1.40002e-06	6.58165e-06
COBS19038	173.508	0.697807	0.186438	3.74284	0.000181951	0.000577478
COBS02264	1195.59	0.697216	0.0893461	7.80354	6.0192e-15	1.04773e-13
COBS06442	404.473	0.697142	0.0660336	10.5574	4.69607e-26	4.0339e-24
COBS02924	44.1446	0.696743	0.154642	4.50551	6.62128e-06	2.74475e-05
COBS01928	32.4528	0.696122	0.142309	4.89161	1.00013e-06	4.81497e-06
COBS03623	551.688	0.69603	0.118139	5.89162	3.82416e-09	2.78133e-08
COBS06704	70.3461	0.695904	0.180498	3.85545	0.000115515	0.000381557
COBS09777	28.1903	0.695284	0.191011	3.64002	0.00027262	0.000833885
COBS05837	151.77	0.694957	0.162531	4.27584	1.90414e-05	7.28386e-05
COBS16828	104.065	0.694911	0.122883	5.65505	1.55797e-08	1.01014e-07
COBS15545	64.4823	0.69425	0.115399	6.01608	1.78693e-09	1.36459e-08
COBS00434	1643.69	0.693933	0.110554	6.27689	3.4542e-10	2.95142e-09
COBS17852	109.801	0.693507	0.152126	4.55878	5.14528e-06	2.17703e-05
COBS09195	618.609	0.693239	0.0832199	8.33021	8.06977e-17	1.83045e-15
COBS08143	797.155	0.693079	0.11815	5.8661	4.46153e-09	3.20475e-08
COBS02841	54.0945	0.692924	0.15432	4.49018	7.1164e-06	2.93574e-05
COBS07757	178.005	0.692779	0.120179	5.76458	8.18612e-09	5.62946e-08
COBS07638	35.056	0.692376	0.129873	5.33117	9.75833e-08	5.54449e-07
COBS16470	452.062	0.691997	0.142695	4.84949	1.23781e-06	5.8723e-06
COBS03002	25.1175	0.691399	0.180122	3.83851	0.000123782	0.000406363
COBS02486	52.9943	0.691365	0.174481	3.9624	7.41986e-05	0.000254283
COBS14295	268.952	0.69083	0.120131	5.75064	8.89087e-09	6.07097e-08
COBS10178	316.908	0.690672	0.155862	4.43131	9.3661e-06	3.78845e-05
COBS04081	83.7811	0.690401	0.111985	6.16511	7.04356e-10	5.72837e-09
COBS10747	113.13	0.688949	0.148958	4.62511	3.74396e-06	1.62923e-05
COBS17118	552.516	0.688216	0.102728	6.69937	2.09316e-11	2.14745e-10
COBS09893	26.2798	0.687931	0.13226	5.20136	1.97833e-07	1.06883e-06
COBS01596	1385.43	0.686295	0.186152	3.68674	0.000227147	0.000708375
COBS05698	508.608	0.686247	0.0756395	9.0726	1.16206e-19	4.00703e-18
COBS05645	13.2231	0.686102	0.175434	3.91089	9.19568e-05	0.000308584
COBS04961	39.5334	0.68595	0.137677	4.98232	6.28255e-07	3.12128e-06
COBS01719	653.076	0.685797	0.0824205	8.32071	8.74369e-17	1.971e-15
COBS17084	1475.59	0.685729	0.116218	5.90034	3.62743e-09	2.65153e-08
COBS02004	51.2965	0.684771	0.129264	5.29748	1.1741e-07	6.58593e-07
COBS04609	638.568	0.6827	0.11116	6.14159	8.17013e-10	6.57824e-09
COBS02054	846.9	0.682294	0.132029	5.16777	2.36907e-07	1.2644e-06
COBS10736	740.858	0.679645	0.127563	5.32791	9.93489e-08	5.63819e-07
COBS10849	240.66	0.679107	0.104127	6.52192	6.94146e-11	6.58622e-10
COBS15208	28.453	0.678956	0.149775	4.53317	5.81043e-06	2.43575e-05
COBS03932	725.714	0.67885	0.0993649	6.83189	8.3801e-12	9.22319e-11
COBS11267	928.471	0.678774	0.103193	6.57774	4.77641e-11	4.68825e-10
COBS04091	66.2724	0.678338	0.0952574	7.1211	1.07069e-12	1.35511e-11
COBS01864	1364.12	0.678201	0.151412	4.47919	7.49275e-06	3.07701e-05
COBS18759	318.402	0.677358	0.128718	5.26234	1.42232e-07	7.85384e-07
COBS16579	468.168	0.676955	0.130934	5.17021	2.33834e-07	1.24984e-06
COBS11416	152.802	0.67677	0.156109	4.33525	1.45598e-05	5.68641e-05
COBS10068	1607.64	0.676502	0.0781952	8.65145	5.0849e-18	1.38755e-16
COBS09314	2221.52	0.675795	0.0719713	9.38978	6.01232e-21	2.64488e-19
COBS00821	34.7111	0.675716	0.130844	5.16428	2.41371e-07	1.28587e-06
COBS14290	400.781	0.674952	0.0932038	7.24168	4.43155e-13	6.01242e-12
COBS08468	39.1687	0.674952	0.137597	4.90529	9.32902e-07	4.5113e-06
COBS15290	989.998	0.674777	0.111153	6.07072	1.27338e-09	9.93851e-09
COBS00063	175.29	0.673821	0.0953341	7.068	1.57185e-12	1.924e-11
COBS17876	96.2267	0.673216	0.134592	5.00189	5.67712e-07	2.83797e-06
COBS06946	30.9682	0.67268	0.17109	3.93173	8.43368e-05	0.000285655
COBS10488	54.3312	0.672523	0.122887	5.47271	4.43194e-08	2.65862e-07
COBS10770	161.261	0.672467	0.153254	4.38791	1.14445e-05	4.55301e-05
COBS09728	2881.4	0.672228	0.0654038	10.2781	8.84445e-25	6.61829e-23
COBS09101	222.16	0.670909	0.166274	4.03496	5.46114e-05	0.000191681
COBS04705	70.893	0.670379	0.139774	4.79615	1.61744e-06	7.5306e-06
COBS14031	456.822	0.670355	0.122284	5.48195	4.20663e-08	2.54025e-07
COBS11496	90.0388	0.66884	0.143382	4.66475	3.08996e-06	1.36551e-05
COBS09453	27.1449	0.668716	0.156612	4.26989	1.95569e-05	7.45557e-05
COBS05727	26.8337	0.666192	0.173027	3.85022	0.00011801	0.000388822
COBS15599	171.443	0.665845	0.101326	6.57129	4.98815e-11	4.87958e-10
COBS10092	59.5287	0.665732	0.179658	3.70555	0.000210932	0.000660933
COBS10761	166.809	0.665594	0.151977	4.37956	1.18919e-05	4.71936e-05
COBS03294	68.0012	0.664771	0.105432	6.3052	2.87813e-10	2.48998e-09
COBS10705	19.4016	0.664004	0.161162	4.1201	3.78703e-05	0.000136961
COBS00333	770.426	0.663309	0.0824531	8.04468	8.64693e-16	1.68267e-14
COBS11668	137.429	0.663299	0.116265	5.70509	1.16285e-08	7.74362e-08
COBS00325	121.561	0.662502	0.133686	4.95566	7.20866e-07	3.55825e-06
COBS03482	405.32	0.662411	0.142492	4.64877	3.33928e-06	1.46587e-05
COBS07082	398.446	0.662168	0.155924	4.24673	2.16912e-05	8.20029e-05
COBS18696	43.1264	0.661472	0.155176	4.26273	2.01948e-05	7.68258e-05
COBS13252	28.0419	0.661338	0.176525	3.74643	0.000179366	0.000570272
COBS12116	2087.49	0.661323	0.0685447	9.64805	5.01014e-22	2.64481e-20
COBS06797	38.0342	0.661124	0.12004	5.50752	3.63929e-08	2.22168e-07
COBS00442	98.3428	0.66095	0.12425	5.31953	1.04035e-07	5.88344e-07
COBS12117	33.3658	0.660649	0.164331	4.02022	5.81438e-05	0.000203049
COBS18315	192.911	0.66042	0.0645691	10.2281	1.48387e-24	1.07171e-22
COBS17588	92.2183	0.660401	0.160632	4.11126	3.93507e-05	0.000141927
COBS10765	594.549	0.659173	0.129756	5.08011	3.77223e-07	1.94327e-06
COBS01396	1767.05	0.659028	0.0857295	7.6873	1.50275e-14	2.47902e-13
COBS08567	43.7898	0.658999	0.139126	4.73671	2.17213e-06	9.88797e-06
COBS08717	328.302	0.658636	0.100256	6.56952	5.04787e-11	4.93468e-10
COBS02916	267.572	0.657823	0.0854235	7.70073	1.35294e-14	2.24978e-13
COBS00983	603.469	0.657792	0.121747	5.40295	6.55532e-08	3.82337e-07
COBS07297	711.235	0.657449	0.105834	6.21206	5.22933e-10	4.35039e-09
COBS15962	34.4018	0.656665	0.150044	4.3765	1.20602e-05	4.77701e-05
COBS10326	88.875	0.656282	0.137807	4.76233	1.9137e-06	8.81385e-06
COBS13918	630.198	0.655984	0.109359	5.99843	1.99232e-09	1.50795e-08
COBS02604	51.7651	0.655446	0.145868	4.49342	7.00882e-06	2.893e-05
COBS12016	37.9389	0.655001	0.172362	3.80015	0.000144607	0.000468586
COBS08570	56.5212	0.654012	0.165714	3.94663	7.92575e-05	0.000269963
COBS06230	337.248	0.653789	0.151494	4.31561	1.59166e-05	6.16823e-05
COBS01390	134.399	0.653778	0.146314	4.46831	7.88383e-06	3.22393e-05
COBS06781	156.273	0.653055	0.143896	4.53839	5.66843e-06	2.37966e-05
COBS14574	153.481	0.652988	0.142811	4.57238	4.82217e-06	2.05168e-05
COBS05947	39.4726	0.652755	0.1721	3.79287	0.000148913	0.000480715
COBS11502	52.8606	0.651478	0.153769	4.23673	2.26798e-05	8.5451e-05
COBS16728	1556.09	0.651064	0.0906425	7.18276	6.83155e-13	8.96688e-12
COBS18137	108.088	0.650415	0.125934	5.16474	2.4077e-07	1.28349e-06
COBS16420	653.37	0.648534	0.0787901	8.23115	1.85419e-16	3.94682e-15
COBS00232	449.574	0.648439	0.138405	4.68507	2.79861e-06	1.24624e-05
COBS17064	1196.02	0.648391	0.109824	5.90393	3.54944e-09	2.59976e-08
COBS15234	602.186	0.648189	0.151859	4.26836	1.96918e-05	7.49909e-05
COBS01005	47.1225	0.647565	0.148769	4.35283	1.34391e-05	5.28283e-05
COBS19565	14.9155	0.647499	0.166502	3.88884	0.000100723	0.000335828
COBS06268	182.446	0.646284	0.126866	5.09423	3.50165e-07	1.81234e-06
COBS01189	245.156	0.645883	0.113525	5.68935	1.27521e-08	8.41084e-08
COBS06241	73.6138	0.645556	0.148226	4.35521	1.32941e-05	5.23016e-05
COBS02743	76.502	0.643995	0.155572	4.13953	3.48011e-05	0.000126905
COBS15685	161.04	0.643422	0.108315	5.9403	2.84506e-09	2.10831e-08
COBS15888	308.831	0.643186	0.100184	6.42002	1.36256e-10	1.23781e-09
COBS13278	319.61	0.643079	0.0782057	8.22292	1.98616e-16	4.2092e-15
COBS06135	1356.23	0.642682	0.0986825	6.51263	7.38474e-11	6.97037e-10
COBS01823	970.297	0.641943	0.0847558	7.57404	3.61801e-14	5.64154e-13
COBS03416	192.972	0.641583	0.130475	4.91728	8.77556e-07	4.27069e-06
COBS10243	1089.05	0.641411	0.101445	6.32273	2.56981e-10	2.24329e-09
COBS07454	40.1861	0.640916	0.151699	4.22492	2.39028e-05	8.97795e-05
COBS11908	43.6182	0.640746	0.132401	4.83944	1.30208e-06	6.1491e-06
COBS01944	85.1085	0.640116	0.134422	4.76199	1.9169e-06	8.82295e-06
COBS00965	35.036	0.639969	0.137174	4.66537	3.08056e-06	1.36177e-05
COBS06227	971.711	0.639639	0.13305	4.80751	1.52824e-06	7.13819e-06
COBS11800	20.4065	0.638087	0.176494	3.61535	0.000299942	0.000910552
COBS17190	336.063	0.636916	0.124544	5.11398	3.15435e-07	1.64718e-06
COBS06858	18.8091	0.636798	0.16527	3.85308	0.000116641	0.000384748
COBS07290	39.9296	0.636672	0.140596	4.52837	5.94413e-06	2.48606e-05
COBS13701	78.0066	0.636169	0.176756	3.59913	0.000319286	0.000964188
COBS17605	252.87	0.636128	0.103779	6.12966	8.8068e-10	7.06735e-09
COBS06500	363.97	0.635474	0.091449	6.94894	3.68044e-12	4.26749e-11
COBS06393	1098.38	0.635212	0.108276	5.86658	4.44875e-09	3.19715e-08
COBS19685	129.92	0.633539	0.149005	4.25181	2.12048e-05	8.02917e-05
COBS10969	76.0816	0.632788	0.134766	4.69547	2.65999e-06	1.18926e-05
COBS15689	1278.67	0.632534	0.119779	5.28084	1.28595e-07	7.14707e-07
COBS02851	135.094	0.631956	0.158651	3.98332	6.79588e-05	0.000234448
COBS07355	47.8563	0.631623	0.147728	4.27559	1.90629e-05	7.28638e-05
COBS15496	266.24	0.631263	0.0750259	8.41394	3.96474e-17	9.35872e-16
COBS13299	46.2975	0.631196	0.155756	4.05247	5.06803e-05	0.000179227
COBS13579	92.6847	0.630919	0.169427	3.72384	0.000196212	0.000618277
COBS10366	289.073	0.63015	0.129193	4.87757	1.07399e-06	5.14727e-06
COBS08239	177.639	0.629593	0.113244	5.55959	2.70407e-08	1.68332e-07
COBS06250	34.3921	0.629413	0.142346	4.4217	9.79272e-06	3.94672e-05
COBS03926	86.7774	0.629094	0.101433	6.20206	5.57278e-10	4.60969e-09
COBS14452	86.3432	0.628872	0.162241	3.87616	0.000106118	0.00035244
COBS10137	117.148	0.628651	0.0943564	6.66252	2.69172e-11	2.72875e-10
COBS14056	25.3019	0.628181	0.171797	3.65653	0.000255651	0.000786622
COBS02753	2601.76	0.627186	0.100537	6.23838	4.42121e-10	3.7229e-09
COBS00345	466.114	0.62654	0.131899	4.75016	2.03251e-06	9.30788e-06
COBS16677	179.142	0.625835	0.149285	4.19222	2.76242e-05	0.000102379
COBS10916	1568.88	0.625625	0.0679687	9.20461	3.42912e-20	1.31001e-18
COBS15437	83.9289	0.625254	0.170639	3.6642	0.00024811	0.000766639
COBS11505	197.315	0.625155	0.159424	3.92134	8.80582e-05	0.000297012
COBS09981	204.753	0.624956	0.0810923	7.70673	1.29087e-14	2.15397e-13
COBS06508	94.2638	0.624389	0.114362	5.45977	4.76756e-08	2.84454e-07
COBS15990	76.1428	0.624225	0.115974	5.38245	7.34771e-08	4.24628e-07
COBS04805	84.173	0.623332	0.113623	5.48595	4.11243e-08	2.48958e-07
COBS16105	287.3	0.62307	0.116126	5.36547	8.07389e-08	4.64193e-07
COBS10069	576.269	0.622878	0.0665953	9.35317	8.50572e-21	3.56871e-19
COBS07786	823.249	0.622832	0.0860702	7.23632	4.61011e-13	6.23138e-12
COBS06769	81.3056	0.622129	0.0877733	7.08791	1.36155e-12	1.68649e-11
COBS08755	129.268	0.621519	0.146165	4.25217	2.11707e-05	8.02021e-05
COBS06839	315.817	0.621161	0.143784	4.32011	1.55953e-05	6.05017e-05
COBS03493	62.1191	0.620861	0.15021	4.13329	3.57603e-05	0.000130174
COBS08083	89.8535	0.620733	0.130206	4.76732	1.86694e-06	8.61212e-06
COBS18491	41.2871	0.620351	0.130406	4.75707	1.96422e-06	9.02644e-06
COBS17442	28.904	0.620336	0.156241	3.97038	7.17595e-05	0.000246564
COBS13697	72.215	0.619329	0.114369	5.4152	6.12218e-08	3.59384e-07
COBS08973	657.087	0.6185	0.150484	4.11007	3.95542e-05	0.000142625
COBS07657	1351.95	0.618209	0.116047	5.32724	9.97157e-08	5.65679e-07
COBS18278	51.6641	0.618056	0.150601	4.10392	4.06209e-05	0.000146253
COBS15779	108.711	0.616372	0.0919326	6.7046	2.01959e-11	2.07637e-10
COBS07509	299.574	0.616142	0.12765	4.82683	1.38726e-06	6.5301e-06
COBS13623	545.501	0.615499	0.0704643	8.7349	2.43865e-18	6.92749e-17
COBS15970	694.279	0.614517	0.131016	4.69041	2.72662e-06	1.21642e-05
COBS12469	59.4404	0.614265	0.148097	4.14772	3.35801e-05	0.000122761
COBS11670	50.1659	0.613833	0.150434	4.08042	4.49542e-05	0.000160581
COBS08608	210.875	0.613525	0.0754905	8.12719	4.39374e-16	8.88356e-15
COBS19052	52.5379	0.613133	0.14647	4.18607	2.83831e-05	0.000105058
COBS06922	119.787	0.612319	0.0972441	6.29672	3.04008e-10	2.61606e-09
COBS10922	558.774	0.61231	0.156967	3.90089	9.58415e-05	0.000320288
COBS13665	446.949	0.611713	0.122049	5.01204	5.38566e-07	2.70345e-06
COBS04630	517.296	0.611662	0.0481363	12.7069	5.41577e-37	1.96552e-34
COBS12947	220.917	0.611542	0.129661	4.71646	2.39981e-06	1.08361e-05
COBS14953	179.489	0.611335	0.146951	4.16014	3.18052e-05	0.000116742
COBS05797	1361.22	0.611018	0.0631138	9.68121	3.6241e-22	1.95728e-20
COBS04814	51.6098	0.610781	0.131994	4.62733	3.70402e-06	1.61281e-05
COBS08365	91.897	0.61056	0.165024	3.69982	0.000215754	0.000675167
COBS01540	735.343	0.610359	0.0760467	8.0261	1.00621e-15	1.94243e-14
COBS10911	803.213	0.609757	0.0905176	6.73633	1.62432e-11	1.71617e-10
COBS06694	113.129	0.609513	0.134495	4.53186	5.84667e-06	2.44882e-05
COBS08375	1341.69	0.609352	0.0881656	6.91145	4.79741e-12	5.47947e-11
COBS00846	34.0612	0.607969	0.144124	4.21838	2.46063e-05	9.2207e-05
COBS05042	53.3491	0.607774	0.154975	3.92175	8.79068e-05	0.00029664
COBS10644	134.303	0.60774	0.132849	4.57466	4.76998e-06	2.03127e-05
COBS07986	699.981	0.607212	0.11733	5.17524	2.27615e-07	1.21749e-06
COBS16757	1969.82	0.606808	0.145303	4.17617	2.96463e-05	0.000109427
COBS18267	565.751	0.60653	0.14678	4.13222	3.59272e-05	0.000130663
COBS10255	45.6672	0.60633	0.118491	5.11709	3.10291e-07	1.62324e-06
COBS17414	565.147	0.60609	0.106305	5.70145	1.18792e-08	7.88161e-08
COBS18997	557.112	0.605649	0.0880008	6.88231	5.88877e-12	6.64237e-11
COBS15499	39.1762	0.605009	0.130823	4.62464	3.75243e-06	1.63243e-05
COBS16801	504.745	0.60468	0.0739761	8.17398	2.98372e-16	6.13523e-15
COBS11177	128.987	0.604286	0.121195	4.98608	6.16182e-07	3.06339e-06
COBS02696	1476.49	0.60268	0.107281	5.61776	1.93447e-08	1.23822e-07
COBS06485	530.286	0.602281	0.124114	4.85262	1.21838e-06	5.78772e-06
COBS04746	293.43	0.60221	0.0653719	9.21206	3.19916e-20	1.22747e-18
COBS18509	2594.43	0.601817	0.0821624	7.32473	2.39382e-13	3.34144e-12
COBS02321	835.457	0.601664	0.0867455	6.93596	4.03458e-12	4.6521e-11
COBS11401	359.403	0.600497	0.0708404	8.47675	2.31567e-17	5.68809e-16
COBS04568	124.822	0.600221	0.159005	3.77484	0.000160107	0.000513766
COBS02411	58.7219	0.600002	0.11418	5.25487	1.48133e-07	8.16418e-07
COBS00005	387.229	0.599295	0.0918691	6.52335	6.87531e-11	6.52773e-10
COBS09206	391.789	0.597224	0.13464	4.43569	9.1776e-06	3.71324e-05
COBS14057	28.7099	0.596843	0.163311	3.65463	0.000257553	0.000791134
COBS09819	40.0869	0.596478	0.113771	5.24278	1.58179e-07	8.68487e-07
COBS03972	141.98	0.596247	0.0981873	6.07254	1.25901e-09	9.83166e-09
COBS13785	124.71	0.59565	0.129056	4.61544	3.92261e-06	1.69781e-05
COBS03044	98.713	0.595573	0.142947	4.16639	3.09457e-05	0.000113847
COBS02769	133.672	0.595497	0.141446	4.21008	2.55283e-05	9.53176e-05
COBS02373	1621.96	0.59524	0.107381	5.54323	2.96949e-08	1.83908e-07
COBS04729	210.884	0.594092	0.0965577	6.15272	7.61672e-10	6.15657e-09
COBS16481	301.182	0.59283	0.0855128	6.93265	4.1302e-12	4.74412e-11
COBS05604	113.362	0.592502	0.113453	5.22243	1.76586e-07	9.60834e-07
COBS18347	730.45	0.592411	0.107665	5.50235	3.74765e-08	2.28495e-07
COBS10088	453.551	0.592242	0.105779	5.59888	2.15736e-08	1.36881e-07
COBS02940	394.07	0.591944	0.0768867	7.6989	1.37238e-14	2.2795e-13
COBS05623	17.5695	0.590698	0.159261	3.70898	0.000208094	0.000652744
COBS07343	341.721	0.590674	0.153656	3.84412	0.000120983	0.000398258
COBS11157	59.4971	0.59067	0.129484	4.5617	5.07403e-06	2.15002e-05
COBS15701	221.971	0.590546	0.140928	4.19041	2.78453e-05	0.00010312
COBS16223	242.555	0.59007	0.0812616	7.26136	3.83225e-13	5.22865e-12
COBS18345	53.5398	0.589522	0.120361	4.89796	9.68375e-07	4.67195e-06
COBS17246	255.691	0.588269	0.118251	4.97475	6.53315e-07	3.24245e-06
COBS10717	56.5922	0.587601	0.133585	4.39871	1.08897e-05	4.34662e-05
COBS09734	590.854	0.587485	0.121008	4.85494	1.20426e-06	5.72625e-06
COBS18683	144.857	0.587309	0.144049	4.07715	4.55915e-05	0.000162697
COBS06568	435.121	0.587262	0.0898942	6.53281	6.4545e-11	6.15233e-10
COBS03116	432.546	0.587105	0.13262	4.42699	9.55579e-06	3.85873e-05
COBS12349	569.303	0.587099	0.059018	9.94778	2.57869e-23	1.61357e-21
COBS10927	135.511	0.586819	0.0841672	6.97207	3.1232e-12	3.68015e-11
COBS05742	462.196	0.586594	0.0820929	7.14548	8.96792e-13	1.15517e-11
COBS08924	626.299	0.585578	0.0887262	6.59983	4.11624e-11	4.08337e-10
COBS04936	101.97	0.585402	0.162493	3.60262	0.000315027	0.000952759
COBS05169	612.265	0.585221	0.119659	4.89073	1.00462e-06	4.83398e-06
COBS03221	95.2172	0.585096	0.160928	3.63577	0.000277152	0.000846679
COBS16730	2100.66	0.584745	0.0892396	6.55253	5.65713e-11	5.46768e-10
COBS00512	70.1241	0.584564	0.096557	6.05409	1.41217e-09	1.09687e-08
COBS10205	152.213	0.584238	0.0801969	7.28505	3.21563e-13	4.42476e-12
COBS11893	513.904	0.583237	0.110638	5.27159	1.35246e-07	7.49091e-07
COBS05030	51.635	0.582985	0.130245	4.47606	7.6034e-06	3.11804e-05
COBS06428	81.2553	0.582582	0.143009	4.07373	4.62667e-05	0.000164702
COBS05540	224.699	0.582499	0.11571	5.03414	4.80009e-07	2.42798e-06
COBS00106	31.6719	0.581943	0.160179	3.63308	0.000280053	0.000854642
COBS18090	79.5377	0.581893	0.143857	4.04492	5.234e-05	0.000184422
COBS05950	394.47	0.581577	0.145011	4.01057	6.05713e-05	0.000210917
COBS10333	20.9792	0.581337	0.153433	3.78886	0.000151338	0.000487457
COBS11932	429.672	0.580944	0.151987	3.82231	0.000132206	0.000431676
COBS03877	79.437	0.580552	0.0951205	6.10333	1.03881e-09	8.24062e-09
COBS19031	432.801	0.579485	0.108268	5.35233	8.68293e-08	4.98025e-07
COBS03698	94.2281	0.579032	0.152071	3.80764	0.000140302	0.000455448
COBS05379	63.2552	0.578787	0.0957568	6.04434	1.50019e-09	1.1578e-08
COBS08918	95.8077	0.578156	0.129404	4.46783	7.90173e-06	3.23034e-05
COBS04126	357.023	0.577931	0.0937509	6.16453	7.06908e-10	5.74591e-09
COBS00866	129.819	0.577606	0.121798	4.74234	2.11266e-06	9.63956e-06
COBS11726	381.405	0.576861	0.0960036	6.00874	1.86967e-09	1.41956e-08
COBS09428	325.082	0.576398	0.0954868	6.03641	1.57578e-09	1.21356e-08
COBS06874	74.3817	0.576229	0.128952	4.46856	7.87497e-06	3.22212e-05
COBS11532	126.68	0.576093	0.0892446	6.45522	1.08065e-10	9.94785e-10
COBS13581	1080.47	0.576081	0.115352	4.99412	5.91037e-07	2.94544e-06
COBS10781	338.131	0.575066	0.0727935	7.89996	2.78987e-15	5.0689e-14
COBS01707	173.136	0.574507	0.0812766	7.06854	1.56571e-12	1.91809e-11
COBS01650	32.7973	0.57447	0.158378	3.6272	0.000286508	0.000872505
COBS05779	452.175	0.574346	0.116133	4.94557	7.59196e-07	3.73348e-06
COBS18097	71.1435	0.573734	0.102419	5.60185	2.12078e-08	1.34796e-07
COBS04389	45.4704	0.573317	0.136221	4.20873	2.5681e-05	9.58138e-05
COBS14806	200.698	0.5732	0.151668	3.7793	0.000157267	0.000504987
COBS16363	27.3305	0.572956	0.152383	3.75998	0.000169927	0.000542637
COBS13624	506.052	0.572007	0.114531	4.99434	5.90362e-07	2.94309e-06
COBS15231	72.1656	0.571949	0.116572	4.90642	9.27555e-07	4.48844e-06
COBS11003	242.306	0.571689	0.111941	5.10705	3.27224e-07	1.70445e-06
COBS07074	87.4648	0.57165	0.131711	4.34017	1.42371e-05	5.56937e-05
COBS17211	748.655	0.571403	0.10435	5.47583	4.35456e-08	2.62195e-07
COBS19126	318.923	0.570359	0.100973	5.64864	1.6172e-08	1.04667e-07
COBS13741	63.7189	0.570174	0.14707	3.8769	0.000105798	0.000351456
COBS03770	823.086	0.56985	0.112366	5.07139	3.94928e-07	2.02801e-06
COBS18939	244.02	0.569677	0.0774409	7.35628	1.89105e-13	2.67828e-12
COBS07718	1181.79	0.569616	0.0976577	5.83278	5.45106e-09	3.86015e-08
COBS05431	365.466	0.56923	0.0979888	5.80913	6.27969e-09	4.4061e-08
COBS16490	97.994	0.569149	0.119334	4.76937	1.84806e-06	8.53859e-06
COBS11533	166.337	0.568799	0.0998733	5.69521	1.23221e-08	8.14943e-08
COBS10133	239.374	0.568638	0.0737581	7.7095	1.26308e-14	2.11246e-13
COBS16913	533.652	0.567203	0.0853567	6.6451	3.03013e-11	3.05051e-10
COBS04160	251.323	0.56675	0.126157	4.4924	7.04238e-06	2.90603e-05
COBS15765	278.688	0.566505	0.133912	4.23042	2.33259e-05	8.77258e-05
COBS08602	1085.47	0.566099	0.065677	8.61944	6.72841e-18	1.80215e-16
COBS02126	1184.92	0.565609	0.114651	4.93333	8.08375e-07	3.96191e-06
COBS10406	597.405	0.565554	0.130565	4.33159	1.48038e-05	5.77087e-05
COBS11968	839.219	0.5638	0.0927389	6.07943	1.20611e-09	9.44905e-09
COBS07172	359.48	0.563759	0.091391	6.16865	6.8877e-10	5.61419e-09
COBS09309	545.358	0.563644	0.0799839	7.04696	1.82865e-12	2.21961e-11
COBS17352	43.2032	0.563605	0.142964	3.94228	8.07096e-05	0.000274458
COBS18823	278.891	0.563288	0.124298	4.53176	5.84935e-06	2.44924e-05
COBS01778	499.924	0.563091	0.0668199	8.42699	3.54682e-17	8.4547e-16
COBS11403	214.845	0.563013	0.127358	4.42072	9.83703e-06	3.96348e-05
dsx	110.359	0.562286	0.109843	5.11899	3.07169e-07	1.60807e-06
COBS14691	487.82	0.561744	0.0909051	6.17946	6.43213e-10	5.26651e-09
COBS12445	1840.88	0.561706	0.0678767	8.27539	1.28036e-16	2.82906e-15
COBS10412	99.9864	0.561344	0.114325	4.91008	9.10396e-07	4.41423e-06
COBS11569	68.3096	0.56102	0.127668	4.39438	1.11091e-05	4.43023e-05
COBS01523	187.348	0.560732	0.0866197	6.47349	9.5763e-11	8.89438e-10
COBS06427	130.369	0.560059	0.136604	4.09987	4.13384e-05	0.000148652
COBS18496	139.294	0.559703	0.0985416	5.67986	1.34802e-08	8.85886e-08
COBS11080	224.862	0.55956	0.11049	5.06436	4.09765e-07	2.09974e-06
COBS09528	113.72	0.558394	0.137026	4.07509	4.59968e-05	0.000163942
COBS16629	107.578	0.558374	0.123622	4.51679	6.27837e-06	2.6153e-05
COBS14301	106.263	0.558154	0.107663	5.18425	2.16888e-07	1.16441e-06
COBS14008	122.937	0.557309	0.121837	4.57424	4.77962e-06	2.03477e-05
COBS11188	139.051	0.557293	0.0960305	5.80329	6.50279e-09	4.54287e-08
COBS03527	62.4308	0.557103	0.135391	4.11476	3.87579e-05	0.000139893
COBS10766	28.9854	0.555336	0.139877	3.97018	7.18175e-05	0.000246705
COBS06431	455.703	0.554635	0.0914447	6.06526	1.31742e-09	1.02657e-08
COBS05783	402.664	0.554511	0.101982	5.43733	5.40862e-08	3.20086e-07
COBS17650	297.125	0.554128	0.136532	4.05859	4.93692e-05	0.000174889
COBS16364	67.48	0.553494	0.122705	4.51078	6.45911e-06	2.68442e-05
COBS08360	214.402	0.55347	0.0974284	5.68078	1.3408e-08	8.81541e-08
COBS09129	63.0186	0.55303	0.117695	4.69885	2.61631e-06	1.17225e-05
COBS17468	917.829	0.552301	0.105501	5.23501	1.64973e-07	9.02718e-07
COBS18541	2317.53	0.551917	0.080834	6.82778	8.62365e-12	9.48406e-11
COBS14430	81.5604	0.551644	0.118801	4.64342	3.42691e-06	1.50071e-05
COBS12437	375.5	0.550859	0.0972829	5.66244	1.49234e-08	9.70624e-08
COBS15724	158.24	0.550446	0.12189	4.51593	6.30391e-06	2.62467e-05
COBS10203	202.622	0.550251	0.143667	3.83004	0.000128123	0.000418967
COBS04893	729.831	0.549504	0.0638896	8.60084	7.91373e-18	2.10025e-16
COBS11114	90.8021	0.548711	0.139705	3.92763	8.57868e-05	0.000290025
COBS13513	449.842	0.548421	0.0948352	5.78289	7.34278e-09	5.09294e-08
COBS11636	1005.54	0.548075	0.130898	4.18705	2.82598e-05	0.000104628
COBS09108	173.786	0.546357	0.110309	4.95295	7.30968e-07	3.60199e-06
COBS18548	288.336	0.546258	0.126165	4.32972	1.493e-05	5.81069e-05
COBS00084	1137.87	0.546103	0.0770932	7.08366	1.40392e-12	1.73453e-11
COBS10592	119.08	0.546065	0.115545	4.72599	2.28997e-06	1.03983e-05
COBS07531	1575.47	0.546056	0.0890191	6.13415	8.5617e-10	6.87445e-09
COBS19486	509.016	0.545977	0.090726	6.01786	1.76737e-09	1.35037e-08
COBS10300	876.183	0.545808	0.0884372	6.1717	6.75611e-10	5.51003e-09
COBS07560	102.853	0.545713	0.105892	5.15348	2.55701e-07	1.35871e-06
COBS02090	178.282	0.545297	0.127109	4.28999	1.78678e-05	6.87449e-05
COBS14080	30.685	0.545231	0.146476	3.72233	0.000197395	0.000621467
COBS00788	316.459	0.545126	0.084432	6.45639	1.07232e-10	9.87746e-10
COBS07832	584.646	0.543312	0.0954812	5.69025	1.26854e-08	8.37062e-08
COBS01313	54.9708	0.54321	0.125335	4.33405	1.46391e-05	5.7128e-05
COBS17556	415.093	0.542558	0.0735989	7.37181	1.68321e-13	2.39795e-12
COBS06461	97.5302	0.542048	0.113005	4.79666	1.61335e-06	7.51394e-06
COBS08551	150.923	0.541865	0.081341	6.66164	2.70785e-11	2.74127e-10
COBS17428	331.834	0.540032	0.0857422	6.29832	3.0088e-10	2.59221e-09
COBS16357	407.336	0.540029	0.0984665	5.48439	4.149e-08	2.50963e-07
COBS14177	306.689	0.538451	0.0813984	6.615	3.71541e-11	3.70954e-10
COBS14442	837.099	0.538322	0.134641	3.9982	6.38259e-05	0.0002214
COBS11305	310.299	0.537762	0.0926434	5.80464	6.45042e-09	4.51281e-08
COBS06019	732.434	0.537633	0.0502146	10.7067	9.46635e-27	9.16153e-25
COBS07675	253.909	0.536825	0.0996687	5.3861	7.20038e-08	4.16778e-07
COBS03102	471.968	0.536403	0.0716789	7.48341	7.24171e-14	1.08491e-12
COBS14457	53.1589	0.53509	0.129409	4.13487	3.55156e-05	0.00012938
COBS02749	196.206	0.534801	0.0884167	6.04864	1.46069e-09	1.12994e-08
COBS16788	559.951	0.534385	0.141407	3.77905	0.000157428	0.000505392
COBS10853	1037.45	0.533307	0.126248	4.22429	2.39695e-05	8.99831e-05
COBS03003	274.775	0.532768	0.0981904	5.42587	5.76734e-08	3.39791e-07
COBS18454	1428.71	0.53276	0.0937262	5.68421	1.31417e-08	8.65204e-08
COBS12859	416.735	0.532548	0.0881255	6.04306	1.51215e-09	1.16642e-08
COBS16006	3684.55	0.532473	0.0730869	7.28547	3.20541e-13	4.41488e-12
COBS10968	511.072	0.532082	0.0972182	5.47307	4.42297e-08	2.65433e-07
COBS18348	222.018	0.531982	0.0806354	6.59738	4.18486e-11	4.13557e-10
COBS18836	717.933	0.531748	0.114049	4.66243	3.1249e-06	1.38011e-05
COBS00115	128.536	0.531557	0.115672	4.59537	4.31989e-06	1.85483e-05
COBS01438	529.008	0.531519	0.119772	4.43776	9.09017e-06	3.68095e-05
COBS17869	253.465	0.53107	0.0587003	9.04715	1.46749e-19	4.97747e-18
COBS03387	84.5333	0.530647	0.122395	4.33552	1.45416e-05	5.68085e-05
COBS16035	163.487	0.530177	0.12687	4.1789	2.92917e-05	0.0001082
COBS05029	425.727	0.529853	0.1086	4.87894	1.0666e-06	5.11355e-06
COBS08610	113.898	0.529808	0.108355	4.88958	1.01054e-06	4.8592e-06
COBS07993	256.43	0.529441	0.13662	3.87527	0.000106505	0.000353481
COBS15429	121.457	0.529359	0.113804	4.6515	3.29526e-06	1.4483e-05
COBS13491	416.1	0.529118	0.130286	4.06122	4.88175e-05	0.000173061
COBS05074	449.851	0.528957	0.10029	5.27425	1.33299e-07	7.39436e-07
COBS07224	1213.73	0.528701	0.0856397	6.17355	6.67724e-10	5.45183e-09
COBS17381	52.5054	0.528148	0.142422	3.70834	0.000208626	0.000654272
COBS18530	147.066	0.528118	0.143814	3.67222	0.000240448	0.000745056
COBS01336	458.729	0.527363	0.113899	4.63011	3.65471e-06	1.59421e-05
COBS00530	124.838	0.52686	0.100329	5.25135	1.50988e-07	8.31209e-07
COBS07885	328.73	0.526857	0.0875489	6.01786	1.76737e-09	1.35037e-08
COBS06049	21.0368	0.526274	0.138685	3.79475	0.000147793	0.000477843
COBS00244	89.0811	0.525486	0.0880568	5.96757	2.40808e-09	1.80476e-08
COBS18824	434.927	0.525321	0.146364	3.58915	0.000331761	0.000996932
COBS06128	183.76	0.525055	0.117671	4.46206	8.11743e-06	3.31292e-05
COBS02764	36.6664	0.524544	0.140852	3.72407	0.000196036	0.000617857
COBS05047	471.432	0.524121	0.131978	3.97127	7.14912e-05	0.0002457
COBS19764	185.212	0.523996	0.144567	3.62459	0.000289422	0.000881009
COBS05941	64.9004	0.523339	0.138305	3.78396	0.000154354	0.000496292
COBS11081	336.043	0.523271	0.0956629	5.46995	4.50159e-08	2.69483e-07
COBS17765	57.5065	0.523165	0.101703	5.14402	2.68914e-07	1.42424e-06
COBS03705	3928.42	0.523082	0.119097	4.39208	1.12273e-05	4.47398e-05
COBS18798	124.72	0.522227	0.125767	4.15234	3.29094e-05	0.00012046
COBS05091	141.169	0.521696	0.111083	4.69646	2.64703e-06	1.18382e-05
COBS01387	1200.64	0.521146	0.0874467	5.95959	2.52876e-09	1.89032e-08
COBS16351	1758.74	0.52065	0.106922	4.86943	1.11922e-06	5.3499e-06
COBS09214	85.5328	0.519745	0.139266	3.73203	0.000189945	0.000600653
COBS16359	982.077	0.519179	0.0732125	7.0914	1.32765e-12	1.65012e-11
COBS07303	63.4155	0.518937	0.113683	4.56476	5.0007e-06	2.1208e-05
COBS13583	67.96	0.518828	0.127341	4.07433	4.61477e-05	0.000164352
COBS19702	542.177	0.517998	0.107705	4.80943	1.51358e-06	7.07425e-06
COBS00544	463.525	0.517644	0.101088	5.12072	3.04364e-07	1.59569e-06
COBS03390	105.844	0.517559	0.0903527	5.7282	1.015e-08	6.84067e-08
COBS10247	727.178	0.516937	0.0932904	5.54116	3.0047e-08	1.85772e-07
COBS13797	1363.07	0.516909	0.0698274	7.40267	1.33469e-13	1.92984e-12
COBS18561	176.545	0.516078	0.131779	3.91624	8.99394e-05	0.000303006
COBS01330	147.223	0.515843	0.12191	4.23136	2.32287e-05	8.74056e-05
COBS15376	430.937	0.515523	0.0785199	6.5655	5.18569e-11	5.05918e-10
COBS16780	376.311	0.514922	0.0643202	8.0056	1.18887e-15	2.26791e-14
COBS15150	680.196	0.514905	0.0896007	5.74666	9.10216e-09	6.20066e-08
COBS02410	538.941	0.514592	0.132379	3.88727	0.000101376	0.000337852
COBS16968	1116.97	0.514386	0.111251	4.62364	3.77071e-06	1.63891e-05
COBS03368	185.018	0.513336	0.0605185	8.48229	2.20809e-17	5.46078e-16
COBS01384	104.42	0.512765	0.0936839	5.47335	4.41603e-08	2.65126e-07
COBS01383	869.316	0.511842	0.0447157	11.4466	2.44601e-30	3.73776e-28
COBS17191	357.034	0.511074	0.0781891	6.53638	6.30251e-11	6.01931e-10
COBS06407	1253.72	0.511063	0.130657	3.91148	9.17316e-05	0.0003079
COBS16681	74.2299	0.511032	0.139768	3.65628	0.000255901	0.000787225
COBS06501	3712.27	0.510436	0.0994372	5.13325	2.84783e-07	1.50156e-06
COBS09312	1293.24	0.509986	0.0955873	5.3353	9.53888e-08	5.42617e-07
COBS06126	55.404	0.509888	0.115122	4.4291	9.4629e-06	3.82228e-05
COBS10059	1530.08	0.508682	0.116504	4.36624	1.26404e-05	4.99048e-05
COBS05483	442.991	0.508512	0.0810837	6.27144	3.57717e-10	3.04752e-09
COBS13105	47.5601	0.508103	0.123048	4.1293	3.63865e-05	0.000132122
COBS06530	135.556	0.507845	0.127213	3.99208	6.5496e-05	0.000226814
COBS11370	68.3642	0.507832	0.11996	4.23332	2.30263e-05	8.66664e-05
COBS01879	110.92	0.507684	0.121966	4.16252	3.14751e-05	0.000115648
COBS13267	144.229	0.507541	0.077931	6.5127	7.38137e-11	6.97037e-10
COBS09368	45.7177	0.507521	0.138849	3.65521	0.00025697	0.000790011
COBS10506	101.265	0.507398	0.0872891	5.81284	6.14215e-09	4.31586e-08
COBS03835	142.843	0.506404	0.0884225	5.72709	1.02168e-08	6.87607e-08
COBS17775	689.15	0.506191	0.0589142	8.59201	8.54623e-18	2.25985e-16
COBS02461	67.648	0.505404	0.130277	3.87944	0.000104695	0.000348033
COBS10859	168.342	0.504889	0.129272	3.90563	9.39805e-05	0.000314576
COBS19393	32.2603	0.504739	0.11192	4.50983	6.48804e-06	2.6949e-05
COBS08556	131.853	0.50431	0.10517	4.79521	1.62508e-06	7.5613e-06
COBS11919	30.3902	0.503425	0.101718	4.94923	7.45093e-07	3.66786e-06
COBS09191	398.325	0.501367	0.107452	4.66597	3.07162e-06	1.35864e-05
COBS16830	928.458	0.501326	0.0983923	5.09517	3.48421e-07	1.80515e-06
COBS09319	356.87	0.501028	0.0767871	6.5249	6.80473e-11	6.46494e-10
COBS18628	486.949	0.500928	0.0799583	6.26487	3.73133e-10	3.16956e-09
COBS15982	107.29	0.500872	0.0898785	5.57277	2.50723e-08	1.57089e-07
COBS18061	72.1767	0.500365	0.139028	3.59903	0.000319404	0.000964188
COBS07789	40.8391	0.499864	0.135685	3.68401	0.000229592	0.000715078
COBS07512	64.0827	0.499655	0.11501	4.34445	1.39622e-05	5.47071e-05
COBS18712	421.881	0.498969	0.105803	4.71604	2.40484e-06	1.08555e-05
COBS08132	95.8328	0.498661	0.109325	4.56129	5.084e-06	2.15299e-05
COBS09979	450.55	0.498459	0.108894	4.57749	4.70597e-06	2.00695e-05
COBS13753	131.156	0.49709	0.0854998	5.81393	6.10235e-09	4.29413e-08
COBS08259	686.815	0.497014	0.0832748	5.96836	2.3965e-09	1.797e-08
COBS13921	1648	0.49626	0.0749619	6.62016	3.58809e-11	3.59229e-10
COBS18316	923.17	0.496205	0.0818483	6.0625	1.34026e-09	1.04381e-08
COBS03713	56.8441	0.495786	0.0996336	4.9761	6.48792e-07	3.22111e-06
COBS10184	38.7529	0.495735	0.13046	3.79989	0.000144759	0.000468973
COBS11020	1013.99	0.495509	0.0965458	5.13238	2.86104e-07	1.50594e-06
COBS11933	656.467	0.494641	0.093676	5.28034	1.28944e-07	7.16371e-07
COBS06567	69.2984	0.494202	0.135511	3.64697	0.000265356	0.000813724
COBS13521	41.4055	0.492937	0.134723	3.6589	0.000253301	0.000780219
COBS12056	45.618	0.492856	0.117336	4.20037	2.66478e-05	9.91912e-05
COBS05868	495.937	0.492844	0.0763159	6.45794	1.06136e-10	9.79516e-10
COBS04834	136.843	0.492662	0.130105	3.78665	0.00015269	0.000491267
COBS06098	865.846	0.491654	0.106267	4.6266	3.7171e-06	1.61803e-05
COBS12221	415.594	0.490863	0.130424	3.7636	0.000167488	0.000535555
COBS19866	1028.17	0.490188	0.0896629	5.46702	4.57677e-08	2.73758e-07
COBS12617	253.841	0.489071	0.130566	3.74579	0.000179827	0.000571486
COBS18292	1886.72	0.488547	0.132049	3.69974	0.000215822	0.000675235
COBS13887	363.679	0.488325	0.0643945	7.58333	3.36795e-14	5.28568e-13
COBS10486	899.211	0.488322	0.105636	4.62267	3.78827e-06	1.64555e-05
COBS05306	124.833	0.487769	0.0927011	5.26174	1.42695e-07	7.87646e-07
COBS13630	310.606	0.487073	0.0649737	7.49647	6.55585e-14	9.87254e-13
COBS04585	172.047	0.486452	0.116882	4.16193	3.15574e-05	0.000115891
COBS05511	565.433	0.486382	0.0926138	5.25172	1.50687e-07	8.29866e-07
COBS16973	115.873	0.484464	0.0888369	5.4534	4.94148e-08	2.93517e-07
COBS11764	145.533	0.48311	0.0880693	5.48556	4.12161e-08	2.4941e-07
COBS06742	172.058	0.482943	0.0867902	5.5645	2.62913e-08	1.64301e-07
COBS05804	764.471	0.48219	0.0703199	6.85709	7.02763e-12	7.84167e-11
COBS19197	42.3049	0.481342	0.115107	4.18171	2.8933e-05	0.000106984
COBS02268	265.259	0.480725	0.11438	4.20286	2.63559e-05	9.81802e-05
COBS07221	177.302	0.480308	0.0994353	4.83035	1.3629e-06	6.42168e-06
COBS12525	227.453	0.479825	0.0771389	6.22028	4.96284e-10	4.14293e-09
COBS17350	270.369	0.479735	0.115018	4.17094	3.03346e-05	0.000111825
COBS18833	1739.52	0.47962	0.130667	3.67055	0.000242027	0.000749308
COBS08469	77.8839	0.478715	0.0914821	5.23288	1.66893e-07	9.12881e-07
COBS14790	8317.48	0.478178	0.107532	4.44686	8.71352e-06	3.53586e-05
COBS08680	770.378	0.47808	0.0534282	8.94807	3.61736e-19	1.16683e-17
COBS17983	257.182	0.477248	0.10736	4.44532	8.77602e-06	3.55771e-05
COBS18071	8450.42	0.47653	0.129646	3.67561	0.00023728	0.000736432
COBS18092	233.461	0.47576	0.0608454	7.81916	5.3177e-15	9.39137e-14
COBS10757	250.278	0.474512	0.121492	3.90569	9.39567e-05	0.000314569
COBS08031	2863.13	0.474291	0.0836686	5.66868	1.43901e-08	9.39303e-08
COBS18449	76.6131	0.474217	0.130677	3.62894	0.000284591	0.00086776
COBS07719	140.201	0.474077	0.0657134	7.21432	5.42038e-13	7.22567e-12
COBS15754	1705.96	0.472849	0.0920291	5.13804	2.77621e-07	1.46775e-06
COBS00230	134.16	0.472254	0.076833	6.1465	7.92121e-10	6.392e-09
COBS08972	144.171	0.472094	0.0777283	6.07364	1.25042e-09	9.77508e-09
COBS03407	156.826	0.471905	0.108425	4.35238	1.34668e-05	5.29086e-05
COBS07057	4724.14	0.471725	0.0512038	9.21269	3.18049e-20	1.22747e-18
COBS14689	172.136	0.471463	0.126704	3.72096	0.000198464	0.000624696
COBS01121	113.214	0.471324	0.120167	3.92224	8.77285e-05	0.000296176
COBS02251	909.613	0.470455	0.106652	4.41113	1.02834e-05	4.12388e-05
COBS07066	362.632	0.469101	0.128223	3.65848	0.000253716	0.000781331
COBS02460	90.1596	0.466818	0.0963285	4.84611	1.25907e-06	5.96146e-06
COBS16115	554.437	0.466704	0.119291	3.9123	9.14207e-05	0.000306999
COBS05490	1124.95	0.466409	0.0882175	5.28704	1.24315e-07	6.92509e-07
COBS16450	1166.52	0.46607	0.0817824	5.6989	1.20582e-08	7.99441e-08
COBS14697	943.009	0.463085	0.0635572	7.28612	3.19017e-13	4.39807e-12
COBS15942	90.5191	0.462967	0.111017	4.17023	3.04287e-05	0.000112144
COBS05122	304.011	0.462944	0.0816309	5.67119	1.41807e-08	9.27301e-08
COBS10718	114.383	0.462619	0.0914878	5.05661	4.26768e-07	2.18071e-06
COBS08334	596.906	0.46258	0.0660295	7.00566	2.45828e-12	2.93236e-11
COBS15311	602.978	0.462249	0.0670804	6.89097	5.54134e-12	6.27485e-11
COBS19055	380.957	0.461984	0.0572281	8.07266	6.87802e-16	1.35848e-14
COBS02509	41.2611	0.461872	0.115905	3.98491	6.75067e-05	0.000233054
COBS17920	285.046	0.46187	0.0762542	6.05698	1.38701e-09	1.0779e-08
COBS12038	37.4147	0.461365	0.117481	3.92714	8.59616e-05	0.000290481
COBS08539	1413.16	0.459339	0.0900577	5.10049	3.38771e-07	1.76018e-06
COBS11179	593.45	0.458984	0.0876414	5.23707	1.63148e-07	8.93404e-07
COBS11998	529.438	0.458467	0.0903254	5.07573	3.86013e-07	1.98638e-06
COBS09061	2024.92	0.457772	0.103495	4.42313	9.72803e-06	3.92174e-05
COBS17225	108.025	0.456398	0.090818	5.02541	5.02346e-07	2.53478e-06
COBS03786	1493.25	0.45625	0.0683019	6.67991	2.39088e-11	2.43568e-10
COBS06774	371.669	0.455696	0.0772843	5.89635	3.71623e-09	2.7069e-08
COBS03418	64.2208	0.455614	0.122605	3.71611	0.000202314	0.000636401
COBS02850	672.896	0.454946	0.0827162	5.50009	3.79599e-08	2.31248e-07
COBS07637	475.185	0.45463	0.119745	3.79664	0.000146669	0.000474632
COBS18757	395.762	0.454489	0.0997181	4.55774	5.17072e-06	2.18554e-05
COBS02246	284.391	0.453931	0.0832179	5.45472	4.905e-08	2.91469e-07
COBS11068	673.787	0.45345	0.0754287	6.01163	1.83668e-09	1.3989e-08
COBS08352	560.292	0.453313	0.0766297	5.91563	3.30613e-09	2.43013e-08
COBS13938	327.826	0.452946	0.10461	4.32987	1.49197e-05	5.80979e-05
COBS09130	1333.5	0.452903	0.0826438	5.48018	4.24897e-08	2.56369e-07
COBS03347	5432.74	0.452499	0.0826588	5.4743	4.39251e-08	2.64042e-07
COBS15764	558.566	0.452499	0.119199	3.79617	0.000146951	0.000475332
COBS08672	80.8214	0.452092	0.119378	3.78707	0.000152432	0.000490547
COBS13155	878.307	0.451712	0.0623153	7.24882	4.20415e-13	5.71457e-12
COBS08085	238.381	0.451261	0.103221	4.3718	1.23224e-05	4.87558e-05
[truncated: 2,833 more rows]
